# Supplementary material for: KDM1A maintains genome-wide homeostasis of transcriptional enhancers
Source: HighWire-hosted journal article supplement (doi:10.1101/gr.234559.118), 2021-01-07
Supplement: Supplementary_Table_S2.xlsx [file Supplementary_Table_S2.xlsx]

## Sheet: Putative enhancers in mESCs
Supplemental_Table_S2.
Putative enhancers are identified using parameters denoted in column K:T at row 3. Changes in eRNA levels in KDM1A-GT cells are presented in columns E:J. Columns U, V, and W are ChIP-seq seignals of EP300, KDM1A, and KDM5C.
Chr	Left	Right	Enhancer_ID:::Chr:::Center	WT_mESC_GROSEQ_DESEQ_BaseMean	KDM1A-GT_mESC_GROSEQ_DESEQ_BaseMean	GRO-Seq_Fold_Change	Log2FC	p-value	q-value	H3K4me1_ratio	H3K4me2_ratio	H3K4me3_ratio	H3K27Ac_ratio	H3K27me3_ratio	H3K9Ac_ratio	H3K9me3_ratio	NORM_GROSEQ	NORM_NUCLEAR	NORM_TOTAL_RNASEQ	EP300	KDM1A	KDM5C
chr1	3671238	3672238	p300_10:::chr1:::3671738	0.637958	2.841	4.45327	2.15487	0.412116	0.750975	7.15462	1.62503	0.609221	1.21644	1.13205	0.274325	0.767895	0.0103185	0	0	3.46988	5.12098	5.89331
chr1	3941611	3942611	DHS_64:::chr1:::3942111	0	2.4242	Inf	Inf	0.266502	0.576516	3.6504	0.601906	0.460156	0.974824	0.547538	0.310805	1.27067	0	0.00612614	0	0.737118	1.12816	1.46747
chr1	3945811	3946811	p300_13:::chr1:::3946311	4.29897	3.62354	0.842885	-0.246592	0.965263	1	2.58947	1.82466	0.948568	1.48288	0.451478	0.91121	1.34036	0.0722294	0.0122523	0	2.5325	2.79071	2.48054
chr1	3984473	3985473	p300_15:::chr1:::3984973	7.79326	12.9801	1.66556	0.736006	0.361944	0.693199	3.43754	2.95031	1.26823	1.57299	0.33867	0.992284	0.620263	0.13414	0	0	7.86689	4.10163	2.83113
chr1	4128805	4129805	p300_17:::chr1:::4129305	0	3.64907	Inf	Inf	0.109749	0.321435	2.34539	0.640636	0.232084	0.741731	0.708358	0.548651	1.34382	0	0.00612614	0	2.06024	2.84499	1.42476
chr1	4437755	4438755	DHS_105:::chr1:::4438255	0.582381	0	0	#NAME?	0.903996	1	2.38595	0.488375	0.268663	0.652562	0.590095	0.352846	0.83044	0.0103185	0	0	0.878666	0.988016	1.27447
chr1	4461549	4462549	DHS_108:::chr1:::4462049	0	1.59061	Inf	Inf	0.481613	0.813249	1.94082	0.870448	0.736756	0.862862	1.15519	0.948885	1.80447	0	0	0	0.710658	1.28189	1.90997
chr1	4533790	4534790	p300_21:::chr1:::4534290	29.8149	38.8383	1.30265	0.381444	0.34672	0.679976	1.98108	2.47765	0.823899	2.20014	0.835613	1.00992	0.66955	0.505606	0.00612614	0	8.7253	3.81545	2.75885
chr1	4589506	4590506	DHS_128:::chr1:::4590006	5.04809	10.5304	2.08602	1.06075	0.219886	0.511421	1.78225	0.368225	0.39442	1.06222	0.546037	0.469661	1.29128	0.0825479	0	0	3.14504	2.19185	1.93706
chr1	4841809	4842809	DHS_189:::chr1:::4842309	608.613	634.613	1.04272	0.0603521	0.592411	0.908576	3.5816	5.24093	3.76437	3.63193	0.198548	5.91403	0.204081	10.3185	0.245046	0.355852	2.78749	6.79119	2.93326
chr1	4845136	4846136	p300_36:::chr1:::4845636	170.403	211.535	1.24138	0.311947	0.0722692	0.239229	4.81395	2.13371	0.985646	3.79948	0.315758	1.8322	0.264064	2.88918	0.104144	0.0854044	6.44715	8.64362	3.21584
chr1	5214538	5215538	DHS_272:::chr1:::5215038	0.637958	6.09879	9.55987	3.25699	0.0603603	0.210331	2.9201	0.405464	0.407767	0.946329	0.508207	0.42843	0.644545	0.0103185	0	0	1.1724	0.769014	1.54047
chr1	5222708	5223708	p300_56:::chr1:::5223208	8.54237	22.4217	2.62476	1.39219	0.0212271	0.0960537	4.44884	1.07317	0.529649	2.28278	0.598572	0.635987	0.895987	0.144459	0.00612614	0	8.01303	6.67818	3.32188
chr1	5512081	5513081	DHS_298:::chr1:::5512581	0	1.19934	Inf	Inf	0.639786	0.933728	3.09076	0.478427	0.270342	0.572709	0.555226	0.649237	0.766695	0	0	0	1.44352	0.757479	1.03457
chr1	5933234	5934234	DHS_341:::chr1:::5933734	2.44068	10.9472	4.48531	2.16521	0.0351347	0.140315	2.63011	0.4841	0.411949	0.766006	0.77769	0.747606	0.939109	0.041274	0	0	1.81971	1.65268	2.00644
chr1	6043392	6044392	DHS_354:::chr1:::6043892	0	1.56508	Inf	Inf	0.589083	0.905337	3.36409	0.433357	0.321835	0.559544	0.536131	0.236701	0.627703	0	0	0	1.8044	1.57808	1.65244
chr1	6048888	6049888	p300_68:::chr1:::6049388	0	2.00741	Inf	Inf	0.358611	0.690707	5.34443	1.03288	0.669671	1.52541	0.451509	0.0959464	1.12377	0	0.00612614	0	13.5393	14.7764	5.16435
chr1	6132602	6133602	p300_70:::chr1:::6133102	0.637958	21.7668	34.1194	5.09252	1.77952e-06	3.60483e-05	3.53627	1.75581	0.583865	1.38085	0.594017	1.04798	0.542268	0.0103185	0	0	3.18257	5.84511	4.0731
chr1	6438748	6439748	p300_75:::chr1:::6439248	43.1831	27.032	0.625985	-0.6758	0.0762586	0.248984	5.28548	1.46019	0.43963	3.49698	0.523909	0.615877	0.884668	0.732613	0	0.0142341	24.4657	11.4969	5.12513
chr1	6447747	6448747	p300_76:::chr1:::6448247	10.2895	10.8451	1.054	0.0758681	1	1	5.81634	1.48892	0.552879	1.99565	0.319127	0.580896	0.48706	0.175414	0	0.0142341	14.1009	14.8306	6.53411
chr1	6860159	6861159	p300_79:::chr1:::6860659	4.82578	2.81547	0.583424	-0.777384	0.595332	0.91106	2.64922	1.26471	0.556132	2.67001	0.599291	0.422004	0.893132	0.0825479	0	0	5.0812	6.81731	5.93152
chr1	7010391	7011391	p300_86:::chr1:::7010891	3.02306	2.00741	0.664031	-0.590677	0.824536	1	2.3578	1.01735	0.512688	1.24183	0.640393	0.822178	1.04317	0.0515925	0	0.0427022	3.02573	4.36625	2.52995
chr1	7020859	7021859	DHS_460:::chr1:::7021359	0	2.37315	Inf	Inf	0.270922	0.581627	2.23239	0.475455	0.284758	0.961038	0.441874	0.448781	0.694234	0	0.0122523	0.0569363	0.638609	2.09441	0.889951
chr1	7035023	7036023	DHS_462:::chr1:::7035523	17.3071	21.401	1.23655	0.30632	0.562925	0.882483	4.64714	1.19195	0.775998	3.65946	0.393515	1.17769	1.58156	0.288918	0.0122523	0.0569363	1.2891	2.25482	3.65708
chr1	7036958	7037958	p300_87:::chr1:::7037458	43.2942	38.0047	0.877823	-0.187997	0.620708	0.933728	7.38736	1.88897	0.779364	6.90311	0.3557	0.614143	1.06637	0.732613	0.00612614	0.0142341	8.21898	14.1942	8.69907
chr1	7042145	7043145	p300_88:::chr1:::7042645	51.6143	16.7652	0.324817	-1.6223	4.1316e-05	0.000550464	4.45441	1.62615	0.805113	4.65218	0.330707	0.993946	2.03996	0.877072	0.0183784	0.0996385	7.37278	5.92166	4.7179
chr1	7058230	7059230	p300_90:::chr1:::7058730	0.637958	1.61613	2.53329	1.34101	0.790513	1	3.54524	0.546164	0.570391	2.13893	0.354332	0.233059	3.94005	0.0103185	0	0	4.1455	2.64146	2.05145
chr1	7191400	7192400	p300_97:::chr1:::7191900	5.51931	4.45713	0.807552	-0.308373	0.872174	1	2.22297	0.689095	0.299435	1.16926	0.695731	0.171604	1.02392	0.0928664	0	0	3.05238	1.60172	2.36994
chr1	7194540	7195540	DHS_522:::chr1:::7195040	4.93693	4.43161	0.897644	-0.155784	1	1	2.93295	0.985239	0.736155	1.34604	0.478517	0.843774	1.58496	0.0825479	0.0122523	0.0284681	0.750424	1.20322	2.09155
chr1	7299229	7300229	p300_104:::chr1:::7299729	12.7858	42.6999	3.33965	1.7397	0.000143837	0.0015993	3.03764	1.58746	1.03665	1.18492	0.737518	1.30275	1.55746	0.216688	0.00612614	0	4.93837	5.28242	4.3107
chr1	7309093	7310093	p300_107:::chr1:::7309593	1.8583	19.0534	10.2532	3.358	0.000170697	0.00184806	4.90485	1.29134	0.370754	1.7442	1.30857	0.649237	2.03161	0.0309555	0.0122523	0	7.76038	8.72616	5.46252
chr1	7430266	7431266	DHS_554:::chr1:::7430766	0.637958	0.391271	0.613318	-0.705292	1	1	5.10743	0.471605	0.150103	0.805935	0.325407	0.289134	0.522784	0.0103185	0	0	2.05717	1.71736	1.61957
chr1	7441408	7442408	p300_111:::chr1:::7441908	4.13224	8.54852	2.06874	1.04875	0.338253	0.667885	5.26876	0.766788	0.333194	1.02228	0.456208	0.381904	1.58245	0.0722294	0	0.0284681	14.2654	7.87184	3.04285
chr1	7483831	7484831	p300_112:::chr1:::7484331	3.60544	12.5889	3.49163	1.8039	0.0471346	0.174897	8.63083	0.600164	0.37143	1.77845	0.493149	0.709549	2.28149	0.061911	0	0	4.54355	2.98024	3.16589
chr1	7492221	7493221	DHS_566:::chr1:::7492721	6.04612	15.2512	2.52248	1.33484	0.0755078	0.247255	2.65471	0.607755	0.456726	2.91249	0.36172	0.621009	2.85391	0.103185	0	0	2.1088	2.10777	2.45897
chr1	7533268	7534268	DHS_571:::chr1:::7533768	1.80272	4.40608	2.44413	1.28932	0.449768	0.787556	1.8446	0.363583	0.311558	0.942622	0.65765	0.409183	0.443085	0.0309555	0.0122523	0.0142341	1.84383	1.655	1.73877
chr1	7581114	7582114	p300_117:::chr1:::7581614	3.02306	4.8484	1.60381	0.681501	0.681185	0.961382	1.99827	0.492571	0.321321	1.36502	0.372266	0.623268	1.33432	0.0515925	0.00612614	0	9.60809	5.09026	1.15872
chr1	7722555	7723555	p300_119:::chr1:::7723055	2.44068	4.01481	1.64496	0.718051	0.704421	0.980552	5.09982	0.991374	0.493025	1.1597	0.780054	0.379873	1.03027	0.041274	0.00612614	0	7.24833	3.70681	4.40242
chr1	8088640	8089640	DHS_628:::chr1:::8089140	0	2.03293	Inf	Inf	0.355783	0.689514	3.9174	0.678774	0.325223	1.68383	0.473125	0.298991	2.32203	0	0	0	1.97535	1.19602	2.6318
chr1	9432672	9433672	p300_136:::chr1:::9433172	6.04612	3.25779	0.538824	-0.892113	0.458867	0.797056	6.75531	1.55673	0.431882	1.76676	0.561006	0.663199	1.06449	0.103185	0	0	2.73183	8.63363	2.66985
chr1	9459800	9460800	p300_138:::chr1:::9460300	64.0956	116.668	1.82022	0.864112	0.000418065	0.00393583	1.94904	5.58219	2.71363	2.92572	0.570753	1.49428	0.728762	1.08344	0.0490091	0.0284681	5.49914	3.28642	4.4886
chr1	9691845	9692845	p300_149:::chr1:::9692345	650.88	480.817	0.738718	-0.436905	0.000114978	0.00132279	5.73649	3.58837	1.34856	3.73615	0.390418	1.18428	0.287417	11.0408	0.147027	0.398554	7.44802	10.659	4.5831
chr1	9943347	9944347	p300_162:::chr1:::9943847	27.7343	41.0838	1.48133	0.566897	0.159893	0.41557	4.65271	2.39178	0.942596	1.48884	0.583159	1.34249	0.291814	0.474651	0	0	2.66195	2.87585	2.57181
chr1	10245417	10246417	DHS_920:::chr1:::10245917	0.637958	6.51559	10.2132	3.35236	0.0468027	0.173977	2.09136	1.03768	0.422914	1.60992	0.482543	0.59246	0.638273	0.0103185	0	0	1.66856	0.921647	2.09798
chr1	10274972	10275972	p300_179:::chr1:::10275472	15.6421	22.5238	1.43995	0.526015	0.350771	0.685561	2.3217	1.73441	0.957347	1.9285	0.430311	1.0973	0.868933	0.268281	0	0	3.90361	1.70699	2.71999
chr1	10823376	10824376	DHS_986:::chr1:::10823876	1.16476	3.62354	3.11097	1.63737	0.44141	0.781071	2.18749	0.45906	0.334836	0.716008	0.597381	1.05541	0.699706	0.020637	0.00612614	0	1.47908	0.895542	0.883375
chr1	10840974	10841974	DHS_990:::chr1:::10841474	3.07864	2.44973	0.795719	-0.32967	0.96156	1	2.97878	0.645111	0.517205	1.14142	0.503162	0.686418	1.20405	0.0515925	0	0	1.62794	0.533906	1.94456
chr1	10842716	10843716	p300_185:::chr1:::10843216	3.66102	6.07327	1.6589	0.730229	0.580047	0.897817	5.86389	0.736673	0.43963	2.06072	0.312116	0.513231	1.17389	0.061911	0	0	12.3242	8.74244	3.81659
chr1	10867993	10868993	p300_187:::chr1:::10868493	175.893	127.343	0.723978	-0.465982	0.0128793	0.0652513	5.32177	1.20262	0.778896	7.03648	0.325863	1.39122	3.07446	2.99236	0.0796398	0.113873	19.0205	7.38383	4.98447
chr1	10869684	10870684	p300_188:::chr1:::10870184	207.18	90.9287	0.438888	-1.18807	8.11894e-10	3.99032e-08	4.96168	2.08882	0.956619	3.75471	0.235999	1.49406	2.35923	3.50829	0.128649	0.170809	6.86127	4.94421	3.57842
chr1	11320031	11321031	p300_200:::chr1:::11320531	86.3396	107.175	1.24132	0.31188	0.368913	0.701993	3.18419	4.73421	1.75134	3.07529	0.501452	1.82272	0.581189	1.45491	0.0796398	0.0284681	21.4907	12.0711	6.15946
chr1	12015592	12016592	DHS_1133:::chr1:::12016092	0.637958	1.19934	1.87997	0.910706	0.970259	1	3.61079	0.502926	0.357023	1.46052	0.495101	0.28855	3.14689	0.0103185	0	0	1.74506	4.84786	2.08446
chr1	12050474	12051474	DHS_1137:::chr1:::12050974	3.02306	5.63095	1.86267	0.897369	0.519268	0.850774	2.50986	0.627302	0.647041	1.58816	0.583234	0.441889	2.52396	0.0515925	0	0	1.20923	1.42771	2.23886
chr1	12562573	12563573	DHS_1157:::chr1:::12563073	1.22034	0.416796	0.341541	-1.54987	0.820789	1	2.10664	0.630093	0.359956	1.53387	0.479159	0.409713	1.98497	0.020637	0	0	1.12118	0.8825	1.80798
chr1	12566704	12567704	DHS_1159:::chr1:::12567204	22.7152	41.424	1.82363	0.866809	0.0304901	0.126251	4.18038	2.05564	0.636098	2.07554	0.518418	1.01841	0.485283	0.381784	0.00612614	0	0.792523	2.3764	2.90761
chr1	12626536	12627536	p300_220:::chr1:::12627036	1.91387	7.74045	4.04439	2.01592	0.097373	0.296241	4.94273	1.30945	0.607794	1.47629	0.832188	0.638594	0.749716	0.0309555	0	0	3.59698	2.60771	3.39203
chr1	12673597	12674597	DHS_1180:::chr1:::12674097	0.637958	1.25039	1.95999	0.970844	0.966902	1	1.96116	0.610409	0.539672	0.772696	0.923644	0.708774	0.958589	0.0103185	0.00612614	0	0.302573	0.661554	1.86734
chr1	12679314	12680314	DHS_1181:::chr1:::12679814	4.93693	16.8673	3.41656	1.77254	0.0173556	0.0822276	3.80674	1.0656	0.569141	1.05326	1.32351	0.939685	0.641862	0.0825479	0.0183784	0.0284681	1.6208	0.930237	1.21002
chr1	12987471	12988471	p300_244:::chr1:::12987971	33.6983	48.2459	1.4317	0.517733	0.148209	0.395082	1.90447	2.10877	1.07243	0.992326	1.59656	1.4666	0.794449	0.567517	0.00612614	0	4.26297	3.08834	1.74803
chr1	13016319	13017319	DHS_1283:::chr1:::13016819	6.04612	18.6111	3.07819	1.62208	0.0213273	0.0963751	1.88445	0.939073	0.84612	0.852222	0.667017	0.646543	0.625099	0.103185	0.00612614	0	1.91671	2.26301	1.3737
chr1	13021319	13022319	DHS_1287:::chr1:::13021819	0.582381	7.34918	12.6192	3.65755	0.0283828	0.119707	2.0634	1.05101	0.650446	1.0362	0.884879	1.23539	0.914871	0.0103185	0	0	1.40261	0.736012	0.726013
chr1	13047559	13048559	p300_249:::chr1:::13048059	33.2536	50.8572	1.52937	0.612939	0.0897577	0.278797	2.6957	2.80268	1.18706	1.18076	0.630833	1.69143	1.03075	0.567517	0.00612614	0	4.68005	4.78408	3.44856
chr1	13049393	13050393	p300_250:::chr1:::13049893	10.8719	13.6861	1.25885	0.332107	0.678259	0.958918	3.47226	1.12366	0.576199	1.47321	0.680111	0.981162	1.25944	0.185733	0	0.0142341	3.78751	6.04035	2.48385
chr1	13064331	13065331	p300_254:::chr1:::13064831	312.934	347.971	1.11196	0.15311	0.261673	0.573612	5.59033	4.20917	1.35297	4.90488	0.714265	2.71576	0.316489	5.29339	0.343064	0.398554	21.4358	18.9122	6.22093
chr1	13068006	13069006	DHS_1307:::chr1:::13068506	342.362	328.033	0.958146	-0.061682	0.699064	0.976793	5.5372	3.03781	1.38929	3.27641	0.714512	2.15686	0.332207	5.77836	0.18991	0.441256	3.72022	7.42228	4.90668
chr1	13070716	13071716	DHS_1308:::chr1:::13071216	97.3782	181.798	1.86693	0.900666	5.61627e-06	9.82292e-05	4.67184	2.29498	1.00158	2.10941	0.449372	2.24736	0.313359	1.64064	0.226667	0.298915	3.74364	3.41282	1.55375
chr1	13084305	13085305	p300_258:::chr1:::13084805	478.508	660.072	1.37944	0.464079	5.30653e-05	0.000683447	4.92077	4.33077	1.47764	8.25271	0.345955	5.30277	0.233927	8.12065	0.085766	0.427022	18.0037	9.31558	3.68418
chr1	13091162	13092162	DHS_1321:::chr1:::13091662	31.3398	70.1316	2.23778	1.16207	0.0295572	0.123181	5.43731	1.49639	0.479011	1.45742	0.765169	1.7615	0.542202	0.536562	0.00612614	0.0711703	2.05898	2.23133	3.1545
chr1	13093695	13094695	p300_261:::chr1:::13094195	458.512	539.585	1.17682	0.234892	0.0514126	0.186655	3.66864	7.1848	3.94163	4.70886	0.51062	6.49237	0.221807	7.78014	0.18991	0.270447	11.1943	9.70586	7.10845
chr1	13098297	13099297	p300_262:::chr1:::13098797	19.3587	40.2757	2.0805	1.05693	0.0136558	0.068135	4.37032	0.683466	0.441374	1.3824	0.610622	1.73903	0.528424	0.330192	0.0183784	0.0142341	5.98031	3.3816	1.78586
chr1	13121764	13122764	p300_268:::chr1:::13122264	36.6924	38.6596	1.05361	0.0753476	0.9252	1	4.22696	1.24267	0.501562	1.27212	0.993477	1.60201	0.510082	0.629428	0	0	5.84908	9.44389	4.34429
chr1	13124035	13125035	p300_269:::chr1:::13124535	9.18033	28.6481	3.1206	1.64182	0.00300438	0.0203424	2.44168	1.27857	0.706717	1.24167	0.889064	1.38986	0.82677	0.154777	0.0122523	0	4.3348	2.39905	3.96433
chr1	13416806	13417806	p300_279:::chr1:::13417306	43.212	66.3636	1.53577	0.618959	0.102393	0.306444	1.63444	6.46798	5.65459	0.924085	1.88456	3.3891	0.588789	0.722294	0.0122523	0	2.61468	1.33393	3.81727
chr1	13445373	13446373	p300_280:::chr1:::13445873	1.22034	0.391271	0.320625	-1.64104	0.820371	1	2.80341	0.53557	0.307778	1.02905	0.432214	0.572125	1.55019	0.020637	0	0	2.38928	1.97351	0.792773
chr1	13455003	13456003	p300_281:::chr1:::13455503	4.35455	9.30554	2.13697	1.09557	0.251685	0.560713	2.30329	0.823349	0.301426	1.11198	0.560108	0.927481	1.7022	0.0722294	0.0122523	0	3.94328	1.16129	1.87448
chr1	13457665	13458665	DHS_1426:::chr1:::13458165	0.582381	2.05846	3.53455	1.82153	0.641961	0.934186	2.38467	0.51959	0.443237	0.946599	0.505731	0.602667	1.32578	0.0103185	0	0	0.779624	1.27845	1.04766
chr1	13484485	13485485	p300_283:::chr1:::13484985	29.8149	43.0402	1.44358	0.529648	0.164265	0.421979	2.99248	2.69609	1.84419	1.37169	1.78175	1.4092	1.30129	0.505606	0.0122523	0	3.75987	3.0534	3.36836
chr1	13486174	13487174	p300_284:::chr1:::13486674	24.4068	38.8383	1.59129	0.670198	0.103272	0.308116	1.94082	1.64388	0.775532	2.4306	1.26737	0.683407	0.923584	0.41274	0	0	4.11433	2.57604	7.53936
chr1	13515182	13516182	p300_289:::chr1:::13515682	3.02306	2.81547	0.931333	-0.102631	1	1	1.56541	1.0932	0.586351	1.28006	0.509488	0.995181	2.39561	0.0515925	0.00612614	0	4.04608	1.65871	2.91995
chr1	13521283	13522283	p300_290:::chr1:::13521783	3.60544	16.3739	4.54146	2.18315	0.026274	0.112903	1.56233	1.33838	0.527764	0.843356	0.908283	1.548	0.459529	0.061911	0.0122523	0.0142341	3.53432	3.66609	3.43629
chr1	13524678	13525678	p300_291:::chr1:::13525178	29.8705	48.9264	1.63795	0.71189	0.0524988	0.189518	1.98681	1.99459	0.904279	1.04592	0.442191	0.859617	0.809859	0.505606	0.0367568	0	7.24277	6.0176	4.42185
chr1	13589641	13590641	p300_295:::chr1:::13590141	15.1709	25.8071	1.7011	0.766465	0.141467	0.38349	2.02747	2.46642	1.08505	2.04069	0.642098	0.927481	0.903124	0.257962	0.0183784	0	2.47461	3.87757	2.4222
chr1	13596336	13597336	p300_296:::chr1:::13596836	31.1464	81.7169	2.62364	1.39157	9.37217e-06	0.000153332	2.66561	1.61708	0.802952	2.169	0.382399	1.61392	2.30411	0.526243	0.0183784	0	5.54574	4.87868	3.19528
chr1	13597689	13598689	DHS_1458:::chr1:::13598189	14.5329	25.4158	1.74885	0.806404	0.128577	0.358694	2.38203	0.84755	0.594896	1.57007	0.599948	1.02829	1.22979	0.247644	0	0	2.08011	2.63471	1.54221
chr1	13604583	13605583	DHS_1459:::chr1:::13605083	114.378	96.3726	0.842577	-0.247119	0.274218	0.586678	1.79374	0.975054	0.651717	1.27132	0.589376	0.887629	2.12691	1.93988	0.0122523	0.0427022	1.98484	2.36712	1.50875
chr1	13778993	13779993	p300_300:::chr1:::13779493	5.46374	14.911	2.72908	1.44841	0.0609706	0.211702	1.78099	1.42801	0.812495	0.765344	0.931932	1.23557	0.476595	0.0928664	0	0.0142341	3.43648	2.30651	6.49141
chr1	13836226	13837226	p300_302:::chr1:::13836726	7.90441	4.8484	0.613379	-0.705148	0.49201	0.825206	1.933	2.14722	1.39531	0.879131	1.27364	1.12569	0.833081	0.13414	0.00612614	0	7.17105	5.00913	3.78229
chr1	13928158	13929158	p300_305:::chr1:::13928658	1.80272	1.22486	0.679453	-0.557554	0.948599	1	2.95559	0.364515	0.2354	0.692141	0.456603	0.216412	1.04532	0.0309555	0	0.0142341	2.19965	2.16423	0.853929
chr1	13990904	13991904	p300_307:::chr1:::13991404	1.22034	1.61613	1.32433	0.405266	1	1	2.66756	1.2609	0.299435	1.28061	0.689519	0.543414	0.967034	0.020637	0	0	4.06985	6.13992	1.82303
chr1	14302320	14303320	p300_315:::chr1:::14302820	16.3356	44.886	2.74774	1.45824	0.000722134	0.00621484	5.19972	1.21551	0.564192	1.75848	0.662132	0.649237	0.785994	0.278599	0.0245046	0.0142341	7.43101	5.79636	4.43815
chr1	14454494	14455494	DHS_1578:::chr1:::14454994	15.5043	39.9866	2.57906	1.36684	0.00191099	0.0140049	2.79148	0.938265	0.460156	0.974824	0.772553	1.31229	1.03027	0.257962	0.00612614	0	2.70277	1.28933	2.7882
chr1	14498023	14499023	p300_319:::chr1:::14498523	16.2801	20.2017	1.24089	0.31137	0.623197	0.933728	2.36462	1.43096	0.776137	0.931142	3.50821	0.784103	1.32039	0.278599	0.0122523	0.0142341	2.23153	0.439118	1.39942
chr1	14618483	14619483	DHS_1595:::chr1:::14618983	6.04612	8.93979	1.4786	0.564232	0.587791	0.905284	2.23239	0.920235	0.484088	0.815426	0.409383	0.568456	1.41822	0.103185	0	0	2.34157	2.37367	1.52563
chr1	14621746	14622746	p300_323:::chr1:::14622246	78.7663	64.7136	0.82159	-0.283509	0.455716	0.793575	1.98537	2.91353	1.45871	2.47602	0.411471	0.36187	0.515099	1.3414	0.00612614	0	20.5974	7.35127	0.045227
chr1	14625649	14626649	DHS_1596:::chr1:::14626149	8.48679	6.80476	0.801806	-0.318675	0.777438	1	2.01845	0.610167	0.386203	0.737281	0.3584	0.70334	0.520097	0.144459	0	0	0.673644	0.883725	0.689712
chr1	14640145	14641145	p300_324:::chr1:::14640645	56.08	48.5606	0.865917	-0.2077	0.52107	0.851399	4.22282	1.31376	1.07324	4.55673	0.423029	0.683407	2.77511	0.949301	0.0183784	0.0142341	7.41515	5.10302	4.28348
chr1	14729794	14730794	DHS_1609:::chr1:::14730294	50.783	57.3217	1.12876	0.174737	0.577713	0.896388	1.99239	2.81238	1.89254	0.874477	0.478704	1.62908	0.563841	0.856435	0.00612614	0.0142341	3.40906	4.3604	3.81759
chr1	15758163	15759163	DHS_1685:::chr1:::15758663	2.55183	10.0115	3.92326	1.97205	0.0524182	0.189354	2.94694	1.55759	0.469622	0.834181	0.778373	1.06475	0.51651	0.041274	0.0122523	0	0.646698	1.93915	1.60013
chr1	15760398	15761398	DHS_1688:::chr1:::15760898	0	1.22486	Inf	Inf	0.6354	0.933728	2.15474	0.80168	0.405936	0.980222	0.669024	0.450201	1.1389	0	0	0	1.01152	0.663485	1.30894
chr1	15781296	15782296	p300_338:::chr1:::15781796	336.811	497.736	1.47779	0.56344	1.10975e-05	0.000177627	4.41357	4.43758	1.42598	9.04722	0.309337	2.38608	0.778689	5.71644	0.085766	0.0854044	9.08063	11.7398	7.19187
chr1	16782619	16783619	DHS_1844:::chr1:::16783119	0.637958	2.05846	3.22663	1.69003	0.637258	0.933728	3.85749	0.650845	0.439413	0.842607	0.576573	0.375115	1.39649	0.0103185	0	0	1.53976	2.28927	1.65531
chr1	16932185	16933185	DHS_1866:::chr1:::16932685	1.22034	10.8961	8.92879	3.15846	0.00816405	0.0454718	3.52278	2.32345	0.854989	1.01351	0.407953	0.775818	1.70546	0.020637	0.00612614	0	2.46942	0.952804	2.68944
chr1	17225216	17226216	DHS_1900:::chr1:::17225716	16.3912	24.2165	1.47741	0.563068	0.289289	0.60688	5.55844	1.28397	0.690068	2.00493	0.508207	0.889817	1.47481	0.278599	0	0	2.57929	5.5369	3.85118
chr1	17240438	17241438	p300_374:::chr1:::17240938	24.4068	47.2847	1.93736	0.954092	0.0134146	0.0671981	6.01283	3.09865	0.757608	5.22997	0.394395	0.920374	0.750358	0.41274	0.0367568	0.0142341	32.0341	12.5376	7.55776
chr1	17678294	17679294	DHS_1943:::chr1:::17678794	2.55183	23.8508	9.34652	3.22443	2.68185e-05	0.000380475	6.58192	0.806206	0.191902	1.64858	0.402885	0.524229	1.44366	0.041274	0.0245046	0.0142341	1.57801	3.38748	2.57036
chr1	18277040	18278040	p300_389:::chr1:::18277540	0.582381	2.05846	3.53455	1.82153	0.641961	0.934186	8.27882	1.12673	0.482753	1.41532	0.448	0.473402	0.818256	0.0103185	0	0	4.33057	3.62959	3.08934
chr1	18278650	18279650	DHS_1997:::chr1:::18279150	0	1.64166	Inf	Inf	0.474394	0.811819	3.84328	0.657897	0.467036	0.973652	0.4673	0.490702	0.650643	0	0	0	1.07425	1.40926	1.76438
chr1	18629127	18630127	p300_391:::chr1:::18629627	3.13421	1.59061	0.507499	-0.978523	0.684423	0.963458	3.38321	0.775316	0.596858	0.807897	1.346	0.663992	0.623627	0.0515925	0	0	5.24918	3.09878	1.25402
chr1	18820857	18821857	DHS_2021:::chr1:::18821357	0.582381	4.45713	7.65329	2.93608	0.16415	0.421753	4.94385	0.899509	0.459268	1.77204	0.638355	0.570276	0.727069	0.0103185	0	0	1.71662	5.32282	3.72817
chr1	19086598	19087598	DHS_2030:::chr1:::19087098	2.44068	1.17381	0.480938	-1.05608	0.720149	0.993892	2.65082	2.12751	1.7208	0.959932	4.79254	1.10946	2.26109	0.041274	0	0	2.63123	2.10943	1.74611
chr1	19334200	19335200	DHS_2069:::chr1:::19334700	1.8583	10.8961	5.86351	2.55177	0.0183866	0.0860768	1.98497	0.441655	0.439283	0.733787	0.501219	0.307695	1.12196	0.0309555	0.00612614	0	1.64192	1.29238	1.37289
chr1	19965137	19966137	DHS_2083:::chr1:::19965637	0	0	NA	NA	NA	NA	2.95216	0.566018	0.588499	1.03176	0.95925	0.485824	2.37173	0	0	0	1.57118	0.206117	1.78293
chr1	20751242	20752242	p300_406:::chr1:::20751742	10.5118	21.5031	2.04561	1.03253	0.0775312	0.252038	5.41431	2.12832	0.689529	1.43749	0.514413	1.69972	0.452593	0.175414	0	0	12.8864	8.58259	1.89449
chr1	20776823	20777823	p300_410:::chr1:::20777323	77.1013	184.52	2.39322	1.25895	6.93198e-06	0.000117981	2.85457	3.21886	2.27775	1.86819	1.02927	2.15623	0.502686	1.32077	0.110271	0.0569363	4.63613	4.20207	2.56754
chr1	20857207	20858207	p300_412:::chr1:::20857707	78.3506	96.6363	1.23338	0.30262	0.224327	0.518364	4.17814	3.43492	1.09893	3.06765	0.476884	1.77925	0.389014	1.33109	0	0	20.5376	9.01024	6.27377
chr1	21086945	21087945	p300_436:::chr1:::21087445	0	0.782542	Inf	Inf	0.849188	1	1.80865	1.03782	0.465104	0.532292	0.980497	0.954076	0.987355	0	0.00612614	0	5.38088	2.49778	1.82934
chr1	21156033	21157033	p300_438:::chr1:::21156533	37.6638	48.1438	1.27825	0.354173	0.329785	0.659646	1.78099	5.39928	4.51486	1.16413	1.51051	2.63313	0.473068	0.639747	0.147027	0.0427022	3.6468	4.78408	7.81531
chr1	21196038	21197038	p300_439:::chr1:::21196538	26.8475	70.591	2.62934	1.3947	3.48443e-05	0.000476836	1.58186	1.01202	0.60049	1.68389	0.534864	0.793738	1.42351	0.454014	0.00612614	0.0142341	1.88246	2.56451	3.84855
chr1	21261213	21262213	p300_447:::chr1:::21261713	32.0889	65.2748	2.03419	1.02445	0.00214855	0.0154582	2.33716	5.23167	3.25223	0.97565	1.00933	3.05255	0.354912	0.54688	0.0122523	0.0142341	3.6468	2.23257	4.35608
chr1	23169302	23170302	DHS_2349:::chr1:::23169802	0	0	NA	NA	NA	NA	3.29359	0.418514	0.25901	0.47302	0.861257	0.388765	0.515479	0	0	0	1.38302	0.90716	2.14761
chr1	23941784	23942784	p300_478:::chr1:::23942284	16.9736	61.3621	3.61515	1.85406	1.92823e-06	3.86364e-05	2.5454	2.7244	1.06633	2.33488	0.69257	1.72364	1.68551	0.288918	0.0245046	0	3.88346	4.15608	3.78426
chr1	23955838	23956838	p300_479:::chr1:::23956338	15.7533	88.6748	5.62899	2.49287	3.05929e-12	2.53772e-10	2.5032	1.12687	0.364916	1.34353	0.46078	1.07354	1.3472	0.268281	0.0122523	0	4.00095	2.62434	2.44386
chr1	23968943	23969943	DHS_2429:::chr1:::23969443	8.59795	50.0491	5.82105	2.54128	8.89092e-08	2.58533e-06	2.68585	0.840993	0.930208	1.03627	1.02346	1.04716	0.578528	0.144459	0	0.0142341	0.869218	1.79189	1.33493
chr1	23974890	23975890	p300_482:::chr1:::23975390	210.923	279.319	1.32427	0.405198	0.0093802	0.0508404	1.9617	6.76216	4.4418	2.51082	0.306843	2.63504	0.536716	3.58052	0.26955	0	10.3905	10.4454	3.64249
chr1	24170595	24171595	DHS_2460:::chr1:::24171095	0	7.24708	Inf	Inf	0.0077992	0.0438815	3.57198	0.673116	0.624867	1.02959	1.14867	0.510636	1.31787	0	0	0	0.778529	1.19154	2.24738
chr1	24833108	24834108	DHS_2526:::chr1:::24833608	1.80272	9.72233	5.39315	2.43113	0.0353222	0.140861	2.9263	0.744662	0.620746	1.16868	0.37345	0.326101	1.27752	0.0309555	0	0	1.26555	1.52188	1.76365
chr1	26286226	26287226	p300_507:::chr1:::26286726	53.3348	63.3523	1.18782	0.24832	0.519126	0.850774	4.9681	2.1616	0.700739	1.71019	0.523335	1.07091	0.998409	0.897709	0.00612614	0.0142341	4.16687	7.34052	4.62178
chr1	26445040	26446040	DHS_2612:::chr1:::26445540	0.582381	4.01481	6.89379	2.7853	0.209993	0.495469	5.14318	1.42941	0.950652	1.37734	1.22932	0.915591	0.551827	0.0103185	0	0	1.62859	0.194225	2.47589
chr1	26584301	26585301	p300_509:::chr1:::26584801	0	0.391271	Inf	Inf	1	1	3.94229	0.520029	0.231722	0.473966	0.925376	0.0811546	0.618736	0	0	0	4.90798	3.40866	1.98292
chr1	26964456	26965456	p300_511:::chr1:::26964956	0	2.08398	Inf	Inf	0.535645	0.857798	6.45185	1.046	0.662062	0.812514	1.46046	0.324618	0.830106	0	0	0	5.77409	2.38065	2.95591
chr1	27116042	27117042	DHS_2635:::chr1:::27116542	1.22034	3.62354	2.96929	1.57012	0.438315	0.778501	4.33013	0.607169	0.208758	0.576446	0.40969	0.350939	0.916107	0.020637	0	0	2.49691	2.45669	1.58447
chr1	28731862	28732862	DHS_2689:::chr1:::28732362	3.60544	9.77338	2.71073	1.43868	0.155257	0.407774	3.44055	0.731192	0.421312	1.55595	0.54481	0.6394	0.880415	0.061911	0	0	2.79956	1.60677	2.09004
chr1	30471635	30472635	DHS_2745:::chr1:::30472135	0.637958	1.22486	1.91998	0.941088	0.968565	1	2.11692	0.909163	0.45214	1.20226	0.515889	0.12668	4.23076	0.0103185	0	0	1.68998	2.21701	1.54765
chr1	30572616	30573616	DHS_2749:::chr1:::30573116	0	1.25039	Inf	Inf	0.666484	0.949084	1.87666	0.7289	0.459613	0.692017	0.547724	0.617043	1.24503	0	0	0	1.24071	1.50244	1.36802
chr1	30835197	30836197	DHS_2782:::chr1:::30835697	0	0	NA	NA	NA	NA	3.3204	1.10939	0.454749	0.889114	0.683683	1.06801	0.29813	0	0	0	1.19981	0.786991	2.3289
chr1	30836802	30837802	DHS_2784:::chr1:::30837302	0.582381	2.89205	4.96591	2.31206	0.477011	0.811819	1.72733	0.857648	0.332728	0.899321	0.715895	0.574325	0.339374	0.0103185	0	0	1.51015	2.09763	2.65274
chr1	30932403	30933403	p300_518:::chr1:::30932903	163.774	203.106	1.24016	0.310522	0.0809119	0.259522	4.00155	2.28945	0.865881	3.74343	0.287408	2.39846	0.856738	2.77567	0.116397	0.156575	11.916	6.17562	4.08556
chr1	30953614	30954614	DHS_2823:::chr1:::30954114	0.582381	6.88134	11.8159	3.56265	0.0372137	0.146469	3.61799	0.455271	0.466358	0.894276	0.432341	0.48999	1.17758	0.0103185	0.0122523	0	0.762616	1.00044	0.780806
chr1	30965573	30966573	p300_521:::chr1:::30966073	6.15727	5.70752	0.926956	-0.109427	1	1	2.71171	1.46191	0.404249	3.13025	0.355819	0.66744	0.643626	0.103185	0.0122523	0	7.55489	3.39804	3.80309
chr1	30978814	30979814	p300_522:::chr1:::30979314	1.8583	2.44973	1.31826	0.39864	0.978498	1	2.51165	1.32525	0.531247	1.31538	0.370071	0.675676	1.78208	0.0309555	0.00612614	0	3.44878	2.74201	1.8101
chr1	30985958	30986958	DHS_2831:::chr1:::30986458	1.16476	11.6532	10.0048	3.32261	0.00516449	0.0315056	2.78245	1.47747	0.606374	1.09263	0.803887	1.12251	0.57323	0.020637	0.00612614	0	1.51098	1.13268	2.12715
chr1	31290248	31291248	p300_525:::chr1:::31290748	4.93693	2.4242	0.491034	-1.0261	0.48977	0.822493	3.64847	0.742257	0.489005	1.67082	0.684759	0.653908	0.766404	0.0825479	0	0	9.05577	5.77646	2.92755
chr1	33162918	33163918	p300_531:::chr1:::33163418	76.6035	87.6625	1.14437	0.194551	0.463469	0.802384	4.53899	2.94352	1.11785	2.17532	0.588131	0.750374	1.41673	1.30013	0.0122523	0.0142341	5.10674	10.5057	5.96133
chr1	33328012	33329012	p300_532:::chr1:::33328512	21.4393	65.9807	3.07756	1.62179	6.22746e-06	0.000107484	4.26981	3.0356	1.18832	2.56949	0.883247	1.71227	0.815916	0.361147	0.042883	0.0142341	8.88322	6.82563	7.20029
chr1	33746516	33747516	DHS_3012:::chr1:::33747016	19.0542	14.5452	0.76336	-0.389564	0.530733	0.855336	2.25565	2.05519	0.854273	1.12121	1.70901	0.747969	0.54547	0.319873	0.0551353	0.0427022	1.70296	1.67553	3.87764
chr1	33771314	33772314	p300_541:::chr1:::33771814	77.0481	59.9246	0.777756	-0.36261	0.193339	0.473177	2.25135	3.39219	1.80624	1.67711	0.759283	1.64806	0.322819	1.30013	0.042883	0.0284681	3.64212	8.15747	2.06914
chr1	33887232	33888232	p300_550:::chr1:::33887732	2.32952	5.13758	2.20542	1.14105	0.632578	0.933728	2.86712	0.620253	0.308962	1.22082	0.506353	0.501683	3.57057	0.041274	0	0	4.61927	3.85626	2.75885
chr1	34413928	34414928	DHS_3244:::chr1:::34414428	0.637958	15.7446	24.6796	4.62525	0.000108172	0.00125521	3.30839	0.92572	0.368299	1.25554	0.420228	0.429958	0.726877	0.0103185	0.00612614	0	3.21208	4.41445	1.46164
chr1	34451614	34452614	DHS_3249:::chr1:::34452114	4.35455	16.4505	3.77778	1.91754	0.01261	0.0641988	2.87108	1.3657	0.639232	0.991516	0.894682	0.895499	0.675322	0.0722294	0.00612614	0.0142341	1.51321	1.67168	1.14159
chr1	34458673	34459673	p300_602:::chr1:::34459173	20.219	21.5881	1.06772	0.0945274	0.874823	1	1.63659	1.04568	0.39664	0.939393	0.566897	0.767679	0.697987	0.34051	0.0122523	0.0142341	2.41888	2.66141	0.65243
chr1	34567602	34568602	p300_614:::chr1:::34568102	9.23591	26.9299	2.91578	1.54388	0.0057	0.0341788	1.64587	4.77159	3.27788	1.25712	0.56606	1.88488	0.370258	0.154777	0.0122523	0	3.72522	2.38918	3.51036
chr1	34573191	34574191	DHS_3291:::chr1:::34573691	14.9219	55.578	3.72458	1.89708	2.76525e-06	5.29933e-05	2.10816	3.18027	1.53794	1.16561	0.802188	1.18305	1.64518	0.247644	0.0490091	0	2.66891	3.36657	4.35285
chr1	34628350	34629350	DHS_3306:::chr1:::34628850	3.13421	17.3096	5.5228	2.4654	0.00246939	0.0173239	2.29001	0.788606	0.620406	0.850221	0.855119	0.860435	1.0631	0.0515925	0.00612614	0	1.11308	2.55535	1.27417
chr1	34629795	34630795	DHS_3308:::chr1:::34630295	1.8583	20.644	11.1091	3.47367	6.45202e-05	0.000806635	2.08959	1.01165	0.381099	1.04398	0.819968	1.02963	0.758458	0.0309555	0	0	1.11921	0.800859	2.12687
chr1	34796105	34797105	p300_623:::chr1:::34796605	13.4237	13.6606	1.01764	0.0252325	1	1	2.17349	1.63402	0.874772	1.08498	0.645586	0.821324	0.531549	0.227007	0.0735137	0.0569363	3.33923	4.10681	1.66196
chr1	34940371	34941371	p300_633:::chr1:::34940871	9.65156	15.2767	1.58282	0.6625	0.347434	0.680924	1.70095	0.934883	0.509151	0.792902	0.654876	0.559268	2.41006	0.165096	0.0122523	0	4.06565	1.92916	1.23993
chr1	35018767	35019767	p300_637:::chr1:::35019267	1.16476	8.02962	6.89379	2.7853	0.0431265	0.164045	1.7244	0.993667	0.822417	0.863824	0.791277	0.6072	1.52507	0.020637	0	0	2.65858	2.07081	0.942772
chr1	35052583	35053583	DHS_3400:::chr1:::35053083	0	1.61613	Inf	Inf	0.477961	0.811819	2.15009	0.839281	0.617924	1.12653	0.594693	0.479871	1.24449	0	0	0	2.00838	1.05388	1.61932
chr1	35268870	35269870	DHS_3418:::chr1:::35269370	0.582381	4.48266	7.69712	2.94432	0.163234	0.420466	1.82922	1.01232	0.695165	0.829441	0.634544	0.838598	2.14316	0.0103185	0	0	2.2134	1.38871	2.01166
chr1	35270449	35271449	DHS_3419:::chr1:::35270949	2.44068	4.79735	1.96558	0.974957	0.526381	0.854358	2.00361	0.893226	0.749687	0.627308	0.653207	0.95476	2.10465	0.041274	0.00612614	0	1.18878	1.33673	1.31857
chr1	35277372	35278372	p300_640:::chr1:::35277872	1.16476	14.4942	12.4439	3.63737	0.000914117	0.0075684	3.17636	0.965768	0.579304	3.94972	0.40918	1.30427	7.26342	0.020637	0.00612614	0.0284681	6.49585	2.16423	4.24912
chr1	35289182	35290182	p300_641:::chr1:::35289682	10.4562	10.9727	1.04939	0.0695567	0.995391	1	5.37481	1.35168	0.686582	3.13556	0.491643	1.194	3.05091	0.175414	0	0.0142341	16.1055	13.5824	7.50491
chr1	35294603	35295603	DHS_3427:::chr1:::35295103	1.80272	5.21415	2.89238	1.53226	0.31681	0.643267	5.65167	0.565791	0.463443	0.884737	0.549938	0.422004	2.15213	0.0309555	0	0	1.50126	1.21197	1.4484
chr1	35314019	35315019	DHS_3432:::chr1:::35314519	0.582381	2.78995	4.79059	2.2602	0.419837	0.75744	1.93526	0.858886	0.797321	0.872053	1.4758	0.837725	1.02592	0.0103185	0	0	1.15896	0.868793	1.82934
chr1	35750889	35751889	DHS_3474:::chr1:::35751389	1.16476	0.416796	0.357838	-1.48262	0.819866	1	3.33696	1.06019	0.697656	0.764462	1.5295	0.575936	1.05871	0.020637	0	0	0.745044	1.46609	1.16806
chr1	35754343	35755343	p300_645:::chr1:::35754843	1.91387	2.81547	1.47109	0.556882	0.84502	1	4.29364	2.01443	0.921466	1.45516	1.2864	0.768833	0.453079	0.0309555	0	0	10.8391	5.44853	3.81157
chr1	35806803	35807803	p300_648:::chr1:::35807303	1.80272	5.31625	2.94902	1.56023	0.312964	0.638731	3.5323	1.57049	0.868956	0.997304	1.25587	1.11588	0.726342	0.0309555	0	0	5.55756	3.88208	2.84506
chr1	35819907	35820907	DHS_3483:::chr1:::35820407	5.63047	12.4612	2.21318	1.14612	0.147978	0.394609	1.53103	2.88511	1.83655	0.899998	0.724694	1.02511	1.04608	0.0928664	0	0	2.21668	2.90797	3.45924
chr1	35870381	35871381	DHS_3495:::chr1:::35870881	2.3851	18.8747	7.91359	2.98433	0.000478586	0.00440178	2.24948	1.41682	0.794119	1.05326	0.696554	1.30369	0.795163	0.041274	0	0	3.24648	2.79872	2.49294
chr1	35878925	35879925	p300_651:::chr1:::35879425	31.0353	25.3137	0.815644	-0.293988	0.520611	0.851123	2.65344	4.38026	2.29139	1.56548	1.26009	1.85496	0.627976	0.526243	0.0980183	0	7.44138	5.1573	3.35422
chr1	35880667	35881667	p300_652:::chr1:::35881167	17.7227	18.1177	1.02229	0.0318016	1	1	2.43552	2.74024	1.07211	0.936968	1.62806	1.57701	0.549912	0.299236	0	0	3.42438	1.72046	6.17912
chr1	35882212	35883212	p300_653:::chr1:::35882712	41.4915	49.9215	1.20317	0.266845	0.433262	0.773517	2.3145	3.99382	1.91145	2.07281	0.973907	2.38919	0.413208	0.701657	0.0306307	0	4.86564	2.58553	3.56811
chr1	35898153	35899153	p300_655:::chr1:::35898653	15.2264	33.7518	2.21665	1.14838	0.0259707	0.111895	2.71835	1.05101	0.478269	1.19348	0.397272	0.864309	1.02609	0.257962	0.0306307	0.0142341	6.65004	7.22302	2.09262
chr1	35907107	35908107	p300_657:::chr1:::35907607	113.38	158.517	1.3981	0.483469	0.0155522	0.075531	2.12701	2.26394	0.934071	2.75562	0.434507	2.11379	0.700692	1.91924	0.0612614	0.0284681	5.90837	5.0205	3.16786
chr1	35914881	35915881	p300_660:::chr1:::35915381	1.22034	9.28001	7.60446	2.92685	0.0211152	0.0956275	2.48484	0.85726	0.374499	0.873726	0.496739	0.590215	0.611399	0.020637	0.00612614	0	2.5371	2.52493	1.61978
chr1	35926250	35927250	DHS_3512:::chr1:::35926750	35.1675	69.1025	1.96495	0.974495	0.00253698	0.0177089	2.3234	2.8972	1.15583	1.26164	0.59853	1.35452	0.905751	0.598473	0.0183784	0.0427022	3.07398	6.97535	3.07641
chr1	35934935	35935935	p300_662:::chr1:::35935435	12.8413	61.4981	4.78907	2.25975	3.64088e-08	1.17459e-06	2.45879	1.5369	0.610052	2.10316	0.458057	0.909759	0.993816	0.216688	0.0122523	0.0284681	5.00176	3.08781	2.41619
chr1	35973145	35974145	DHS_3528:::chr1:::35973645	4.29897	18.8747	4.39052	2.13439	0.00407576	0.0260595	1.89612	1.00854	0.430674	0.947933	0.448667	0.708259	0.560857	0.0722294	0.0122523	0	1.81971	1.46905	1.08682
chr1	35974729	35975729	DHS_3532:::chr1:::35975229	33.9472	80.7302	2.37811	1.24982	5.82286e-05	0.000739047	1.92979	2.99279	1.48493	1.42067	0.411734	1.29176	0.717375	0.577836	0.00612614	0.0142341	2.92435	2.11389	2.81588
chr1	35987643	35988643	p300_666:::chr1:::35988143	2.96748	4.43161	1.49339	0.578591	0.777636	1	2.1542	0.973153	0.397495	1.21956	0.445294	0.816292	0.503421	0.0515925	0.0122523	0.0142341	11.7508	3.89814	2.0167
chr1	35996739	35997739	DHS_3540:::chr1:::35997239	1.80272	2.86652	1.59011	0.669127	0.847843	1	1.81547	0.848546	0.647682	1.07414	0.591202	0.846031	0.938888	0.0309555	0.00612614	0	2.09372	1.11583	1.40678
chr1	35998027	35999027	p300_667:::chr1:::35998527	12.2034	10.5559	0.865	-0.209229	0.815462	1	2.65928	1.48014	0.651282	1.08033	0.579988	1.1516	0.663895	0.20637	0.0122523	0.0284681	4.45303	4.20605	2.02126
chr1	36000929	36001929	p300_669:::chr1:::36001429	35.4454	34.3812	0.969975	-0.0439806	0.95649	1	4.20916	3.99222	1.08434	3.33447	0.386421	1.6387	0.372483	0.598473	0.0122523	0.0142341	14.4352	12.6004	7.29503
chr1	36018600	36019600	p300_671:::chr1:::36019100	12.6746	25.0246	1.97438	0.981403	0.0740757	0.243733	1.92068	2.1305	0.812495	1.86963	0.678213	1.37036	0.945744	0.216688	0.0245046	0	2.55738	2.41135	3.81848
chr1	36027750	36028750	p300_673:::chr1:::36028250	1.27592	9.30554	7.29322	2.86656	0.0207384	0.0943947	1.55614	0.827064	0.795531	1.05011	0.814816	1.08854	0.579914	0.020637	0.00612614	0.0142341	2.00537	1.54217	1.4868
chr1	36032507	36033507	DHS_3559:::chr1:::36033007	3.02306	4.8484	1.60381	0.681501	0.681185	0.961382	2.51052	0.811348	0.584107	1.17902	0.666464	0.872109	0.824446	0.0515925	0.00612614	0	1.26398	2.71336	2.1961
chr1	36035394	36036394	p300_674:::chr1:::36035894	17.556	26.9043	1.53249	0.615877	0.218306	0.509071	2.01845	1.61209	0.637234	1.50089	0.696235	1.09559	0.531306	0.299236	0.0245046	0	6.42368	9.56317	2.62953
chr1	36040412	36041412	DHS_3563:::chr1:::36040912	9.76271	21.7923	2.2322	1.15846	0.0526121	0.189786	2.2937	1.224	0.791556	1.04455	0.710875	0.885323	0.738126	0.165096	0.0306307	0.0427022	2.19511	3.25528	1.36802
chr1	36067411	36068411	p300_678:::chr1:::36067911	193.589	388.434	2.00648	1.00467	1.5054e-10	8.78061e-09	2.88518	2.65793	2.13127	2.94035	0.270921	3.9375	0.513123	3.28128	0.526848	0.0854044	8.23343	4.62904	3.12925
chr1	36070254	36071254	p300_679:::chr1:::36070754	321.031	382.548	1.19162	0.252926	0.0627509	0.215583	4.3215	5.33552	1.83925	11.6903	0.261402	4.22089	0.314671	5.43785	0.0735137	0.0427022	40.5845	15.4265	7.56342
chr1	36073671	36074671	p300_680:::chr1:::36074171	254.911	294.034	1.15348	0.205993	0.171576	0.435	5.03412	4.92888	1.30941	7.38786	0.214872	6.29142	0.225461	4.32345	0.116397	0.0569363	23.3163	8.00763	7.61968
chr1	36087004	36088004	p300_681:::chr1:::36087504	83.9255	155.549	1.85341	0.890184	3.41325e-05	0.000468352	2.0136	5.87233	3.13418	1.11656	1.07791	3.90166	0.848434	1.42395	0.085766	0.0427022	4.66369	3.64173	9.71566
chr1	36095299	36096299	p300_683:::chr1:::36095799	4.18782	28.495	6.80424	2.76643	2.94031e-05	0.000411664	1.55266	1.10351	0.835919	0.829755	0.280523	0.671624	3.61352	0.0722294	0.0122523	0.0284681	2.57307	2.00923	2.34173
chr1	36111161	36112161	p300_684:::chr1:::36111661	91.7743	106.877	1.16457	0.219795	0.354852	0.689514	6.01184	2.97832	0.799471	3.88371	0.266056	1.57497	0.406061	1.55809	0.0490091	0.0711703	19.6101	13.312	4.98229
chr1	36116451	36117451	p300_685:::chr1:::36116951	271.246	259.109	0.955253	-0.0660452	0.660641	0.948059	4.13487	5.10873	1.64594	13.1812	0.327855	4.03025	0.296342	4.60205	0.0612614	0.156575	16.7879	7.24991	6.97497
chr1	36117737	36118737	p300_686:::chr1:::36118237	176.393	171.957	0.974849	-0.03675	0.832166	1	3.35464	4.63079	1.50431	8.06512	0.311594	2.8085	0.447352	2.99236	0.0612614	0.113873	39.6617	16.3979	5.60553
chr1	36119658	36120658	DHS_3597:::chr1:::36120158	299.065	238.916	0.798876	-0.323957	0.0277271	0.11758	4.26118	3.16547	1.00241	2.97721	0.332156	3.10191	1.45388	5.06638	0.147027	0.113873	8.00674	8.41643	3.46389
chr1	36121431	36122431	p300_687:::chr1:::36121931	303.335	229.143	0.75541	-0.404668	0.00584408	0.0348445	2.89604	8.00211	5.17176	3.94972	0.358655	6.43591	0.743887	5.14893	0.318559	0.142341	8.53562	5.99396	6.86713
chr1	36171330	36172330	DHS_3619:::chr1:::36171830	1.8583	0.782542	0.421107	-1.24774	0.764832	1	2.46658	0.968651	0.622535	1.50915	2.30982	0.823659	1.20455	0.0309555	0.00612614	0	1.63743	0.565283	2.00737
chr1	36172587	36173587	DHS_3620:::chr1:::36173087	3.18979	0.833592	0.261332	-1.93605	0.618576	0.93226	1.58755	0.847628	0.694297	1.69231	1.70585	0.6079	0.967247	0.0515925	0.00612614	0	1.98958	0.79436	1.39492
chr1	36188771	36189771	DHS_3626:::chr1:::36189271	30.4263	52.2097	1.71594	0.778999	0.114879	0.331367	1.56258	2.16521	1.29904	0.82585	0.689025	1.62309	0.452435	0.505606	0.0612614	0	1.70598	1.8937	1.21483
chr1	36303232	36304232	DHS_3651:::chr1:::36303732	42.1295	58.8102	1.39594	0.481237	0.1321	0.364921	2.37668	2.78295	1.18102	1.25097	0.981774	1.50676	0.235044	0.711976	0.0306307	0.0854044	1.7342	2.48184	2.40105
chr1	36308002	36309002	p300_698:::chr1:::36308502	6.68407	13.1927	1.97375	0.980943	0.203837	0.486548	3.46542	3.01742	1.28424	1.3134	1.93251	1.34932	0.356527	0.113503	0.00612614	0	6.46977	4.83691	3.36546
chr1	36309367	36310367	DHS_3653:::chr1:::36309867	8.07114	12.9546	1.60505	0.68262	0.357388	0.690707	1.52693	1.2181	0.587651	1.01076	1.71487	0.9355	0.291498	0.13414	0	0.0284681	1.06496	2.0083	2.06715
chr1	36524000	36525000	DHS_3719:::chr1:::36524500	73.7761	76.6304	1.03869	0.054763	0.883166	1	1.60559	2.96079	1.36425	1.2516	0.993477	1.4123	0.600918	1.23822	0.0735137	0.0284681	1.94969	2.65609	3.80685
chr1	37000145	37001145	p300_767:::chr1:::37000645	121.674	63.1398	0.518926	-0.946398	8.43096e-05	0.00101386	3.56609	4.31972	1.74103	2.56869	0.312631	2.474	0.3678	2.05338	0.0490091	0.142341	4.96065	5.38807	3.21759
chr1	37016760	37017760	DHS_3900:::chr1:::37017260	1.8583	2.76442	1.48761	0.572998	0.850064	1	2.06265	1.12964	0.654007	0.957158	0.771951	1.06627	0.832574	0.0309555	0	0.0142341	1.34869	1.99046	1.71169
chr1	37019337	37020337	p300_771:::chr1:::37019837	6.04612	4.79735	0.79346	-0.33377	0.829223	1	2.26118	1.54192	0.876044	1.60789	0.585458	0.756073	0.484909	0.103185	0	0	6.60732	6.44336	3.84143
chr1	37027016	37028016	p300_772:::chr1:::37027516	7.68211	29.167	3.79675	1.92476	0.00104133	0.00843973	2.7739	1.35268	0.722718	1.26576	0.383447	1.06308	0.314638	0.13414	0.00612614	0	3.37666	3.54376	2.09737
chr1	37040280	37041280	p300_775:::chr1:::37040780	313.956	315.512	1.00496	0.00713342	1	1	3.01537	4.46464	1.82363	7.37538	0.261384	5.73229	0.241458	5.34498	0.0245046	0.213511	31.8843	13.376	7.50272
chr1	37050911	37051911	p300_779:::chr1:::37051411	15.3932	19.4191	1.26154	0.335188	0.562933	0.882483	1.59098	0.816147	0.491978	1.78115	0.318844	0.909759	2.3783	0.257962	0.0490091	0.0142341	3.97199	1.25442	1.84509
chr1	37053386	37054386	p300_780:::chr1:::37053886	174.313	169.779	0.973991	-0.0380191	0.835433	1	3.53674	3.68931	1.26847	3.16904	0.372166	4.4171	0.448097	2.96141	0.0551353	0.0142341	4.60573	3.82071	3.27664
chr1	37058190	37059190	p300_781:::chr1:::37058690	115.601	93.0043	0.804528	-0.313785	0.415061	0.753829	4.79234	3.52512	1.13347	4.60879	0.387985	2.59311	0.165548	1.93988	0.00612614	0.0711703	24.3947	10.1296	5.42791
chr1	37061842	37062842	DHS_3922:::chr1:::37062342	171.623	225.51	1.31398	0.393949	0.0205016	0.0935517	2.53231	0.95091	0.430057	1.45836	0.501023	1.71227	0.449345	2.90981	0.00612614	0.0142341	1.09983	0.887887	1.26321
chr1	37066484	37067484	DHS_3924:::chr1:::37066984	114.961	148.055	1.28787	0.364992	0.077411	0.251752	1.99498	2.86379	1.41907	1.06551	0.819824	2.83098	0.625618	1.9502	0.00612614	0.0142341	2.21564	2.02582	4.00995
chr1	37070194	37071194	p300_783:::chr1:::37070694	10.4562	12.0955	1.15677	0.210104	0.808448	1	1.69333	0.792957	0.601336	0.943691	0.723976	0.74074	0.779965	0.175414	0.00612614	0	3.4102	1.72848	2.36076
chr1	37078421	37079421	DHS_3928:::chr1:::37078921	3.66102	2.47525	0.676111	-0.564669	0.780337	1	1.68205	0.779218	0.588499	1.14103	0.7666	0.824428	0.802777	0.061911	0	0	1.37478	3.00587	1.36848
chr1	37085913	37086913	p300_784:::chr1:::37086413	30.564	14.0774	0.460586	-1.11846	0.0216788	0.0976094	2.58041	4.85045	4.80998	0.861757	1.30194	2.45308	0.452435	0.515925	0.0122523	0.0569363	4.33057	4.21778	2.27291
chr1	37105731	37106731	p300_786:::chr1:::37106231	20.1078	55.7311	2.77162	1.47073	0.000129991	0.00146731	7.08355	1.59378	0.667242	3.26362	0.595816	1.18874	0.586025	0.34051	0.0122523	0	14.4217	11.5222	7.96569
chr1	37132316	37133316	DHS_3947:::chr1:::37132816	11.5654	29.0394	2.51088	1.32819	0.0115796	0.0599186	2.22372	1.16204	0.586504	1.09253	1.00858	1.01237	1.16725	0.196051	0.00612614	0	0.782928	2.46502	5.93854
chr1	37134684	37135684	p300_787:::chr1:::37135184	40.3823	81.3001	2.01326	1.00953	0.000650472	0.00569635	2.6086	1.53247	0.925141	0.856888	0.979898	1.32048	0.875441	0.68102	0.0612614	0.0142341	2.54452	1.883	3.46804
chr1	37137012	37138012	p300_788:::chr1:::37137512	14.1173	16.1358	1.14299	0.192807	0.78344	1	2.05062	0.981218	0.566225	1.01969	0.960664	0.750114	0.951737	0.237325	0	0.0142341	4.14078	3.13856	2.85777
chr1	37141731	37142731	p300_789:::chr1:::37142231	7.37761	22.0049	2.98266	1.5766	0.0243506	0.106543	3.43918	2.08012	0.956311	1.42002	0.637901	1.10138	0.691755	0.123822	0.0122523	0.0284681	6.73644	5.68109	3.48961
chr1	37145345	37146345	DHS_3957:::chr1:::37145845	6.73965	34.0238	5.0483	2.3358	0.00168872	0.0126497	3.04903	1.59874	0.952088	1.20281	0.826462	1.05918	0.82574	0.113503	0.00612614	0.0142341	2.09333	2.83769	3.12558
chr1	37186527	37187527	p300_794:::chr1:::37187027	96.6846	105.831	1.0946	0.130408	0.564051	0.882483	4.27331	2.50863	0.964926	4.23201	0.300651	2.04714	0.536416	1.63032	0.042883	0.298915	17.1315	10.5547	8.16056
chr1	37210739	37211739	DHS_3979:::chr1:::37211239	8.65353	19.3681	2.23817	1.16232	0.0643687	0.219656	2.65586	1.01347	0.511065	0.879035	0.604327	0.781037	0.614893	0.144459	0.0245046	0.0711703	0.868285	0.911253	0.881587
chr1	37244531	37245531	DHS_3988:::chr1:::37245031	2.96748	13.635	4.59482	2.20001	0.0162739	0.0782064	2.47617	1.08877	0.459423	0.904471	1.5359	0.844732	1.08806	0.0515925	0.00612614	0	1.03032	1.239	0.974314
chr1	37268880	37269880	p300_795:::chr1:::37269380	19.581	61.4131	3.13636	1.64909	1.10283e-05	0.000176654	3.41982	2.08513	0.707263	1.84637	0.513921	1.2711	1.52982	0.330192	0.00612614	0	6.1915	7.75731	3.9887
chr1	37599505	37600505	DHS_4068:::chr1:::37600005	1.8583	2.78995	1.50135	0.586258	0.848841	1	3.57175	0.684812	0.584866	0.741182	2.53585	0.561069	0.50482	0.0309555	0.00612614	0	1.99598	2.74313	2.27066
chr1	37621896	37622896	p300_813:::chr1:::37622396	0.637958	0	0	#NAME?	0.903999	1	3.21374	0.929661	0.586855	1.20036	0.756253	0.797945	0.685314	0.0103185	0	0	3.61284	3.21611	2.00363
chr1	37782508	37783508	p300_825:::chr1:::37783008	2.49625	6.85581	2.74644	1.45756	0.230847	0.528425	2.09338	2.65964	1.59203	0.883081	1.21305	1.30414	0.592069	0.041274	0	0	2.11801	2.77853	1.44568
chr1	37979151	37980151	DHS_4147:::chr1:::37979651	49.8405	51.3845	1.03098	0.044013	0.901137	1	1.53441	4.15241	2.53756	0.990525	1.87424	2.44227	0.559957	0.835798	0	0.0142341	1.52045	1.80465	2.7675
chr1	37982557	37983557	p300_831:::chr1:::37983057	8.7091	17.8285	2.04711	1.03359	0.108083	0.318206	2.56344	1.50434	0.741509	1.06168	1.07731	0.675206	0.783374	0.144459	0	0	3.14111	1.93915	1.98637
chr1	37984903	37985903	p300_832:::chr1:::37985403	18.8319	40.0376	2.12605	1.08818	0.0117063	0.0604669	1.9668	1.33652	0.486554	1.02009	0.849389	0.945739	0.957442	0.319873	0.00612614	0	2.81885	4.05579	1.95509
chr1	38016100	38017100	DHS_4159:::chr1:::38016600	4.29897	19.938	4.63786	2.21346	0.00266958	0.0184876	2.81109	1.39814	0.479667	1.1254	1.17186	1.74909	0.825473	0.0722294	0	0	2.00379	2.07528	1.57469
chr1	38187741	38188741	p300_844:::chr1:::38188241	327.106	295.31	0.902796	-0.147528	0.306699	0.629946	3.58987	3.0043	1.99063	1.10274	1.12145	2.54902	0.353873	5.53071	0.312433	0.0996385	3.17769	5.08375	3.00881
chr1	38189420	38190420	DHS_4205:::chr1:::38189920	24.1289	27.7379	1.14957	0.201099	0.707005	0.98238	1.77168	1.14765	0.755456	0.832041	1.19792	0.753033	0.68814	0.41274	0.0122523	0	0.651622	1.0448	2.59453
chr1	38823490	38824490	p300_861:::chr1:::38823990	15.3376	23.5616	1.5362	0.619364	0.247107	0.553771	2.22677	2.80705	1.5613	0.820867	1.0237	1.5249	0.520799	0.257962	0.00612614	0	2.30142	1.29391	1.76723
chr1	38826637	38827637	p300_862:::chr1:::38827137	1.80272	10.4538	5.79892	2.53578	0.0232984	0.102976	3.64199	0.998455	0.64479	0.961671	0.974806	1.55252	0.374283	0.0309555	0	0	4.2176	2.50297	2.33902
chr1	38880429	38881429	p300_866:::chr1:::38880929	34.1695	42.8531	1.25413	0.326691	0.387413	0.72145	4.35885	2.44544	0.90806	2.35568	0.616601	1.18678	0.609383	0.577836	0.0245046	0.0284681	13.7419	9.66532	4.84529
chr1	38958583	38959583	p300_875:::chr1:::38959083	58.0495	109.744	1.89053	0.918788	0.000271016	0.0027284	2.96485	1.32091	0.697268	2.29914	0.477348	1.11153	0.845777	0.980257	0	0.0284681	3.59477	3.41897	3.64984
chr1	38960497	38961497	p300_876:::chr1:::38960997	21.4393	37.4347	1.74608	0.804121	0.0557024	0.197775	3.7005	1.14109	0.647349	1.33914	0.785625	0.587405	0.696879	0.361147	0	0.0142341	7.03889	4.32845	2.56179
chr1	39062222	39063222	p300_882:::chr1:::39062722	35.6387	88.6066	2.48624	1.31397	1.21986e-05	0.000192394	2.32899	2.30413	0.658144	1.77621	0.880268	1.49824	0.547582	0.608791	0.0122523	0	4.50994	3.31677	3.63221
chr1	39086426	39087426	DHS_4349:::chr1:::39086926	0.637958	1.59061	2.49328	1.31805	0.792653	1	1.96239	3.10366	2.25591	0.82756	1.20306	1.31393	0.48679	0.0103185	0	0	1.46644	2.28446	1.75165
chr1	39086682	39087682	DHS_4350:::chr1:::39087182	0.637958	2.00741	3.14661	1.6538	0.641573	0.934186	2.02656	2.86037	2.1342	0.659873	1.21189	1.22547	0.484012	0.0103185	0	0	0.649296	1.4602	1.10797
chr1	39179146	39180146	p300_886:::chr1:::39179646	6.15727	16.1358	2.62061	1.3899	0.0548267	0.195501	2.37935	2.09591	0.606191	1.97986	0.629189	1.04782	0.790021	0.103185	0	0	14.9103	7.28714	3.40491
chr1	39235340	39236340	DHS_4373:::chr1:::39235840	9.81829	27.84	2.83553	1.50362	0.00613202	0.0361658	1.74906	3.16907	1.82177	0.767914	1.34268	1.26743	0.994608	0.165096	0	0	1.84035	2.05213	3.68213
chr1	39565319	39566319	DHS_4490:::chr1:::39565819	1.8583	4.04034	2.17422	1.12049	0.527485	0.854757	3.39884	0.577619	0.561749	0.705074	0.699222	0.912151	0.658088	0.0309555	0.0122523	0.0142341	0.668077	2.50406	0.57001
chr1	39568669	39569669	DHS_4494:::chr1:::39569169	2.3851	3.98929	1.67259	0.742081	0.707958	0.983321	2.60227	0.761154	0.443354	0.779317	0.980112	1.01898	0.704507	0.041274	0.00612614	0.0427022	1.34643	1.76632	0.680433
chr1	39579094	39580094	DHS_4499:::chr1:::39579594	1.8583	9.22896	4.96636	2.31219	0.0439483	0.166222	2.38809	0.698508	0.356006	0.93623	0.557075	1.09542	0.885648	0.0309555	0	0.0142341	1.14056	1.74563	1.87329
chr1	39584880	39585880	p300_913:::chr1:::39585380	18.1939	22.3622	1.2291	0.297608	0.617144	0.931105	3.56922	1.09587	0.320266	1.08858	0.601871	1.99917	0.229648	0.309555	0.0490091	0.0142341	11.9003	5.72728	1.42989
chr1	39586814	39587814	DHS_4503:::chr1:::39587314	54.5262	69.5448	1.27544	0.350994	0.246478	0.552762	2.76336	2.66783	0.997179	1.31239	0.477493	2.19847	0.33022	0.928664	0.110271	0.0427022	2.01635	2.64516	3.17487
chr1	39590437	39591437	p300_914:::chr1:::39590937	17.6671	12.8525	0.727481	-0.459018	0.46666	0.806009	4.70615	2.66727	0.964137	1.32218	0.635044	1.28926	0.267108	0.299236	0.110271	0.0996385	2.94847	2.6861	2.10338
chr1	39664963	39665963	DHS_4535:::chr1:::39665463	3.66102	19.6828	5.37632	2.42662	0.00145152	0.0111592	2.40292	1.4984	0.748999	0.875436	0.701996	1.29285	0.475145	0.061911	0	0	2.79956	1.31165	2.20947
chr1	39670794	39671794	p300_919:::chr1:::39671294	48.5357	102.888	2.11985	1.08396	5.76796e-05	0.000733709	2.53904	3.78107	1.89679	1.05992	1.0308	2.79418	0.39501	0.825479	0.0122523	0.0569363	2.77741	1.34237	1.70245
chr1	39713175	39714175	DHS_4552:::chr1:::39713675	20.8013	291.636	14.02	3.80942	1.43699e-54	3.15186e-51	3.03557	0.962053	0.627579	1.296	0.875802	1.90206	0.765013	0.350829	0.0918921	0.0427022	2.16528	3.31397	1.61651
chr1	39792900	39793900	DHS_4573:::chr1:::39793400	69.975	116.651	1.66704	0.737286	0.00216176	0.0155372	1.72588	2.3525	1.16741	1.17334	0.835953	1.56494	0.939364	1.18663	0.00612614	0	2.85883	2.76344	2.20169
chr1	39818564	39819564	p300_931:::chr1:::39819064	24.6291	54.0895	2.19616	1.13498	0.00192029	0.0140616	2.63834	4.49389	1.5056	1.9087	0.991362	1.84555	0.447904	0.41274	0.00612614	0	3.86894	1.92254	4.62142
chr1	39915850	39916850	p300_937:::chr1:::39916350	37.137	55.1612	1.48534	0.570797	0.090115	0.27964	2.61426	4.18028	1.76816	1.80831	0.768758	1.17332	0.499138	0.629428	0.0122523	0.0142341	13.0091	7.02721	5.8584
chr1	39921668	39922668	p300_939:::chr1:::39922168	32.2556	42.6744	1.32301	0.403821	0.286011	0.602503	3.2828	2.425	1.21747	2.05562	0.990737	1.20676	0.86405	0.54688	0.0245046	0.0142341	3.77785	2.92854	2.35887
chr1	39924470	39925470	p300_940:::chr1:::39924970	21.5771	27.7124	1.28435	0.361034	0.555433	0.875367	2.37067	1.4854	0.622071	1.82376	0.738171	1.06754	0.491089	0.371466	0.0122523	0	3.95273	2.33853	1.89787
chr1	39941278	39942278	DHS_4608:::chr1:::39941778	139.23	159.972	1.14898	0.20035	0.293501	0.611777	1.96814	5.00692	2.02955	1.24167	0.843577	1.77065	0.511209	2.35262	0.0551353	0.0142341	2.3706	3.55415	8.61634
chr1	39952244	39953244	p300_944:::chr1:::39952744	3.07864	4.87393	1.58315	0.662794	0.678109	0.958799	2.27829	0.943814	0.622535	1.60347	1.4785	0.872109	0.795002	0.0515925	0.00612614	0	3.70576	1.35668	1.44119
chr1	40113568	40114568	DHS_4667:::chr1:::40114068	19.4143	59.2186	3.05026	1.60893	2.72081e-05	0.000385336	2.20477	2.41677	1.06473	1.18613	0.759283	1.0188	0.788009	0.330192	0.0122523	0	2.2741	2.79685	2.58907
chr1	40722229	40723229	p300_971:::chr1:::40722729	3.02306	1.59061	0.526159	-0.926429	0.682853	0.962649	2.01845	2.38975	0.668574	1.69903	1.40547	0.617307	1.0937	0.0515925	0.00612614	0	4.84645	3.77498	3.03021
chr1	40736543	40737543	p300_972:::chr1:::40737043	23.7688	17.097	0.719305	-0.475324	0.350822	0.685627	3.02376	5.38726	4.4	0.971293	10.3809	0.934699	1.17236	0.402421	0	0	2.69607	3.53687	2.73738
chr1	40964399	40965399	DHS_4759:::chr1:::40964899	12.259	22.2091	1.81166	0.857313	0.12831	0.358437	4.06011	1.41543	0.284103	1.72516	0.923857	0.335812	1.12554	0.20637	0	0	1.59285	3.65679	2.14049
chr1	41187907	41188907	p300_976:::chr1:::41188407	25.2115	22.2346	0.881925	-0.181272	0.759317	1	4.07232	3.00704	1.02987	1.76005	3.57472	0.882734	2.31259	0.423058	0.00612614	0.0142341	9.92739	5.9801	5.26359
chr1	41197061	41198061	p300_978:::chr1:::41197561	8.01557	8.05515	1.00494	0.00710658	1	1	6.33937	1.57211	0.652081	1.4608	1.6085	0.652499	1.3951	0.13414	0	0	9.63316	7.61285	3.81248
chr1	41446721	41447721	p300_980:::chr1:::41447221	13.1458	13.3459	1.01522	0.0217873	1	1	4.25948	2.93589	0.869323	1.70604	1.14202	0.839318	0.523711	0.227007	0.0183784	0	18.7054	7.834	5.45476
chr1	42091927	42092927	p300_983:::chr1:::42092427	1.16476	17.2075	14.7734	3.88493	0.000444406	0.00413805	3.45262	1.03508	0.325223	1.07342	0.661194	0.46596	0.978239	0.020637	0.00612614	0	6.96206	7.39357	3.56406
chr1	42115062	42116062	p300_984:::chr1:::42115562	3.02306	7.22156	2.38882	1.2563	0.286111	0.602613	3.40778	1.18143	0.561749	1.98341	0.573806	0.393477	2.60864	0.0515925	0	0	11.6982	11.5425	4.41893
chr1	42165009	42166009	p300_985:::chr1:::42165509	0.637958	1.98188	3.1066	1.63534	0.643776	0.934702	5.21197	0.56251	0.464168	1.24611	0.681878	0.365767	0.707271	0.0103185	0	0	2.27711	1.99149	1.94285
chr1	42224272	42225272	p300_986:::chr1:::42224772	0	0.416796	Inf	Inf	1	1	2.79088	0.743728	0.345209	0.706095	0.835029	0.471513	2.16415	0	0	0	3.61284	4.06246	1.31007
chr1	42448544	42449544	p300_987:::chr1:::42449044	0	2.50078	Inf	Inf	0.496077	0.829784	2.44886	0.799417	0.363485	1.25462	0.670487	0.47738	1.59299	0	0.00612614	0	4.86835	4.60428	2.43428
chr1	42694041	42695041	DHS_4860:::chr1:::42694541	0	0.416796	Inf	Inf	1	1	2.57159	0.464026	0.386203	0.713988	1.30841	0.37456	1.72791	0	0	0	0.666242	1.60236	0.596866
chr1	42970234	42971234	DHS_4922:::chr1:::42970734	3.66102	3.96376	1.08269	0.114626	1	1	2.97701	0.793751	0.439528	0.634599	1.0384	0.733448	0.486254	0.061911	0	0.0427022	2.3193	4.31034	1.3852
chr1	42974391	42975391	DHS_4924:::chr1:::42974891	13.4793	8.47194	0.628515	-0.669981	0.367614	0.700468	2.87576	3.34011	1.92686	0.804101	1.00071	1.11697	0.547674	0.227007	0.0122523	0	2.06957	2.93218	3.01595
chr1	43006860	43007860	p300_998:::chr1:::43007360	4.2434	13.1927	3.109	1.63645	0.0532705	0.191516	1.81584	0.920293	0.725593	0.813882	1.46885	0.9591	1.49181	0.0722294	0	0.0284681	2.44962	2.18062	1.77653
chr1	43394578	43395578	DHS_4976:::chr1:::43395078	1.22034	4.87393	3.99392	1.9978	0.24018	0.543712	2.2012	1.05461	0.457722	1.27431	0.713753	0.77481	1.03621	0.020637	0.0122523	0	2.18608	3.24188	2.83832
chr1	43453072	43454072	p300_1009:::chr1:::43453572	5.99054	3.25779	0.543823	-0.87879	0.458518	0.796801	2.26429	1.4223	1.05628	1.67441	0.68697	0.332942	0.754164	0.103185	0	0	5.42863	2.46019	3.59593
chr1	43939298	43940298	p300_1024:::chr1:::43939798	97.2381	133.05	1.36829	0.452379	0.0375804	0.147537	1.84499	5.80352	4.5765	1.26391	0.718268	3.83456	0.342995	1.65096	0.0367568	0	2.16528	2.46181	2.41399
chr1	43955900	43956900	p300_1026:::chr1:::43956400	90.4162	108.57	1.20078	0.263975	0.249707	0.55763	2.95899	5.7764	2.63669	1.38137	1.29566	2.70232	0.529581	1.52714	0.0367568	0.0142341	4.1114	3.01405	3.28606
chr1	44091524	44092524	DHS_5042:::chr1:::44092024	26.3206	45.8556	1.74219	0.800904	0.0341476	0.137485	1.80937	5.25084	5.1945	1.14558	1.27527	2.69007	0.600194	0.443695	0.00612614	0	2.1164	1.32785	1.97846
chr1	44098331	44099331	DHS_5044:::chr1:::44098831	15.3376	29.873	1.9477	0.961768	0.0479085	0.17685	1.77991	4.40531	3.39296	1.14901	1.28703	1.93591	0.477381	0.257962	0	0	1.2598	2.20357	3.00965
chr1	44138042	44139042	DHS_5048:::chr1:::44138542	44.5702	71.0334	1.59374	0.672419	0.0251749	0.109328	2.44594	2.76138	1.72695	0.731302	0.541871	1.21909	0.394713	0.75325	0.0367568	0.128107	0.706003	1.32311	1.74687
chr1	44606405	44607405	DHS_5108:::chr1:::44606905	45.097	64.5688	1.43178	0.517807	0.0944093	0.289362	2.68813	1.042	0.490874	0.841622	2.12832	1.48657	0.714023	0.763568	0.220541	0.0569363	1.51098	1.13268	1.28918
chr1	44946364	44947364	p300_1045:::chr1:::44946864	0	0.391271	Inf	Inf	1	1	5.50192	0.622693	0.438527	1.03967	0.363896	0.33509	1.31904	0	0	0	4.61927	1.75931	2.13588
chr1	44948169	44949169	DHS_5136:::chr1:::44948669	0.582381	3.70012	6.35343	2.66754	0.276704	0.59008	8.15382	0.487051	0.376783	1.42575	0.533085	0.395876	1.79781	0.0103185	0	0	3.09829	3.87977	1.26167
chr1	45047456	45048456	DHS_5143:::chr1:::45047956	0.582381	1.19934	2.05937	1.0422	0.974054	1	2.63277	0.813958	0.369411	1.15057	0.513459	0.352846	1.88311	0.0103185	0	0	2.38495	3.29339	1.27447
chr1	45054887	45055887	DHS_5144:::chr1:::45055387	0	0	NA	NA	NA	NA	4.81677	0.194504	0.321	1.21056	0.46698	0.168633	1.34158	0	0	0	1.64974	0.983739	1.16445
chr1	45631660	45632660	p300_1049:::chr1:::45632160	6.57292	9.64576	1.4675	0.55336	0.576982	0.895717	2.80583	0.989848	0.692501	1.8659	0.33429	0.44775	2.04081	0.113503	0.00612614	0	9.65667	2.7426	4.75664
chr1	45637027	45638027	DHS_5173:::chr1:::45637527	1.16476	3.25779	2.79696	1.48386	0.530429	0.855078	2.58711	0.794034	0.627334	2.66255	0.450945	0.461387	1.26724	0.020637	0	0	0.820683	0.769014	1.54047
chr1	45883402	45884402	DHS_5196:::chr1:::45883902	86.1439	108.723	1.26211	0.335842	0.162998	0.420283	5.23837	0.919213	0.382524	1.41438	0.517035	0.803817	0.471418	1.46523	0.0367568	0.227745	1.97969	2.59707	1.70786
chr1	45916427	45917427	DHS_5198:::chr1:::45916927	4.18782	10.9472	2.61406	1.38629	0.13971	0.379988	2.92569	0.619609	0.525893	1.32778	0.675046	0.518008	0.858561	0.0722294	0	0	0.982824	0.161166	2.12784
chr1	45923221	45924221	p300_1053:::chr1:::45923721	9.29148	12.8525	1.38326	0.468069	0.517199	0.850155	2.28504	1.35011	0.466358	2.38474	0.591975	0.673736	0.487274	0.154777	0.00612614	0	2.83257	1.28628	1.56161
chr1	45939969	45940969	DHS_5206:::chr1:::45940469	0	2.86652	Inf	Inf	0.196217	0.476843	2.48541	0.562977	0.49188	1.05326	0.785726	0.581406	1.22061	0	0	0	0.919259	0.904452	1.78433
chr1	46920035	46921035	p300_1062:::chr1:::46920535	13.3126	9.30554	0.699004	-0.516628	0.470392	0.810349	3.15126	1.57579	0.428764	2.46334	0.63886	0.768485	0.48313	0.227007	0.0183784	0.0569363	3.39375	4.9468	4.72945
chr1	46950831	46951831	p300_1063:::chr1:::46951331	109.33	73.3044	0.670486	-0.576721	0.0153055	0.0746078	4.77281	6.6425	4.068	7.30698	0.540537	3.21913	0.34972	1.85733	0.153154	0.284681	6.0628	4.54487	6.26488
chr1	46972752	46973752	p300_1064:::chr1:::46973252	1.16476	2.03293	1.74536	0.803526	0.901669	1	6.64091	0.753551	0.408063	2.38474	0.538763	0.704361	0.365455	0.020637	0	0	5.33831	2.14381	2.14722
chr1	46978218	46979218	p300_1065:::chr1:::46978718	6.15727	12.121	1.96857	0.977147	0.226904	0.522501	9.95831	1.42847	0.519494	3.5932	0.424277	0.258546	0.63802	0.103185	0	0	8.3801	6.16708	7.75163
chr1	47020446	47021446	DHS_5283:::chr1:::47020946	0.582381	3.67459	6.3096	2.65755	0.262062	0.573708	3.92832	0.842578	0.469309	1.3599	0.946014	1.23273	1.14417	0.0103185	0	0	1.16944	2.10943	2.00802
chr1	47027037	47028037	DHS_5285:::chr1:::47027537	0	1.17381	Inf	Inf	0.665773	0.949084	1.97258	0.55974	0.337049	0.976658	0.615315	0.708259	0.69455	0	0	0	1.36479	0.688617	1.19132
chr1	47063575	47064575	DHS_5289:::chr1:::47064075	3.07864	5.99669	1.94784	0.961876	0.449301	0.78733	2.98952	1.5662	0.519264	1.36747	0.545079	0.409183	1.04894	0.0515925	0	0	1.94087	3.05538	1.56489
chr1	47363446	47364446	p300_1067:::chr1:::47363946	1.22034	6.85581	5.61796	2.49005	0.0830282	0.263142	3.40254	0.589564	0.31779	2.29309	0.451231	0.111298	3.17285	0.020637	0	0	4.22334	2.42393	2.83767
chr1	47890589	47891589	p300_1069:::chr1:::47891089	1.22034	1.22486	1.00371	0.00533941	1	1	3.62691	1.04006	0.482753	2.592	0.506754	0.355051	1.42915	0.020637	0.0122523	0.0427022	11.7286	3.55068	5.92721
chr1	50692193	50693193	DHS_5437:::chr1:::50692693	6.10169	18.2198	2.98602	1.57823	0.0249018	0.108397	4.83762	0.82517	0.561749	1.14901	0.967256	0.536559	0.569157	0.103185	0	0.0142341	1.33615	1.75284	2.28004
chr1	50694563	50695563	DHS_5442:::chr1:::50695063	167.102	509.482	3.04893	1.6083	2.32623e-22	8.17131e-20	12.6668	2.51312	0.67257	5.95414	0.661882	0.441658	0.351367	2.83759	0.0612614	0.128107	2.98525	2.67952	5.16111
chr1	50709902	50710902	DHS_5445:::chr1:::50710402	0.582381	3.28332	5.63775	2.49512	0.329417	0.659298	5.48493	0.578815	0.307043	1.64858	0.560535	0.161301	0.401017	0.0103185	0	0.0142341	0.860734	0.564581	2.65603
chr1	50761194	50762194	DHS_5446:::chr1:::50761694	1.22034	3.64907	2.99021	1.58025	0.436914	0.77694	5.30658	0.987719	0.478393	1.06005	0.655013	0.209431	0.944158	0.020637	0	0	3.72522	1.17287	2.58086
chr1	51428118	51429118	DHS_5489:::chr1:::51428618	0.582381	1.64166	2.81888	1.49512	0.793036	1	3.08673	0.460281	0.361551	0.6891	0.952565	0.518008	1.41949	0.0103185	0	0	1.47424	0.644663	1.46747
chr1	51468267	51469267	DHS_5492:::chr1:::51468767	0	1.19934	Inf	Inf	0.639786	0.933728	2.25235	0.714203	0.609968	0.813676	0.88358	0.780199	1.78266	0	0	0	1.78427	1.43043	2.01289
chr1	51486158	51487158	p300_1089:::chr1:::51486658	1.22034	3.18122	2.60683	1.3823	0.531695	0.855871	5.23107	0.993228	0.420577	1.27384	0.863777	0.849787	0.946485	0.020637	0	0	11.3668	4.12449	4.26105
chr1	51515794	51516794	p300_1090:::chr1:::51516294	68.0611	127.292	1.87026	0.903237	0.000131721	0.00148453	1.70678	4.02564	3.04418	1.46372	0.720601	2.02887	0.514295	1.15567	0.0122523	0.0142341	3.906	2.78485	3.39785
chr1	51542806	51543806	DHS_5516:::chr1:::51543306	18.6652	27.083	1.45099	0.537041	0.294918	0.613098	1.90836	1.58543	0.606689	1.42477	1.2255	1.39291	0.806069	0.319873	0	0	0.923855	1.65268	3.86239
chr1	51565661	51566661	p300_1093:::chr1:::51566161	119.509	101.374	0.848258	-0.237425	0.269223	0.579571	2.81773	2.22284	1.51098	4.85498	0.926341	1.46908	0.73832	2.03274	0.0551353	0.0284681	10.5367	3.64917	5.43715
chr1	51586579	51587579	p300_1094:::chr1:::51587079	16.4468	35.9462	2.18561	1.12804	0.0135427	0.0676907	2.06348	0.903188	0.712106	1.4683	0.477022	0.989543	0.592035	0.278599	0.00612614	0.0711703	4.03543	0.788454	2.30759
chr1	51592501	51593501	p300_1095:::chr1:::51593001	25.8494	27.9166	1.07997	0.110992	0.820377	1	4.18273	1.54387	0.399419	4.00078	0.487904	0.59246	0.319136	0.433377	0.00612614	0.0142341	10.187	10.1381	5.40231
chr1	51629509	51630509	p300_1096:::chr1:::51630009	132.85	237.155	1.78513	0.83603	2.28002e-06	4.47955e-05	4.0429	4.99721	1.77859	3.63796	0.489559	1.84946	0.70886	2.24943	0.0551353	0.0142341	4.93454	4.04588	4.01138
chr1	51653504	51654504	p300_1097:::chr1:::51654004	19.9966	43.2188	2.1613	1.1119	0.00767986	0.0434016	1.80706	2.17007	0.688902	1.15289	0.862255	1.35989	0.4217	0.34051	0.0183784	0.0284681	2.10676	1.74015	4.70682
chr1	51679561	51680561	DHS_5531:::chr1:::51680061	103.173	180.837	1.75275	0.809623	4.69268e-05	0.000614499	3.44846	3.19255	1.41406	2.09001	0.640953	2.66615	0.93776	1.75414	0.0306307	0.0854044	1.73766	3.51432	2.50804
chr1	51681104	51682104	p300_1098:::chr1:::51681604	320.42	447.312	1.39602	0.481317	0.000253326	0.00257782	3.5532	5.83909	3.12618	5.55298	0.450563	5.03255	0.694029	5.43785	0.0980183	0.0427022	7.7899	10.1296	6.65225
chr1	51693245	51694245	DHS_5539:::chr1:::51693745	0	1.66718	Inf	Inf	0.588624	0.905337	2.57067	1.22452	0.495505	1.19237	1.37019	0.704361	1.20803	0	0	0	2.1789	4.00178	1.56161
chr1	51734989	51735989	DHS_5544:::chr1:::51735489	11.0942	35.0105	3.15575	1.65798	0.000822835	0.00692819	1.8591	0.592875	0.325223	0.972239	0.667941	0.735977	0.862593	0.185733	0.00612614	0	1.58963	2.69871	1.56372
chr1	51738377	51739377	p300_1101:::chr1:::51738877	1.80272	10.5049	5.82724	2.54281	0.0230679	0.102271	1.94506	0.411485	0.29211	1.22944	0.369189	0.661041	2.92689	0.0309555	0.0245046	0	3.1915	2.31375	1.60515
chr1	51744452	51745452	DHS_5549:::chr1:::51744952	3.07864	10.607	3.44535	1.78465	0.0712683	0.236675	2.49407	1.38993	0.639232	1.17432	0.669931	0.845749	0.610181	0.0515925	0.00612614	0	0.97341	1.27698	1.7441
chr1	51746083	51747083	p300_1102:::chr1:::51746583	4.18782	27.083	6.46709	2.69312	6.69718e-05	0.000832869	1.77624	1.05171	0.56849	1.47877	1.11116	1.09072	0.740331	0.0722294	0	0	2.21725	1.69675	2.64849
chr1	51760620	51761620	DHS_5556:::chr1:::51761120	1.74714	4.82288	2.76044	1.4649	0.380168	0.714671	2.2976	0.679799	0.683661	0.847089	0.888061	0.663051	0.705165	0.0309555	0	0	0.982824	1.28933	2.17186
chr1	51799068	51800068	p300_1103:::chr1:::51799568	70.8352	123.277	1.74033	0.799364	0.000638869	0.00560827	4.18795	2.80745	1.38718	1.54765	0.517995	1.85496	0.592933	1.19695	0.226667	0.185043	3.69228	3.29787	1.78293
chr1	51800557	51801557	DHS_5565:::chr1:::51801057	63.2909	92.1963	1.45671	0.54271	0.0389016	0.151685	3.3974	2.05403	1.14204	1.5851	0.362995	1.43561	0.589526	1.07312	0.085766	0.199277	1.06716	1.29996	1.54787
chr1	51988129	51989129	p300_1113:::chr1:::51988629	71.6399	128.457	1.7931	0.842452	0.000267153	0.00269656	3.99883	2.29205	0.893852	2.69276	0.452295	1.14331	0.345152	1.20726	0.0980183	0.0284681	6.17356	11.4336	4.68484
chr1	51993978	51994978	p300_1114:::chr1:::51994478	0.637958	2.03293	3.18662	1.67203	0.6394	0.933728	2.78052	0.560358	0.315267	0.967278	0.820158	0.828108	0.647834	0.0103185	0	0	2.35677	5.10139	1.97061
chr1	52170261	52171261	p300_1120:::chr1:::52170761	247.369	194.021	0.78434	-0.350449	0.0327171	0.13344	1.79906	4.92957	4.74637	1.89587	0.572213	3.82015	0.274474	4.17899	0.300181	0.0569363	15.2637	12.6466	6.4773
chr1	52410314	52411314	p300_1130:::chr1:::52410814	5.35258	21.5286	4.02211	2.00795	0.00395822	0.0254618	2.03076	2.23232	1.10523	1.20739	0.624799	0.870928	0.901093	0.0928664	0	0	3.09829	3.20235	1.90652
chr1	52581228	52582228	p300_1136:::chr1:::52581728	3.07864	4.77183	1.54998	0.632251	0.681989	0.962043	3.2205	1.12292	0.502377	0.706454	0.510157	1.00289	1.84593	0.0515925	0.00612614	0	3.00441	1.35484	1.68222
chr1	52583776	52584776	p300_1137:::chr1:::52584276	12.8969	13.8137	1.07109	0.0990751	0.939009	1	3.86275	1.10449	0.628861	2.20905	0.39308	0.660728	2.55208	0.216688	0.00612614	0	8.4823	3.61981	2.80768
chr1	52586452	52587452	DHS_5698:::chr1:::52586952	5.51931	14.5963	2.64458	1.40304	0.0701726	0.233827	2.55396	0.665637	0.277435	0.799617	0.397129	0.370993	0.737872	0.0928664	0	0	1.41406	1.97872	2.36473
chr1	52654333	52655333	p300_1138:::chr1:::52654833	56.5512	174.032	3.07742	1.62172	9.83313e-13	9.07452e-11	2.56443	4.02838	1.65455	1.51082	0.674227	2.1996	0.811457	0.95962	0.0367568	0	2.90282	3.47695	3.39203
chr1	52790725	52791725	DHS_5733:::chr1:::52791225	1.27592	3.62354	2.83995	1.50587	0.435279	0.775495	1.78717	0.568565	0.437696	0.763612	0.693298	0.622185	0.493195	0.020637	0	0	1.34729	1.6412	0.632236
chr1	52881271	52882271	DHS_5750:::chr1:::52881771	2.44068	4.04034	1.65542	0.727194	0.703321	0.979861	1.92749	0.471374	0.344765	0.867921	0.810957	0.390099	0.7574	0.041274	0	0	0.594756	0.520157	0.947244
chr1	53011702	53012702	DHS_5779:::chr1:::53012202	68.2834	123.736	1.8121	0.857663	0.000311101	0.00306328	4.32892	2.05266	1.06647	2.83097	0.311367	2.9331	0.398744	1.15567	0.00612614	0.0427022	2.28619	2.23014	2.9409
chr1	53021131	53022131	p300_1148:::chr1:::53021631	28.0678	63.0293	2.24561	1.16711	0.000709412	0.00612407	1.6923	2.21203	1.18687	0.992247	0.619067	1.44495	0.590522	0.474651	0.0122523	0	4.29536	6.28153	4.92051
chr1	54500224	54501224	p300_1182:::chr1:::54500724	13.895	16.289	1.17229	0.229335	0.784574	1	4.22414	1.41561	0.223683	1.05802	1.19316	0.646299	0.379787	0.237325	0.00612614	0.0142341	3.76231	3.56461	3.30812
chr1	54501545	54502545	DHS_5942:::chr1:::54502045	14.1728	18.5855	1.31135	0.391053	0.507349	0.841979	2.94188	1.30702	0.475326	1.30485	1.63274	1.02511	0.531497	0.237325	0.0122523	0	1.87015	2.08537	1.95465
chr1	54642108	54643108	p300_1188:::chr1:::54642608	15.7533	60.2648	3.82555	1.93567	1.18328e-06	2.52549e-05	3.84636	1.58263	1.1451	2.66261	0.369781	1.81605	0.87289	0.268281	0	0	11.3867	4.76735	3.23152
chr1	54663475	54664475	p300_1189:::chr1:::54663975	5.35258	33.1818	6.19922	2.63209	1.29042e-05	0.000202043	3.59672	1.07399	0.39442	1.49025	0.300021	0.805791	1.74002	0.0928664	0.0122523	0	2.53896	1.93399	3.81543
chr1	54668431	54669431	p300_1190:::chr1:::54668931	3.02306	16.5781	5.4839	2.4552	0.00378846	0.0245997	2.9903	1.71032	0.743798	1.56526	0.561427	1.052	0.866828	0.0515925	0	0	2.03163	1.40274	2.93766
chr1	54985473	54986473	DHS_6005:::chr1:::54985973	3.77217	1.64166	0.435203	-1.20024	0.580358	0.897872	3.46922	1.08958	0.441374	1.1379	1.0198	0.811546	0.416334	0.061911	0	0	1.99344	2.07405	1.31374
chr1	54989722	54990722	DHS_6008:::chr1:::54990222	0.582381	2.37315	4.07491	2.02677	0.524478	0.853038	1.59534	0.594727	0.360987	0.84695	0.668706	0.847801	0.428946	0.0103185	0	0	0.555583	0.937087	0.758446
chr1	54991438	54992438	DHS_6009:::chr1:::54991938	1.22034	7.24708	5.93858	2.57012	0.0666332	0.225067	1.8248	0.785992	0.501636	1.03771	0.535941	1.0062	0.262067	0.020637	0.00612614	0	1.2784	2.1243	1.52704
chr1	55085448	55086448	p300_1198:::chr1:::55085948	105.754	141.999	1.34273	0.425166	0.0435914	0.165287	3.52498	3.35713	1.61198	2.20726	0.420985	2.27703	0.293188	1.7851	0.0245046	0.0427022	3.41425	2.72253	2.43898
chr1	55087571	55088571	p300_1199:::chr1:::55088071	16.4468	30.681	1.86547	0.899542	0.0610883	0.21201	3.68827	1.65804	0.674099	1.81543	0.461486	1.55817	0.328688	0.278599	0.0122523	0.0284681	5.03921	9.69573	2.5582
chr1	55163443	55164443	p300_1207:::chr1:::55163943	149.241	261.618	1.75299	0.809814	1.54885e-06	3.19336e-05	2.40662	1.99691	0.8746	4.8223	0.238632	2.73678	1.71508	2.52803	0.0306307	0.0854044	9.94921	5.12755	4.49905
chr1	55165115	55166115	p300_1208:::chr1:::55165615	253.608	377.657	1.48913	0.574474	4.5432e-05	0.000597495	3.16542	2.82153	1.16773	7.53038	0.203557	3.93632	0.762564	4.29249	0.0673875	0.0427022	14.1852	12.7241	5.53942
chr1	55218408	55219408	p300_1212:::chr1:::55218908	109.47	155.174	1.4175	0.50335	0.0124172	0.063385	2.22707	2.35204	0.863022	1.22684	0.295411	1.63216	0.282542	1.84701	0.0122523	0.113873	2.77415	3.13148	2.6972
chr1	55220586	55221586	p300_1213:::chr1:::55221086	50.2272	85.5191	1.70264	0.767777	0.0104581	0.0552891	3.18446	2.91889	1.17986	2.56668	0.34682	2.10109	0.327346	0.856435	0.042883	0.0569363	4.70897	2.54944	2.49993
chr1	55291665	55292665	p300_1221:::chr1:::55292165	44.9036	49.3432	1.09887	0.136019	0.684336	0.963428	2.39114	3.25205	2.18091	1.20815	0.709657	1.78222	0.675177	0.75325	0.0245046	0.0142341	4.45322	2.3764	3.33586
chr1	55436860	55437860	DHS_6138:::chr1:::55437360	2.44068	6.38796	2.61729	1.38807	0.277611	0.591393	2.11281	0.865869	0.502377	0.847745	1.18654	0.60701	1.4435	0.041274	0	0.0142341	2.34719	1.35484	1.9626
chr1	55439657	55440657	p300_1227:::chr1:::55440157	2.55183	3.62354	1.41998	0.505867	0.803895	1	1.92234	1.00854	0.989749	0.916472	1.33685	0.955587	0.531044	0.041274	0	0	5.29917	3.27913	5.73267
chr1	55930696	55931696	DHS_6180:::chr1:::55931196	5.40816	21.7412	4.02008	2.00722	0.00336202	0.0222934	1.96835	1.97095	0.766927	1.54627	0.645044	1.28926	0.549479	0.0928664	0.00612614	0	1.88375	1.93399	2.83711
chr1	55957261	55958261	p300_1233:::chr1:::55957761	1.16476	2.4242	2.08129	1.05747	0.761625	1	2.538	0.905896	0.840962	1.64533	0.717564	0.230498	0.522113	0.020637	0	0	3.96328	6.99211	4.326
chr1	56740943	56741943	p300_1236:::chr1:::56741443	2.44068	4.50818	1.8471	0.885264	0.60612	0.920822	3.63153	0.7659	0.542946	0.780028	0.548699	0.407471	0.486254	0.041274	0	0	12.1763	11.4097	2.82811
chr1	56754045	56755045	p300_1237:::chr1:::56754545	5.46374	14.7833	2.70572	1.43601	0.0681423	0.228523	8.95354	1.53155	0.328101	1.97136	0.486671	0.344728	0.457089	0.0928664	0	0	8.99328	6.97149	2.74664
chr1	56780044	56781044	p300_1238:::chr1:::56780544	2.44068	6.77923	2.7776	1.47384	0.234396	0.53432	2.4872	0.741349	0.380712	1.07822	0.681658	0.461543	0.887369	0.041274	0	0	3.61223	2.01037	2.4189
chr1	57070451	57071451	DHS_6270:::chr1:::57070951	0.637958	2.05846	3.22663	1.69003	0.637258	0.933728	2.72936	0.481436	0.155453	0.854531	0.700614	0.244995	0.866264	0.0103185	0	0	1.74312	2.47729	1.04107
chr1	57326246	57327246	p300_1251:::chr1:::57326746	6.57292	28.9883	4.41027	2.14087	0.000363395	0.0034948	1.50065	2.11003	1.29239	0.867389	0.990754	1.80344	0.654077	0.113503	0	0	3.17009	2.57444	2.83999
chr1	57349834	57350834	p300_1253:::chr1:::57350334	4.35455	8.05515	1.84982	0.887387	0.383826	0.718582	3.89526	0.91963	0.406529	1.38587	0.414371	0.654932	0.434201	0.0722294	0.00612614	0	5.77409	3.45517	1.87553
chr1	57357765	57358765	DHS_6290:::chr1:::57358265	2.44068	4.40608	1.80527	0.852215	0.610459	0.92486	6.65173	1.02871	0.421312	0.732493	0.743506	0.855812	1.01737	0.041274	0	0	1.67974	4.40715	2.19454
chr1	57386121	57387121	p300_1254:::chr1:::57386621	44.6523	68.0392	1.52375	0.60763	0.0509726	0.185431	1.73116	1.14179	0.608903	1.06095	0.555805	0.59237	0.589085	0.763568	0.0245046	0	9.44085	4.97614	1.96341
chr1	57388573	57389573	p300_1255:::chr1:::57389073	20.4679	36.6267	1.78947	0.839534	0.0567827	0.200704	3.28447	2.11704	0.932371	1.15921	0.688361	0.806744	0.604887	0.350829	0.0183784	0.0427022	6.01326	3.40641	2.57112
chr1	57390137	57391137	p300_1256:::chr1:::57390637	16.3912	31.8548	1.94341	0.958591	0.0441775	0.166857	3.4517	2.71571	0.643671	1.55794	0.75401	1.05952	0.620231	0.278599	0	0.0427022	5.13253	3.78739	2.39483
chr1	57397428	57398428	DHS_6296:::chr1:::57397928	22.7708	38.6341	1.69665	0.76269	0.0608595	0.211449	2.59126	0.629657	0.612357	0.953626	0.85114	0.994327	0.45563	0.381784	0.0490091	0.0142341	1.45653	2.72965	1.67768
chr1	57400108	57401108	p300_1257:::chr1:::57400608	38.524	91.3116	2.37025	1.24504	1.78158e-05	0.000267352	4.71112	1.36718	0.58972	0.930888	0.392019	0.78124	0.437569	0.650065	0.0490091	0.0427022	6.03764	5.90896	3.77768
chr1	57401798	57402798	p300_1258:::chr1:::57402298	49.118	79.82	1.62506	0.700497	0.0151277	0.0738705	4.1532	1.28745	0.559437	1.6124	0.493244	0.614504	0.309977	0.835798	0.122523	0.0854044	4.27711	5.1122	2.72479
chr1	57485442	57486442	DHS_6322:::chr1:::57485942	0.637958	2.81547	4.41326	2.14184	0.413929	0.752706	1.99543	1.03768	0.54039	0.74489	1.02406	1.43178	0.335502	0.0103185	0.00612614	0	1.66856	1.84329	2.62248
chr1	57506530	57507530	p300_1264:::chr1:::57507030	13.8394	33.5476	2.42407	1.27743	0.00929021	0.0504483	2.67665	0.882692	0.537325	1.08531	0.809273	1.10088	1.34742	0.237325	0	0	2.61089	5.13768	1.61932
chr1	57526868	57527868	p300_1265:::chr1:::57527368	12.5079	9.77338	0.781378	-0.355908	0.705682	0.981374	2.42962	0.813556	0.52638	1.50967	0.558816	0.697329	1.02027	0.216688	0.00612614	0	27.3735	15.5985	3.16757
chr1	57530333	57531333	DHS_6327:::chr1:::57530833	0.582381	2.00741	3.44689	1.7853	0.646409	0.935943	1.95884	0.435332	0.312873	0.693284	0.553329	0.931395	0.889908	0.0103185	0	0	0.974531	1.02276	0.81485
chr1	57534232	57535232	p300_1266:::chr1:::57534732	9.65156	13.9753	1.44798	0.534042	0.479445	0.813249	4.41828	0.843549	0.313233	1.63085	0.610825	1.13691	2.04303	0.165096	0.00612614	0.0142341	2.87374	1.11702	1.65277
chr1	57535570	57536570	p300_1267:::chr1:::57536070	7.32203	6.41349	0.875916	-0.191135	0.928234	1	3.21314	0.56892	0.290477	0.715676	0.620684	1.10981	1.17723	0.123822	0.0183784	0.0142341	2.96107	1.42432	0.353699
chr1	57566427	57567427	DHS_6330:::chr1:::57566927	0.582381	2.89205	4.96591	2.31206	0.477011	0.811819	1.92124	0.763345	0.538558	0.797191	0.73739	1.07213	1.10568	0.0103185	0	0	1.90704	1.94582	0.569487
chr1	57583990	57584990	p300_1268:::chr1:::57584490	4.18782	5.682	1.35679	0.440198	0.804659	1	1.73062	1.06934	0.602309	1.23197	0.626144	0.492201	1.67819	0.0722294	0.00612614	0	4.6693	5.68793	3.28671
chr1	57621785	57622785	p300_1270:::chr1:::57622285	5.93496	5.18863	0.874247	-0.193887	0.927108	1	2.71715	1.09388	0.756201	1.02748	0.443737	1.13503	0.948139	0.103185	0	0	2.18043	0.847529	1.15756
chr1	57663529	57664529	p300_1271:::chr1:::57664029	33.3382	38.7362	1.16192	0.216506	0.598855	0.914225	4.3683	1.56971	0.590256	1.20732	0.702944	0.93025	0.636001	0.557199	0.0367568	0	4.68822	3.34647	3.62356
chr1	57666065	57667065	DHS_6346:::chr1:::57666565	5.40816	10.0115	1.85119	0.888449	0.338408	0.668075	3.31027	0.718888	0.395471	0.947933	0.682487	0.727145	1.06745	0.0928664	0	0.0711703	2.49441	1.57556	1.54496
chr1	57669769	57670769	p300_1273:::chr1:::57670269	38.2195	27.6614	0.723749	-0.466438	0.437623	0.777845	4.43027	2.89578	1.07042	1.33109	0.838286	1.32915	0.965915	0.639747	0.00612614	0.0284681	18.9136	10.6166	4.61618
chr1	58332397	58333397	p300_1291:::chr1:::58332897	10.3451	21.2734	2.05638	1.0401	0.0797323	0.256821	1.71984	1.91963	0.810013	0.698228	0.971752	0.85106	0.596469	0.175414	0.0306307	0	3.89265	5.56052	2.27321
chr1	59309312	59310312	DHS_6688:::chr1:::59309812	7.84884	14.4176	1.83691	0.877279	0.231744	0.529894	4.28698	3.7258	2.51544	0.85286	0.854793	2.12582	0.266635	0.13414	0.0245046	0	2.14612	1.34067	1.22073
chr1	59418027	59419027	DHS_6725:::chr1:::59418527	10.9275	22.0049	2.01372	1.00986	0.0928711	0.285972	2.23836	0.841759	0.649181	0.971293	0.691331	1.51573	0.51919	0.185733	0	0.0142341	2.3366	2.35791	1.34185
chr1	59424516	59425516	p300_1354:::chr1:::59425016	47.2331	43.6101	0.923295	-0.115137	0.78762	1	2.32899	4.08599	1.86328	1.37086	1.31464	2.27732	0.556242	0.794524	0.042883	0	5.11673	5.68692	5.47525
chr1	59432653	59433653	p300_1355:::chr1:::59433153	246.591	217.991	0.88402	-0.177849	0.256974	0.568139	3.11387	5.46446	2.11082	6.47623	0.35738	3.75592	0.545442	4.17899	0.116397	0.0427022	27.1048	14.1062	8.32215
chr1	59440808	59441808	p300_1357:::chr1:::59441308	6.15727	15.7446	2.55707	1.35449	0.063749	0.218086	3.27484	0.570546	0.655756	0.825411	0.615838	0.953981	0.737872	0.103185	0.0122523	0.0142341	2.07396	2.34973	1.29497
chr1	59448097	59449097	DHS_6733:::chr1:::59448597	50.5051	45.5154	0.901204	-0.150074	0.673839	0.955447	2.35486	0.980939	0.498676	1.03108	0.682784	1.16179	0.656965	0.856435	0.0306307	0.0711703	3.56576	2.87045	2.71045
chr1	59450595	59451595	p300_1358:::chr1:::59451095	45.1525	82.3208	1.82317	0.86645	0.00263198	0.0182762	1.53186	1.19713	0.662062	1.87813	0.474829	1.39122	1.89958	0.763568	0.0245046	0.0142341	4.71355	3.09175	2.18174
chr1	59452761	59453761	DHS_6738:::chr1:::59453261	6.21285	14.0518	2.26174	1.17743	0.114935	0.331481	2.11049	0.565163	0.3692	0.874403	0.487769	1.24539	0.90687	0.103185	0	0.0284681	3.12309	1.23864	1.12783
chr1	59456205	59457205	p300_1360:::chr1:::59456705	9.42925	13.7116	1.45416	0.540184	0.640855	0.934186	2.60717	1.2342	0.772405	1.29024	0.546413	0.946804	0.51113	0.165096	0.00612614	0	5.67786	2.77742	1.60933
chr1	59471042	59472042	p300_1361:::chr1:::59471542	13.895	27.4743	1.97729	0.983521	0.0597923	0.209077	1.98299	1.25471	0.671227	0.989323	0.846959	0.995635	0.742586	0.237325	0.0306307	0.0142341	2.87782	2.03285	1.9832
chr1	59479707	59480707	p300_1362:::chr1:::59480207	113.492	159.24	1.4031	0.488621	0.0145745	0.0717019	3.04183	5.90208	2.00681	3.71347	0.4283	2.56358	0.387181	1.91924	0.085766	0.0284681	36.3174	17.1318	6.51037
chr1	59483443	59484443	p300_1363:::chr1:::59483943	24.878	91.3371	3.6714	1.87633	5.22067e-09	2.08507e-07	3.35948	3.66556	0.948048	4.83056	0.432687	1.29847	0.300708	0.423058	0.0183784	0	8.85888	10.2104	3.4769
chr1	59489788	59490788	p300_1364:::chr1:::59490288	3.60544	22.7025	6.29673	2.6546	0.0003225	0.00316133	3.35847	0.935008	0.392661	1.58517	0.745135	1.02054	0.899718	0.061911	0	0	3.47604	2.3307	2.58354
chr1	59495480	59496480	DHS_6753:::chr1:::59495980	0.582381	7.56178	12.9842	3.69869	0.0489096	0.179596	1.97458	0.819988	0.335828	1.17919	0.894083	1.15263	0.748565	0.0103185	0.0245046	0.0142341	0.418413	0.878236	0.999583
chr1	59505456	59506456	p300_1366:::chr1:::59505956	245.619	278.579	1.13419	0.181663	0.239748	0.543165	3.69783	5.85514	1.86358	6.96321	0.622979	3.98473	0.398542	4.16867	0.226667	0.0854044	23.8907	8.09581	6.56869
chr1	59513363	59514363	p300_1368:::chr1:::59513863	35.3898	84.039	2.37467	1.24772	3.80696e-05	0.00051406	4.26227	2.57423	0.959882	2.83255	0.862486	1.17661	0.731305	0.598473	0.0306307	0.0284681	5.15744	4.80472	4.01774
chr1	59515444	59516444	DHS_6762:::chr1:::59515944	41.4915	96.1345	2.31697	1.21224	1.74542e-05	0.000262468	3.77526	2.79814	1.00699	2.18844	0.783387	1.7313	0.494192	0.701657	0.0735137	0.113873	2.99397	2.9177	2.86103
chr1	59520028	59521028	DHS_6764:::chr1:::59520528	6.6285	20.4653	3.08748	1.62643	0.0146324	0.0719183	2.39028	1.06352	0.418144	0.890914	1.64335	1.26919	0.655346	0.113503	0.0367568	0.0427022	1.99705	2.27813	1.6076
chr1	59529027	59530027	p300_1369:::chr1:::59529527	75.3275	86.4632	1.14783	0.198909	0.459861	0.798109	4.59328	4.81093	2.2578	3.53449	0.668892	3.0381	0.25522	1.27949	0.0980183	0.0996385	13.3989	7.86613	4.11175
chr1	59531676	59532676	DHS_6771:::chr1:::59532176	17.0847	17.3862	1.01765	0.025235	1	1	3.72975	1.93283	0.805988	1.04999	1.61154	1.06862	0.507955	0.288918	0.0183784	0.0142341	2.43875	1.41145	1.49937
chr1	59548173	59549173	DHS_6781:::chr1:::59548673	183.022	160.941	0.879356	-0.18548	0.30252	0.623384	2.63881	2.19843	0.925941	1.50742	0.715829	1.90602	0.605491	3.10587	0.0306307	0.0427022	2.61335	1.94582	2.78416
chr1	59564959	59565959	p300_1376:::chr1:::59565459	33.0603	36.176	1.09424	0.129932	0.778288	1	2.78472	4.06778	2.54035	0.983041	2.92465	2.33244	0.836938	0.557199	0.00612614	0	3.07952	3.70323	2.91212
chr1	59784984	59785984	p300_1395:::chr1:::59785484	37.6082	52.2097	1.38825	0.47327	0.178306	0.447016	3.14372	2.18023	0.89219	1.57144	0.331787	1.61441	0.247437	0.639747	0.00612614	0.0711703	9.94256	7.45327	3.57765
chr1	59796012	59797012	DHS_6880:::chr1:::59796512	4.7702	48.7987	10.2299	3.35472	8.71513e-10	4.25451e-08	2.04472	1.55893	0.59725	1.621	0.639523	1.7136	0.448026	0.0825479	0.00612614	0	1.63134	1.68954	1.89735
chr1	59800218	59801218	DHS_6883:::chr1:::59800718	2.49625	40.9051	16.3866	4.03445	2.03222e-07	5.35465e-06	1.68844	0.607425	0.446409	0.985177	0.466458	1.13555	0.3846	0.041274	0	0	1.14165	1.26727	1.10144
chr1	59964039	59965039	DHS_6923:::chr1:::59964539	20.8569	41.7898	2.00364	1.00262	0.0139655	0.0693608	1.71783	0.885155	0.723103	0.997234	0.615042	1.05904	0.389214	0.350829	0.0183784	0.0142341	1.96565	1.82654	1.12506
chr1	60111209	60112209	DHS_6973:::chr1:::60111709	9.65156	10.9472	1.13424	0.181728	0.899882	1	1.83688	0.793751	0.517091	0.96512	0.908598	0.706283	0.360188	0.165096	0.0245046	0.0142341	1.64284	1.90162	2.36638
chr1	60625690	60626690	p300_1418:::chr1:::60626190	72.8313	83.8775	1.15167	0.203725	0.468088	0.807579	3.25319	4.05965	2.10502	1.18058	0.867752	1.47446	0.394162	1.23822	0.0122523	0.0284681	3.13028	5.10535	2.27378
chr1	60835173	60836173	p300_1419:::chr1:::60835673	4.71462	22.6004	4.79367	2.26113	0.00130964	0.0102243	2.94508	1.45682	0.659705	1.14696	0.501814	1.20143	0.589728	0.0825479	0	0	4.52064	3.34261	2.55267
chr1	60879478	60880478	p300_1423:::chr1:::60879978	10.4007	48.8753	4.69925	2.23243	1.21438e-06	2.58048e-05	2.2056	1.22327	0.695676	1.34971	0.438904	1.48336	0.591478	0.175414	0	0	4.20629	4.01313	3.38005
chr1	60889177	60890177	p300_1424:::chr1:::60889677	19.581	51.7418	2.64245	1.40188	0.00036879	0.00353859	4.44679	1.09664	0.44983	2.00967	0.345771	0.646749	0.47825	0.330192	0	0.0142341	5.22102	1.50915	2.21976
chr1	60893561	60894561	DHS_7109:::chr1:::60894061	7.90441	17.3096	2.18987	1.13085	0.0952284	0.291111	2.0653	0.477461	0.469309	0.919935	0.452183	0.739637	0.426793	0.13414	0	0	2.63123	2.94042	1.6879
chr1	60895742	60896742	p300_1425:::chr1:::60896242	9.18033	30.4429	3.3161	1.72949	0.00152958	0.01165	3.70451	0.911289	0.662062	2.10652	0.520393	0.927481	0.375768	0.154777	0.00612614	0	6.69062	9.61878	2.79169
chr1	60901887	60902887	DHS_7112:::chr1:::60902387	6.04612	20.8821	3.45381	1.78819	0.00792757	0.0444539	3.16077	0.74366	0.520595	1.04168	0.413215	0.832355	0.630659	0.103185	0	0	1.26903	2.77465	1.01057
chr1	60907451	60908451	p300_1426:::chr1:::60907951	125.666	164.71	1.3107	0.390332	0.050041	0.182829	9.00122	3.93214	1.33605	7.56394	0.326663	2.00537	0.290828	2.13593	0.0183784	0	19.7077	16.3779	6.71071
chr1	60909294	60910294	p300_1427:::chr1:::60909794	138.647	254.609	1.83638	0.876863	3.04414e-07	7.65729e-06	5.02039	6.48656	1.81279	6.06967	0.406482	3.49462	0.269016	2.3423	0.0122523	0.142341	8.95574	3.78739	4.36348
chr1	60912590	60913590	DHS_7121:::chr1:::60913090	19.581	41.994	2.14463	1.10073	0.00833727	0.0461965	4.07573	1.65129	0.736756	1.47051	0.341677	1.52321	0.471812	0.330192	0	0	2.66497	2.09763	1.80386
chr1	60914155	60915155	p300_1429:::chr1:::60914655	58.6318	114.899	1.95966	0.970607	0.000103432	0.00120711	3.55633	2.1237	0.843515	1.65512	0.438697	1.46336	0.724207	0.990575	0	0.0284681	12.538	7.40646	4.46671
chr1	60917154	60918154	DHS_7125:::chr1:::60917654	24.2956	34.2791	1.41091	0.496631	0.252855	0.562462	2.06637	1.48139	0.696769	1.54707	0.974933	1.84946	0.287376	0.41274	0.00612614	0.0142341	1.85045	2.87707	2.49688
chr1	61151929	61152929	DHS_7145:::chr1:::61152429	1.91387	1.66718	0.871105	-0.199081	1	1	3.02229	1.01447	0.561749	1.96007	0.754062	0.520778	1.07031	0.0309555	0.00612614	0	2.4702	1.94433	1.91792
chr1	61195737	61196737	DHS_7151:::chr1:::61196237	1.16476	7.24708	6.22194	2.63737	0.0673808	0.226701	2.2789	1.64109	0.683418	0.597008	1.02021	1.40618	0.54547	0.020637	0.00612614	0	2.1287	2.09441	1.97061
chr1	61474975	61475975	p300_1434:::chr1:::61475475	16.9736	43.0912	2.53872	1.3441	0.0017965	0.0133374	3.91611	3.80364	2.00408	1.02479	1.04532	1.70456	0.548418	0.288918	0.00612614	0	3.21031	4.56242	1.38475
chr1	61476470	61477470	p300_1435:::chr1:::61476970	66.8963	128.984	1.92813	0.947199	6.10056e-05	0.000768758	2.85118	5.41763	2.96493	1.43111	1.04967	2.50378	0.530793	1.13503	0.0245046	0.0142341	5.28213	5.84244	4.57746
chr1	61538252	61539252	p300_1436:::chr1:::61538752	1.80272	6.09879	3.38311	1.75835	0.2171	0.507306	2.33845	0.941633	0.45214	1.54135	0.859815	0.380041	0.892345	0.0309555	0.00612614	0.0711703	3.49262	1.33021	3.36445
chr1	61574731	61575731	DHS_7184:::chr1:::61575231	1.16476	12.0955	10.3845	3.37636	0.00400999	0.0257124	1.58795	1.699	1.01547	0.640794	0.887474	1.04423	1.24161	0.020637	0.00612614	0.0142341	1.04984	0.95347	1.44695
chr1	62694429	62695429	p300_1441:::chr1:::62694929	6.10169	4.48266	0.734658	-0.444855	0.738179	1	2.77079	2.29947	1.07856	1.29838	1.39471	0.920736	0.931283	0.103185	0	0	4.36731	2.31375	2.65853
chr1	62696746	62697746	p300_1442:::chr1:::62697246	2.49625	0.782542	0.313487	-1.67352	0.549488	0.869926	2.63453	1.18959	0.545957	1.05326	0.945728	0.443254	0.950738	0.041274	0	0	10.5742	6.32753	4.21029
chr1	62711179	62712179	p300_1443:::chr1:::62711679	34.2251	30.5789	0.893466	-0.162515	0.734149	1	3.26411	3.78203	1.81488	1.72351	0.97129	1.56634	0.84279	0.577836	0.00612614	0	4.92615	4.34359	4.24438
chr1	62724786	62725786	p300_1444:::chr1:::62725286	11.5099	14.0774	1.22307	0.290508	0.711869	0.98716	1.85621	1.61421	0.723998	2.16105	0.814552	0.725306	2.49224	0.196051	0	0	5.78983	3.55004	3.75865
chr1	62743231	62744231	DHS_7252:::chr1:::62743731	0.582381	2.03293	3.49072	1.80353	0.64417	0.934702	1.68205	1.10939	0.948872	0.875743	1.38897	0.97264	0.636771	0.0103185	0	0	0.951536	2.837	2.27321
chr1	62878315	62879315	DHS_7295:::chr1:::62878815	1.80272	1.19934	0.665294	-0.587936	0.9476	1	1.62969	0.699307	0.625137	0.897524	0.971156	0.732602	0.870899	0.0309555	0	0	2.3366	1.53264	1.34185
chr1	62957651	62958651	p300_1472:::chr1:::62958151	2.44068	4.04034	1.65542	0.727194	0.703321	0.979861	2.26025	0.924496	0.321835	0.877715	0.822556	0.563574	0.500668	0.041274	0	0	4.17018	2.84055	1.53269
chr1	62961048	62962048	DHS_7310:::chr1:::62961548	1.8583	4.45713	2.3985	1.26214	0.444928	0.783754	2.37212	0.668482	0.475326	0.742682	1.1329	0.554903	0.9565	0.0309555	0	0.0142341	1.77664	1.16535	1.59164
chr1	62973645	62974645	DHS_7312:::chr1:::62974145	0	2.39868	Inf	Inf	0.268691	0.578802	2.15431	0.601633	0.570391	0.802097	0.889446	0.674208	0.455257	0	0	0	1.06599	1.04882	0.848876
chr1	62996387	62997387	p300_1475:::chr1:::62996887	13.646	14.9365	1.09457	0.130359	0.856393	1	1.6497	0.921651	0.475326	1.33683	0.737589	0.873973	0.744967	0.227007	0.0122523	0	4.26395	4.42834	2.12219
chr1	63013157	63014157	DHS_7322:::chr1:::63013657	17.8894	41.9685	2.34599	1.2302	0.00354117	0.0232784	2.23195	2.84176	2.30533	1.02085	0.759283	1.39836	0.546309	0.299236	0.0122523	0	2.22081	2.56377	2.86496
chr1	63032515	63033515	DHS_7327:::chr1:::63033015	12.259	33.6241	2.74282	1.45566	0.00330113	0.0219672	1.74389	2.12906	1.31763	0.940963	0.684312	1.14571	0.450997	0.20637	0.0183784	0	1.78318	3.676	3.09356
chr1	63449918	63450918	p300_1508:::chr1:::63450418	1.22034	1.25039	1.02462	0.0350949	1	1	1.59859	0.558932	0.613207	1.01306	0.694284	0.817741	0.476425	0.020637	0.00612614	0.0284681	1.93939	1.73468	2.31659
chr1	63478111	63479111	p300_1511:::chr1:::63478611	30.2862	49.76	1.64299	0.716326	0.0525331	0.189584	7.12609	3.55484	1.10739	3.36363	0.56606	1.60564	0.26998	0.515925	0.0245046	0.0284681	5.79479	3.69237	3.5598
chr1	63999753	64000753	p300_1527:::chr1:::64000253	6.6285	14.1539	2.13532	1.09445	0.155929	0.4089	1.76028	2.59289	1.36518	0.906292	0.819824	1.35887	0.825816	0.113503	0	0	2.68562	2.70109	4.22382
chr1	64040515	64041515	DHS_7565:::chr1:::64041015	20.5235	11.7042	0.570285	-0.810245	0.151984	0.401418	1.64626	1.95914	0.8984	1.03085	0.73505	0.644632	1.39659	0.350829	0.0183784	0	1.55614	1.7191	1.22289
chr1	64055208	64056208	p300_1528:::chr1:::64055708	1.91387	5.63095	2.94217	1.55688	0.260006	0.572196	5.57369	1.16486	0.870711	1.17773	0.67941	0.649237	0.714114	0.0309555	0.00612614	0	3.04452	2.3413	2.38264
chr1	64253517	64254517	DHS_7605:::chr1:::64254017	2.3851	2.03293	0.852346	-0.230489	1	1	2.41093	1.10939	0.926886	1.57989	0.752052	0.360687	2.02061	0.041274	0.00612614	0	2.56626	2.01994	2.52894
chr1	64272319	64273319	p300_1533:::chr1:::64272819	254.773	281.854	1.10629	0.145736	0.337607	0.667196	3.35956	6.42313	2.24851	4.62469	0.471299	2.34495	0.481473	4.31313	0.0306307	0	14.3185	6.61518	9.22095
chr1	64340969	64341969	DHS_7616:::chr1:::64341469	4.18782	15.0641	3.59712	1.84684	0.025866	0.111535	2.79414	1.51281	0.510681	1.25346	0.967256	1.07312	0.69366	0.0722294	0.0122523	0.0569363	2.09967	1.12683	1.48203
chr1	64345104	64346104	p300_1535:::chr1:::64345604	15.1709	26.6662	1.75773	0.81371	0.115187	0.331967	3.59217	0.803841	0.654581	1.76733	0.782723	0.577711	0.77513	0.257962	0.0183784	0.0569363	4.8933	2.69611	4.50066
chr1	64347508	64348508	p300_1536:::chr1:::64348008	60.9347	80.1857	1.31593	0.396081	0.199559	0.480199	4.19587	2.01154	0.769576	2.97459	0.55784	1.37933	0.701609	1.02153	0.134775	0.0427022	7.52959	2.10873	3.84016
chr1	64348978	64349978	p300_1537:::chr1:::64349478	194.754	212.726	1.09228	0.127343	0.467662	0.807202	6.45813	3.35872	1.67236	5.76876	0.575682	2.97815	0.592328	3.30192	0.238919	0.170809	6.03896	3.47467	4.36607
chr1	64351790	64352790	p300_1538:::chr1:::64352290	412.17	350.089	0.84938	-0.235518	0.126556	0.355372	3.11913	4.96535	2.07974	7.91478	0.574991	3.23568	0.431818	6.96498	0.477839	0.241979	13.6037	5.39305	10.3122
chr1	64357624	64358624	p300_1539:::chr1:::64358124	7.37761	10.4794	1.42043	0.506324	0.557241	0.876284	2.72274	1.41268	0.62237	0.943386	0.978952	0.443723	0.727697	0.123822	0.00612614	0	3.4063	7.4113	3.72147
chr1	64384765	64385765	p300_1540:::chr1:::64385265	9.12475	22.8385	2.50292	1.32361	0.0259214	0.111731	2.86098	3.12017	1.93101	1.07207	1.23383	1.15935	0.903124	0.154777	0.00612614	0	3.09326	2.43475	3.20223
chr1	64462136	64463136	p300_1541:::chr1:::64462636	0.637958	1.22486	1.91998	0.941088	0.968565	1	1.90632	0.912169	0.411949	0.77239	0.752052	0.5771	0.86085	0.0103185	0	0	5.38915	1.68329	1.0218
chr1	64469441	64470441	p300_1543:::chr1:::64469941	1.22034	0	0	#NAME?	0.536748	0.857798	2.20769	0.693372	0.514937	1.11909	0.631606	0.811546	2.47719	0.020637	0	0	4.21028	4.41863	2.51458
chr1	64570919	64571919	p300_1545:::chr1:::64571419	86.7818	122.154	1.4076	0.493239	0.0309172	0.127611	2.42133	0.952827	0.548158	0.930095	0.540158	0.654473	0.702912	1.47554	0.0490091	0.0854044	2.32826	4.88696	2.11363
chr1	64670030	64671030	p300_1553:::chr1:::64670530	20.4413	22.0815	1.08024	0.111352	0.854469	1	2.64797	1.21924	0.428264	1.48082	0.674799	1.13563	0.561115	0.34051	0.0245046	0.0284681	2.51545	2.49993	1.91207
chr1	64701669	64702669	p300_1554:::chr1:::64702169	9.0136	10.7685	1.1947	0.256645	0.814144	1	4.26981	1.34031	0.531247	1.51555	0.72738	0.881317	0.525859	0.154777	0.00612614	0	3.6578	1.9194	2.93362
chr1	64705831	64706831	DHS_7677:::chr1:::64706331	7.84884	10.0115	1.27554	0.351108	0.722665	0.995167	3.90741	0.530153	0.218734	1.1185	0.892229	0.143637	0.618974	0.13414	0.00612614	0.0427022	0.919767	3.08354	1.03762
chr1	64786596	64787596	DHS_7703:::chr1:::64787096	13.3126	8.86322	0.665778	-0.586887	0.417087	0.75532	3.7548	1.02204	0.413571	0.908124	0.988178	0.690134	0.245715	0.227007	0.042883	0.0284681	1.1821	1.43146	1.79217
chr1	64799889	64800889	p300_1561:::chr1:::64800389	14.7552	50.0236	3.39023	1.76138	2.89633e-05	0.00040635	2.52307	2.41348	1.22766	0.993969	0.63968	0.730929	0.520216	0.247644	0.0122523	0	2.60025	2.80919	1.87273
chr1	64826068	64827068	p300_1562:::chr1:::64826568	76.1033	98.8223	1.29853	0.376879	0.140124	0.380855	1.94896	3.10896	2.03508	0.766293	1.31299	2.15764	0.579914	1.30013	0	0	1.86707	2.35862	1.81721
chr1	65022652	65023652	DHS_7742:::chr1:::65023152	13.4237	10.8451	0.807905	-0.307742	0.701132	0.978492	2.76075	1.62792	0.582102	1.14485	0.618195	1.34082	0.452258	0.227007	0	0	1.67365	2.63471	1.69929
chr1	65024489	65025489	DHS_7743:::chr1:::65024989	4.82578	5.99669	1.24264	0.313405	0.859792	1	1.8406	0.982087	0.455846	1.02304	0.641478	0.878066	0.546852	0.0825479	0	0	1.79849	3.60113	1.46988
chr1	65028400	65029400	p300_1568:::chr1:::65028900	1.8583	0	0	#NAME?	0.312391	0.637982	2.36396	0.734599	0.361847	0.896693	0.914657	0.526408	0.707681	0.0309555	0	0	7.28264	4.77689	1.55341
chr1	65083791	65084791	p300_1569:::chr1:::65084291	1.91387	11.3895	5.95103	2.57314	0.0143293	0.0707561	4.8246	0.763047	0.57271	1.95752	0.543403	0.285031	2.33059	0.0309555	0.00612614	0	5.74593	1.77361	2.08596
chr1	65087074	65088074	p300_1570:::chr1:::65087574	6.73965	20.2783	3.0088	1.58919	0.0165648	0.0793137	2.83202	1.55089	0.462392	1.48316	0.388496	0.905399	1.18587	0.113503	0.00612614	0	9.42709	6.49268	3.14359
chr1	65114183	65115183	p300_1574:::chr1:::65114683	4.88136	9.69681	1.9865	0.990228	0.294162	0.612391	3.65482	0.342406	0.432293	0.962236	0.446821	0.427481	3.36546	0.0825479	0	0	6.083	5.86033	2.15712
chr1	65338953	65339953	p300_1584:::chr1:::65339453	1.27592	0.808067	0.633324	-0.658985	1	1	3.73885	0.758757	0.320168	0.736735	0.51874	0.504588	0.847469	0.020637	0.0122523	0.0284681	5.26549	3.61078	2.78744
chr1	65846191	65847191	p300_1588:::chr1:::65846691	0.637958	4.50818	7.06659	2.82101	0.160386	0.416294	3.7127	1.20711	0.640336	1.53896	0.372616	0.403671	1.49422	0.0103185	0	0	7.18022	5.18068	3.64511
chr1	66219937	66220937	p300_1589:::chr1:::66220437	25.0447	10.9217	0.436087	-1.19731	0.0272745	0.116083	3.48642	1.80025	0.926886	1.20646	1.52547	0.737769	0.782591	0.423058	0	0.0142341	4.19934	3.71853	3.88747
chr1	67007108	67008108	p300_1603:::chr1:::67007608	16.3912	21.2223	1.29474	0.372662	0.50586	0.840201	5.47148	2.48657	0.994361	2.15494	0.713152	0.895499	0.700884	0.278599	0	0	8.05276	3.83093	4.06957
chr1	67009452	67010452	p300_1604:::chr1:::67009952	3.13421	7.7915	2.48595	1.3138	0.354691	0.689514	5.04614	1.14603	0.291474	1.01351	0.605277	1.22498	0.741062	0.0515925	0.0122523	0	5.99198	1.14336	1.36641
chr1	67034162	67035162	p300_1606:::chr1:::67034662	26.7363	59.882	2.23972	1.16332	0.00098234	0.00803694	1.86146	2.23358	1.67526	0.730259	1.24715	1.64473	0.851285	0.454014	0.00612614	0.0569363	3.49012	1.75062	1.28746
chr1	67353995	67354995	p300_1608:::chr1:::67354495	42.2962	23.7486	0.561484	-0.832683	0.0376961	0.14789	2.97313	2.98637	1.26925	2.73278	0.518306	0.596596	1.01208	0.711976	0.0306307	0.0427022	3.8702	6.22361	4.32468
chr1	67474763	67475763	p300_1609:::chr1:::67475263	0.582381	1.61613	2.77505	1.47251	0.795216	1	3.0456	0.886203	0.438763	0.523513	0.884439	0.614662	0.815006	0.0103185	0	0	3.14329	0.896425	1.7957
chr1	67982016	67983016	p300_1610:::chr1:::67982516	14.0061	45.8556	3.27397	1.71104	9.64266e-05	0.00113802	6.68665	2.164	0.559437	7.42482	0.342369	0.427481	0.779371	0.237325	0	0	8.83935	9.60097	4.88191
chr1	69506201	69507201	DHS_8063:::chr1:::69506701	0	1.19934	Inf	Inf	0.639786	0.933728	3.70673	0.451976	0.343291	1.46286	0.652823	0.240458	1.67388	0	0	0	2.13855	2.61845	2.89509
chr1	69513035	69514035	p300_1616:::chr1:::69513535	4.18782	1.61613	0.385913	-1.37365	0.390949	0.72471	2.91996	1.88846	0.555437	2.07693	1.02192	0.474162	0.82216	0.0722294	0	0.0142341	2.72485	1.87242	2.71235
chr1	69735289	69736289	DHS_8074:::chr1:::69735789	32.8936	22.158	0.673628	-0.569975	0.193944	0.474147	1.94804	1.76471	1.23585	0.984674	1.95446	0.785124	0.370366	0.557199	0.0245046	0	1.82622	3.38223	4.10619
chr1	69775606	69776606	DHS_8077:::chr1:::69776106	9.12475	24.6078	2.69681	1.43126	0.014256	0.0705047	2.7621	1.75168	0.42279	1.59652	0.630833	1.33264	0.97412	0.154777	0.00612614	0	1.33716	1.59469	1.52463
chr1	71064351	71065351	p300_1624:::chr1:::71064851	14.6441	33.9388	2.31758	1.21262	0.0108469	0.0568104	3.86224	0.89605	0.594158	0.899321	0.325407	0.39953	1.06779	0.247644	0.0122523	0.0284681	2.39847	3.61259	1.00804
chr1	71070155	71071155	DHS_8135:::chr1:::71070655	242.18	178.302	0.736236	-0.441759	0.00713092	0.0408601	1.81143	0.696928	0.448919	1.28281	0.355537	0.943336	0.67139	4.10676	0.0673875	0.170809	1.08573	2.20122	1.76849
chr1	71164734	71165734	p300_1629:::chr1:::71165234	1.80272	2.4242	1.34475	0.427335	0.981868	1	3.70219	1.07037	0.341566	0.793913	1.19752	0.685124	0.843547	0.0309555	0	0	5.57098	3.04514	1.73294
chr1	71475589	71476589	p300_1633:::chr1:::71476089	0	0.391271	Inf	Inf	1	1	2.72331	0.651549	0.228861	1.05326	0.634171	0.377863	1.17285	0	0	0	3.17728	0.801565	1.24075
chr1	71552121	71553121	DHS_8182:::chr1:::71552621	1.8583	4.48266	2.41224	1.27037	0.443789	0.783084	2.4903	1.33992	0.427999	0.943829	1.09267	0.955587	0.409929	0.0309555	0	0	0.999843	1.04932	1.37345
chr1	71553545	71554545	p300_1634:::chr1:::71554045	41.3804	69.3151	1.67507	0.744224	0.0158732	0.0766707	2.37647	1.92363	0.963735	0.927641	0.728766	0.794174	0.533095	0.701657	0.0183784	0.0142341	2.89588	3.98429	4.93555
chr1	71597119	71598119	p300_1637:::chr1:::71597619	33.2826	62.2978	1.87178	0.904412	0.0058875	0.0350513	2.37131	2.48988	0.97567	1.15225	0.689145	1.85496	0.671528	0.557199	0.00612614	0.0142341	4.68874	4.21454	3.52635
chr1	71719679	71720679	p300_1649:::chr1:::71720179	36.4434	18.8492	0.517218	-0.951156	0.0278381	0.117971	4.97364	2.85	0.79904	1.7524	0.38494	0.858187	0.265924	0.61911	0.0183784	0.0142341	27.4767	15.672	5.15302
chr1	71721677	71722677	DHS_8244:::chr1:::71722177	13.0081	7.66388	0.589163	-0.763261	0.343051	0.67466	2.54278	0.936052	0.651717	0.90103	0.82072	0.836907	0.43715	0.216688	0.042883	0.113873	1.62396	2.13041	2.42477
chr1	71738131	71739131	DHS_8246:::chr1:::71738631	4.82578	2.86652	0.594002	-0.75146	0.595912	0.91165	2.62086	1.10939	0.502961	1.48191	0.579342	0.956241	0.734058	0.0825479	0.0183784	0	1.34281	1.64414	1.76438
chr1	71787585	71788585	p300_1650:::chr1:::71788085	21.2726	20.6951	0.972852	-0.0397077	0.974404	1	1.70432	1.37756	0.716137	2.34367	0.494935	0.92441	0.819518	0.361147	0.0122523	0.0142341	6.42416	4.21379	3.38005
chr1	71846863	71847863	DHS_8262:::chr1:::71847363	0.582381	2.08398	3.57838	1.83931	0.730649	1	2.16592	0.516704	0.39502	0.894548	0.598808	0.59291	0.579796	0.0103185	0.00612614	0	1.47648	1.24517	1.07079
chr1	72084736	72085736	p300_1655:::chr1:::72085236	24.7668	50.1002	2.02287	1.01641	0.00803134	0.0448943	2.32541	3.09813	1.28141	1.31051	1.34512	0.658213	1.14053	0.423058	0.0673875	0	2.87374	2.79255	3.87764
chr1	72149429	72150429	DHS_8283:::chr1:::72149929	0	1.64166	Inf	Inf	0.474394	0.811819	1.7641	0.568227	0.527496	0.847745	0.619067	0.659794	1.1373	0	0	0	1.78387	1.10851	0.953261
chr1	72149618	72150618	DHS_8284:::chr1:::72150118	0	1.64166	Inf	Inf	0.474394	0.811819	1.85025	0.610167	0.463443	0.882104	0.658045	0.541031	1.03123	0	0	0.0142341	1.34729	1.38871	0.86214
chr1	72168115	72169115	DHS_8287:::chr1:::72168615	1.8583	4.04034	2.17422	1.12049	0.527485	0.854757	2.39999	2.5029	1.90903	1.05326	1.00885	2.19052	2.18712	0.0309555	0.00612614	0	1.68998	1.97068	3.2523
chr1	72260238	72261238	p300_1666:::chr1:::72260738	214.142	283.419	1.32351	0.404371	0.00878782	0.0481793	4.98592	4.79767	1.93193	7.29237	0.275962	3.76526	0.313317	3.62179	0.128649	0.0996385	19.8993	8.46062	5.20165
chr1	72266293	72267293	p300_1669:::chr1:::72266793	140.45	180.871	1.2878	0.364904	0.0495275	0.181403	3.05827	1.85205	0.902203	2.35895	0.470032	1.37717	0.189719	2.37325	0.128649	0.170809	3.6267	5.42547	3.30606
chr1	72275171	72276171	p300_1671:::chr1:::72275671	95.8533	192.967	2.01314	1.00945	3.45751e-05	0.000473668	4.28299	2.59886	0.629367	5.76366	0.361228	2.64504	0.817011	1.60968	0.0367568	0.0142341	16.752	12.1571	6.4288
chr1	72460849	72461849	p300_1687:::chr1:::72461349	1.22034	1.64166	1.34525	0.427874	1	1	1.5619	1.04006	0.551718	0.686499	0.53718	0.850191	0.736591	0.020637	0.00612614	0.0284681	1.99344	1.08211	0.944249
chr1	72462239	72463239	DHS_8389:::chr1:::72462739	1.16476	0.391271	0.335924	-1.57379	0.819427	1	1.68767	0.512028	0.45466	0.612933	0.532913	0.586268	0.676588	0.020637	0	0	1.23593	1.01335	1.01496
chr1	72613295	72614295	DHS_8409:::chr1:::72613795	4.41013	33.2329	7.53558	2.91372	2.3058e-06	4.52267e-05	1.82324	2.07708	0.992287	0.899498	1.37922	1.18474	0.581231	0.0722294	0.0122523	0	1.18011	1.10581	1.51032
chr1	72621401	72622401	DHS_8411:::chr1:::72621901	7.32203	18.2198	2.48835	1.31519	0.0521903	0.18873	1.95847	0.698221	0.648172	0.817564	1.64676	1.22583	0.564369	0.123822	0.00612614	0	1.45362	1.90694	2.45981
chr1	72623413	72624413	p300_1693:::chr1:::72623913	41.8516	46.0598	1.10055	0.138227	0.733625	1	2.93315	3.7041	1.88952	1.16642	2.53274	2.09258	0.681803	0.711976	0.0367568	0.0284681	2.92681	3.17181	4.37008
chr1	72625080	72626080	DHS_8413:::chr1:::72625580	18.0828	51.7163	2.85998	1.516	0.000187032	0.00199503	3.35345	2.39082	0.977728	1.03993	1.14236	1.60255	0.503979	0.309555	0.0735137	0.0142341	0.584718	2.01355	1.52784
chr1	72773287	72774287	p300_1705:::chr1:::72773787	20.2745	42.2576	2.08427	1.05954	0.00964371	0.0519729	2.35998	1.36671	0.681361	1.41769	0.686283	1.20961	0.621907	0.34051	0.0490091	0.0284681	2.01983	1.9585	1.78329
chr1	72811711	72812711	p300_1709:::chr1:::72812211	21.7994	84.6939	3.88516	1.95797	6.44727e-09	2.52472e-07	2.1456	2.9613	0.95689	0.912271	0.588466	1.9426	0.706078	0.371466	0	0.0569363	2.18233	2.78339	3.51192
chr1	72825219	72826219	p300_1710:::chr1:::72825719	28.6502	45.1752	1.57679	0.656987	0.0821479	0.261703	3.9199	1.95832	0.62688	3.2422	0.498643	1.48666	0.623804	0.484969	0.0122523	0.0142341	4.82011	3.24947	3.31861
chr1	72836909	72837909	p300_1711:::chr1:::72837409	96.9046	92.9022	0.958698	-0.0608521	0.785198	1	2.47719	3.98518	1.55685	1.91228	0.52375	2.36086	0.531044	1.65096	0.0367568	0.0427022	2.99953	1.96748	1.89895
chr1	72839489	72840489	p300_1713:::chr1:::72839989	18.8319	29.7198	1.57816	0.658248	0.162989	0.420274	2.95418	0.801748	0.501955	2.24813	0.454233	0.872924	0.789716	0.319873	0.00612614	0.0142341	10.2866	5.60152	2.04788
chr1	72843504	72844504	DHS_8475:::chr1:::72844004	38.6352	65.7937	1.70295	0.768033	0.0144436	0.0712143	2.89161	1.14056	0.555437	2.21007	0.400056	0.984798	1.04584	0.650065	0.00612614	0	2.14096	2.46819	3.75854
chr1	72852346	72853346	p300_1715:::chr1:::72852846	1133.72	1039.34	0.916757	-0.125389	0.187248	0.462407	3.64648	4.28372	1.27795	10.0175	0.319073	4.5494	0.329888	19.2027	0.50847	0.241979	31.8629	14.9653	9.83385
chr1	72859284	72860284	p300_1716:::chr1:::72859784	62.9308	75.9328	1.20661	0.270957	0.324696	0.654273	2.08638	1.70676	0.574353	2.23817	0.583021	1.37339	1.40026	1.0628	0.0367568	0.0142341	3.99745	4.66141	4.02332
chr1	72866255	72867255	DHS_8483:::chr1:::72866755	12.259	31.9059	2.60266	1.37999	0.00595937	0.0353891	2.33845	1.02822	0.828923	1.42575	1.0719	0.738969	0.874848	0.20637	0.0183784	0.0142341	4.13106	2.58651	2.13082
chr1	72926683	72927683	p300_1728:::chr1:::72927183	2.49625	2.841	1.1381	0.186633	1	1	1.81193	1.32356	0.7396	0.817394	1.38287	1.30349	0.531799	0.041274	0	0	4.36958	1.40382	2.66298
chr1	72991324	72992324	p300_1730:::chr1:::72991824	99.4009	94.782	0.953533	-0.0686451	0.766585	1	3.40614	6.27733	3.51873	1.95731	1.85663	2.52481	0.526075	1.69223	0.177658	0.0142341	12.703	7.0698	6.399
chr1	73006433	73007433	p300_1733:::chr1:::73006933	38.8285	45.0731	1.16082	0.215149	0.56738	0.885781	3.56288	2.62221	0.748999	3.78216	0.414483	0.806628	0.626073	0.660383	0.042883	0.0142341	24.4962	10.1915	4.68168
chr1	73009770	73010770	p300_1734:::chr1:::73010270	108.139	132.344	1.22384	0.291411	0.163558	0.421067	2.29645	4.65348	1.79457	2.02453	0.460181	2.27427	0.914976	1.82637	0.104144	0	8.78215	5.44296	5.24512
chr1	73082804	73083804	DHS_8525:::chr1:::73083304	5.82381	7.24708	1.24439	0.315437	0.927918	1	1.65694	1.04316	0.553365	1.02575	0.736618	0.654082	1.05197	0.103185	0.00612614	0	2.06833	1.35668	1.69854
chr1	73134756	73135756	p300_1735:::chr1:::73135256	1.22034	1.98188	1.62404	0.699588	0.901413	1	3.092	1.02782	0.72697	1.20815	0.794908	0.636507	1.09716	0.020637	0	0	7.47236	8.16889	2.09618
chr1	73409731	73410731	DHS_8550:::chr1:::73410231	3.54986	13.0822	3.68528	1.88177	0.126069	0.354348	3.08375	1.45075	0.871431	1.49887	1.83192	1.27628	1.08526	0.061911	0.00612614	0	1.97405	1.5538	2.94749
chr1	73546935	73547935	p300_1737:::chr1:::73547435	2.49625	6.07327	2.43295	1.28271	0.32322	0.652148	2.38768	1.2988	0.421997	2.34286	0.577796	0.348371	0.944836	0.041274	0	0	7.66124	4.43402	4.50836
chr1	73571739	73572739	p300_1739:::chr1:::73572239	25.7938	31.8548	1.23498	0.304486	0.476059	0.811819	3.30245	1.96903	0.614689	1.65433	0.70874	0.645838	0.766202	0.433377	0.00612614	0.0284681	3.26493	2.69678	1.80553
chr1	74225897	74226897	p300_1760:::chr1:::74226397	1.80272	4.8484	2.68949	1.42733	0.376737	0.711034	3.82283	0.829245	0.41611	1.2554	0.892587	1.07113	0.514481	0.0309555	0	0	3.57722	2.9585	2.04359
chr1	74251225	74252225	p300_1762:::chr1:::74251725	22.7152	66.7038	2.93653	1.55411	1.13325e-05	0.00018082	1.93293	0.722047	0.418932	1.1568	0.645299	1.45253	0.357472	0.381784	0.00612614	0	7.82928	1.54064	1.73013
chr1	74255227	74256227	DHS_8699:::chr1:::74255727	24.4624	58.4445	2.38916	1.2565	0.000501588	0.00458207	1.75287	1.30792	0.607083	0.931302	1.34578	1.77686	0.68717	0.41274	0	0	3.56576	1.48838	1.64563
chr1	74258753	74259753	DHS_8702:::chr1:::74259253	7.95999	7.6894	0.966007	-0.0498952	1	1	2.59126	1.66409	0.668026	1.38062	0.60342	1.1698	0.416853	0.13414	0	0	3.22517	3.00262	2.36118
chr1	74403793	74404793	DHS_8754:::chr1:::74404293	41.3804	59.2781	1.43252	0.518553	0.109609	0.321435	2.63277	0.894532	0.366358	1.21146	0.54063	0.795508	0.56993	0.701657	0.042883	0.0427022	2.37354	2.03591	2.01734
chr1	74447570	74448570	DHS_8778:::chr1:::74448070	13.257	38.2173	2.8828	1.52747	0.00122919	0.00969368	1.73251	1.70847	1.11226	1.09539	0.987068	1.92607	0.351514	0.227007	0.0245046	0	1.77072	1.71695	1.28746
chr1	74800402	74801402	p300_1802:::chr1:::74800902	10.7607	30.1621	2.80298	1.48696	0.00546209	0.0330023	1.56747	2.04044	0.825021	0.981511	0.968241	1.18526	0.4574	0.185733	0.0122523	0.0284681	2.45438	1.32094	2.33036
chr1	74854370	74855370	p300_1812:::chr1:::74854870	16.6691	49.1645	2.94944	1.56044	0.000140774	0.00157052	2.18666	7.03079	4.99489	0.947933	3.53406	2.23175	0.327302	0.278599	0.0183784	0.0142341	6.11092	4.03989	7.29945
chr1	74864749	74865749	DHS_8905:::chr1:::74865249	91.9411	146.354	1.59182	0.670677	0.00298937	0.020259	2.35143	1.55089	0.924784	1.12849	0.772196	0.99373	0.629533	1.55809	0.208289	0.185043	1.17839	2.78258	1.31374
chr1	74871101	74872101	p300_1814:::chr1:::74871601	115.101	214.589	1.86435	0.898674	1.11995e-06	2.40942e-05	4.22713	5.43662	1.89259	8.47018	0.597999	2.07348	0.371833	1.93988	0.422704	0.113873	21.4034	16.5773	7.40267
chr1	74876326	74877326	p300_1815:::chr1:::74876826	27.6521	58.8613	2.12863	1.08993	0.00175792	0.0130953	2.09054	2.95733	1.53598	0.920849	1.72838	1.40977	0.621042	0.464332	0.0183784	0.0569363	3.03552	3.46276	2.71944
chr1	74897646	74898646	p300_1818:::chr1:::74898146	56.8291	142.458	2.50678	1.32583	2.49361e-08	8.3965e-07	3.45592	6.0535	2.4993	3.25386	2.14139	1.82044	0.384499	0.95962	0.104144	0	7.67969	9.77392	5.30548
chr1	75230902	75231902	DHS_9022:::chr1:::75231402	73.1092	131.987	1.80534	0.852272	0.000200207	0.00210991	1.65822	1.29168	0.997781	1.0831	1.02661	1.28744	0.25606	1.23822	0.0245046	0.0427022	2.02829	3.26167	3.32156
chr1	75285636	75286636	DHS_9041:::chr1:::75286136	1.80272	1.19934	0.665294	-0.587936	0.9476	1	2.04573	0.82455	0.640192	0.711661	0.901954	1.28678	0.436242	0.0309555	0.0122523	0	0.728264	2.45669	0.621362
chr1	75286892	75287892	DHS_9043:::chr1:::75287392	0	1.19934	Inf	Inf	0.639786	0.933728	1.74528	0.850814	0.511065	0.902793	0.99661	0.903074	0.283174	0	0	0	1.12877	0.797346	1.29645
chr1	75339128	75340128	DHS_9059:::chr1:::75339628	7.26646	16.476	2.26741	1.18105	0.0933177	0.286892	2.83144	1.28505	0.909722	1.16736	0.88131	1.17223	0.233147	0.123822	0.0122523	0.0142341	2.05301	1.85162	1.95418
chr1	75340547	75341547	p300_1864:::chr1:::75341047	250.14	339.465	1.3571	0.440524	0.00243285	0.0171197	3.34453	8.096	4.26799	4.15915	0.6493	4.86173	0.260257	4.2409	0.165406	0.0142341	5.69352	4.43918	3.59292
chr1	75444445	75445445	p300_1885:::chr1:::75444945	13.9505	10.0881	0.723132	-0.467668	0.508678	0.843543	2.39733	5.45115	3.182	1.07075	4.89083	2.28635	0.600593	0.237325	0.0122523	0	4.60393	2.41588	1.74147
chr1	75514225	75515225	p300_1898:::chr1:::75514725	116.763	130.311	1.11603	0.158375	0.463479	0.802395	4.17338	5.09694	2.13747	4.54094	0.421255	4.73657	0.297778	1.98115	0.128649	0.0427022	8.06194	8.09883	6.50672
chr1	75579254	75580254	p300_1906:::chr1:::75579754	22.3817	41.6538	1.86106	0.896124	0.0306628	0.126802	3.23974	1.78712	0.721312	1.48768	0.746199	0.70734	0.452198	0.381784	0	0.0284681	2.78594	4.71582	4.07923
chr1	75585138	75586138	p300_1907:::chr1:::75585638	45.6793	121.049	2.64996	1.40597	7.55885e-08	2.23941e-06	3.52391	3.27285	1.26227	2.22911	0.897639	1.60382	0.403843	0.773887	0.0183784	0	12.2888	11.5871	5.34076
chr1	75591148	75592148	p300_1908:::chr1:::75591648	68.9769	77.685	1.12625	0.171521	0.518729	0.850634	2.52307	3.92036	2.12933	1.01056	0.876547	1.74007	0.416853	1.16599	0.0122523	0	3.06911	1.979	2.98254
chr1	75593912	75594912	DHS_9165:::chr1:::75594412	7.26646	6.46454	0.889641	-0.168704	0.928141	1	2.35897	0.825282	0.627972	1.20739	0.905672	1.21402	0.358688	0.123822	0.0183784	0.0569363	0.751102	1.97068	2.80371
chr1	75598052	75599052	p300_1909:::chr1:::75598552	97.4604	89.7465	0.920852	-0.11896	0.627453	0.933728	4.25661	4.21117	1.07191	1.71961	1.11273	1.58997	0.402609	1.65096	0.042883	0.142341	11.4696	14.5312	5.72414
chr1	75605200	75606200	p300_1910:::chr1:::75605700	150.684	216.936	1.43968	0.525744	0.00258836	0.0180145	2.11938	2.98427	1.58601	1.52722	0.841358	1.53653	0.810634	2.54867	0.0980183	0.0427022	2.61759	4.74687	4.87397
chr1	75609538	75610538	DHS_9171:::chr1:::75610038	18.0828	59.0484	3.26545	1.70728	3.71063e-05	0.000502831	2.11348	1.63167	0.782436	1.13875	0.814926	1.05396	0.824516	0.309555	0.0122523	0	1.94969	1.67236	0.985303
chr1	75649959	75650959	p300_1911:::chr1:::75650459	24.24	51.7929	2.13667	1.09536	0.00396815	0.02551	1.59592	2.95727	1.97289	1.04691	1.08306	2.50308	0.622301	0.41274	0.0183784	0	3.4088	4.74565	5.02742
chr1	75658937	75659937	p300_1913:::chr1:::75659437	34.7519	71.1099	2.04622	1.03296	0.00117907	0.00936619	3.60438	3.10079	0.9787	1.8939	0.788253	1.57269	1.02259	0.588154	0.00612614	0.0284681	8.53562	3.57568	2.78455
chr1	75664307	75665307	p300_1915:::chr1:::75664807	39.3287	39.5953	1.00678	0.00974583	0.99222	1	2.22684	2.07506	1.00069	1.97006	0.627978	1.18282	1.23725	0.660383	0.00612614	0	5.23642	2.82138	2.45727
chr1	75700982	75701982	p300_1917:::chr1:::75701482	79.322	178.234	2.24697	1.16798	1.03867e-07	2.96166e-06	3.49582	4.51109	1.50759	1.93203	1.24021	1.6622	0.693607	1.3414	0.0245046	0.0284681	5.21755	3.92429	5.06897
chr1	75798618	75799618	DHS_9214:::chr1:::75799118	4.29897	18.56	4.31731	2.11013	0.0048745	0.0300818	2.87772	1.79107	0.794119	1.47202	0.928738	0.808287	0.993954	0.0722294	0	0	3.33923	3.28545	2.43754
chr1	75800759	75801759	p300_1920:::chr1:::75801259	5.99054	15.6425	2.61119	1.38471	0.065466	0.222315	4.53421	1.38674	0.537325	1.4654	0.69483	0.823308	0.545829	0.103185	0.0183784	0.0427022	11.9666	10.8682	4.74802
chr1	75841331	75842331	p300_1921:::chr1:::75841831	8.01557	14.1284	1.76262	0.817723	0.256182	0.567119	2.02191	1.82366	1.18506	0.865692	0.820947	1.06724	1.00236	0.13414	0	0	2.53111	2.49034	1.13377
chr1	75859316	75860316	p300_1925:::chr1:::75859816	0	1.64166	Inf	Inf	0.474394	0.811819	3.90412	0.507986	0.292701	0.681846	0.623411	0.375874	2.38999	0	0.00612614	0	3.76836	2.87045	2.32324
chr1	75884485	75885485	p300_1926:::chr1:::75884985	6.79523	9.79891	1.44203	0.528099	0.568024	0.886421	4.0405	2.16747	0.659705	1.67547	0.732648	1.0397	0.574411	0.113503	0	0	5.0138	3.88174	2.65085
chr1	75897435	75898435	DHS_9233:::chr1:::75897935	1.8583	2.00741	1.08024	0.111352	1	1	2.39478	0.578202	0.523664	1.01755	0.585549	0.660241	0.683938	0.0309555	0.0122523	0	2.64238	1.41225	1.22745
chr1	75915413	75916413	p300_1929:::chr1:::75915913	0	1.22486	Inf	Inf	0.6354	0.933728	2.58583	0.927255	0.399652	0.675972	0.912003	0.678307	1.09212	0	0	0	7.12425	1.8089	1.16668
chr1	76021406	76022406	DHS_9248:::chr1:::76021906	0	1.22486	Inf	Inf	0.6354	0.933728	2.09054	0.507152	0.470799	0.902793	0.765481	0.680153	1.02482	0	0.00612614	0	0.989845	1.29854	1.18236
chr1	76025344	76026344	p300_1932:::chr1:::76025844	14.6441	20.8311	1.42249	0.508421	0.362282	0.693635	4.54346	2.16778	0.781283	4.10408	0.534864	1.06962	0.618427	0.247644	0.0122523	0	13.6277	10.0997	4.86234
chr1	76032647	76033647	p300_1933:::chr1:::76033147	4.88136	3.13017	0.64125	-0.641041	0.722378	0.994885	3.36409	1.25822	0.376783	1.83678	0.613335	0.712577	0.839854	0.0825479	0.00612614	0	9.29488	4.92669	2.63549
chr1	77256171	77257171	p300_1939:::chr1:::77256671	1.27592	1.22486	0.959988	-0.0589118	1	1	1.73719	0.641085	0.354547	0.789944	1.17893	0.718418	0.95258	0.020637	0	0	2.27177	2.48354	0.961074
chr1	77542040	77543040	DHS_9373:::chr1:::77542540	0	0.808067	Inf	Inf	0.844589	1	2.49407	0.516442	0.24859	0.726385	0.972481	0.2985	0.865798	0	0	0.0142341	0.796427	0.348266	0.713495
chr1	77625739	77626739	p300_1956:::chr1:::77626239	0.637958	2.4242	3.79994	1.92598	0.515749	0.848965	5.51995	1.65628	0.638231	1.34995	0.887103	0.365767	0.586025	0.0103185	0	0	2.49397	2.41824	1.29523
chr1	77968452	77969452	p300_1960:::chr1:::77968952	0	0.808067	Inf	Inf	0.844589	1	1.81501	2.19686	0.976955	0.799311	2.10678	0.769846	0.969732	0	0	0	4.83837	4.67062	4.14372
chr1	78304009	78305009	p300_1969:::chr1:::78304509	3.71659	4.01481	1.08024	0.111352	1	1	1.76511	0.83547	0.534008	0.858211	2.99428	0.854962	0.681949	0.061911	0	0	2.47122	2.49376	1.13533
chr1	78564295	78565295	p300_1980:::chr1:::78564795	0.582381	13.7371	23.5879	4.55998	0.000424997	0.00398665	1.94763	0.829127	0.585402	1.65195	0.964803	1.45794	0.996774	0.0103185	0.0367568	0.0284681	3.56576	2.65782	1.83923
chr1	78565926	78566926	DHS_9507:::chr1:::78566426	1.80272	8.88874	4.93074	2.3018	0.0541366	0.193648	1.84506	0.601126	0.40832	0.807344	1.11814	0.915224	0.692093	0.0309555	0.0122523	0.0711703	1.93318	1.60172	0.972281
chr1	78598271	78599271	p300_1983:::chr1:::78598771	131.963	208.047	1.57656	0.656776	0.000277702	0.00278694	4.53776	3.46479	0.968388	5.35275	0.415663	1.98647	0.417577	2.22879	0.0245046	0.128107	9.47985	6.67034	5.81623
chr1	78612176	78613176	DHS_9514:::chr1:::78612676	1.22034	8.39537	6.87954	2.78231	0.0341702	0.137555	1.91175	0.689095	0.62609	0.821263	0.608764	0.715019	0.957554	0.020637	0	0	1.42445	2.40258	1.39765
chr1	78645469	78646469	DHS_9518:::chr1:::78645969	4.18782	4.09139	0.976973	-0.0336095	1	1	2.24273	1.78736	0.686582	1.87246	0.665879	1.052	0.288943	0.0722294	0.0122523	0	1.06928	1.82356	2.17132
chr1	79374700	79375700	p300_1990:::chr1:::79375200	4.99251	15.4043	3.08549	1.6255	0.0337331	0.136404	4.26981	0.945283	0.658144	1.234	0.675845	0.768328	0.878678	0.0825479	0.00612614	0	4.23661	4.66141	3.18329
chr1	79446518	79447518	DHS_9560:::chr1:::79447018	15.1153	14.5707	0.963973	-0.052935	0.972232	1	2.18983	4.12883	3.20621	1.04332	3.01974	1.16373	1.17758	0.257962	0.00612614	0	2.1789	2.85841	1.56161
chr1	79450577	79451577	p300_1992:::chr1:::79451077	1.16476	1.59061	1.36561	0.449545	1	1	2.82066	0.887516	0.982341	1.52317	1.56195	0.699178	1.36853	0.020637	0	0	5.09305	2.64146	3.18329
chr1	79577705	79578705	p300_1993:::chr1:::79578205	9.81829	21.0608	2.14506	1.10102	0.0676186	0.227288	2.57287	3.19681	1.64644	1.32004	1.24775	0.747477	0.700857	0.165096	0.00612614	0.0142341	2.96302	1.8937	2.45029
chr1	79871023	79872023	DHS_9604:::chr1:::79871523	3.66102	14.256	3.89401	1.96126	0.0223234	0.0998076	1.84294	0.882692	0.671657	0.961671	0.882843	1.12911	1.33806	0.061911	0	0	1.20503	1.71256	1.73927
chr1	80146983	80147983	p300_2000:::chr1:::80147483	28.6502	43.6612	1.52394	0.607807	0.113611	0.328782	2.22108	3.18683	2.12337	1.90319	0.544439	1.55416	1.22148	0.484969	0.00612614	0	3.83453	5.03036	3.14232
chr1	80233515	80234515	p300_2003:::chr1:::80234015	1.22034	7.76598	6.36379	2.66989	0.0519781	0.188193	4.52575	1.56009	0.540684	1.48114	1.09283	0.649237	0.786871	0.020637	0	0	4.61927	3.40866	2.41399
chr1	80235779	80236779	DHS_9638:::chr1:::80236279	4.18782	15.0386	3.59103	1.8444	0.0259553	0.111839	2.12554	2.15101	1.13253	0.650243	1.75015	1.18992	1.32172	0.0722294	0	0	2.00515	0.974249	2.9274
chr1	80258235	80259235	DHS_9642:::chr1:::80258735	214.335	185.43	0.865141	-0.208993	0.227009	0.522647	4.43529	1.03349	0.520357	1.03108	0.445294	0.88843	0.453079	3.63211	0.232793	0.284681	0.972479	2.23257	1.96023
chr1	80399740	80400740	p300_2009:::chr1:::80400240	0	2.841	Inf	Inf	0.197834	0.478357	3.87359	0.731924	0.41024	0.734222	0.579251	0.619604	0.634029	0	0	0	6.61265	6.6633	2.06055
chr1	81573943	81574943	DHS_9715:::chr1:::81574443	0.582381	1.98188	3.40307	1.76684	0.64868	0.937611	3.22302	0.708581	0.239196	1.30468	0.90974	0.460749	2.5409	0.0103185	0	0	2.98018	2.54122	2.66985
chr1	81714526	81715526	DHS_9731:::chr1:::81715026	4.7702	10.2157	2.14157	1.09867	0.316042	0.642137	6.68837	0.964977	0.292508	1.75751	0.567376	0.460997	0.955085	0.0825479	0	0	2.7333	2.3307	3.42815
chr1	82004031	82005031	p300_2016:::chr1:::82004531	0	0	NA	NA	NA	NA	2.83491	0.916186	0.381863	1.08284	0.800111	0.401214	0.846341	0	0	0	6.87701	3.57462	3.87479
chr1	82289010	82290010	p300_2020:::chr1:::82289510	199.94	119.075	0.595554	-0.747695	4.94448e-05	0.000642299	2.86306	7.03404	6.33263	1.03085	2.77019	1.79576	0.282371	3.39478	0.153154	0.0569363	3.19418	6.23174	4.74483
chr1	82816558	82817558	p300_2027:::chr1:::82817058	110.106	119.126	1.08192	0.113596	0.651563	0.940086	4.07149	5.13225	2.59875	3.42555	0.456854	3.2563	0.254769	1.87797	0.0306307	0	11.5842	7.92875	4.34024
chr1	82823231	82824231	p300_2029:::chr1:::82823731	51.0319	38.447	0.753391	-0.408528	0.223678	0.517423	3.13392	2.02027	0.780536	1.54108	0.450241	1.38959	0.672067	0.866753	0.0367568	0	11.2645	6.27246	7.64733
chr1	83531744	83532744	p300_2042:::chr1:::83532244	0	6.04774	Inf	Inf	0.0188307	0.0875754	6.01429	1.12229	0.502961	1.72685	0.631264	0.566195	0.938427	0	0.00612614	0	10.6082	5.28474	2.64657
chr1	84705676	84706676	p300_2070:::chr1:::84706176	5.35258	23.0937	4.3145	2.10919	0.00190137	0.013948	2.19551	4.34416	3.27391	0.864781	2.64702	2.48305	0.611657	0.0928664	0	0	2.18808	1.48838	2.12964
chr1	87654612	87655612	p300_2098:::chr1:::87655112	23.242	64.8325	2.78945	1.47998	3.02845e-05	0.00042256	3.02768	5.43603	3.20405	1.73203	1.01318	2.59695	1.41084	0.392103	0.00612614	0	2.65181	2.3566	3.5252
chr1	87783640	87784640	p300_2105:::chr1:::87784140	0.637958	4.87393	7.63989	2.93355	0.126983	0.356124	1.71901	0.877763	0.701672	1.06483	0.475197	0.808574	0.811974	0.0103185	0.00612614	0	1.77664	1.77577	1.81902
chr1	87934758	87935758	DHS_10543:::chr1:::87935258	8.65353	40.9223	4.72897	2.24153	8.24734e-06	0.000137298	2.03028	0.611034	0.748267	1.27132	1.32197	1.47093	0.756607	0.144459	0	0	2.43595	2.13041	2.47865
chr1	87955733	87956733	p300_2115:::chr1:::87956233	472.491	347.333	0.735109	-0.443969	0.000484343	0.00444866	2.99702	4.78082	3.90897	2.54004	0.444064	4.94998	0.208078	8.00715	0.171532	0.0569363	6.95443	6.36115	4.34404
chr1	87958921	87959921	p300_2116:::chr1:::87959421	85.9505	84.5069	0.983204	-0.024438	0.945958	1	4.16269	2.14307	1.02682	2.81286	0.322188	2.1577	0.523663	1.45491	0.042883	0.0427022	5.75696	5.3046	3.84765
chr1	88047247	88048247	DHS_10577:::chr1:::88047747	148.879	105.882	0.711197	-0.491678	0.0349836	0.139871	1.95181	2.19786	0.971579	2.03696	0.399084	2.06204	0.385758	2.53835	0.0245046	0.0427022	1.81575	2.76313	1.86526
chr1	88048849	88049849	DHS_10578:::chr1:::88049349	75.0786	58.6232	0.780824	-0.356931	0.204622	0.487656	1.99813	1.0945	0.705014	1.24058	0.411673	1.39433	0.541642	1.26917	0.0551353	0.113873	1.86011	1.83015	1.43497
chr1	88180566	88181566	DHS_10624:::chr1:::88181066	20.8013	64.067	3.07995	1.62291	9.75718e-06	0.000158514	2.26907	2.37887	0.974578	1.90859	0.501578	1.1329	0.462201	0.350829	0.0245046	0.0427022	2.09262	1.6268	1.71271
chr1	88182689	88183689	DHS_10626:::chr1:::88183189	6.21285	21.5542	3.46929	1.79464	0.00947481	0.0512442	2.14079	1.51281	0.561749	1.72351	0.394067	0.852533	0.499989	0.103185	0.0183784	0.0284681	1.63308	1.83631	1.71847
chr1	88190892	88191892	p300_2130:::chr1:::88191392	103.035	129.24	1.25433	0.326912	0.129592	0.360399	2.74718	4.6442	2.01843	1.71117	0.460605	2.77181	0.234329	1.74383	0.122523	0.128107	6.75023	6.33765	5.05921
chr1	88197582	88198582	p300_2133:::chr1:::88198082	94.215	74.053	0.786	-0.347398	0.157002	0.410826	4.86053	4.49879	1.77564	2.98544	0.551072	2.97007	0.331477	1.59937	0.245046	0.199277	9.87569	3.69162	3.55162
chr1	88207157	88208157	p300_2137:::chr1:::88207657	646.113	591.046	0.914772	-0.128516	0.252567	0.562067	3.30831	7.412	5.17039	13.7515	0.294969	5.81332	0.757636	10.9376	0.336938	0.355852	38.71	16.5409	10.8735
chr1	88209655	88210655	p300_2139:::chr1:::88210155	100.788	116.43	1.1552	0.208139	0.477471	0.811819	4.69305	4.37613	1.87359	2.90183	0.398774	3.33136	0.702735	1.71287	0.0673875	0.128107	12.8612	4.15178	3.78035
chr1	88232629	88233629	p300_2140:::chr1:::88233129	4.29897	8.93979	2.07952	1.05625	0.290805	0.608641	2.15302	1.17596	0.617924	1.21125	0.629843	1.16863	0.494989	0.0722294	0	0.0142341	2.46361	1.41396	1.37942
chr1	88235684	88236684	DHS_10649:::chr1:::88236184	9.59598	26.1218	2.72216	1.44475	0.011564	0.0598573	1.51384	0.974683	0.68413	1.77173	0.453245	1.20573	0.222899	0.165096	0.00612614	0.0284681	2.14466	1.83959	3.64562
chr1	88277084	88278084	p300_2146:::chr1:::88277584	155.732	342.893	2.20181	1.13869	4.8686e-13	4.73875e-11	1.77949	3.70543	3.57991	1.66346	0.554093	2.73105	0.271049	2.63122	0.0735137	0.0711703	5.06142	5.2661	4.20429
chr1	88312103	88313103	p300_2150:::chr1:::88312603	7.32203	20.1251	2.74857	1.45868	0.0250052	0.108714	1.57201	1.77296	1.09725	0.97451	0.680888	1.15285	0.341926	0.123822	0.00612614	0.0284681	2.6622	2.07658	1.46107
chr1	88317216	88318216	p300_2151:::chr1:::88317716	60.1567	103.875	1.72674	0.788051	0.00217496	0.0156166	2.14729	3.53051	1.31473	1.24854	0.634329	2.64431	0.372861	1.02153	0.0673875	0.0996385	3.01867	2.85494	1.5094
chr1	88321132	88322132	DHS_10679:::chr1:::88321632	170.263	210.361	1.23551	0.305106	0.0866318	0.271191	1.88389	4.68608	2.241	1.71049	0.620443	3.02977	0.321384	2.8995	0.0490091	0.0569363	2.40202	2.18154	2.24386
chr1	88336744	88337744	p300_2156:::chr1:::88337244	360.331	343.76	0.954012	-0.0679208	0.627997	0.933728	2.19135	7.2398	5.42838	4.99773	0.235952	7.64341	0.184345	6.10855	0.26955	0.256213	4.92293	5.43212	7.85887
chr1	88344143	88345143	p300_2159:::chr1:::88344643	198.386	212.913	1.07323	0.101953	0.580498	0.898026	2.74754	5.12848	2.94668	3.27222	0.516868	4.52849	0.336988	3.37415	0.183784	0.213511	4.43845	2.69565	4.27082
chr1	88346250	88347250	p300_2160:::chr1:::88346750	102.98	114.533	1.11219	0.153403	0.508202	0.842993	2.78351	3.14567	1.11625	3.53691	0.436675	1.63356	0.423483	1.74383	0.0673875	0.313149	5.0663	4.496	5.20621
chr1	88353151	88354151	DHS_10691:::chr1:::88353651	161.805	231.847	1.43288	0.518919	0.00238914	0.0168707	2.9151	4.70719	2.06795	3.48708	0.359547	2.97459	0.308671	2.74472	0.0367568	0.213511	3.86473	3.62141	4.06683
chr1	88361533	88362533	DHS_10694:::chr1:::88362033	115.71	197.917	1.71046	0.774382	0.000132685	0.00149414	3.08753	2.72714	1.11593	2.82762	0.288861	4.37491	0.498875	1.96051	0.042883	0.0569363	1.4941	1.87838	2.23087
chr1	88367193	88368193	DHS_10696:::chr1:::88367693	254.024	299.64	1.17957	0.238266	0.108102	0.318232	3.19297	6.52423	3.51128	5.75503	0.265924	4.3014	0.181569	4.30281	0.165406	0.241979	3.89715	3.60883	3.79941
chr1	88378549	88379549	p300_2163:::chr1:::88379049	99.6521	156.042	1.56587	0.646962	0.00157623	0.011948	3.35952	3.85274	1.27615	2.58449	0.348692	2.94627	0.327497	1.68191	0.0306307	0.0142341	3.38914	3.45806	2.73636
chr1	88388294	88389294	p300_2167:::chr1:::88388794	319.506	291.729	0.913063	-0.131214	0.356067	0.689859	3.74604	4.3964	1.41664	3.7186	0.246305	4.43693	0.31953	5.40689	0.0980183	0.0996385	12.8593	9.85715	3.46362
chr1	88390224	88391224	DHS_10711:::chr1:::88390724	57.8827	66.3892	1.14696	0.197815	0.517741	0.850155	3.36936	2.2014	0.639232	2.20887	0.380151	2.7272	0.323831	0.980257	0.0612614	0.0711703	4.27174	5.41396	2.24859
chr1	88394374	88395374	p300_2169:::chr1:::88394874	187.819	223.971	1.19248	0.253969	0.142129	0.384873	3.86582	3.3139	0.848651	5.38382	0.217869	2.6889	0.314044	3.19873	0.0612614	0.0996385	8.37615	7.67232	3.96658
chr1	88397861	88398861	DHS_10716:::chr1:::88398361	286.862	279.123	0.973024	-0.0394524	0.795713	1	2.84094	7.14774	4.23302	6.56835	0.199856	6.56905	0.190641	4.86001	0.34919	0.298915	4.00095	3.99615	4.01879
chr1	88401671	88402671	p300_2172:::chr1:::88402171	601.209	510.834	0.849678	-0.235011	0.0424896	0.162231	3.29681	8.4314	6.83836	6.65659	0.269485	9.37787	0.1913	10.1844	0.520722	0.284681	5.2865	5.92517	3.9237
chr1	88405647	88406647	p300_2173:::chr1:::88406147	327.218	315.844	0.965241	-0.0510385	0.733335	1	3.38783	3.58988	1.50744	4.01342	0.24165	3.99228	0.221287	5.53071	0.110271	0.213511	12.0604	8.43001	12.1534
chr1	88408466	88409466	DHS_10725:::chr1:::88408966	90.7763	131.579	1.44949	0.535541	0.0157093	0.0761178	2.81907	2.41712	1.03563	2.10063	0.362371	2.90162	0.258496	1.53746	0.042883	0.113873	1.93545	3.55465	2.5816
chr1	88418620	88419620	p300_2175:::chr1:::88419120	332.708	339.711	1.02105	0.0300536	0.827975	1	3.10116	7.18375	3.21532	3.14624	0.259675	7.04846	0.211987	5.6339	0.441082	0.298915	4.45112	3.11426	6.11436
chr1	88420010	88421010	p300_2176:::chr1:::88420510	231.42	241.459	1.04338	0.0612662	0.710519	0.98587	3.90828	2.87137	1.69626	2.74931	0.29377	5.82404	0.237367	3.92103	0.165406	0.213511	5.09479	3.19329	1.92714
chr1	88430011	88431011	DHS_10734:::chr1:::88430511	110.246	205.861	1.86729	0.900945	1.92589e-06	3.85938e-05	1.67623	0.817651	0.940784	0.984013	0.322029	1.25804	0.424468	1.86765	0.0918921	0.128107	1.35861	3.35492	1.86151
chr1	88531017	88532017	DHS_10763:::chr1:::88531517	10.1784	26.5896	2.61237	1.38536	0.0141137	0.0699436	1.98852	1.66409	0.942596	1.59328	0.549699	0.687751	0.392125	0.175414	0.0122523	0	1.17439	1.15548	2.45491
chr1	88543796	88544796	p300_2186:::chr1:::88544296	21.3837	24.0889	1.12651	0.171854	0.743992	1	2.89604	2.05479	0.913453	1.80428	0.465945	0.959742	0.274474	0.361147	0.00612614	0	8.56909	7.64066	2.1591
chr1	88549609	88550609	p300_2188:::chr1:::88550109	9.34706	14.1029	1.50881	0.593406	0.38474	0.719482	1.96453	3.49756	1.65094	1.48743	0.807307	1.53636	0.35595	0.154777	0.00612614	0	3.76124	5.85938	1.71989
chr1	89072060	89073060	p300_2209:::chr1:::89072560	70.364	80.2878	1.14104	0.190344	0.465392	0.804673	1.55266	4.40913	2.72872	1.2243	1.01639	1.97916	0.367885	1.18663	0.042883	0.0284681	4.86932	6.47418	3.69418
chr1	89154783	89155783	p300_2220:::chr1:::89155283	30.3417	61.5663	2.0291	1.02084	0.00306673	0.020696	1.97068	4.19469	2.24866	1.20595	2.91615	1.69032	0.573051	0.515925	0.0673875	0.0284681	2.7333	3.85463	2.61193
chr1	89619616	89620616	DHS_11021:::chr1:::89620116	33.4204	80.492	2.40847	1.26812	4.83365e-05	0.000630245	2.25505	0.816807	0.497961	1.13428	0.748953	1.07017	0.843507	0.567517	0.0122523	0	1.26903	2.66366	0.858982
chr1	89625308	89626308	p300_2246:::chr1:::89625808	11.4543	35.5039	3.09962	1.63209	0.00108725	0.00874616	4.69865	2.97942	1.22105	2.07183	0.409519	0.816406	0.457488	0.196051	0.0306307	0.0427022	12.4471	10.3416	3.55181
chr1	90328748	90329748	p300_2265:::chr1:::90329248	4.93693	17.2586	3.49581	1.80563	0.0145679	0.0716752	2.15621	1.30362	0.605089	1.76272	0.523033	1.00179	0.530049	0.0825479	0.0122523	0.0427022	2.26166	6.3835	2.82434
chr1	90330354	90331354	p300_2266:::chr1:::90330854	9.70713	28.2313	2.90831	1.54018	0.00533034	0.032327	1.5801	0.941305	0.540944	0.872396	0.56024	0.896253	0.53622	0.165096	0.00612614	0	2.33297	1.12219	1.85781
chr1	90343777	90344777	p300_2267:::chr1:::90344277	23.1309	43.0146	1.85962	0.895009	0.0252292	0.109462	2.83845	1.69183	0.746658	1.55356	0.546413	1.24437	0.358688	0.392103	0.00612614	0	3.27199	3.78739	4.0808
chr1	90355473	90356473	DHS_11159:::chr1:::90355973	106.807	203.607	1.9063	0.930778	1.11699e-06	2.40413e-05	1.83761	2.01038	0.803658	2.27394	0.448297	1.65124	0.796162	1.80574	0.0551353	0.0284681	2.73685	4.11578	2.75087
chr1	90358675	90359675	DHS_11161:::chr1:::90359175	74.9385	123.617	1.64958	0.7221	0.00264536	0.0183505	2.35189	1.9439	1.00253	1.50066	0.407639	1.99176	0.6158	1.27949	0.0980183	0.142341	2.52084	2.68134	2.6856
chr1	90360808	90361808	p300_2270:::chr1:::90361308	208.982	393.699	1.88388	0.913711	2.92068e-10	1.59922e-08	3.84085	2.04567	0.570694	2.39499	0.449075	1.55073	0.500335	3.53924	0.0306307	0.170809	10.2242	5.69315	5.05203
chr1	90362951	90363951	p300_2272:::chr1:::90363451	52.7791	105.984	2.00808	1.00581	0.000135918	0.00152618	2.83845	1.506	0.803301	1.97486	0.377201	1.24978	0.672539	0.897709	0.0367568	0.0711703	4.27283	5.45385	2.41399
chr1	90377647	90378647	DHS_11169:::chr1:::90378147	4.29897	18.7132	4.35294	2.12199	0.00475714	0.0295266	1.59859	0.825695	0.424528	0.892456	1.07103	1.04076	0.550353	0.0722294	0	0.0142341	1.32231	2.7755	1.1583
chr1	90386371	90387371	p300_2274:::chr1:::90386871	121.007	234.646	1.93911	0.955396	1.45036e-07	3.97073e-06	1.6972	2.81846	1.81852	1.60361	1.01629	1.57923	1.53816	2.05338	0.0735137	0	2.49691	8.73489	6.75214
chr1	90471547	90472547	p300_2276:::chr1:::90472047	18.2495	20.2527	1.10977	0.150259	0.834941	1	1.77371	2.1402	1.06074	1.27424	0.745392	1.43292	0.774061	0.309555	0.00612614	0	3.71304	3.71516	2.2176
chr1	90504439	90505439	p300_2280:::chr1:::90504939	189.624	215.524	1.13659	0.184711	0.270445	0.581432	3.16144	4.78176	2.40097	7.05239	0.726285	2.97241	0.531549	3.20905	0.171532	0.0284681	12.3134	7.48353	7.68655
chr1	90509232	90510232	p300_2282:::chr1:::90509732	58.1872	89.1766	1.53258	0.615963	0.0230576	0.102253	1.86227	1.84239	1.01148	4.11899	0.625311	1.50716	0.416334	0.990575	0.0367568	0	15.5351	9.82919	6.28131
chr1	90535643	90536643	p300_2286:::chr1:::90536143	109.968	62.9272	0.57223	-0.805332	0.000955823	0.00785886	2.10036	3.87707	1.74701	4.49979	0.741962	1.27468	0.461975	1.86765	0.122523	0.0142341	5.92525	2.06225	2.70829
chr1	90560919	90561919	DHS_11203:::chr1:::90561419	14.6441	30.2132	2.06317	1.04486	0.0336101	0.13613	2.96727	1.38284	0.71801	1.34624	1.61367	0.457209	1.2352	0.247644	0.0367568	0.0284681	2.43976	4.48086	2.57428
chr1	90565414	90566414	p300_2292:::chr1:::90565914	71.1953	82.0571	1.15256	0.204847	0.453405	0.791112	3.92937	6.27445	1.92468	8.00304	1.23287	1.84483	0.417489	1.20726	0.0490091	0.0284681	21.5188	11.921	4.03274
chr1	90574725	90575725	p300_2295:::chr1:::90575225	3.60544	1.22486	0.339727	-1.55755	0.392441	0.726349	1.75764	1.04707	0.509151	0.686393	1.45763	0.924008	0.765738	0.061911	0.00612614	0	4.75768	2.72352	1.49825
chr1	90602060	90603060	p300_2301:::chr1:::90602560	52.0033	68.9665	1.32619	0.407292	0.190351	0.467984	1.85252	4.43758	2.35201	1.61547	0.485912	2.50044	0.285981	0.877072	0.0490091	0.0427022	5.46198	3.88976	6.49324
chr1	90623652	90624652	p300_2302:::chr1:::90624152	0.637958	2.81547	4.41326	2.14184	0.413929	0.752706	2.06687	0.663181	0.433231	0.909456	0.437078	0.646841	0.913264	0.0103185	0.0122523	0	5.88063	1.11805	2.13785
chr1	90646391	90647391	DHS_11233:::chr1:::90646891	21.1614	84.6684	4.00108	2.00039	3.89687e-09	1.60832e-07	1.82942	1.63895	0.858746	1.42238	0.38767	2.05951	1.05331	0.361147	0.0122523	0	2.86088	4.02768	2.87554
chr1	90648539	90649539	DHS_11234:::chr1:::90649039	1.8583	12.7759	6.87507	2.78138	0.0146568	0.0720075	2.18951	1.01538	0.586504	0.846177	0.530579	1.1004	0.693057	0.0309555	0	0.0142341	2.81854	2.2596	1.49632
chr1	90656940	90657940	p300_2305:::chr1:::90657440	165.744	274.216	1.65446	0.726356	9.60301e-06	0.000156535	2.57282	4.14382	1.89729	2.01158	0.524318	3.31019	0.557734	2.80663	0.0367568	0.0284681	8.58795	5.63308	5.59541
chr1	90670434	90671434	p300_2307:::chr1:::90670934	4.29897	36.9924	8.60494	3.10517	2.58537e-07	6.62431e-06	2.66038	1.06411	0.714606	0.935036	0.642697	1.39122	0.724695	0.0722294	0.00612614	0	4.08507	2.57646	1.50141
chr1	90696722	90697722	p300_2311:::chr1:::90697222	81.8183	165.603	2.02403	1.01723	1.63604e-06	3.35151e-05	4.6291	3.33735	1.08945	3.90837	0.279689	2.36086	0.254935	1.38268	0.0122523	0.0142341	18.5153	9.09809	4.75008
chr1	90703232	90704232	p300_2313:::chr1:::90703732	27.4854	119.968	4.36479	2.12591	2.53036e-13	2.57029e-11	3.13209	1.3507	0.655622	1.66789	0.254341	0.706067	0.804906	0.464332	0.00612614	0.0569363	12.9266	6.75101	2.0856
chr1	90706043	90707043	p300_2314:::chr1:::90706543	25.7649	80.4494	3.12244	1.64268	1.76873e-05	0.000265677	5.14912	2.01502	0.567481	2.54717	0.53718	1.0379	0.644174	0.443695	0.0122523	0.0142341	12.4909	8.34773	4.92651
chr1	90709504	90710504	p300_2315:::chr1:::90710004	10.9275	19.4447	1.77943	0.831415	0.179539	0.449062	4.13458	2.01838	0.677723	1.60027	0.655013	0.774896	0.673407	0.185733	0.00612614	0.0427022	4.84279	4.496	2.35837
chr1	90733240	90734240	DHS_11257:::chr1:::90733740	3.02306	22.3112	7.38034	2.88369	0.000177221	0.00190714	2.34068	0.751849	0.558365	1.04691	0.747521	1.03643	1.27701	0.0515925	0	0	1.80875	1.27768	0.706332
chr1	90735690	90736690	p300_2317:::chr1:::90736190	21.3837	55.4503	2.59311	1.37468	0.000264967	0.00267836	4.59026	2.72683	0.827749	1.95886	0.645745	2.04277	0.522946	0.361147	0.0183784	0	13.5268	8.02314	3.48079
chr1	90818026	90819026	DHS_11265:::chr1:::90818526	4.88136	4.89945	1.00371	0.00533941	1	1	2.45753	0.723988	0.601874	1.09771	0.718783	0.822086	1.17389	0.0825479	0	0	1.94969	1.57398	1.52274
chr1	90820458	90821458	p300_2320:::chr1:::90820958	15.8088	33.1052	2.0941	1.06633	0.0243473	0.106531	3.42536	1.9396	0.879826	1.42295	0.564973	1.09639	0.591478	0.268281	0	0	15.6015	13.5443	3.83681
chr1	90846175	90847175	DHS_11269:::chr1:::90846675	1.80272	1.98188	1.09938	0.136695	1	1	1.97726	0.733559	0.277435	1.18653	0.667638	0.370993	1.25614	0.0309555	0	0	1.41406	3.21542	2.19582
chr1	90848517	90849517	DHS_11270:::chr1:::90849017	0.582381	0.416796	0.715676	-0.482621	1	1	3.33558	0.432476	0.314199	0.67837	0.501899	0.696921	1.04567	0.0103185	0.00612614	0	0.913416	1.19827	0.857269
chr1	90853822	90854822	p300_2322:::chr1:::90854322	3.71659	10.1136	2.7212	1.44424	0.13125	0.363232	2.36589	1.16759	0.607794	1.20175	0.392978	0.532161	1.85577	0.061911	0	0	3.33194	3.67564	1.22113
chr1	90860580	90861580	DHS_11275:::chr1:::90861080	3.71659	30.3153	8.15674	3.02799	4.65054e-06	8.34668e-05	2.54218	1.2985	0.514937	0.885695	0.592882	1.03288	0.896719	0.061911	0.00612614	0	1.31229	2.86924	1.61978
chr1	90892184	90893184	p300_2323:::chr1:::90892684	6.10169	13.7627	2.25555	1.17348	0.132343	0.365434	2.80777	1.47632	0.7694	2.06553	1.02054	1.11153	0.56106	0.103185	0.0367568	0.0711703	4.04411	2.5937	1.71757
chr1	90921514	90922514	p300_2325:::chr1:::90922014	119.204	128.721	1.07984	0.110811	0.615407	0.929525	3.33999	3.48077	1.52268	2.00994	0.496968	2.88343	0.413159	2.02242	0.104144	0.0142341	12.1769	9.72351	3.87345
chr1	90924499	90925499	DHS_11291:::chr1:::90924999	27.1519	102.701	3.78246	1.91932	3.89338e-10	2.07051e-08	2.05965	0.747143	0.462392	0.892045	0.470032	0.772901	1.55919	0.464332	0.0551353	0.0427022	1.02127	1.95811	1.45449
chr1	90925800	90926800	p300_2326:::chr1:::90926300	28.4834	106.223	3.72927	1.89889	2.38898e-10	1.33364e-08	2.34451	0.962613	0.475326	0.884737	0.546684	0.938897	1.48993	0.484969	0.0551353	0.0569363	5.25887	1.77134	1.90997
chr1	90930349	90931349	DHS_11294:::chr1:::90930849	12.259	32.7395	2.67066	1.41719	0.00445644	0.0280629	2.77903	0.880281	0.47016	0.938774	0.551777	0.846831	0.3197	0.20637	0	0	1.33892	0.988016	1.39942
chr1	90965096	90966096	p300_2327:::chr1:::90965596	162.61	155.54	0.956526	-0.0641244	0.741793	1	3.61688	7.45475	3.35751	3.63466	0.423844	4.74731	0.304781	2.75504	0.0551353	0.128107	4.53917	2.45195	1.95352
chr1	91079611	91080611	p300_2343:::chr1:::91080111	175.92	216.452	1.2304	0.299127	0.248365	0.555687	2.69034	2.69381	1.10953	1.94649	0.323309	2.22391	0.612345	3.00268	0.0245046	0.142341	7.52865	6.02635	1.79097
chr1	91085486	91086486	p300_2344:::chr1:::91085986	150.462	375.224	2.49382	1.31836	3.65703e-17	7.04626e-15	2.8411	2.19082	1.66164	1.84099	0.335737	3.05523	0.500354	2.54867	0.0367568	0.185043	10.8042	5.0923	3.55482
chr1	91178867	91179867	p300_2346:::chr1:::91179367	0.637958	0.833592	1.30666	0.385881	1	1	2.03128	0.606407	0.288015	0.776555	0.920148	0.467671	0.984871	0.0103185	0	0	4.11037	2.43934	1.4028
chr1	91796385	91797385	p300_2376:::chr1:::91796885	64.9269	141.795	2.18391	1.12692	1.34517e-05	0.000209789	1.72877	1.49974	1.0108	1.06301	0.744218	0.981871	0.690806	1.10408	0.0183784	0.0569363	5.34638	3.83415	2.55449
chr1	91804978	91805978	DHS_11500:::chr1:::91805478	4.29897	5.2652	1.22476	0.292496	0.892226	1	2.69489	1.14518	0.642287	1.04193	0.550898	1.02389	0.586242	0.0722294	0.0245046	0.0142341	1.57287	1.19459	1.08772
chr1	91806806	91807806	DHS_11502:::chr1:::91807306	2.3851	4.09139	1.71539	0.77854	0.703516	0.979922	2.15628	0.73308	0.680533	1.01614	0.975265	0.600616	0.65417	0.041274	0	0.0284681	0.712223	1.06781	0.789979
chr1	91809595	91810595	DHS_11503:::chr1:::91810095	14.6441	31.8293	2.17353	1.12004	0.0206353	0.094032	2.56997	2.44974	0.918846	1.31559	0.891139	1.25503	0.464027	0.247644	0.0122523	0.0284681	1.37376	0.90109	2.46143
chr1	91814411	91815411	DHS_11506:::chr1:::91814911	14.4218	15.7701	1.09349	0.128943	0.922844	1	2.13432	3.2578	2.09086	0.945069	1.52512	1.25532	1.20285	0.247644	0.0183784	0.0142341	1.39555	1.73923	1.37526
chr1	91819146	91820146	p300_2378:::chr1:::91819646	57.3003	37.4858	0.654198	-0.6122	0.0638565	0.21839	2.89594	8.13192	5.55523	1.05066	3.6086	3.90182	0.577787	0.969938	0.0245046	0.0711703	6.65585	4.10457	2.95591
chr1	91832215	91833215	p300_2381:::chr1:::91832715	136.927	63.0548	0.4605	-1.11873	1.09513e-06	2.36546e-05	3.34364	5.32105	2.66703	1.32538	5.75182	1.95363	0.83076	2.32166	0.0551353	0.170809	11.1621	6.9071	3.43808
chr1	91839482	91840482	p300_2383:::chr1:::91839982	10.9275	6.88134	0.629728	-0.667199	0.415786	0.754197	3.01436	1.4499	0.795348	0.969832	3.77422	0.664236	0.319623	0.185733	0.0122523	0.0284681	4.87844	2.89992	2.54943
chr1	92086385	92087385	p300_2396:::chr1:::92086885	1.8583	9.25449	4.98009	2.31617	0.0437449	0.165675	1.99464	1.29593	0.76557	0.820237	1.22708	1.12994	1.2443	0.0309555	0.00612614	0	4.42851	2.23445	1.91248
chr1	92118136	92119136	p300_2401:::chr1:::92118636	13.0637	14.1539	1.08346	0.115646	0.893359	1	2.04573	2.87843	1.52393	1.12087	0.962296	0.83348	0.596197	0.216688	0.0490091	0.0142341	4.6817	2.9685	2.28351
chr1	92172388	92173388	p300_2405:::chr1:::92172888	38.9953	83.9964	2.15401	1.10703	0.000176709	0.00190255	1.90517	3.65081	1.73397	1.08819	1.17628	1.3581	0.977241	0.660383	0.0245046	0.0284681	3.94759	2.93716	4.18754
chr1	92179613	92180613	p300_2406:::chr1:::92180113	66.703	53.7237	0.805417	-0.312192	0.304016	0.62579	2.41112	2.43082	0.843582	0.97058	0.688204	1.44029	0.462744	1.12472	0.104144	0.0284681	3.62605	5.37732	2.40105
chr1	92293611	92294611	p300_2408:::chr1:::92294111	1.74714	0.416796	0.238559	-2.06758	0.635112	0.933728	1.56791	0.891478	0.68413	1.03821	0.715121	0.695611	0.814733	0.0309555	0.0122523	0	2.63959	2.27244	1.42869
chr1	92301143	92302143	p300_2409:::chr1:::92301643	22.9086	20.2017	0.88184	-0.181411	0.723198	0.995596	2.6568	1.82286	0.633208	2.59035	0.50325	1.14706	0.539933	0.392103	0.0245046	0.0142341	17.3835	7.06623	5.36172
chr1	92308687	92309687	p300_2410:::chr1:::92309187	14.9219	24.999	1.67532	0.744437	0.152577	0.402557	2.1294	1.81752	0.810751	1.52386	0.510035	1.03602	2.14449	0.247644	0	0	5.56934	4.08286	3.61977
chr1	92311760	92312760	DHS_11626:::chr1:::92312260	7.95999	13.7371	1.72577	0.787244	0.288105	0.605513	1.5477	1.02079	0.631743	1.27199	0.446005	0.705241	1.01074	0.13414	0.00612614	0	1.18065	2.32326	1.18992
chr1	92320182	92321182	p300_2411:::chr1:::92320682	97.8204	64.9346	0.663814	-0.591149	0.0183631	0.0860029	2.63151	4.57745	2.08926	2.58033	0.444443	1.19058	0.548823	1.66128	0.104144	0.0142341	9.06648	5.90356	2.25293
chr1	92328079	92329079	p300_2412:::chr1:::92328579	36.6657	39.6464	1.08129	0.112755	0.789257	1	1.61268	1.81849	0.806911	1.44416	0.702626	0.892422	0.857892	0.61911	0.0612614	0.0284681	3.65097	4.9978	2.46495
chr1	92356808	92357808	p300_2413:::chr1:::92357308	4.93693	10.8196	2.19156	1.13196	0.194267	0.474637	2.82433	1.62684	1.36036	0.884266	1.12597	0.96901	0.75485	0.0825479	0.0183784	0	1.72361	2.03502	1.18383
chr1	92366677	92367677	DHS_11633:::chr1:::92367177	3.13421	31.8038	10.1473	3.34302	6.73662e-07	1.54346e-05	1.92645	0.862863	0.668978	0.819201	1.12888	0.906342	0.803215	0.0515925	0.00612614	0	2.50046	1.81277	1.45409
chr1	92368094	92369094	DHS_11634:::chr1:::92368594	4.29897	43.1933	10.0474	3.32874	7.59375e-09	2.92321e-07	2.37889	1.17675	0.838611	0.902793	1.10793	1.08979	0.906967	0.0722294	0.00612614	0	2.14466	2.16423	3.00517
chr1	92371376	92372376	p300_2414:::chr1:::92371876	1.27592	5.23968	4.1066	2.03794	0.194668	0.47522	2.26142	0.961476	0.64081	0.912824	0.940065	1.00992	0.844909	0.020637	0.00612614	0	3.93494	3.70323	2.19686
chr1	92383135	92384135	DHS_11637:::chr1:::92383635	0.637958	3.98929	6.25321	2.6446	0.20866	0.493532	1.74434	0.410887	0.610295	0.819201	0.725358	0.641222	1.3639	0.0103185	0.00612614	0	1.04551	1.62094	0.681197
chr1	92385248	92386248	DHS_11638:::chr1:::92385748	5.63047	31.7444	5.63796	2.49517	0.00198195	0.0144307	2.33973	0.944329	0.641444	0.776277	0.497681	0.898598	1.02021	0.0928664	0.00612614	0	2.6373	2.93556	1.19327
chr1	92389545	92390545	p300_2415:::chr1:::92390045	16.2245	16.6037	1.02337	0.03333	1	1	1.63836	1.99907	1.1235	1.03616	1.30022	0.948561	0.978239	0.278599	0	0	4.94922	5.21382	1.92582
chr1	92399935	92400935	p300_2419:::chr1:::92400435	12.3701	24.6843	1.99548	0.996737	0.0635431	0.217591	1.61526	0.933213	0.628657	0.815426	0.696301	0.821615	0.512665	0.20637	0	0	2.34976	2.48107	1.16378
chr1	92401467	92402467	p300_2420:::chr1:::92401967	10.2339	30.681	2.99797	1.58399	0.00314306	0.0211237	1.85166	0.969555	0.692352	0.964749	0.880817	0.945667	0.614893	0.175414	0	0	2.32905	2.63102	1.77741
chr1	92415514	92416514	p300_2421:::chr1:::92416014	107.861	149.807	1.38889	0.473933	0.0211439	0.0957254	3.11745	3.07217	1.18832	3.44841	0.447435	2.30979	0.315576	1.82637	0.0367568	0.0427022	17.1002	6.70077	4.3107
chr1	92420969	92421969	p300_2422:::chr1:::92421469	363.132	379.392	1.04478	0.0631947	0.642294	0.934417	2.62011	2.22184	1.23924	1.98788	0.406759	1.65876	0.390221	6.16014	0.128649	0.113873	7.36038	8.32394	2.19798
chr1	92424289	92425289	p300_2423:::chr1:::92424789	25.4048	53.5366	2.10734	1.07543	0.00412428	0.0263191	3.85881	2.3232	0.484646	1.79674	0.420264	1.50216	0.548581	0.433377	0.0183784	0.0142341	12.0463	8.67388	2.38018
chr1	92428300	92429300	DHS_11648:::chr1:::92428800	18.5274	32.3993	1.74872	0.806302	0.0742568	0.244214	3.75776	1.50122	0.420714	1.23702	0.696048	1.16034	0.604427	0.309555	0.00612614	0	2.75191	2.06292	1.99576
chr1	92440168	92441168	p300_2426:::chr1:::92440668	88.5845	152.691	1.72367	0.785486	0.000552057	0.00495763	4.52592	4.24315	2.25086	1.37901	0.66386	1.65098	0.554672	1.5065	0.085766	0.0569363	6.11141	3.64423	2.89158
chr1	92518091	92519091	p300_2431:::chr1:::92518591	111.495	572.171	5.13179	2.35946	9.6177e-55	2.13435e-51	2.06083	0.685962	0.353773	1.03718	0.39289	0.545161	3.8689	1.87797	0.042883	0.0996385	2.64462	4.0476	1.47419
chr1	92753910	92754910	DHS_11688:::chr1:::92754410	1.22034	17.3862	14.247	3.83259	0.000150361	0.00165951	1.50118	1.02589	0.442956	0.758799	0.616601	0.488673	1.48875	0.020637	0.0183784	0	2.56626	1.08599	0.642742
chr1	92792925	92793925	p300_2435:::chr1:::92793425	29.9817	205.07	6.83986	2.77397	6.4435e-29	3.90818e-26	1.94314	1.49023	0.700929	1.00924	0.547202	1.24033	1.34267	0.505606	0.0122523	0	3.30933	2.08024	2.22355
chr1	92797441	92798441	p300_2436:::chr1:::92797941	21.9105	167.347	7.63772	2.93314	1.1695e-25	5.65652e-23	2.538	1.50655	0.694708	1.43031	0.713392	0.864369	1.19704	0.371466	0.0306307	0	3.68995	1.70321	2.24463
chr1	93430572	93431572	p300_2474:::chr1:::93431072	153.069	123.141	0.804479	-0.313873	0.115933	0.333554	1.80573	3.16504	1.89315	1.17717	0.238472	2.78472	0.327039	2.58994	0.0735137	0.185043	3.8494	2.30214	2.40047
chr1	93434426	93435426	p300_2476:::chr1:::93434926	233.167	231.779	0.994049	-0.00861113	0.956583	1	4.52268	5.73111	2.41016	6.04422	0.380317	4.82213	0.303619	3.95198	0.0918921	0.128107	9.48772	2.38873	1.54541
chr1	93496945	93497945	p300_2480:::chr1:::93497445	13.3126	27.4488	2.06187	1.04395	0.0467138	0.173742	1.7581	2.36337	1.05179	0.621871	0.952565	1.36409	0.549479	0.227007	0.0122523	0	2.94847	2.49807	5.24621
chr1	93503490	93504490	DHS_11839:::chr1:::93503990	12.3145	39.2551	3.1877	1.67252	0.000381097	0.00363854	1.54825	1.35207	0.965506	0.888687	1.14971	0.977544	0.862073	0.20637	0	0	1.83721	1.80762	2.62561
chr1	93507231	93508231	DHS_11840:::chr1:::93507731	3.07864	55.2122	17.934	4.16462	3.70498e-13	3.65711e-11	1.91461	3.76695	1.54978	0.843284	1.57332	1.39868	0.878842	0.0515925	0	0	1.93089	1.9485	2.4395
chr1	93662014	93663014	p300_2485:::chr1:::93662514	4.29897	4.40608	1.02491	0.0355042	1	1	1.73653	0.902787	0.650446	1.54791	0.764992	0.604553	0.731897	0.0722294	0.0122523	0	5.70396	6.01076	2.34558
chr1	93665485	93666485	DHS_11865:::chr1:::93665985	0.582381	4.35503	7.47798	2.90265	0.253447	0.563287	1.78209	0.692856	0.344567	0.669544	0.975011	0.627515	0.808047	0.0103185	0.00612614	0	1.11618	0.675818	1.07687
chr1	93667015	93668015	p300_2486:::chr1:::93667515	6.6285	35.3508	5.33315	2.41499	1.63468e-05	0.000248249	2.58637	2.13529	1.21813	0.804101	1.24837	1.27986	0.647952	0.113503	0.00612614	0	5.21531	4.99556	3.26315
chr1	93674115	93675115	DHS_11869:::chr1:::93674615	3.13421	9.30554	2.96902	1.56999	0.122265	0.346999	2.67033	1.57992	0.7694	0.81146	2.27152	0.884175	1.13049	0.0515925	0.0122523	0	1.43791	1.65054	1.55655
chr1	93808344	93809344	p300_2490:::chr1:::93808844	4.88136	2.89205	0.592468	-0.75519	0.596819	0.912321	2.06729	1.4279	0.677723	0.876583	0.682305	1.19376	0.388771	0.0825479	0.00612614	0.0142341	4.69378	3.42087	1.37942
chr1	93810099	93811099	p300_2491:::chr1:::93810599	5.63047	12.2231	2.17089	1.11829	0.216511	0.506438	2.36646	1.37718	0.873617	0.98062	0.447341	1.6119	0.326529	0.0928664	0.00612614	0.0142341	2.94678	2.40304	2.04535
chr1	93812212	93813212	DHS_11905:::chr1:::93812712	26.903	36.176	1.34468	0.427263	0.3106	0.635804	2.26206	2.1388	0.910421	1.27778	0.548125	1.24149	0.539718	0.454014	0.0183784	0.0142341	1.66526	1.89963	2.11886
chr1	93816422	93817422	p300_2492:::chr1:::93816922	44.3478	51.7418	1.16673	0.222467	0.529255	0.855045	2.65904	3.46769	0.77703	1.37176	0.468625	1.41899	0.322174	0.75325	0.0183784	0.0142341	5.53207	5.89654	2.39541
chr1	94079675	94080675	p300_2505:::chr1:::94080175	233.86	165.935	0.709545	-0.495033	0.00299372	0.0202816	3.00744	2.21243	1.13316	5.63146	0.424241	1.09756	0.413159	3.9623	0.0673875	0.227745	6.41934	5.46948	4.30823
chr1	94213427	94214427	p300_2511:::chr1:::94213927	50.8942	43.9503	0.863563	-0.211626	0.565067	0.883429	1.7301	2.77493	0.995099	2.17491	1.1061	0.927481	0.816131	0.856435	0.0122523	0	3.65943	3.30536	3.72624
chr1	94220852	94221852	p300_2512:::chr1:::94221352	2.44068	2.841	1.16402	0.219116	1	1	2.20406	1.96057	0.816796	0.708226	0.826608	0.951468	0.92764	0.041274	0	0	2.92023	1.48013	1.46663
chr1	94244597	94245597	p300_2514:::chr1:::94245097	224.958	279.838	1.24396	0.314935	0.0385708	0.150613	3.05356	5.4787	3.43819	5.12046	0.361563	2.83001	0.601491	3.80752	0.165406	0.227745	9.41621	5.36062	6.22509
chr1	94251062	94252062	p300_2515:::chr1:::94251562	10.2895	17.9051	1.74013	0.799196	0.22371	0.517464	2.1302	1.10556	0.470392	0.962146	0.458647	0.876133	0.752127	0.175414	0	0.0142341	4.79509	4.61302	1.90924
chr1	94328433	94329433	p300_2522:::chr1:::94328933	331.043	425.673	1.28585	0.362727	0.00598437	0.0355046	4.04611	6.95204	2.05506	5.2327	0.324419	4.59938	0.46082	5.61326	0.122523	0.0569363	22.5176	11.319	7.69838
chr1	94596861	94597861	DHS_12030:::chr1:::94597361	0.637958	0.416796	0.653329	-0.614119	1	1	1.64467	0.640984	0.366177	0.842607	0.893061	0.913741	0.462308	0.0103185	0	0	0.769879	0.561095	0.510898
chr1	94603730	94604730	DHS_12032:::chr1:::94604230	1.8583	7.29813	3.92732	1.97355	0.120723	0.343902	2.86402	1.60413	0.807198	1.23829	0.965472	1.25753	1.33781	0.0309555	0	0	3.43324	3.54855	3.23108
chr1	95072837	95073837	p300_2547:::chr1:::95073337	176.227	148.506	0.842699	-0.24691	0.461907	0.80048	1.91542	9.34854	7.26303	1.14976	2.17421	3.72207	0.428172	2.99236	0.042883	0.0427022	3.80909	2.93473	3.14162
chr1	95087320	95088320	p300_2548:::chr1:::95087820	34.3362	27.3467	0.796438	-0.328366	0.462252	0.80089	2.78865	5.91677	4.28211	1.09021	1.4472	2.92346	0.950207	0.577836	0.0796398	0.0142341	4.11953	3.10079	2.46038
chr1	95107631	95108631	p300_2550:::chr1:::95108131	1.80272	8.08067	4.48249	2.1643	0.0817918	0.261216	2.89269	2.08806	0.944597	0.935857	0.880188	1.32329	0.609997	0.0309555	0.0122523	0.0284681	2.86866	2.21936	1.97688
chr1	95110879	95111879	DHS_12158:::chr1:::95111379	11.3431	18.4069	1.62273	0.698427	0.386033	0.720648	2.35583	2.19641	1.24653	1.12914	0.930583	1.6839	0.781463	0.196051	0.0245046	0.0427022	2.92865	2.27025	2.98146
chr1	95113637	95114637	DHS_12160:::chr1:::95114137	6.10169	24.0378	3.93953	1.97802	0.0019192	0.0140569	2.06833	2.70899	1.09574	0.946096	0.553381	1.5476	0.76951	0.103185	0.0122523	0.0284681	2.68562	1.49734	2.28567
chr1	95124273	95125273	p300_2552:::chr1:::95124773	95.8244	227.228	2.3713	1.24568	6.33976e-11	4.02516e-09	2.55901	5.7461	2.37663	2.40359	0.586536	4.38374	0.570221	1.62	0.0367568	0.0284681	2.30306	2.67599	2.16149
chr1	95545036	95546036	p300_2573:::chr1:::95545536	28.4834	80.7557	2.83518	1.50344	3.22653e-06	6.05957e-05	2.36922	3.00348	1.90275	0.905545	0.580375	1.66268	0.492102	0.484969	0.104144	0	3.09829	2.49414	6.81301
chr1	95564956	95565956	p300_2574:::chr1:::95565456	275.074	338.708	1.23133	0.300221	0.0363934	0.144194	2.49904	7.6469	5.5466	2.24946	0.453245	4.06546	0.317695	4.66396	0.15928	0.0142341	4.06936	3.5349	6.40447
chr1	95568957	95569957	DHS_12272:::chr1:::95569457	10.4007	20.3548	1.95707	0.968695	0.112187	0.325939	1.81797	1.70331	0.936249	1.47882	0.940065	1.02741	0.949254	0.175414	0.00612614	0	1.32201	1.53026	1.57914
chr1	95977397	95978397	p300_2594:::chr1:::95977897	26.514	43.0573	1.62395	0.699504	0.151839	0.401141	2.26561	6.17242	3.86203	1.12849	1.35614	2.28558	0.839988	0.454014	0.042883	0	2.53353	2.55069	4.60981
chr1	96791712	96792712	DHS_12395:::chr1:::96792212	1.27592	3.18122	2.49328	1.31805	0.528365	0.854897	5.52849	1.02782	0.545227	1.06875	0.331787	0.190952	1.39255	0.020637	0	0	3.906	2.67345	2.23142
chr1	96889462	96890462	p300_2598:::chr1:::96889962	3.77217	5.73305	1.51983	0.603907	0.697838	0.975687	4.87952	1.09893	0.495505	1.71403	0.345873	0.306244	0.284243	0.061911	0.00612614	0	3.70414	2.28673	4.03417
chr1	97639468	97640468	DHS_12454:::chr1:::97639968	2.3851	8.93979	3.74818	1.90619	0.0937995	0.287933	4.02072	0.622922	0.363485	1.25039	0.497681	0.555497	0.586943	0.041274	0	0.0142341	2.22318	3.40258	2.06545
chr1	97650900	97651900	p300_2610:::chr1:::97651400	7.95999	66.0745	8.30082	3.05325	8.63955e-12	6.56867e-10	3.37782	1.88824	0.832306	2.15381	0.420151	0.768485	1.04532	0.13414	0.00612614	0.0569363	6.12761	3.83377	2.42103
chr1	98379018	98380018	p300_2611:::chr1:::98379518	3.02306	11.1853	3.7	1.88753	0.0513186	0.186371	2.45337	0.73551	0.64865	2.4964	0.428482	0.322825	2.58017	0.0515925	0	0	5.35938	7.03074	3.04845
chr1	98642957	98643957	p300_2614:::chr1:::98643457	0	5.99669	Inf	Inf	0.0191628	0.0887106	3.31519	0.425698	0.287407	1.04713	0.532885	0.226478	0.763254	0	0	0	3.35703	2.81853	2.80697
chr1	98770903	98771903	p300_2616:::chr1:::98771403	59.3254	101.74	1.71495	0.778165	0.00233539	0.0165626	9.35786	2.29692	0.783284	3.91634	0.417071	1.61547	0.333428	1.00089	0.0612614	0.156575	8.45783	13.3715	6.34665
chr1	99519075	99520075	DHS_12532:::chr1:::99519575	4.29897	9.30554	2.16459	1.1141	0.252844	0.562446	4.59934	1.30007	0.708038	0.954516	0.697704	0.473402	0.481986	0.0722294	0.0490091	0.0142341	2.16528	4.26082	1.86797
chr1	99530394	99531394	p300_2620:::chr1:::99530894	25.4604	17.3862	0.682873	-0.550311	0.263408	0.575087	2.10621	1.77986	1.10152	0.796813	0.760226	0.903286	0.552067	0.433377	0.0735137	0.0854044	4.01676	5.00595	2.93877
chr1	101292155	101293155	DHS_12639:::chr1:::101292655	0	0.808067	Inf	Inf	0.844589	1	2.88751	0.295839	0.205975	0.807498	0.540537	0.252481	0.7652	0	0	0	1.53976	0.841643	1.07289
chr1	101606778	101607778	DHS_12653:::chr1:::101607278	0	0	NA	NA	NA	NA	2.58041	0.397113	0.280875	0.736084	0.656977	0.110665	0.660311	0	0	0	2.75582	2.75447	0.86214
chr1	102401327	102402327	DHS_12669:::chr1:::102401827	0	1.19934	Inf	Inf	0.639786	0.933728	2.16627	0.537888	0.436916	0.686214	0.868848	0.393477	1.80431	0	0	0	0.69989	1.22421	0.836015
chr1	102406199	102407199	DHS_12670:::chr1:::102406699	0.637958	10.9982	17.2398	4.10767	0.00265798	0.0184188	3.14982	0.763151	0.393582	1.12705	0.449075	0.330821	1.53527	0.0103185	0	0	3.53066	2.50885	3.25087
chr1	102684048	102685048	DHS_12684:::chr1:::102684548	0.637958	2.03293	3.18662	1.67203	0.6394	0.933728	3.83133	0.739597	0.419578	1.36534	0.62671	0.601145	3.20162	0.0103185	0	0	2.56626	1.30922	3.83173
chr1	102774413	102775413	p300_2639:::chr1:::102774913	2.96748	14.2305	4.79549	2.26168	0.0129134	0.0653641	5.04614	0.92144	0.229806	1.7888	0.798278	0.295108	1.77862	0.0515925	0	0	13.0752	11.1431	4.73108
chr1	103524676	103525676	p300_2640:::chr1:::103525176	0.637958	0.391271	0.613318	-0.705292	1	1	4.56555	0.614129	0.441374	0.978026	0.553967	0.386451	0.627703	0.0103185	0	0	7.28636	3.96775	4.26965
chr1	103662205	103663205	DHS_12727:::chr1:::103662705	0	1.22486	Inf	Inf	0.6354	0.933728	3.39037	0.36402	0.160918	0.773487	0.602229	0.0338144	0.627703	0	0	0	1.20294	0.631232	1.00583
chr1	103669882	103670882	DHS_12728:::chr1:::103670382	0	2.39868	Inf	Inf	0.268691	0.578802	5.86665	0.622343	0.401902	1.02757	0.481496	0.475051	0.839854	0	0.0122523	0	2.2533	1.72434	2.24297
chr1	104170494	104171494	DHS_12771:::chr1:::104170994	0	2.00741	Inf	Inf	0.358611	0.690707	2.85745	0.481183	0.558365	0.685253	0.458706	0.58666	1.08903	0	0.00612614	0	1.53048	0.36505	0.830978
chr1	104247391	104248391	DHS_12781:::chr1:::104247891	0	1.22486	Inf	Inf	0.6354	0.933728	8.95512	0.890641	0.478674	1.04584	0.645467	0.457209	1.09122	0	0	0	1.13855	2.34712	3.01142
chr1	104990168	104991168	p300_2650:::chr1:::104990668	0.582381	4.04034	6.93762	2.79444	0.208859	0.493614	7.67013	0.692262	0.296604	0.733068	0.575319	0.415512	1.20519	0.0103185	0	0	7.20607	4.84786	1.4346
chr1	105367793	105368793	p300_2652:::chr1:::105368293	8.7091	27.2956	3.13415	1.64807	0.00320519	0.0214465	6.86168	2.2364	0.915443	4.8149	0.395424	0.858779	1.81052	0.144459	0.00612614	0	19.0637	7.69502	8.39332
chr1	106909434	106910434	p300_2661:::chr1:::106909934	49.7004	154.12	3.10097	1.63272	2.45696e-11	1.69331e-09	4.34667	1.82885	0.642396	3.30056	0.481667	1.06063	0.735132	0.846116	0.0245046	0.0854044	9.71877	7.94978	4.0973
chr1	106967346	106968346	p300_2663:::chr1:::106967846	11.0386	16.1613	1.46407	0.549987	0.40273	0.739636	4.3992	1.49342	0.712989	4.26705	0.536319	0.832355	1.39796	0.185733	0	0	9.47544	8.54592	4.12648
chr1	106988774	106989774	DHS_12898:::chr1:::106989274	3.13421	6.83029	2.17927	1.12384	0.330547	0.660269	1.84342	1.53514	0.820859	0.862817	1.14473	1.29368	0.5559	0.0515925	0	0	2.30111	2.45971	2.90137
chr1	106991383	106992383	DHS_12900:::chr1:::106991883	1.16476	3.33437	2.86271	1.51738	0.717588	0.992326	4.43075	1.36838	0.47367	1.15602	1.05634	0.882238	0.757368	0.020637	0	0	2.65568	4.75074	1.82642
chr1	107320495	107321495	p300_2670:::chr1:::107320995	6.324	6.09879	0.964388	-0.0523139	1	1	4.28605	1.51787	0.879055	0.661041	0.690298	0.434636	0.720377	0.103185	0.0122523	0.0569363	2.3193	2.28194	1.50063
chr1	107388240	107389240	p300_2672:::chr1:::107388740	5.63047	30.8936	5.48687	2.45598	0.000102419	0.00119699	5.98211	2.16064	0.772405	4.11535	0.420755	1.3613	0.399185	0.0928664	0.00612614	0.0284681	8.38175	3.78739	2.72548
chr1	107655078	107656078	p300_2677:::chr1:::107655578	61.2392	83.7582	1.36772	0.451774	0.086505	0.270893	2.83443	1.07635	0.473304	1.12945	0.516035	0.690678	0.72348	1.03185	0.0245046	0.0996385	2.55534	3.48118	1.76097
chr1	107799606	107800606	p300_2682:::chr1:::107800106	5.99054	17.7264	2.95907	1.56514	0.0299249	0.124375	1.67143	1.83733	0.701743	1.25594	1.03644	0.92163	0.658537	0.103185	0.00612614	0	2.84151	5.63928	1.95817
chr1	107804567	107805567	p300_2683:::chr1:::107805067	6.6285	12.07	1.82092	0.864667	0.295043	0.613243	2.8498	1.59226	0.666825	0.966118	0.66447	1.02757	0.37159	0.113503	0	0	3.8217	2.1798	2.0344
chr1	107968293	107969293	p300_2692:::chr1:::107968793	29.0658	35.8952	1.23496	0.304467	0.479893	0.813249	2.38721	3.50739	2.02014	1.04516	1.16062	1.57315	0.281432	0.495288	0.00612614	0.0427022	3.73095	3.72913	2.44052
chr1	107973537	107974537	DHS_13017:::chr1:::107974037	4.82578	2.81547	0.583424	-0.777384	0.595332	0.91106	2.01845	0.913619	0.605808	1.01608	0.669105	0.611047	1.04652	0.0825479	0.00612614	0	2.26435	1.30702	1.78514
chr1	108005546	108006546	p300_2693:::chr1:::108006046	2.3851	4.50818	1.89014	0.918496	0.60847	0.923043	1.59953	0.992176	0.582947	0.775039	0.718351	0.734985	0.552244	0.041274	0	0	3.31193	4.23045	2.75885
chr1	108346002	108347002	DHS_13064:::chr1:::108346502	6.26842	17.6499	2.81568	1.49348	0.0345136	0.138512	3.03703	0.755005	0.400506	1.09714	0.620181	0.751432	1.2853	0.103185	0.0122523	0	1.49699	1.54301	3.06539
chr1	108713025	108714025	p300_2714:::chr1:::108713525	4.82578	3.25779	0.675082	-0.566866	0.703412	0.979921	2.39643	1.81187	1.12133	0.731994	1.1161	0.877347	0.747843	0.0825479	0	0	4.28041	3.86051	1.59779
chr1	109857267	109858267	DHS_13159:::chr1:::109857767	3.71659	4.04034	1.08711	0.120495	1	1	2.85216	0.909566	0.575706	1.43269	0.578052	0.645204	3.00763	0.061911	0	0	3.15603	3.95206	2.22764
chr1	109874039	109875039	p300_2716:::chr1:::109874539	2.3851	7.66388	3.21323	1.68402	0.16442	0.42222	5.54549	2.56548	0.933323	2.05715	0.675671	0.541031	0.77342	0.041274	0	0	5.6538	6.15452	3.16118
chr1	110445029	110446029	p300_2721:::chr1:::110445529	8.59795	8.0041	0.930931	-0.103254	1	1	3.69576	0.890641	0.522189	3.56031	0.496513	0.853457	2.93012	0.144459	0.00612614	0	9.10843	6.40123	4.33903
chr1	111838440	111839440	DHS_13237:::chr1:::111838940	0	2.39868	Inf	Inf	0.268691	0.578802	3.98005	0.609386	0.348126	0.445039	0.585885	0.274325	0.575921	0	0.00612614	0	1.62651	2.77387	1.94285
chr1	112686838	112687838	p300_2730:::chr1:::112687338	9.76271	13.7371	1.4071	0.492729	0.506367	0.8408	6.64446	1.29513	0.587168	2.90242	0.427495	0.235018	1.17831	0.165096	0	0	5.64346	9.59702	5.80482
chr1	113543071	113544071	DHS_13322:::chr1:::113543571	0.582381	2.841	4.87825	2.28636	0.416092	0.754197	3.82283	0.786662	0.2996	1.11071	0.77769	0.393477	0.926066	0.0103185	0	0	1.53976	0.734525	1.58843
chr1	115290647	115291647	p300_2743:::chr1:::115291147	0	2.86652	Inf	Inf	0.196217	0.476843	2.73745	0.696091	0.363485	0.929346	0.497681	0.33947	1.01276	0	0	0	4.37774	3.56461	2.1638
chr1	115470827	115471827	DHS_13406:::chr1:::115471327	0	0.808067	Inf	Inf	0.844589	1	2.92908	0.401677	0.142052	0.835343	0.680736	0.410437	0.717375	0	0	0	1.85833	1.0448	1.42699
chr1	115488441	115489441	DHS_13408:::chr1:::115488941	7.90441	20.6185	2.60848	1.38321	0.0306831	0.126864	2.53749	1.35029	0.494339	0.776402	0.515693	0.296794	1.52493	0.13414	0.00612614	0	1.45177	1.73138	1.89178
chr1	115866903	115867903	p300_2749:::chr1:::115867403	0.637958	3.23227	5.06659	2.34101	0.329139	0.659175	3.90309	0.809061	0.238976	1.78065	0.483017	0.394564	0.665851	0.0103185	0	0	4.72136	3.01318	5.411
chr1	116745993	116746993	p300_2750:::chr1:::116746493	42.0183	50.6956	1.20651	0.270843	0.445358	0.784077	4.91507	2.4205	0.722249	3.11874	0.439511	0.702637	1.0714	0.711976	0.00612614	0.113873	15.6975	11.5425	8.89758
chr1	118951011	118952011	DHS_13541:::chr1:::118951511	0	0.391271	Inf	Inf	1	1	3.00621	0.5665	0.438244	0.784341	0.570039	0.552542	2.8695	0	0	0	3.27608	3.86798	2.83711
chr1	119187036	119188036	p300_2753:::chr1:::119187536	19.4143	46.5022	2.39526	1.26018	0.00213564	0.0153858	8.39958	1.39025	0.4302	4.1797	0.499781	0.493091	2.00229	0.330192	0.0122523	0.0284681	5.40864	5.56124	6.72251
chr1	119189432	119190432	DHS_13553:::chr1:::119189932	10.9275	23.5361	2.15384	1.10691	0.0548943	0.195657	6.3502	0.953581	0.416578	2.98226	0.435704	0.620058	2.07958	0.185733	0	0.0284681	0.908284	2.89374	4.88223
chr1	119205958	119206958	DHS_13554:::chr1:::119206458	1.22034	0	0	#NAME?	0.536748	0.857798	2.90794	0.507689	0.209466	1.16037	0.629365	0.33012	0.571468	0.020637	0	0	1.56586	0.684727	2.18214
chr1	119364053	119365053	DHS_13569:::chr1:::119364553	1.8583	1.22486	0.659132	-0.60136	0.950735	1	3.10924	0.68917	0.18725	1.16497	0.66944	0.885323	0.999978	0.0309555	0	0	1.04984	1.37723	1.39336
chr1	120235675	120236675	DHS_13633:::chr1:::120236175	20.6902	39.4677	1.90756	0.931725	0.0271614	0.115735	2.42561	1.11416	0.663009	1.46462	0.562828	1.08671	0.443356	0.350829	0.00612614	0.0142341	2.37903	1.95059	1.00645
chr1	120238435	120239435	p300_2763:::chr1:::120238935	3.60544	18.0922	5.01802	2.32712	0.00331012	0.0220174	2.12366	0.758158	0.548736	0.829594	0.631549	1.25335	0.39054	0.061911	0	0.0284681	3.83453	3.1586	0.745635
chr1	120240338	120241338	p300_2764:::chr1:::120240838	21.4949	55.2888	2.57219	1.36299	0.000293994	0.00292045	2.96186	1.61241	0.805988	1.57989	0.525502	1.49204	0.467853	0.361147	0.0183784	0.0142341	10.7592	5.08122	2.1848
chr1	120521771	120522771	p300_2787:::chr1:::120522271	73.8027	38.7362	0.524861	-0.929992	0.00209846	0.015163	2.91174	1.67713	0.871225	1.72426	0.920429	1.93245	0.427054	1.24854	0.0122523	0.0284681	17.1866	8.22745	2.77325
chr1	120586127	120587127	p300_2799:::chr1:::120586627	87.1153	82.525	0.947308	-0.078095	0.76799	1	2.32096	2.66599	1.37316	3.63333	0.2587	1.79505	0.367029	1.47554	0.0612614	0.185043	24.9465	11.3524	4.74066
chr1	120626340	120627340	p300_2800:::chr1:::120626840	6.57292	3.98929	0.606928	-0.720404	0.527657	0.854786	2.09584	0.754956	0.552776	0.989323	0.666755	0.912665	0.893854	0.113503	0.0183784	0	3.61573	2.32326	1.76284
chr1	120653629	120654629	p300_2806:::chr1:::120654129	10.8163	9.74786	0.901218	-0.150052	0.870769	1	1.91607	1.4181	0.770166	1.41045	0.572213	1.03502	0.5739	0.185733	0	0	4.954	1.93212	1.15952
chr1	120672906	120673906	p300_2809:::chr1:::120673406	92.579	48.1438	0.52003	-0.943335	0.00046966	0.00433215	1.69129	2.24012	1.25622	1.00696	0.860004	1.40906	0.419783	1.56841	0.0245046	0.0284681	3.61674	4.82789	2.65274
chr1	120951428	120952428	p300_2822:::chr1:::120951928	129.523	75.2863	0.58126	-0.782745	0.000621234	0.00547563	3.10433	4.23817	1.89288	1.71988	1.19234	3.33659	0.604775	2.18752	0.116397	0.170809	4.5608	5.6763	2.96838
chr1	120961168	120962168	p300_2824:::chr1:::120961668	243.845	187.267	0.767976	-0.380867	0.0199607	0.0915307	2.48812	6.82232	3.25223	1.96939	1.07417	5.35935	0.470964	4.1274	0.0245046	0.0996385	3.90271	4.61621	3.32437
chr1	120971767	120972767	p300_2826:::chr1:::120972267	322.752	313.981	0.972824	-0.0397486	0.805651	1	2.41289	6.75084	3.42692	9.38964	0.203202	3.67145	0.258443	5.45848	0.140901	0.227745	21.7348	13.9588	6.68629
chr1	120978495	120979495	p300_2829:::chr1:::120978995	90.8029	149.765	1.64934	0.721885	0.000780967	0.00662356	3.06077	3.97382	1.26624	2.66768	0.366009	2.92689	0.358688	1.54777	0.0551353	0.128107	6.37359	7.11947	4.74884
chr1	120979893	120980893	p300_2831:::chr1:::120980393	35.3342	65.0961	1.84229	0.881504	0.00633476	0.0371339	2.15526	3.11539	1.54876	1.38998	0.42916	2.24161	0.247687	0.598473	0.0673875	0.0427022	3.36699	3.25464	3.49266
chr1	120982058	120983058	p300_2832:::chr1:::120982558	13.8394	42.6916	3.08479	1.62517	0.00688655	0.0397496	2.18616	1.9258	0.641761	0.918867	0.493743	1.09812	0.581138	0.237325	0.0306307	0.0711703	3.22116	3.68625	2.04662
chr1	121043757	121044757	p300_2838:::chr1:::121044257	35.9166	41.0754	1.14363	0.193623	0.663193	0.949084	2.31579	2.65878	1.03279	2.03192	0.455385	1.78402	0.506024	0.608791	0.0306307	0.0284681	8.11317	6.35166	2.61817
chr1	121063729	121064729	p300_2843:::chr1:::121064229	110.855	96.9681	0.874728	-0.193094	0.375906	0.710197	1.89831	2.71009	1.08872	2.30212	0.53718	1.12844	0.46117	1.88828	0.0490091	0	10.3384	9.37831	3.94121
chr1	121093751	121094751	p300_2845:::chr1:::121094251	14.5885	32.2461	2.21038	1.1443	0.018271	0.0856606	1.70918	2.89874	1.07971	0.849402	1.01967	1.37876	0.792584	0.247644	0.00612614	0	2.23513	2.44348	2.22488
chr1	121105777	121106777	p300_2846:::chr1:::121106277	1.16476	3.64907	3.13289	1.64749	0.439981	0.779815	1.5002	1.38924	0.964926	0.787572	0.872312	0.779864	1.10515	0.020637	0	0	2.0114	2.82064	2.11263
chr1	121196120	121197120	p300_2850:::chr1:::121196620	214.279	153.431	0.716031	-0.481906	0.00550645	0.0332214	3.49644	5.07675	2.00747	4.53917	0.515365	3.64166	0.518914	3.63211	0.0796398	0.0569363	10.0827	10.4586	7.10719
chr1	121197575	121198575	p300_2851:::chr1:::121198075	113.214	89.5679	0.79114	-0.337995	0.139161	0.378963	3.05679	4.27224	1.91616	2.81038	0.535566	2.49707	0.574245	1.91924	0.0796398	0.199277	7.82834	5.53542	13.6284
chr1	121201522	121202522	p300_2852:::chr1:::121202022	146.552	137.559	0.938634	-0.0913652	0.674345	0.955873	2.94454	5.26264	2.58765	6.75339	0.361398	2.7782	0.290562	2.47644	0.275676	0.227745	33.8254	21.8404	10.9533
chr1	121226286	121227286	p300_2853:::chr1:::121226786	5.68604	14.1795	2.49373	1.31831	0.0923865	0.284937	3.24295	1.62261	0.787382	1.12912	0.722626	1.25891	0.405387	0.0928664	0.0245046	0.0142341	6.71778	6.04304	3.24795
chr1	121230007	121231007	DHS_13935:::chr1:::121230507	21.6616	56.7179	2.61836	1.38866	0.000568663	0.00508016	4.52412	3.34731	1.1009	1.47093	0.782036	2.23875	0.562768	0.361147	0.0122523	0	2.92023	3.22146	2.81434
chr1	121231486	121232486	p300_2854:::chr1:::121231986	18.0272	38.7362	2.14876	1.10351	0.0131553	0.0662406	5.78168	2.59486	0.79597	0.996133	0.693098	1.18843	0.401244	0.309555	0.00612614	0.0142341	3.36659	3.59482	2.52505
chr1	121241695	121242695	p300_2855:::chr1:::121242195	15.3932	31.3615	2.03736	1.0267	0.0302007	0.125267	2.95342	2.17056	0.805988	1.22587	0.481036	1.78052	0.460656	0.257962	0.0183784	0	6.25688	7.90413	5.16707
chr1	121244722	121245722	p300_2857:::chr1:::121245222	161.638	175.172	1.08373	0.116004	0.546617	0.867664	3.29681	6.19782	2.80126	3.39851	0.513902	3.39046	0.473468	2.74472	0.0551353	0.0854044	10.573	7.2718	7.69412
chr1	121251555	121252555	p300_2859:::chr1:::121252055	7.32203	16.5016	2.25369	1.17229	0.0926908	0.285599	2.40363	1.52624	0.585017	1.26204	0.500626	1.34457	1.13337	0.123822	0.00612614	0.0142341	2.66497	3.13749	2.44868
chr1	121253173	121254173	p300_2860:::chr1:::121253673	2.3851	3.25779	1.36589	0.449845	0.923799	1	4.45681	0.947439	0.33828	1.19933	0.427146	0.710843	0.730466	0.041274	0.00612614	0	3.45603	5.30788	3.22201
chr1	121271724	121272724	p300_2861:::chr1:::121272224	4.13224	6.04774	1.46355	0.549472	0.722868	0.995288	2.0143	0.94504	0.584866	0.871214	0.725358	1.09542	1.92186	0.0722294	0	0	3.23159	2.49376	2.10036
chr1	121285161	121286161	p300_2862:::chr1:::121285661	202.298	125.863	0.622164	-0.684634	0.000203408	0.00213835	3.05976	4.47555	1.82809	1.52967	0.71022	1.92073	0.38412	3.42574	0.0796398	0	5.81645	6.07465	4.14839
chr1	121294835	121295835	p300_2863:::chr1:::121295335	103.146	81.283	0.788035	-0.343668	0.160373	0.416294	3.32726	3.38487	1.09753	5.84289	0.483756	2.89076	0.392724	1.74383	0.0183784	0.0427022	27.592	15.6288	6.07484
chr1	121301104	121302104	p300_2864:::chr1:::121301604	21.7994	18.4834	0.847889	-0.238052	0.670582	0.9528	2.27141	2.4174	0.758577	1.87485	0.577022	2.45747	0.577937	0.371466	0.00612614	0.0142341	5.25723	4.95945	3.5985
chr1	121303828	121304828	DHS_13960:::chr1:::121304328	17.6115	8.96532	0.509059	-0.974095	0.120577	0.343585	1.83496	0.959853	0.58112	1.64427	0.676316	1.52642	0.68814	0.299236	0.00612614	0	1.66526	3.6093	1.77293
chr1	121306960	121307960	DHS_13962:::chr1:::121307460	6.79523	12.4612	1.83382	0.874853	0.258731	0.570641	1.75011	0.913808	0.535772	1.06848	0.745803	0.938204	1.26266	0.113503	0	0	1.46856	4.20335	2.19273
chr1	121339170	121340170	p300_2868:::chr1:::121339670	62.3195	84.7705	1.36026	0.443879	0.106422	0.3145	2.28223	5.3251	3.10366	1.98922	0.807601	2.8773	0.596726	1.0628	0.0980183	0.0569363	4.67177	3.78739	3.29181
chr1	121347904	121348904	DHS_13984:::chr1:::121348404	6.79523	15.668	2.30573	1.20522	0.0894954	0.278166	2.10383	2.91593	1.1201	0.763692	1.19283	1.80453	0.559163	0.113503	0	0	2.37244	2.74615	2.33377
chr1	121350063	121351063	p300_2871:::chr1:::121350563	11.0942	12.0955	1.09025	0.124663	0.903294	1	2.49623	1.38969	0.591629	1.05886	0.753802	1.29502	0.47507	0.185733	0	0.0142341	8.90685	6.76896	3.44856
chr1	121359668	121360668	DHS_13987:::chr1:::121360168	3.07864	4.79735	1.55827	0.639948	0.681012	0.961332	1.86488	0.747636	0.716434	0.904429	0.75103	1.01149	0.304105	0.0515925	0.0122523	0	1.08787	2.63471	1.49937
chr1	121433987	121434987	p300_2879:::chr1:::121434487	107.001	118.19	1.10458	0.143492	0.528813	0.854897	1.88181	3.84994	1.20356	2.80702	0.522506	2.06646	0.480522	1.81605	0.251172	0.241979	4.00483	4.10226	6.32373
chr1	121436635	121437635	DHS_14017:::chr1:::121437135	39.2176	39.8761	1.01679	0.0240233	0.991424	1	1.65694	0.670604	0.461137	0.801734	0.463017	0.96901	0.393486	0.660383	0.110271	0.0427022	1.12035	1.24362	1.80149
chr1	121760552	121761552	DHS_14064:::chr1:::121761052	0	0.416796	Inf	Inf	1	1	1.57575	0.470152	0.298625	0.927964	0.822993	0.748191	0.648038	0	0	0	1.54548	3.26645	1.02559
chr1	121765178	121766178	p300_2888:::chr1:::121765678	7.43319	20.1762	2.71434	1.4406	0.0245851	0.107357	3.74338	3.28468	1.31258	1.41467	0.663575	1.65492	0.548581	0.123822	0.00612614	0	8.15166	3.36657	2.47936
chr1	121766483	121767483	DHS_14068:::chr1:::121766983	0	0.416796	Inf	Inf	1	1	2.615	0.70067	0.675464	0.857105	0.804954	0.709692	0.85388	0	0	0	1.77664	1.22669	1.28448
chr1	121784664	121785664	DHS_14075:::chr1:::121785164	3.07864	3.23227	1.0499	0.0702565	1	1	1.57235	0.783812	0.582102	0.641114	1.20573	0.9174	0.818743	0.0515925	0	0	1.08787	1.75647	1.29946
chr1	121973963	121974963	p300_2902:::chr1:::121974463	132.932	176.065	1.32447	0.405415	0.0336668	0.136285	3.91593	2.81373	1.01363	3.24949	0.413688	2.58056	0.359819	2.25975	0.085766	0.327384	4.59013	4.30114	2.30629
chr1	121979479	121980479	p300_2903:::chr1:::121979979	162.694	223.869	1.37601	0.46049	0.00648	0.037812	3.2612	5.78892	2.16931	3.40348	0.341273	4.26493	0.280463	2.74472	0.116397	0.298915	5.03697	3.3039	2.7882
chr1	121985534	121986534	p300_2905:::chr1:::121986034	221.408	247.294	1.11692	0.15952	0.313936	0.639959	3.92987	4.40732	1.59162	4.00238	0.371753	4.13151	0.352166	3.74561	0.26955	0.241979	7.06889	5.69257	3.55306
chr1	122250713	122251713	p300_2921:::chr1:::122251213	1.22034	2.841	2.32804	1.21912	0.63423	0.933728	1.86373	0.707384	0.4952	0.968851	1.01213	0.701266	1.03482	0.020637	0.00612614	0	5.23089	6.65103	2.78769
chr1	122253545	122254545	DHS_14207:::chr1:::122254045	9.23591	19.4191	2.10257	1.07215	0.0857263	0.26899	2.35368	2.17567	1.70311	1.03837	0.981587	1.14706	0.509514	0.154777	0	0	1.55064	1.4989	1.99846
chr1	122268784	122269784	p300_2922:::chr1:::122269284	3.07864	9.62023	3.12484	1.64378	0.10446	0.310305	1.9556	0.748554	0.577299	0.885612	0.824589	0.853668	1.12447	0.0515925	0	0	3.03689	1.99199	3.15024
chr1	122270358	122271358	p300_2923:::chr1:::122270858	3.07864	24.863	8.07599	3.01364	0.00242109	0.0170503	1.74005	1.07462	0.716714	0.950904	0.645373	0.63092	1.18738	0.0515925	0	0	4.34415	2.65949	1.77293
chr1	122297341	122298341	DHS_14221:::chr1:::122297841	0	2.44973	Inf	Inf	0.264353	0.575522	2.4125	0.755803	0.49237	1.14558	0.702239	0.620784	1.08035	0	0	0	1.84035	2.29356	1.64871
chr1	122426173	122427173	DHS_14238:::chr1:::122426673	2.9119	12.4357	4.27064	2.09445	0.0294243	0.122792	4.29298	1.07628	0.522622	1.72923	0.575263	0.775208	0.556769	0.0515925	0	0	2.06833	2.26113	2.95101
chr1	122435805	122436805	p300_2926:::chr1:::122436305	0.582381	1.59061	2.73122	1.44954	0.797431	1	2.83845	1.26031	0.681534	1.01066	0.559891	1.57535	0.656715	0.0103185	0	0.0284681	4.16074	2.56206	1.065
chr1	122484583	122485583	DHS_14247:::chr1:::122485083	1.22034	13.3714	10.9571	3.4538	0.00186018	0.0137125	1.67555	0.681057	0.572594	0.841794	1.4591	1.20322	0.664749	0.020637	0.0122523	0	1.0701	0.701911	0.852154
chr1	122486994	122487994	DHS_14249:::chr1:::122487494	0.637958	1.59061	2.49328	1.31805	0.792653	1	2.75244	1.51281	1.0348	0.755927	3.05633	1.27362	0.895861	0.0103185	0	0	1.87865	1.73966	1.18802
chr1	122540092	122541092	p300_2928:::chr1:::122540592	4.18782	15.7701	3.7657	1.91292	0.0183015	0.0857761	4.21436	3.36476	1.29017	0.995387	1.96277	1.26042	0.756791	0.0722294	0	0	5.75294	4.43944	1.76849
chr1	122655585	122656585	p300_2933:::chr1:::122656085	8.59795	13.6606	1.58882	0.667953	0.355479	0.689514	3.90725	1.32896	0.407658	1.56892	0.812764	0.879175	1.92047	0.144459	0	0	7.13742	11.5726	5.65181
chr1	122659278	122660278	p300_2935:::chr1:::122659778	1.27592	3.96376	3.1066	1.63534	0.414215	0.752823	1.54566	0.729602	0.50102	0.939393	0.813029	0.584898	3.11509	0.020637	0	0	3.46792	1.81977	3.27251
chr1	122808565	122809565	DHS_14298:::chr1:::122809065	0	0.416796	Inf	Inf	1	1	2.33055	0.681676	0.670038	0.862911	0.713543	0.599697	1.16682	0	0	0	1.4841	0.973467	1.10797
chr1	122874599	122875599	DHS_14301:::chr1:::122875099	2.9119	31.1489	10.6971	3.41915	1.10575e-06	2.38486e-05	3.57147	1.68689	0.536099	1.05326	1.04952	1.09688	0.786165	0.0515925	0	0	1.58194	0.968466	2.20456
chr1	123292596	123293596	DHS_14347:::chr1:::123293096	0.582381	10.1647	17.4536	4.12545	0.00461653	0.0288638	1.887	0.825054	0.467338	1.009	0.628026	0.763808	0.976595	0.0103185	0	0	0.873392	1.01846	1.04326
chr1	123294519	123295519	p300_2943:::chr1:::123295019	7.48876	25.1777	3.36207	1.74935	0.00522546	0.0318096	2.0923	0.608814	0.577734	0.976191	0.659192	1.02928	0.848602	0.123822	0	0	4.13106	1.35484	1.45793
chr1	123738654	123739654	p300_2955:::chr1:::123739154	7.43319	27.032	3.63666	1.86261	0.00147235	0.0112893	5.89661	1.92586	0.694297	3.01776	0.538689	0.91185	0.507805	0.123822	0.00612614	0	9.34235	2.21286	4.33976
chr1	124224548	124225548	p300_2957:::chr1:::124225048	1.74714	5.23968	2.999	1.58448	0.317961	0.644814	6.34087	1.18238	0.772405	0.997824	1.35444	1.11054	0.637142	0.0309555	0	0	3.49485	1.79403	4.08382
chr1	124351618	124352618	p300_2960:::chr1:::124352118	1.27592	4.01481	3.14661	1.6538	0.358934	0.691054	3.49933	0.769329	0.372618	0.762157	1.24003	0.652499	1.27613	0.020637	0	0	5.2228	3.80643	1.80226
chr1	124503632	124504632	p300_2962:::chr1:::124504132	11.5654	19.8615	1.71731	0.780153	0.198368	0.479102	4.95048	1.7193	0.527139	2.81535	0.407658	0.461543	0.968966	0.196051	0.0673875	0.0142341	9.85153	13.4982	5.3608
chr1	124563507	124564507	p300_2964:::chr1:::124564007	10.7607	10.8706	1.01021	0.014657	1	1	3.28586	1.0062	0.934071	2.02079	0.680454	1.0569	1.2137	0.185733	0	0	2.95419	0.704632	2.16538
chr1	124961450	124962450	p300_2965:::chr1:::124961950	0.637958	0	0	#NAME?	0.903999	1	7.19284	1.17682	0.238976	1.46642	1.03615	0.107608	0.713412	0.0103185	0	0	3.70052	3.51537	3.12466
chr1	126071054	126072054	p300_2967:::chr1:::126071554	0	0.833592	Inf	Inf	0.840158	1	5.57567	0.636875	0.305148	0.858211	1.04452	0.200382	0.464965	0	0	0	5.41767	2.61845	2.55449
chr1	127168968	127169968	DHS_14498:::chr1:::127169468	0.582381	0	0	#NAME?	0.903996	1	3.0526	0.780685	0.457722	0.682668	1.10545	0.841603	1.63402	0.0103185	0	0	0.570281	0.561095	1.44754
chr1	127422313	127423313	p300_2973:::chr1:::127422813	3.66102	31.0978	8.49432	3.0865	2.99206e-06	5.67801e-05	5.40209	1.58814	0.53844	2.51733	0.696272	0.78124	0.759048	0.061911	0.00612614	0	3.83342	2.51445	5.38033
chr1	127423634	127424634	DHS_14526:::chr1:::127424134	0	8.02962	Inf	Inf	0.00435981	0.0275362	4.88509	0.832046	0.361551	1.81519	0.952565	0.62161	0.973035	0	0	0	1.35138	0.644663	3.66868
chr1	127535198	127536198	p300_2978:::chr1:::127535698	1.22034	0.782542	0.64125	-0.641041	1	1	2.68412	0.938265	0.591629	1.02525	0.682547	0.794279	2.65581	0.020637	0	0	3.56274	1.28933	2.12784
chr1	127559067	127560067	DHS_14553:::chr1:::127559567	8.7091	17.0715	1.96019	0.970995	0.156826	0.410516	1.95755	1.21938	0.639232	1.51179	0.644268	0.839531	1.32653	0.144459	0	0	1.89151	1.4366	3.3891
chr1	128812666	128813666	DHS_14646:::chr1:::128813166	7.48876	6.04774	0.807576	-0.308331	0.856275	1	2.70397	1.168	0.606265	1.33545	0.739636	0.538989	1.20194	0.123822	0.0306307	0	1.65597	3.08708	2.39447
chr1	129063947	129064947	p300_3001:::chr1:::129064447	47.0664	2.05846	0.0437351	-4.51506	6.79997e-14	7.75989e-12	2.17569	1.53145	0.649268	1.64858	0.577322	1.17615	1.56731	0.794524	0.0673875	0	3.68203	2.85427	3.79841
chr1	130333490	130334490	p300_3057:::chr1:::130333990	3.60544	1.25039	0.346806	-1.5278	0.392328	0.726247	4.24814	0.959756	0.373629	1.16103	0.564039	0.785124	0.450445	0.061911	0	0	3.11532	1.83204	1.92478
chr1	130337353	130338353	DHS_14938:::chr1:::130337853	16.2801	39.5953	2.43214	1.28222	0.00435084	0.0274933	2.84569	2.6189	1.17507	1.04635	0.855305	1.87321	0.395144	0.278599	0.0245046	0	2.80186	2.08617	2.80408
chr1	130340727	130341727	p300_3058:::chr1:::130341227	5.46374	8.47194	1.55058	0.632805	0.541401	0.862674	2.6231	0.762404	0.462763	0.876942	0.987689	1.02963	0.786901	0.0928664	0.00612614	0.0142341	3.66286	1.33476	1.70149
chr1	130355681	130356681	p300_3059:::chr1:::130356181	0.582381	1.22486	2.1032	1.07259	0.972292	1	3.61461	0.944166	0.569717	0.9188	0.755052	0.943926	0.404477	0.0103185	0	0	2.04755	1.7191	1.8588
chr1	130368726	130369726	p300_3061:::chr1:::130369226	21.3281	16.1869	0.758944	-0.397934	0.471257	0.811315	2.66411	6.17058	4.50969	1.52101	1.73854	1.71382	0.447803	0.361147	0.0122523	0	4.94922	4.61074	2.95591
chr1	130431806	130432806	DHS_14955:::chr1:::130432306	0	2.841	Inf	Inf	0.197834	0.478357	1.80085	0.903188	0.781019	0.833993	0.702427	0.434434	1.19207	0	0	0	1.11618	0.788454	1.07687
chr1	130493219	130494219	p300_3065:::chr1:::130493719	12.7858	19.3936	1.51681	0.601043	0.318315	0.645407	3.47802	1.37901	0.615462	0.868624	1.35392	1.18984	0.565898	0.216688	0	0	4.69289	2.89713	2.96769
chr1	130496251	130497251	DHS_14969:::chr1:::130496751	0	1.19934	Inf	Inf	0.639786	0.933728	1.5267	0.46637	0.531336	0.784912	0.781391	0.599614	0.637413	0	0	0	1.10333	1.35092	0.702891
chr1	130498275	130499275	p300_3066:::chr1:::130498775	4.88136	18.9258	3.87716	1.955	0.00707394	0.040611	2.67506	0.922268	0.521141	0.812151	0.583293	0.912582	0.509941	0.0825479	0	0.0142341	3.89577	2.06862	0.553986
chr1	130756327	130757327	p300_3070:::chr1:::130756827	25.4048	93.2424	3.67027	1.87589	3.83978e-09	1.58769e-07	4.99109	3.8728	1.1235	4.14792	0.71274	1.51095	1.44779	0.433377	0	0	16.9653	13.6622	4.86561
chr1	130758031	130759031	p300_3072:::chr1:::130758531	1.80272	3.64907	2.0242	1.01735	0.623425	0.933728	3.48282	0.952774	0.508879	1.02848	0.685694	0.381904	2.20276	0.0309555	0	0.0142341	3.80411	3.32697	2.59656
chr1	130896016	130897016	p300_3074:::chr1:::130896516	0.582381	2.841	4.87825	2.28636	0.416092	0.754197	2.03697	0.671744	0.396832	0.956629	0.562745	0.625412	2.44829	0.0103185	0	0	4.34381	1.25088	1.77174
chr1	130897909	130898909	p300_3075:::chr1:::130898409	0.582381	0	0	#NAME?	0.903996	1	3.80674	0.622818	0.289087	0.997824	0.38757	0.759342	1.42216	0.0103185	0	0	4.18706	3.36657	1.37136
chr1	131003404	131004404	p300_3077:::chr1:::131003904	6.04612	31.8804	5.27287	2.39859	4.88116e-05	0.00063508	2.35852	0.777782	0.570908	3.8982	0.452151	0.388131	3.77792	0.103185	0.00612614	0	9.79085	4.77541	4.42315
chr1	132196275	132197275	p300_3082:::chr1:::132196775	6.15727	24.3186	3.94957	1.9817	0.00182643	0.0135128	2.52307	1.95776	0.999583	1.06875	1.23038	1.05024	1.27651	0.103185	0.0122523	0	3.17009	0.742626	2.63713
chr1	132248195	132249195	DHS_15070:::chr1:::132248695	0	2.841	Inf	Inf	0.197834	0.478357	3.2994	0.704039	0.505034	0.820326	0.508448	0.37456	1.4382	0	0	0	2.55393	2.62204	1.45901
chr1	132370519	132371519	p300_3084:::chr1:::132371019	11.6766	22.6769	1.94209	0.957608	0.0902287	0.279901	2.44504	1.45823	0.605183	1.64504	0.661437	0.970509	0.74326	0.196051	0.104144	0.0569363	2.85728	2.4989	2.98638
chr1	132409748	132410748	DHS_15091:::chr1:::132410248	9.12475	29.4306	3.22536	1.68946	0.00219348	0.0157263	2.42806	1.32292	0.542946	1.5865	0.666698	0.624789	0.810424	0.154777	0.0245046	0.0427022	1.5462	1.26775	2.65496
chr1	132445398	132446398	p300_3085:::chr1:::132445898	13.3126	24.1654	1.81523	0.860156	0.116509	0.334759	3.45919	1.3642	0.676878	1.25051	1.2357	0.825885	0.692026	0.227007	0.00612614	0	8.73255	3.74725	4.48435
chr1	132672942	132673942	DHS_15127:::chr1:::132673442	6.73965	7.27261	1.07908	0.109798	0.99313	1	3.2246	0.633167	0.421997	0.647369	0.453982	0.538392	1.03932	0.113503	0.00612614	0	2.14064	1.77361	2.01867
chr1	133042260	133043260	p300_3112:::chr1:::133042760	303.473	382.811	1.26143	0.335066	0.0160295	0.0772621	4.89772	2.89313	2.26168	4.64673	0.331787	2.73698	0.56968	5.15925	0.147027	0.298915	5.81183	9.10955	6.17585
chr1	133044221	133045221	p300_3113:::chr1:::133044721	231.475	252.015	1.08873	0.122651	0.439615	0.77969	5.07808	5.97177	2.11189	6.15956	0.379298	5.89655	0.39501	3.92103	0.183784	0.298915	5.11629	6.23242	4.01605
chr1	133045825	133046825	p300_3114:::chr1:::133046325	255.3	226.191	0.885981	-0.174652	0.272578	0.584246	4.68462	6.10002	2.17657	4.39539	0.33674	4.06984	0.25697	4.32345	0.171532	0.185043	3.58511	3.25603	2.42943
chr1	133442951	133443951	p300_3133:::chr1:::133443451	10.3451	23.6721	2.28824	1.19424	0.0368963	0.145657	2.6663	1.01735	0.647606	1.13145	0.738915	1.10569	0.404111	0.175414	0	0.0284681	2.11801	1.85235	1.6264
chr1	133444628	133445628	DHS_15271:::chr1:::133445128	4.93693	17.2586	3.49581	1.80563	0.0145679	0.0716752	3.2245	1.46385	0.87176	1.31111	0.614358	1.32003	0.383989	0.0825479	0	0.0427022	1.05419	1.50867	2.23226
chr1	133451384	133452384	p300_3134:::chr1:::133451884	9.65156	17.0205	1.76349	0.818437	0.226514	0.521838	2.05049	2.21879	1.25546	0.97301	0.689381	1.09237	0.362104	0.165096	0	0	3.44613	2.01994	2.62747
chr1	133615190	133616190	p300_3142:::chr1:::133615690	23.4087	34.177	1.46001	0.545976	0.189968	0.467232	3.04508	2.10402	0.781283	1.56173	1.03326	1.04475	0.470004	0.392103	0.00612614	0.0142341	14.3357	6.26879	5.19266
chr1	133719896	133720896	p300_3152:::chr1:::133720396	52.9458	40.4628	0.764231	-0.387919	0.257764	0.569334	3.08744	1.42324	0.731752	1.13295	0.816372	1.11054	0.516793	0.897709	0.0183784	0.0284681	4.2546	3.48839	2.9948
chr1	133749801	133750801	DHS_15339:::chr1:::133750301	17.0847	74.4188	4.35586	2.12296	7.5579e-09	2.91247e-07	2.0735	0.544612	0.337049	0.838777	0.71274	0.944345	0.51651	0.288918	0.0122523	0.0427022	1.34379	0.88143	1.45467
chr1	133754538	133755538	DHS_15340:::chr1:::133755038	18.8319	60.2393	3.19879	1.67753	1.16825e-05	0.000185496	2.99668	1.02231	0.421791	1.07842	0.543826	0.576115	0.492124	0.319873	0.0367568	0	1.65537	2.27502	1.41238
chr1	133776112	133777112	DHS_15353:::chr1:::133776612	67.9499	111.564	1.64186	0.715332	0.00376186	0.0244531	3.27908	2.13869	1.11539	1.07227	0.427611	1.52348	0.209774	1.15567	0.263424	0.185043	1.33409	3.50026	2.48994
chr1	133786310	133787310	p300_3158:::chr1:::133786810	186.905	214.053	1.14525	0.195658	0.241308	0.545228	5.04614	3.63709	1.23955	5.74247	0.384188	3.69326	0.315731	3.16778	0.0551353	0.241979	26.4156	15.6032	6.93842
chr1	133787712	133788712	p300_3159:::chr1:::133788212	376.807	314.976	0.835908	-0.258583	0.0588633	0.206564	5.09529	2.91756	1.26394	5.56038	0.384572	3.70993	0.475145	6.37683	0.373695	0.370086	25.721	11.8049	6.22532
chr1	133797293	133798293	p300_3161:::chr1:::133797793	30.4529	60.0862	1.97309	0.980453	0.00426818	0.0270617	4.36966	1.14557	0.425383	1.30512	0.378069	1.57605	0.335295	0.515925	0.0122523	0.0142341	3.59835	1.86625	1.59933
chr1	133799826	133800826	DHS_15366:::chr1:::133800326	20.8013	45.9833	2.21059	1.14443	0.00427839	0.0271209	2.81142	0.855819	0.419306	1.1962	0.619435	1.66947	0.376622	0.350829	0	0.0284681	1.73223	1.83959	1.18236
chr1	133801762	133802762	DHS_15367:::chr1:::133802262	10.5674	24.1399	2.28438	1.1918	0.0315011	0.129457	3.53057	0.590668	0.379612	1.03528	0.370572	1.24086	0.24239	0.175414	0.0122523	0	1.18241	2.17161	2.35397
chr1	133839465	133840465	DHS_15389:::chr1:::133839965	207.984	217.795	1.04717	0.0664976	0.682301	0.962281	1.92793	0.796111	0.533755	1.19673	0.402885	1.18631	0.421845	3.51861	0.122523	0.469724	0.997518	1.20794	1.23736
chr1	133841968	133842968	p300_3164:::chr1:::133842468	184.547	194.897	1.05609	0.0787289	0.692134	0.970726	2.45098	4.26959	1.44771	3.91812	0.386769	2.11466	0.350489	3.13682	0.0918921	0.0854044	2.70558	1.73138	2.2859
chr1	133899473	133900473	DHS_15414:::chr1:::133899973	8.01557	12.4357	1.55144	0.633612	0.401226	0.737743	2.73332	0.942986	0.411949	1.30341	0.658045	1.32553	0.295917	0.13414	0.0122523	0.0142341	2.50211	2.39868	1.60933
chr1	134049642	134050642	p300_3185:::chr1:::134050142	101.288	162.634	1.60566	0.683165	0.000777931	0.00660285	2.11843	5.21991	2.22977	1.98231	0.834751	3.72086	0.309622	1.71287	0.0796398	0	3.92203	2.64403	2.01708
chr1	134053648	134054648	p300_3187:::chr1:::134054148	105.169	121.703	1.15722	0.21066	0.427497	0.766984	1.91291	6.46784	3.39252	1.73478	0.595989	3.2674	0.248503	1.79542	0.140901	0	4.32743	3.96067	4.56803
chr1	134055006	134056006	p300_3188:::chr1:::134055506	148.799	142.399	0.956985	-0.0634319	0.806009	1	2.64947	5.78931	2.34043	2.69119	0.813843	3.1486	0.288963	2.50739	0.0490091	0	11.4788	8.37933	4.09128
chr1	134064348	134065348	p300_3189:::chr1:::134064848	50.5873	74.2317	1.4674	0.55326	0.201071	0.482202	1.96164	3.93493	1.39157	1.34693	1.12278	2.36719	0.600056	0.866753	0.042883	0.0142341	3.09603	2.19324	2.55175
chr1	134083744	134084744	p300_3190:::chr1:::134084244	47.7866	38.2939	0.801352	-0.319492	0.350618	0.685411	1.66633	0.79835	0.461999	1.05326	2.18323	0.829243	0.583286	0.815161	0	0	10.8646	4.15316	2.3635
chr1	134157339	134158339	DHS_15510:::chr1:::134157839	16.4468	42.9041	2.60866	1.38331	0.00144081	0.0110913	1.8531	0.733329	0.453843	1.42815	0.414266	1.02704	0.413403	0.278599	0.00612614	0.0284681	2.60976	2.39654	2.80561
chr1	134160821	134161821	p300_3200:::chr1:::134161321	396.663	726.818	1.83233	0.873679	5.10733e-14	5.98386e-12	3.33981	3.74678	1.60533	8.86692	0.223871	7.41603	0.670043	6.72766	0.0612614	0.185043	6.61937	4.18566	3.69743
chr1	134163053	134164053	p300_3202:::chr1:::134163553	283.143	538.921	1.90335	0.928544	9.6458e-13	8.91911e-11	4.19612	3.15021	1.02437	6.33645	0.392112	4.3051	0.891924	4.81874	0.042883	0.0711703	5.00216	5.75198	4.90544
chr1	134164939	134165939	p300_3203:::chr1:::134165439	109.608	199.644	1.82143	0.865072	6.44752e-06	0.000110876	4.65133	3.65368	1.52592	3.68512	0.417168	3.44461	0.24731	1.85733	0.0673875	0.113873	7.73644	4.07446	5.02529
chr1	134167559	134168559	DHS_15519:::chr1:::134168059	39.162	64.6454	1.65072	0.723093	0.0222871	0.0997044	2.1185	1.39726	0.684581	1.60292	0.448107	1.45747	0.395288	0.660383	0.0245046	0.0427022	2.35677	2.20839	1.76952
chr1	134173379	134174379	p300_3204:::chr1:::134173879	24.4068	46.1193	1.88961	0.918088	0.0262641	0.112873	1.74005	2.47266	0.89105	1.90181	0.446457	1.70959	0.499239	0.41274	0.00612614	0.0854044	6.0094	8.26341	2.42156
chr1	134184374	134185374	p300_3207:::chr1:::134184874	43.4054	132.761	3.05863	1.61289	3.30324e-10	1.78383e-08	3.24489	3.28451	1.20017	2.54607	0.507043	1.89148	0.220296	0.732613	0.128649	0.128107	9.39616	8.90684	6.0825
chr1	134187467	134188467	p300_3208:::chr1:::134187967	100.29	144.117	1.437	0.523059	0.0126912	0.0645148	3.49688	4.60545	2.1275	3.45081	0.445294	3.34585	0.240698	1.69223	0.128649	0.142341	3.90005	2.85716	3.41831
chr1	134189124	134190124	p300_3209:::chr1:::134189624	92.3857	109.616	1.18651	0.246722	0.270356	0.581308	2.41472	3.79781	1.61747	2.40376	0.504636	2.36328	0.24646	1.55809	0.0980183	0	5.47889	4.21338	3.38509
chr1	134238360	134239360	p300_3221:::chr1:::134238860	33.1715	41.858	1.26187	0.33556	0.463292	0.802173	3.15035	2.51912	0.665719	2.95902	0.440168	1.56032	0.344816	0.557199	0.0306307	0.0427022	6.31641	6.02635	4.00109
chr1	134292964	134293964	DHS_15573:::chr1:::134293464	31.7288	42.4363	1.33747	0.419506	0.271087	0.581877	2.9523	1.18765	0.5128	0.878444	1.00053	0.915936	0.651889	0.536562	0.0245046	0.0854044	0.479178	0.502891	1.25923
chr1	134454343	134455343	p300_3244:::chr1:::134454843	6.79523	15.4809	2.2782	1.1879	0.107479	0.316799	1.70496	2.54828	0.993393	0.929852	0.902923	1.59213	0.539497	0.113503	0	0	4.4053	1.89886	2.2176
chr1	134661548	134662548	p300_3260:::chr1:::134662048	1.91387	5.31625	2.77774	1.47391	0.329485	0.65932	1.53186	2.00087	1.15861	0.761732	1.22124	0.811546	0.538031	0.0309555	0.00612614	0	2.26839	1.17229	2.01166
chr1	134696440	134697440	p300_3263:::chr1:::134696940	9.29148	22.0559	2.37378	1.24719	0.0337987	0.136567	3.17589	3.94107	1.28194	1.80453	0.874326	1.1199	0.371229	0.154777	0.0183784	0	6.78355	4.94392	4.75885
chr1	134698676	134699676	DHS_15694:::chr1:::134699176	1.80272	2.37315	1.31643	0.396629	0.984035	1	2.06587	0.859967	0.642807	0.795246	1.35331	0.8061	0.584974	0.0309555	0	0	2.94518	3.96533	3.00881
chr1	134706185	134707185	DHS_15696:::chr1:::134706685	0	2.00741	Inf	Inf	0.358611	0.690707	1.69489	1.39733	0.542452	1.47135	1.80837	1.01598	0.993921	0	0.00612614	0	2.46831	1.50339	2.10599
chr1	134747070	134748070	p300_3265:::chr1:::134747570	31.3953	41.5517	1.3235	0.404355	0.311291	0.636812	2.85339	3.41162	1.22208	5.501	0.392785	1.4106	1.8344	0.536562	0	0	15.4405	10.4654	6.72421
chr1	134749281	134750281	DHS_15711:::chr1:::134749781	3.71659	4.04034	1.08711	0.120495	1	1	2.15402	1.41075	0.885384	0.990377	1.20805	1.22095	0.796608	0.061911	0.0122523	0	2.61989	3.34647	1.85296
chr1	134844011	134845011	p300_3276:::chr1:::134844511	5.46374	6.07327	1.11156	0.152585	0.99213	1	1.72057	2.00707	1.1478	0.844215	1.5285	0.908601	0.799517	0.0928664	0.0245046	0	3.76124	2.92969	2.52719
chr1	134924255	134925255	DHS_15777:::chr1:::134924755	68.5057	88.9979	1.29913	0.377547	0.136542	0.373617	3.16689	2.30678	1.15062	1.35108	0.437616	1.74622	0.185528	1.15567	0.0673875	0.113873	1.43357	2.82096	1.85509
chr1	135014432	135015432	DHS_15822:::chr1:::135014932	163.692	194.94	1.19089	0.252046	0.273771	0.586076	2.06729	2.41562	1.75411	2.44628	0.318409	1.86394	0.916389	2.76536	0.0306307	0.0996385	1.34108	6.93948	3.82679
chr1	135022223	135023223	p300_3295:::chr1:::135022723	107.39	170.281	1.58563	0.665059	0.000764828	0.00650687	2.54594	2.99637	1.40013	2.49155	0.302468	3.33445	0.572166	1.81605	0.0367568	0.0711703	4.25643	3.29538	4.95926
chr1	135025695	135026695	p300_3296:::chr1:::135026195	621.621	626.098	1.0072	0.0103534	0.931124	1	5.7523	6.18091	2.68428	7.46186	0.390552	5.54596	0.250977	10.5352	0.245046	0.142341	10.9085	9.54026	6.51506
chr1	135042259	135043259	p300_3298:::chr1:::135042759	104.478	112.713	1.07882	0.109451	0.624298	0.933728	2.0333	5.56003	2.94423	1.83081	0.398145	2.90247	0.151915	1.76446	0.00612614	0.0427022	4.68721	4.45576	4.9497
chr1	135077161	135078161	p300_3303:::chr1:::135077661	14.5329	33.6241	2.31365	1.21017	0.0123683	0.0631921	1.82062	7.12912	6.75854	1.31957	2.39556	2.84041	0.299586	0.247644	0.202163	0.0284681	4.06811	3.18485	3.37018
chr1	135084193	135085193	p300_3305:::chr1:::135084693	18.1939	32.6884	1.79667	0.845324	0.0686323	0.229705	2.19147	1.40735	0.882749	1.68822	0.374683	1.22428	0.737872	0.309555	0.122523	0.0569363	2.24365	2.94335	2.20708
chr1	135097672	135098672	p300_3307:::chr1:::135098172	5.51931	22.3367	4.04701	2.01686	0.00267188	0.0185001	1.5903	1.35144	0.636649	0.938358	0.602496	0.944345	0.5739	0.0928664	0.0367568	0.0996385	2.72957	1.28542	2.17364
chr1	135105386	135106386	p300_3308:::chr1:::135105886	27.7343	61.8383	2.22967	1.15683	0.00501138	0.0307485	3.09553	4.16722	1.92128	2.21273	1.16916	2.52784	0.415957	0.474651	0.0796398	0.0284681	4.07583	4.49819	3.05251
chr1	135111481	135112481	DHS_15867:::chr1:::135111981	12.9525	46.6892	3.60465	1.84986	2.69457e-05	0.000382107	1.5786	1.51281	0.760014	1.15746	1.11224	1.4929	0.494874	0.216688	0.0735137	0.0569363	1.85265	1.62028	1.69662
chr1	135122216	135123216	p300_3309:::chr1:::135122716	29.1214	23.5955	0.810246	-0.303568	0.523336	0.852446	1.58226	1.88973	0.715675	0.999703	1.40213	1.66894	0.565389	0.495288	0.15928	0.0427022	3.71891	4.02277	2.18214
chr1	135133325	135134325	p300_3310:::chr1:::135133825	39.4109	67.7161	1.71821	0.780904	0.0144875	0.0713633	2.0381	3.644	1.36815	1.33772	0.617561	1.87979	0.53934	0.670702	0.0306307	0.0142341	3.31554	3.24371	2.01376
chr1	135135996	135136996	DHS_15874:::chr1:::135136496	13.3126	26.4875	1.98966	0.992525	0.0597675	0.209053	2.05965	1.74333	0.77766	1.26821	0.872917	1.4133	0.46117	0.227007	0.196037	0.0569363	1.25695	1.64893	1.54833
chr1	135203082	135204082	p300_3313:::chr1:::135203582	3.02306	5.5799	1.84578	0.884229	0.521146	0.851399	2.22249	1.15345	0.713847	1.19775	0.412339	1.05472	0.39624	0.0515925	0	0	2.83493	1.9689	2.83853
chr1	135243478	135244478	p300_3319:::chr1:::135243978	2.49625	17.3862	6.96492	2.80011	0.00112798	0.0090366	1.84845	1.5751	0.793058	1.5292	0.667345	1.52762	0.644487	0.041274	0.00612614	0	4.63163	4.29373	2.80311
chr1	135328840	135329840	p300_3336:::chr1:::135329340	17.3337	21.7668	1.25575	0.328551	0.632778	0.933728	3.93883	2.0136	0.910421	2.49612	0.574648	1.30254	0.431774	0.299236	0.0122523	0.0427022	3.76493	2.75447	3.76207
chr1	135330669	135331669	p300_3337:::chr1:::135331169	188.181	163.927	0.871114	-0.199067	0.258743	0.570647	3.10615	7.3105	3.05626	3.38499	0.398969	3.49158	0.436933	3.18841	0.0918921	0.0284681	4.63923	5.36616	3.36663
chr1	135344567	135345567	p300_3338:::chr1:::135345067	414.248	307.414	0.742101	-0.430312	0.00122572	0.00967195	2.5835	6.46704	2.92311	1.69341	0.945694	3.90708	0.399496	7.01657	0.0980183	0.0427022	7.05338	6.89442	9.12733
chr1	135348712	135349712	DHS_15955:::chr1:::135349212	84.5368	71.5351	0.846201	-0.240928	0.440479	0.780308	2.09919	3.06193	1.10402	2.03911	1.16568	1.92174	0.757548	1.42395	0.0245046	0	3.44906	4.03989	2.75885
chr1	135370825	135371825	DHS_15958:::chr1:::135371325	6.04612	11.7042	1.93582	0.952947	0.260312	0.572486	1.57692	1.13251	0.557848	0.965487	0.665879	0.76646	0.70243	0.103185	0	0	1.68411	2.20931	2.44273
chr1	135379139	135380139	p300_3339:::chr1:::135379639	1.27592	6.12432	4.79994	2.26302	0.125499	0.353216	2.05882	0.798764	0.593207	0.770985	1.00399	1.11669	0.439034	0.020637	0	0	2.30964	1.69675	1.26907
chr1	135388841	135389841	p300_3340:::chr1:::135389341	121.118	160.652	1.32641	0.407528	0.0396347	0.153961	2.30211	7.4291	3.90135	3.17265	0.344627	4.21806	0.179709	2.05338	0.0367568	0.0427022	25.3072	11.663	4.15794
chr1	135397181	135398181	DHS_15968:::chr1:::135397681	8.48679	27.8656	3.2834	1.71519	0.00272295	0.0187917	2.43383	0.866826	0.437117	1.33097	0.435271	0.835031	0.788882	0.144459	0	0	1.93089	0.974249	1.24193
chr1	135400958	135401958	p300_3343:::chr1:::135401458	14.0617	45.5665	3.24047	1.6962	0.000110843	0.00128209	4.19142	2.21156	0.845368	1.99673	0.624668	1.58608	0.511743	0.237325	0.00612614	0	8.5765	2.86214	1.12331
chr1	135402916	135403916	DHS_15972:::chr1:::135403416	19.4698	43.0318	2.21018	1.14416	0.00649304	0.0378746	1.92312	0.997371	0.885624	1.74971	0.459315	0.719025	1.1006	0.330192	0	0	2.25697	3.25691	1.43784
chr1	135416978	135417978	p300_3344:::chr1:::135417478	131.463	204.024	1.55195	0.634082	0.00056677	0.00506565	2.19674	5.17601	2.69002	1.18616	0.720617	2.41672	0.930098	2.22879	0.0122523	0	2.91437	2.4851	4.26447
chr1	135424321	135425321	p300_3345:::chr1:::135424821	11.5099	22.2091	1.92957	0.948281	0.102894	0.307376	4.08644	2.26643	0.890872	1.63804	0.384965	0.79661	0.402698	0.196051	0.0245046	0.0142341	3.54239	5.29771	1.90411
chr1	135426902	135427902	p300_3346:::chr1:::135427402	1.80272	7.76598	4.30792	2.10699	0.0987105	0.299335	3.20363	0.908682	0.63012	1.23689	0.357163	0.683407	0.622984	0.0309555	0.00612614	0	2.65912	2.59138	1.36127
chr1	135495412	135496412	DHS_16003:::chr1:::135495912	255.909	201.881	0.788878	-0.342125	0.0284964	0.120051	2.87576	1.04975	0.664434	1.80073	0.48014	0.721374	0.393399	4.34409	0.551353	0.498192	1.82122	2.93218	2.07655
chr1	135588441	135589441	p300_3356:::chr1:::135588941	146.885	144.831	0.986015	-0.020318	0.972912	1	3.6507	2.4636	1.22549	2.85086	0.378127	3.89905	0.613175	2.47644	0.042883	0.185043	6.19344	1.86196	2.15776
chr1	135590693	135591693	p300_3358:::chr1:::135591193	403.599	341.744	0.846743	-0.240004	0.0709719	0.235895	3.39228	5.37344	1.87564	9.34988	0.238955	4.2678	0.176338	6.83084	0.128649	0.213511	18.6233	11.5103	7.26959
chr1	135592191	135593191	p300_3359:::chr1:::135592691	90.8319	109.582	1.20643	0.270746	0.246298	0.552496	4.05912	1.78208	0.604327	3.15978	0.320633	2.77791	0.268358	1.53746	0.042883	0.256213	10.3905	4.14854	2.93423
chr1	135659482	135660482	p300_3366:::chr1:::135659982	11.1498	32.8926	2.95007	1.56075	0.00436752	0.0275757	1.58489	1.22554	0.624616	1.17493	0.534513	1.21878	0.707016	0.185733	0.0796398	0.0142341	2.83493	1.42198	1.14537
chr1	135663169	135664169	DHS_16073:::chr1:::135663669	12.0367	26.6152	2.21118	1.14481	0.0353137	0.140836	1.62598	1.36825	0.703747	1.36924	0.896978	1.26241	0.705419	0.20637	0.085766	0	1.41145	1.34663	1.68596
chr1	135673905	135674905	p300_3367:::chr1:::135674405	99.7899	151.423	1.51742	0.601622	0.00401323	0.0257288	1.89757	4.91348	2.16876	1.37305	0.628455	2.40525	0.533535	1.69223	0.0918921	0.0427022	3.86012	5.06393	3.38132
chr1	135694749	135695749	p300_3368:::chr1:::135695249	11.5099	10.4794	0.910468	-0.13532	0.906565	1	2.2122	1.79283	1.00922	0.914434	2.09696	1.69285	0.604322	0.196051	0.134775	0.0142341	3.1104	3.29905	1.14623
chr1	135697216	135698216	p300_3369:::chr1:::135697716	61.7661	49.7089	0.804793	-0.31331	0.318588	0.645806	1.82773	6.62143	6.4063	0.862511	2.17991	3.05022	0.361512	1.04217	0.925047	0.0427022	3.87971	4.61247	3.3671
chr1	135738624	135739624	DHS_16093:::chr1:::135739124	3.07864	10.8706	3.53099	1.82007	0.0604872	0.210625	1.72384	1.74678	0.921129	0.814476	0.888974	1.02829	0.561424	0.0515925	0	0	1.86492	1.41145	1.37086
chr1	135752920	135753920	p300_3372:::chr1:::135753420	14.0617	30.681	2.18189	1.12558	0.0226332	0.100834	1.5376	2.11123	0.855851	1.66304	0.847621	0.971158	0.649811	0.237325	0.0306307	0	3.39088	2.434	1.26097
chr1	135759907	135760907	DHS_16105:::chr1:::135760407	1.22034	3.13017	2.565	1.35896	0.69019	0.968925	1.51214	1.42316	0.624166	1.45754	0.997038	0.961833	0.869546	0.020637	0	0	2.41073	2.24438	2.27582
chr1	135782029	135783029	DHS_16108:::chr1:::135782529	7.32203	14.4686	1.97604	0.982613	0.179543	0.449062	1.64663	2.47862	1.18706	0.781629	1.26909	0.95677	0.61732	0.123822	0.00612614	0	2.30964	2.63124	1.63353
chr1	135783316	135784316	DHS_16109:::chr1:::135783816	3.66102	3.15569	0.861972	-0.214287	1	1	2.38686	2.3785	1.19137	1.00723	1.74722	1.50209	0.691557	0.061911	0.00612614	0	1.95933	1.40202	1.9858
chr1	135786211	135787211	DHS_16111:::chr1:::135786711	102.564	78.6207	0.766552	-0.383545	0.116576	0.334899	2.51006	5.80717	2.67555	1.05869	1.5482	2.34261	0.40491	1.73351	0.122523	0	3.15492	3.51408	4.44402
chr1	135787769	135788769	p300_3373:::chr1:::135788269	31.3132	21.8433	0.697577	-0.519575	0.255693	0.566451	1.87357	1.42519	0.581216	0.95419	0.92843	0.835652	0.447472	0.526243	0.0673875	0.0142341	4.74505	3.5999	1.91207
chr1	135951358	135952358	p300_3386:::chr1:::135951858	13.7282	43.6101	3.17668	1.66752	0.000251399	0.00256139	1.90684	1.97851	0.840035	1.2013	0.779777	1.00228	0.639687	0.237325	0.0122523	0	2.76731	2.79255	3.01948
chr1	135957267	135958267	p300_3387:::chr1:::135957767	371.703	333.545	0.897342	-0.15627	0.244016	0.548847	2.96954	7.60141	5.23837	3.30281	1.71475	3.24618	0.47825	6.29428	0.58811	0.0996385	15.2075	10.9725	7.72023
chr1	135959274	135960274	p300_3388:::chr1:::135959774	253.246	244.972	0.967329	-0.0479208	0.736396	1	2.66635	7.75755	5.00442	2.53562	1.92887	4.93741	0.297578	4.30281	0.281802	0.0284681	8.78232	7.55609	4.8365
chr1	135966364	135967364	DHS_16163:::chr1:::135966864	24.24	45.3283	1.86998	0.903021	0.0227737	0.101324	2.72923	1.86482	0.625137	1.26637	1.37169	1.6673	0.527564	0.41274	0.0673875	0	1.52778	1.29685	1.2345
chr1	135979441	135980441	p300_3393:::chr1:::135979941	45.2637	82.2952	1.81813	0.862455	0.0026208	0.018206	2.0136	2.54414	0.920945	1.48114	0.810128	1.52945	0.553552	0.763568	0.00612614	0	3.60881	3.64173	3.4154
chr1	135982320	135983320	p300_3394:::chr1:::135982820	71.6955	81.4106	1.13551	0.183334	0.469362	0.809184	2.2061	3.40345	2.14255	1.33377	1.34278	2.77312	0.583994	1.20726	0.0306307	0.0142341	5.68705	5.02448	4.8869
chr1	135989244	135990244	p300_3395:::chr1:::135989744	312.709	190.968	0.610688	-0.711493	2.67704e-06	5.14806e-05	2.11059	8.02015	7.81917	2.49562	1.27537	5.43098	0.319849	5.31402	0.324685	0.113873	3.97199	5.01769	2.34297
chr1	135995589	135996589	p300_3397:::chr1:::135996089	574.473	610.329	1.06242	0.0873488	0.441727	0.781389	2.2182	6.74651	5.39396	5.74684	0.411278	4.90985	0.425942	9.73034	0.9373	0.142341	3.89751	9.15287	6.49479
chr1	135997158	135998158	p300_3398:::chr1:::135997658	161.527	294.162	1.82113	0.864836	1.16276e-07	3.27217e-06	1.51754	1.81463	1.05757	3.88598	0.527493	2.31757	0.68405	2.74472	0.18991	0.0284681	3.50116	2.81508	3.03541
chr1	136290092	136291092	p300_3419:::chr1:::136290592	93.0236	105.474	1.13384	0.181218	0.415691	0.754197	2.26895	2.01128	0.866872	1.84131	0.497084	2.05514	0.178054	1.56841	0	0.0284681	2.65858	3.37868	3.37413
chr1	136331679	136332679	p300_3427:::chr1:::136332179	190.955	193.8	1.0149	0.0213353	0.918159	1	3.86167	2.81451	1.60938	2.99721	0.312851	1.85795	0.200681	3.22969	0.759641	0.284681	4.15883	4.6764	4.74593
chr1	136409787	136410787	p300_3434:::chr1:::136410287	79.0707	79.2927	1.00281	0.00404404	0.989116	1	2.23397	7.90444	7.88497	0.921601	3.19108	3.29691	0.465173	1.35172	0.0612614	0.113873	4.39072	4.73424	2.83788
chr1	136413487	136414487	DHS_16319:::chr1:::136413987	23.0197	36.2865	1.57632	0.656562	0.126708	0.355638	1.77057	2.33557	1.12021	0.859237	0.886464	1.9553	0.40903	0.392103	0.0306307	0.0854044	0.945466	2.39204	1.00835
chr1	136422948	136423948	p300_3437:::chr1:::136423448	8.48679	27.032	3.18518	1.67137	0.00378975	0.0246064	1.86418	1.03873	0.688769	0.935857	0.574817	1.4887	0.500335	0.144459	0	0	2.50088	0.964941	1.31792
chr1	136431328	136432328	p300_3438:::chr1:::136431828	157.45	358.875	2.27929	1.18859	3.08425e-14	3.77048e-12	2.93638	2.30288	0.951815	4.42678	0.31029	2.19058	0.799812	2.67249	0.0367568	0.0427022	14.5694	13.2605	4.31702
chr1	136534818	136535818	p300_3451:::chr1:::136535318	178.945	256.847	1.43534	0.521389	0.0119956	0.061672	2.14249	1.22715	0.690418	0.803183	0.539618	1.21505	0.324622	3.03364	0.0490091	0.355852	1.99997	4.06246	2.27335
chr1	137070793	137071793	p300_3475:::chr1:::137071293	15.1153	26.275	1.7383	0.797679	0.127863	0.357524	2.99404	1.75284	0.823899	1.31657	0.474733	1.23355	0.34434	0.257962	0.0122523	0	10.3164	10.5037	2.43698
chr1	137077093	137078093	p300_3476:::chr1:::137077593	45.5126	34.2025	0.751495	-0.412166	0.254088	0.564114	1.58382	2.93139	1.36815	1.66061	0.507772	1.39009	0.450323	0.773887	0.00612614	0.0284681	5.33858	4.57068	2.75214
chr1	137079681	137080681	p300_3478:::chr1:::137080181	104.2	67.8777	0.651417	-0.618347	0.0116837	0.0603714	2.27961	3.40847	1.39575	1.9125	0.528786	2.36345	0.297333	1.76446	0.0551353	0.0284681	8.55984	4.91697	2.9948
chr1	137082098	137083098	p300_3479:::chr1:::137082598	102.175	61.0984	0.597978	-0.741835	0.00296062	0.0201011	3.02303	3.82665	1.06784	3.2253	0.438625	2.36358	0.361993	1.73351	0.0183784	0	7.45044	7.81914	4.86295
chr1	137086822	137087822	DHS_16538:::chr1:::137087322	72.3601	238.099	3.29048	1.7183	1.04984e-17	2.17618e-15	2.31134	1.75719	1.42598	1.62408	0.310616	2.38356	0.504169	1.2279	0.0122523	0.0142341	3.14951	3.28417	2.07396
chr1	137092145	137093145	p300_3480:::chr1:::137092645	92.4123	89.8315	0.972073	-0.0408632	0.888629	1	2.13841	2.39939	1.11769	1.58397	0.419021	1.86215	0.255808	1.56841	0.134775	0.0711703	20.5301	10.3346	4.17035
chr1	137095239	137096239	p300_3482:::chr1:::137095739	247.867	234.348	0.94546	-0.0809114	0.618542	0.932246	2.80667	7.30782	3.01777	5.18056	0.325197	2.50384	0.216881	4.19963	0.165406	0.0996385	19.426	11.92	5.48027
chr1	137096610	137097610	DHS_16542:::chr1:::137097110	58.2694	58.5976	1.00563	0.00810399	0.992949	1	3.18203	2.3728	1.09045	2.25273	0.739886	1.69565	0.486127	1.00089	0.0306307	0.0284681	2.28247	1.7823	2.01234
chr1	137101541	137102541	p300_3483:::chr1:::137102041	216.582	217.14	1.00258	0.00371253	0.983347	1	1.99558	3.2695	1.24519	2.26039	0.518575	2.43668	0.39031	3.66306	0.104144	0.0569363	4.18876	3.35809	1.87629
chr1	137110267	137111267	DHS_16547:::chr1:::137110767	48.758	82.9673	1.70161	0.766905	0.00705799	0.0405394	1.66055	0.978252	0.414582	1.61522	0.675765	1.41048	0.577567	0.825479	0.042883	0.0284681	2.80403	3.09768	2.11541
chr1	137113906	137114906	p300_3485:::chr1:::137114406	250.058	253.912	1.01541	0.0220632	0.897789	1	3.61906	4.53296	1.45394	6.89861	0.296695	2.29142	0.219108	4.23058	0.251172	0.0569363	30.8823	16.1093	9.95557
chr1	137130862	137131862	p300_3486:::chr1:::137131362	315.099	281.284	0.892684	-0.163778	0.479942	0.813249	1.94283	3.95598	2.44296	1.65745	0.451814	3.75786	0.467128	5.31402	0.177658	0.0996385	2.86467	2.34877	3.77827
chr1	137144773	137145773	p300_3487:::chr1:::137145273	355.312	318.353	0.895982	-0.158459	0.249317	0.55709	2.3171	5.65452	4.9497	2.50686	0.424468	3.46149	0.241565	6.01568	0.434956	0.370086	19.9147	13.2945	5.34879
chr1	137211199	137212199	DHS_16588:::chr1:::137211699	89.2781	71.6544	0.802597	-0.317252	0.20358	0.486153	2.74141	1.42408	1.21802	0.774753	0.657593	1.81037	0.331096	1.51682	0.0735137	0.0569363	0.222081	0.874014	0.86214
chr1	137512196	137513196	p300_3523:::chr1:::137512696	15.2264	21.9454	1.44127	0.527342	0.352126	0.687562	1.99258	2.23586	0.887276	0.826403	0.921986	0.74912	0.342133	0.257962	0.177658	0.0854044	6.09981	8.15747	3.78457
chr1	137528468	137529468	p300_3527:::chr1:::137528968	78.324	146.464	1.86998	0.903024	4.16091e-05	0.000553861	3.38091	4.3932	2.11639	3.33356	0.299646	2.07756	0.419664	1.32077	0.416578	0.241979	12.0101	10.7562	4.72453
chr1	137555768	137556768	p300_3532:::chr1:::137556268	167.658	151.006	0.900684	-0.150908	0.429481	0.769387	2.11718	4.4207	1.70601	2.04012	0.472076	2.6534	0.276033	2.83759	0.483965	0.284681	9.94148	4.54487	2.72886
chr1	137564541	137565541	p300_3534:::chr1:::137565041	30.3417	47.6165	1.56934	0.650159	0.204766	0.487934	1.91591	1.75308	0.594793	1.58834	0.991592	1.37138	0.477611	0.515925	0.183784	0.0569363	17.7854	6.56212	2.1761
chr1	137571922	137572922	p300_3536:::chr1:::137572422	73.7205	103.543	1.40454	0.490094	0.0560444	0.198705	3.59179	5.15215	1.67298	5.09842	0.631157	2.29643	0.239647	1.23822	0.226667	0.0854044	18.0535	10.4525	7.04771
chr1	137590463	137591463	p300_3541:::chr1:::137590963	44.9858	120.895	2.68741	1.42622	5.57111e-08	1.70903e-06	1.99336	2.94204	1.63869	1.47514	0.969928	1.63206	0.332925	0.763568	0.0306307	0.0142341	6.18881	4.60346	1.52423
chr1	137595632	137596632	p300_3543:::chr1:::137596132	45.2637	86.9821	1.92168	0.942364	0.00089602	0.00744438	2.63521	7.00768	4.53144	1.16736	2.52642	3.98559	0.298906	0.763568	0.0490091	0.0284681	5.00421	3.70323	6.20741
chr1	137596911	137597911	p300_3544:::chr1:::137597411	7.37761	27.5253	3.73093	1.89954	0.00122814	0.0096866	1.9437	1.59013	0.984101	1.2171	1.48321	1.4187	0.271008	0.123822	0.00612614	0.0142341	3.76385	2.9177	3.26975
chr1	137608753	137609753	p300_3545:::chr1:::137609253	6.68407	20.9332	3.1318	1.64699	0.0122505	0.0627091	2.40395	1.12844	0.609968	1.5053	0.490205	0.947384	0.46183	0.113503	0.00612614	0.0569363	4.16329	2.47075	2.84173
chr1	137611147	137612147	p300_3546:::chr1:::137611647	34.9742	62.1446	1.77687	0.829339	0.0109334	0.0571993	2.93002	2.01301	0.498326	2.9899	0.451079	1.11697	0.393399	0.588154	0.00612614	0	3.72522	4.15392	3.70813
chr1	137615754	137616754	p300_3547:::chr1:::137616254	76.6035	115.562	1.50857	0.593186	0.0118814	0.06121	1.91181	3.08801	1.70407	1.84049	0.414307	2.97846	0.227415	1.30013	0.183784	0.156575	2.97634	3.82644	5.47503
chr1	137620428	137621428	p300_3549:::chr1:::137620928	56.5778	80.6025	1.42463	0.510588	0.137468	0.375448	1.66742	2.51784	1.20003	4.37789	0.482294	1.4302	0.268236	0.969938	0.0918921	0.142341	14.3934	12.9979	3.27863
chr1	137651661	137652661	DHS_16767:::chr1:::137652161	9.76271	22.2091	2.27489	1.1858	0.0460178	0.171726	1.68875	0.981218	0.467751	1.52324	1.191	1.08637	0.497304	0.165096	0	0	3.40464	2.53499	2.52803
chr1	137659821	137660821	p300_3554:::chr1:::137660321	38.7174	87.1181	2.2501	1.16999	7.97378e-05	0.000967206	2.36166	1.72573	0.853027	1.60649	1.70446	2.2297	0.637667	0.660383	0.0551353	0	6.06571	2.65245	3.71562
chr1	137677479	137678479	p300_3557:::chr1:::137677979	2.3851	12.0189	5.03916	2.33318	0.0197311	0.0906881	1.67218	2.09842	1.23222	1.22314	1.54656	1.31371	0.359739	0.041274	0	0	4.538	3.90957	2.46759
chr1	137684074	137685074	DHS_16778:::chr1:::137684574	19.3031	21.8178	1.13027	0.176673	0.798832	1	1.93631	2.88314	1.79629	1.14817	0.586174	2.15154	0.231479	0.330192	0	0.0284681	1.8128	2.99468	3.80946
chr1	137688385	137689385	p300_3558:::chr1:::137688885	52.6679	51.5887	0.979509	-0.0298695	0.93837	1	2.7761	3.20421	0.991511	2.68898	0.884846	1.78587	0.369993	0.897709	0.0245046	0.0427022	5.55901	4.25404	4.70348
chr1	137689959	137690959	p300_3559:::chr1:::137690459	145.718	127.751	0.876701	-0.189844	0.328435	0.658727	3.32557	9.4849	5.64465	2.05024	1.68996	4.11349	0.45452	2.47644	0.147027	0.0854044	3.05601	2.31291	4.31728
chr1	137753428	137754428	p300_3566:::chr1:::137753928	11.6766	17.0205	1.45766	0.543652	0.393832	0.727938	2.77821	3.14121	1.5506	1.32545	1.02456	2.01823	0.61259	0.196051	0.0122523	0	6.74726	7.26272	2.73818
chr1	137830097	137831097	DHS_16818:::chr1:::137830597	0	2.76442	Inf	Inf	0.26111	0.572888	2.00682	1.38115	0.641074	0.810432	1.16221	0.5613	0.862091	0	0	0	1.39776	1.22244	1.47086
chr1	138291350	138292350	DHS_16931:::chr1:::138291850	144.276	91.2945	0.632779	-0.660227	0.00276735	0.0190437	2.61888	4.1181	3.93047	1.3499	0.571178	1.37655	0.347337	2.4558	0.0183784	0	0.584718	3.4518	2.13898
chr1	138300093	138301093	p300_3600:::chr1:::138300593	11.5654	26.7683	2.31451	1.21071	0.0258751	0.111567	2.98504	1.47659	1.00086	1.49088	0.903654	0.845837	0.522876	0.196051	0	0	2.35843	1.28025	1.74857
chr1	138301695	138302695	p300_3601:::chr1:::138302195	21.8549	46.7658	2.13983	1.09749	0.00581125	0.0346959	2.72607	2.56308	1.06539	2.16705	0.48624	1.393	0.849306	0.371466	0	0	3.62817	3.94702	2.43117
chr1	138353684	138354684	p300_3606:::chr1:::138354184	6.21285	6.90686	1.11171	0.152775	0.947763	1	1.78286	0.850419	0.506815	0.847258	1.0142	1.02403	0.386975	0.103185	0.00612614	0	3.86154	3.05859	1.13139
chr1	138436561	138437561	DHS_16981:::chr1:::138437061	13.895	34.0665	2.45171	1.29379	0.0080104	0.0448131	2.15453	1.37116	0.578581	1.19527	1.38369	1.55622	0.636771	0.237325	0.00612614	0.0711703	1.12454	1.7022	1.91156
chr1	138452110	138453110	DHS_16992:::chr1:::138452610	50.2562	82.8397	1.64835	0.72102	0.00976132	0.0524865	3.3846	3.70362	1.22454	2.92857	0.64916	1.66268	0.321507	0.846116	0.0245046	0.0142341	3.02788	2.49414	3.23828
chr1	138453731	138454731	p300_3615:::chr1:::138454231	63.651	161.103	2.53104	1.33973	3.3747e-09	1.41429e-07	2.3368	1.42956	0.746485	1.57989	0.435332	0.936818	0.368317	1.08344	0.0245046	0	2.40264	4.57538	3.00881
chr1	138456068	138457068	DHS_16994:::chr1:::138456568	23.0197	91.7795	3.987	1.9953	1.00245e-09	4.82136e-08	1.77085	1.08528	0.748417	1.24625	0.494848	1.10895	0.481221	0.392103	0	0	2.08011	2.35242	3.17011
chr1	138462012	138463012	p300_3617:::chr1:::138462512	51.7255	129.708	2.50762	1.32632	1.10943e-07	3.14172e-06	3.79847	2.41385	1.00158	3.4202	0.290542	2.81812	0.484819	0.877072	0.042883	0.0427022	7.61419	3.24634	3.22118
chr1	138533019	138534019	DHS_17029:::chr1:::138533519	192.009	183.397	0.955151	-0.0661997	0.706229	0.981781	2.1317	0.867745	0.611806	1.41825	0.400225	1.19991	0.447472	3.25033	0.263424	0.241979	0.914708	1.19997	1.50234
chr1	138534309	138535309	p300_3629:::chr1:::138534809	155.481	128.882	0.828928	-0.270682	0.16508	0.42311	2.3887	2.73738	1.15175	1.8136	0.35461	1.55586	0.356565	2.64153	0.214415	0.0996385	2.3233	3.31677	2.04057
chr1	138540679	138541679	p300_3630:::chr1:::138541179	136.344	196.981	1.44473	0.530803	0.00405337	0.0259465	3.88268	5.91578	3.46236	3.53251	0.340238	3.27229	0.300028	2.31134	0.318559	0.128107	4.95365	5.52371	4.10499
chr1	138555644	138556644	p300_3632:::chr1:::138556144	69.2548	144.1	2.08072	1.05708	2.96778e-06	5.6399e-05	2.7934	4.34596	1.93101	1.62926	0.837245	2.18828	0.432347	1.16599	0.110271	0.0427022	3.24793	2.63765	4.24912
chr1	138558240	138559240	p300_3633:::chr1:::138558740	125.666	139.413	1.10939	0.149769	0.477929	0.811819	3.6963	4.959	1.90012	2.46462	0.877785	2.62941	0.215213	2.13593	0.312433	0.0569363	3.23349	2.80267	2.75885
chr1	138561421	138562421	p300_3634:::chr1:::138561921	26.2651	67.4437	2.56781	1.36054	0.000464719	0.0042954	3.13679	1.20791	0.811174	3.62337	0.636994	1.62936	0.332375	0.443695	0.122523	0.0427022	4.63711	2.57367	2.39668
chr1	138566743	138567743	p300_3635:::chr1:::138567243	316.065	275.755	0.872462	-0.196835	0.160483	0.41646	3.10195	6.21693	3.23675	2.98879	0.344894	5.94431	0.256205	5.36562	1.26811	0.227745	9.84845	6.29593	12.4208
chr1	138571308	138572308	p300_3637:::chr1:::138571808	370.787	359.522	0.969617	-0.0445125	0.747682	1	3.60265	6.74437	3.23816	10.1933	0.261003	5.55597	0.191415	6.28396	0.85766	0.498192	22.7633	7.57479	6.03498
chr1	138574198	138575198	DHS_17053:::chr1:::138574698	421.988	536.642	1.2717	0.346756	0.00365362	0.0238605	4.16689	3.40383	2.04414	6.2637	0.281307	5.7546	0.331514	7.13008	0.392073	0.469724	5.3075	2.75447	3.72723
chr1	138629616	138630616	p300_3649:::chr1:::138630116	289.358	356.596	1.23237	0.301434	0.0306059	0.12663	3.58877	4.00103	1.76231	4.65411	0.59051	2.43757	0.691477	4.90128	1.38451	0.298915	10.0056	7.32868	4.83047
chr1	138650588	138651588	DHS_17082:::chr1:::138651088	112.104	111.956	0.998673	-0.00191643	1	1	1.99941	3.18166	2.09861	1.093	0.651837	1.42914	0.446668	1.8986	1.17622	0.256213	1.81575	3.90649	3.03647
chr1	138677941	138678941	p300_3656:::chr1:::138678441	61.7105	56.0969	0.909033	-0.137595	0.677869	0.958707	2.14378	4.76387	2.56459	1.08424	2.43772	2.03682	0.829905	1.04217	0.735137	0.0711703	4.37774	2.3764	9.01584
chr1	138869327	138870327	DHS_17165:::chr1:::138869827	10.3451	18.6111	1.79902	0.847215	0.180109	0.449882	1.83658	0.94083	0.45853	0.97138	0.57799	1.23883	0.859329	0.175414	0	0	2.04032	2.24835	2.24217
chr1	138885935	138886935	DHS_17178:::chr1:::138886435	7.26646	31.5912	4.34754	2.1202	0.000201253	0.00211833	3.22274	1.90182	0.882749	1.57989	0.503606	0.763808	0.596808	0.123822	0	0	1.64974	3.81922	2.02856
chr1	138887291	138888291	DHS_17180:::chr1:::138887791	3.13421	8.91427	2.84418	1.50801	0.145131	0.390681	2.24744	0.545375	0.441374	0.902793	0.551004	0.845645	0.623936	0.0515925	0.00612614	0.0142341	1.74678	1.52769	1.56489
chr1	138900118	138901118	DHS_17183:::chr1:::138900618	20.1078	43.508	2.16374	1.11353	0.00681687	0.0394084	1.70999	0.785054	0.492697	1.07075	0.534057	0.97062	0.707842	0.34051	0.00612614	0	1.61137	3.9258	2.88717
chr1	138901939	138902939	p300_3672:::chr1:::138902439	3.71659	12.4357	3.346	1.74244	0.0474004	0.175529	2.80141	0.876461	0.351843	1.14696	0.396433	0.924181	0.344646	0.061911	0	0.0142341	3.86309	2.91131	1.9145
chr1	138905162	138906162	p300_3673:::chr1:::138905662	28.9836	41.7898	1.44184	0.527912	0.207134	0.491423	2.65687	2.0423	0.795811	0.813882	1.03621	1.72146	0.358688	0.484969	0.0122523	0	2.97453	3.21355	2.56029
chr1	138937217	138938217	p300_3674:::chr1:::138937717	20.7458	30.4429	1.46743	0.55329	0.236084	0.537122	1.70853	1.20548	0.802815	0.883244	1.01038	0.383408	0.660889	0.350829	0.0122523	0	6.00142	3.34006	0.923237
chr1	138948363	138949363	p300_3676:::chr1:::138948863	15.2264	28.6992	1.88482	0.914429	0.0673543	0.226694	1.80332	1.37718	0.968533	1.33721	0.349209	0.753033	0.634169	0.257962	0.0122523	0.0284681	4.34415	2.27956	0.432421
chr1	139070652	139071652	p300_3678:::chr1:::139071152	83.4543	180.029	2.15721	1.10917	8.53475e-08	2.496e-06	5.48057	3.33921	1.02305	2.05072	0.401551	1.11789	0.370565	1.41363	0.116397	0.0711703	9.17737	8.52791	2.92328
chr1	139099805	139100805	p300_3679:::chr1:::139100305	10.4562	30.63	2.92935	1.55058	0.00308428	0.0207953	3.53833	1.7768	1.10783	0.843446	0.719093	0.698382	0.600194	0.175414	0.0122523	0.0142341	2.76052	2.29356	1.75863
chr1	139118056	139119056	DHS_17217:::chr1:::139118556	15.5865	32.6119	2.09231	1.0651	0.0280057	0.118503	1.8491	3.70432	2.83568	0.703375	1.31351	1.46745	0.479069	0.268281	0.0183784	0.0142341	1.66104	2.28281	2.40927
chr1	139274826	139275826	p300_3686:::chr1:::139275326	1.74714	6.41349	3.67084	1.87611	0.183292	0.455078	4.34744	1.53609	0.633768	1.26391	0.954527	0.599296	0.430425	0.0309555	0	0	2.96107	6.21521	2.54663
chr1	139283773	139284773	p300_3687:::chr1:::139284273	1.27592	2.81547	2.20663	1.14184	0.632384	0.933728	2.60839	0.675284	0.41792	0.976935	1.04225	0.470462	0.966897	0.020637	0.0183784	0.0284681	2.34311	3.07383	3.73178
chr1	139314665	139315665	p300_3688:::chr1:::139315165	0.582381	2.39868	4.11874	2.0422	0.522345	0.851584	2.29587	0.457428	0.380712	0.778712	0.494536	0.184617	0.775173	0.0103185	0.00612614	0.0142341	9.30423	5.60032	2.9419
chr1	139532053	139533053	DHS_17257:::chr1:::139532553	0	0	NA	NA	NA	NA	2.72936	0.607027	0.233179	0.457074	1.29481	0.694153	0.676769	0	0	0	2.1789	2.47729	2.16891
chr1	139553358	139554358	DHS_17260:::chr1:::139553858	0	0.808067	Inf	Inf	0.844589	1	2.6948	0.453051	0.291168	0.827166	0.686592	0.441889	0.552116	0	0.00612614	0	1.20923	1.42771	1.80553
chr1	139592038	139593038	p300_3689:::chr1:::139592538	1.16476	4.8484	4.16257	2.05747	0.24327	0.54773	2.99127	1.01218	0.414073	0.58635	0.603289	0.435056	0.565765	0.020637	0	0	4.04782	3.59217	0.782148
chr1	139634439	139635439	p300_3690:::chr1:::139634939	22.9641	51.2485	2.23167	1.15813	0.00268126	0.0185542	3.34307	2.06625	0.669418	1.55356	0.522911	0.919752	1.51546	0.392103	0.0183784	0.0284681	2.69458	3.5349	3.1037
chr1	140102219	140103219	p300_3693:::chr1:::140102719	0	0.808067	Inf	Inf	0.844589	1	2.95559	1.31543	0.411949	0.782421	0.846058	0.587405	1.36301	0	0	0	4.50929	3.60704	1.31374
chr1	140163253	140164253	DHS_17290:::chr1:::140163753	0.637958	0	0	#NAME?	0.903999	1	3.5323	0.560536	0.520357	0.665216	0.771842	0.0683407	0.781561	0.0103185	0	0	1.45872	2.71098	1.37942
chr1	140798332	140799332	DHS_17366:::chr1:::140798832	9.12475	42.8531	4.69636	2.23154	6.1202e-06	0.000105885	2.62733	2.57178	1.0469	1.6974	0.518589	0.965807	1.97426	0.154777	0.0122523	0	1.24071	1.87805	2.73605
chr1	140852726	140853726	DHS_17376:::chr1:::140853226	3.66102	6.90686	1.8866	0.915786	0.443478	0.782927	3.48827	1.61942	0.497657	2.56599	0.482651	0.610021	0.592196	0.061911	0.00612614	0	1.55009	3.55863	2.77736
chr1	141091299	141092299	DHS_17402:::chr1:::141091799	32.0333	133.433	4.16545	2.05847	8.55015e-14	9.57734e-12	2.39398	1.90403	0.775998	2.71888	0.354164	1.0569	1.20119	0.54688	0.0245046	0.0142341	1.50395	1.69112	2.37389
chr1	141395963	141396963	DHS_17446:::chr1:::141396463	20.0522	59.797	2.98206	1.57631	3.05174e-05	0.000425307	6.80401	2.08694	0.633119	3.76842	0.520118	0.798242	0.723255	0.34051	0.00612614	0.0427022	4.07026	6.82973	4.29657
chr1	141967364	141968364	DHS_17489:::chr1:::141967864	0	2.78995	Inf	Inf	0.201155	0.482202	2.50913	0.49647	0.273116	1.13473	0.755687	0.322825	0.963106	0	0	0	2.29688	0.502196	1.60044
chr1	142086218	142087218	DHS_17499:::chr1:::142086718	2.9119	6.38796	2.19374	1.13339	0.466268	0.80553	4.4364	0.790444	0.334709	1.25074	0.446531	0.297567	0.645638	0.0515925	0	0	1.53976	2.65118	1.83923
chr1	142121506	142122506	p300_3724:::chr1:::142122006	67.5899	73.7639	1.09135	0.126107	0.678759	0.959358	2.71567	4.6747	1.7217	2.47234	0.4198	1.90806	0.402497	1.14535	0.0551353	0	16.6611	7.17003	3.63283
chr1	145113731	145114731	p300_3735:::chr1:::145114231	0	0.416796	Inf	Inf	1	1	3.54593	0.607169	0.459268	1.04614	0.924185	0.526408	0.712528	0	0	0	4.83775	3.07086	2.79613
chr1	145161496	145162496	p300_3737:::chr1:::145161996	1.16476	1.61613	1.38752	0.472512	1	1	4.04716	1.04745	0.470501	0.930289	0.873258	0.856861	0.742866	0.020637	0	0	7.97235	4.46028	1.68052
chr1	145402233	145403233	p300_3738:::chr1:::145402733	5.51931	7.29813	1.32229	0.403038	0.74408	1	4.40739	1.76941	0.651819	1.45323	0.910316	0.767031	0.472196	0.0928664	0	0	8.57587	5.49732	5.18012
chr1	145578499	145579499	p300_3743:::chr1:::145578999	40.16	64.2286	1.59932	0.677456	0.0336861	0.136301	5.35343	3.46686	0.990263	4.60801	0.289251	1.47743	0.296607	0.68102	0.00612614	0.0569363	8.43906	9.80838	5.34969
chr1	145580701	145581701	p300_3744:::chr1:::145581201	34.3918	80.6791	2.34588	1.23013	5.64826e-05	0.000720815	5.22933	2.076	0.6322	2.87821	0.414187	1.28562	0.305417	0.577836	0.0122523	0	9.45198	7.2998	4.78018
chr1	145683953	145684953	DHS_17693:::chr1:::145684453	6.26842	13.0057	2.07479	1.05296	0.198107	0.478777	2.32357	1.36223	0.747257	1.38148	0.780472	1.11729	1.89187	0.103185	0	0.0284681	1.07425	3.24131	2.63053
chr1	146960115	146961115	DHS_17746:::chr1:::146960615	1.80272	8.0041	4.44001	2.15056	0.0828485	0.262811	2.60812	0.56093	0.520723	1.33137	0.467392	0.474162	2.17631	0.0309555	0	0.0854044	1.4273	1.19154	1.93739
chr1	147400887	147401887	DHS_17763:::chr1:::147401387	2.49625	7.66388	3.07015	1.61831	0.162104	0.418958	4.39663	0.85676	0.917709	1.06369	0.600338	0.771371	1.10803	0.041274	0	0	3.65883	0.899975	3.82415
chr1	148776323	148777323	DHS_17811:::chr1:::148776823	0	0.416796	Inf	Inf	1	1	4.66289	0.526611	0.391091	0.719949	0.51763	0.123273	0.286042	0	0	0	0.584718	0.191767	1.83341
chr1	149062524	149063524	DHS_17822:::chr1:::149063024	0	3.25779	Inf	Inf	0.146762	0.392936	5.14706	1.19815	0.453144	2.3593	0.479433	0.432825	1.11911	0	0	0	1.84771	3.6359	3.67846
chr1	150669996	150670996	p300_3763:::chr1:::150670496	15.0597	30.2642	2.00962	1.00692	0.0435214	0.165138	5.47789	1.81537	0.693925	1.2335	0.422275	0.659653	0.5294	0.257962	0	0	6.05199	4.05069	5.16362
chr1	150700544	150701544	DHS_17871:::chr1:::150701044	0.637958	0.833592	1.30666	0.385881	1	1	4.19923	0.46548	0.345692	1.17111	0.640953	0.227006	1.12874	0.0103185	0	0	2.26118	0.847529	1.63987
chr1	150921476	150922476	p300_3764:::chr1:::150921976	1.27592	28.0187	21.9597	4.45679	1.56644e-07	4.24784e-06	3.26888	1.19312	0.582947	1.74881	0.514375	0.32666	1.31293	0.020637	0	0	3.48624	4.00178	3.20998
chr1	150944253	150945253	DHS_17878:::chr1:::150944753	9.12475	40.3523	4.42229	2.14479	1.91531e-05	0.000284344	5.6103	1.34368	0.844368	2.41399	0.53426	0.282277	1.08275	0.154777	0.0122523	0.0142341	3.15603	2.25832	3.5985
chr1	151856719	151857719	p300_3765:::chr1:::151857219	3.60544	13.6095	3.77472	1.91637	0.0280762	0.118737	2.1386	1.48976	0.765049	0.857653	1.0945	1.11298	1.64996	0.061911	0	0	3.1895	0.721408	2.23335
chr1	151962502	151963502	p300_3771:::chr1:::151963002	24.8224	59.8736	2.41208	1.27027	0.000462837	0.00428094	3.50477	1.53702	1.10103	1.59712	0.635825	0.755476	0.954761	0.423058	0.0122523	0.0284681	6.21502	2.64429	3.16014
chr1	152343727	152344727	p300_3774:::chr1:::152344227	46.8175	94.2121	2.01233	1.00886	0.000755497	0.00643915	7.15594	2.49614	0.665866	5.76114	0.401148	0.44775	0.742112	0.784205	0.0245046	0	12.5437	13.5824	10.9403
chr1	152350923	152351923	DHS_17983:::chr1:::152351423	3.77217	6.36244	1.68668	0.754185	0.589722	0.906044	2.99388	0.812141	0.325223	1.14901	0.796131	0.434896	0.71051	0.061911	0	0	1.54713	1.30475	2.64005
chr1	152885416	152886416	p300_3779:::chr1:::152885916	0.637958	5.18863	8.13318	3.02382	0.101536	0.304987	1.91799	0.858401	0.978613	1.00083	1.11659	0.763808	0.759574	0.0103185	0	0	3.03075	2.3307	2.74636
chr1	152902189	152903189	p300_3780:::chr1:::152902689	0	3.96376	Inf	Inf	0.120277	0.342906	2.83965	1.11361	0.657866	1.00921	0.739899	0.715889	0.638273	0	0	0	1.93202	2.07371	0.891643
chr1	152925707	152926707	p300_3781:::chr1:::152926207	0	3.18122	Inf	Inf	0.150518	0.398523	2.21583	1.31408	0.570041	1.18929	1.23318	1.24577	0.476485	0	0	0	3.49429	2.79513	5.65004
chr1	152927587	152928587	DHS_18043:::chr1:::152928087	0	0.782542	Inf	Inf	0.849188	1	3.98955	1.32166	0.223077	1.30041	1.07921	1.17191	0.792479	0	0.00612614	0	1.83437	2.51581	3.28671
chr1	152933212	152934212	p300_3782:::chr1:::152933712	2.44068	13.3459	5.4681	2.45104	0.0102112	0.0543986	3.91547	2.62388	1.48712	1.99289	0.795739	1.07757	2.25036	0.041274	0.0122523	0	3.92926	2.38873	3.31978
chr1	152957301	152958301	p300_3783:::chr1:::152957801	0	2.05846	Inf	Inf	0.353015	0.687922	2.89532	0.804766	0.455846	0.841744	0.710827	0.532161	0.679154	0	0.00612614	0	2.36643	2.60771	1.86561
chr1	152960310	152961310	p300_3784:::chr1:::152960810	0	3.64907	Inf	Inf	0.109749	0.321435	3.16749	1.10939	0.561749	2.27066	0.518867	0.674532	1.11799	0	0.00612614	0	3.09951	0.655826	1.85118
chr1	153024250	153025250	p300_3787:::chr1:::153024750	59.2142	66.1594	1.11729	0.160003	0.587563	0.905058	5.06397	7.00918	3.23155	5.30351	0.677644	2.93648	0.60077	1.00089	0.0367568	0	10.8545	8.02981	9.06618
chr1	153066892	153067892	DHS_18065:::chr1:::153067392	1.91387	9.67128	5.05325	2.33721	0.0349308	0.139737	3.86378	1.33684	0.491237	0.780028	0.613599	1.00509	0.657344	0.0309555	0	0	1.93275	4.43711	3.40527
chr1	153081054	153082054	DHS_18069:::chr1:::153081554	0	0.391271	Inf	Inf	1	1	4.0249	0.818839	0.514937	1.02818	0.565158	0.747138	1.22979	0	0	0	1.00818	0.961878	1.47795
chr1	153082348	153083348	p300_3790:::chr1:::153082848	4.35455	5.60542	1.28726	0.364299	0.801857	1	4.47271	1.44978	0.608562	1.35248	0.865287	0.836139	0.652159	0.0722294	0.00612614	0	2.18716	3.44309	2.6648
chr1	153092016	153093016	p300_3791:::chr1:::153092516	1.16476	8.47194	7.27354	2.86266	0.0340156	0.137073	2.43099	2.84232	0.879527	1.41844	0.972658	1.77711	1.0525	0.020637	0.00612614	0	2.61309	2.10104	4.07786
chr1	153097535	153098535	p300_3792:::chr1:::153098035	13.6726	57.2452	4.18684	2.06586	8.90628e-07	1.96883e-05	2.47635	3.1022	1.69738	1.25806	1.53631	1.9437	0.949858	0.237325	0.0122523	0	2.35241	2.71196	5.53473
chr1	153101419	153102419	DHS_18079:::chr1:::153101919	0	7.24708	Inf	Inf	0.0077992	0.0438815	1.66506	0.997335	0.582555	0.776645	0.930569	0.677655	0.818822	0	0.0122523	0	1.78861	1.02017	1.16113
chr1	153105867	153106867	p300_3794:::chr1:::153106367	4.35455	12.1721	2.79525	1.48298	0.0848334	0.266889	3.88164	2.8776	0.893613	1.07918	1.22787	1.19859	0.529754	0.0722294	0	0	3.12689	3.07653	2.24952
chr1	153117468	153118468	p300_3795:::chr1:::153117968	1.27592	2.39868	1.87997	0.910706	0.756338	1	2.03741	1.06252	0.696252	0.979085	0.787801	0.883938	0.969972	0.020637	0	0	3.68674	2.41824	2.13714
chr1	153136663	153137663	DHS_18088:::chr1:::153137163	11.2875	77.9402	6.90497	2.78764	3.07805e-12	2.55103e-10	2.39224	3.96917	1.92243	1.43945	0.757274	1.77939	0.876792	0.196051	0.0122523	0	2.48072	4.7132	4.85353
chr1	153140480	153141480	p300_3796:::chr1:::153140980	0.582381	5.29073	9.08465	3.18343	0.100434	0.302883	5.17893	2.43983	0.766598	1.65116	0.535413	0.903074	0.477351	0.0103185	0	0	6.68579	2.73376	2.85219
chr1	153157391	153158391	p300_3799:::chr1:::153157891	4.13224	18.5855	4.49769	2.16918	0.00498594	0.0306233	2.8448	1.15035	0.663543	0.986104	0.529969	0.697167	0.339429	0.0722294	0.0183784	0	2.17013	3.96533	2.59221
chr1	153175511	153176511	DHS_18102:::chr1:::153176011	1.8583	2.81547	1.51508	0.599397	0.847629	1	1.98037	0.992176	0.44304	0.596184	0.888627	0.710486	0.544122	0.0309555	0.0673875	0	1.83028	2.05806	1.71777
chr1	153185043	153186043	DHS_18105:::chr1:::153185543	25.0447	13.3203	0.531862	-0.910875	0.0833731	0.263845	2.37465	0.665637	0.605808	0.731085	1.25526	0.789268	0.742694	0.423058	0.0980183	0.0427022	0.815166	0.950562	1.136
chr1	153362543	153363543	p300_3808:::chr1:::153363043	80.7357	118.42	1.46676	0.552636	0.0186009	0.0868083	3.94013	2.64431	0.782986	3.11649	0.400815	1.20064	0.309552	1.37236	0	0.0854044	8.22611	10.6877	4.86578
chr1	153364765	153365765	p300_3810:::chr1:::153365265	87.0597	162.677	1.86857	0.901931	2.05055e-05	0.000301573	1.92512	3.19352	1.30371	2.27394	0.464598	1.48236	0.957882	1.47554	0.0796398	0.0427022	3.47113	6.21746	5.18281
chr1	153407389	153408389	p300_3815:::chr1:::153407889	19.9411	29.5072	1.47972	0.565325	0.242473	0.546837	1.67056	3.45313	1.79261	1.04607	1.00584	1.94993	0.521505	0.34051	0.0183784	0.0142341	3.70488	4.65345	3.57803
chr1	153411208	153412208	p300_3816:::chr1:::153411708	7.79326	11.7042	1.50184	0.586729	0.496108	0.829812	1.62197	1.03411	0.662062	0.801229	0.785625	1.18254	0.192154	0.13414	0.0183784	0	3.05202	4.43666	3.44856
chr1	153415556	153416556	p300_3817:::chr1:::153416056	272.856	191.333	0.701225	-0.51205	0.00117173	0.00931569	1.85069	2.31831	1.35324	1.31727	0.699468	1.50746	0.590557	4.62268	0.110271	0.0427022	4.3877	3.99725	2.51135
chr1	153584039	153585039	p300_3828:::chr1:::153584539	1.22034	6.83029	5.59704	2.48466	0.0834413	0.26391	2.97593	0.780234	0.430057	0.94909	0.583666	0.975045	0.945989	0.020637	0	0	3.46869	4.43944	1.66744
chr1	153725214	153726214	p300_3834:::chr1:::153725714	138.396	64.3052	0.464646	-1.1058	1.10064e-06	2.37476e-05	2.65986	2.71668	1.82399	1.10402	1.12553	1.6622	0.525067	2.35262	0.0367568	0.0569363	7.79155	5.47575	1.99435
chr1	153727485	153728485	p300_3835:::chr1:::153727985	133.71	101.536	0.75937	-0.397125	0.0664733	0.224701	2.82375	3.01778	1.72891	1.63719	0.741579	1.41285	0.55197	2.25975	0.0367568	0.0284681	3.17126	4.63122	2.3586
chr1	153957672	153958672	p300_3846:::chr1:::153958172	5.57489	7.14498	1.28164	0.357987	0.785444	1	2.08675	1.96438	0.696907	1.08098	0.885286	0.903074	0.703891	0.0928664	0	0	3.12582	2.16423	2.33361
chr1	154534137	154535137	p300_3860:::chr1:::154534637	38.9953	43.7461	1.12183	0.165857	0.649946	0.938844	2.10809	3.74421	1.3822	1.5591	0.728241	1.28139	0.509714	0.660383	0.0245046	0	2.88705	1.29569	5.35434
chr1	154565037	154566037	p300_3861:::chr1:::154565537	15.0041	11.2108	0.747183	-0.420466	0.546038	0.867015	1.56865	1.19665	0.439721	1.31361	0.744658	1.02127	0.435261	0.257962	0.0735137	0.0142341	2.33559	1.92916	1.54991
chr1	154625874	154626874	p300_3867:::chr1:::154626374	55.0264	135.024	2.4538	1.29502	9.8769e-08	2.83618e-06	2.07584	2.91634	0.950652	1.91277	0.47632	1.86737	0.309503	0.928664	0.0183784	0	4.2485	4.86408	5.62842
chr1	154637076	154638076	p300_3868:::chr1:::154637576	61.8482	85.9188	1.38919	0.474241	0.0803162	0.258244	2.50024	4.34471	1.6916	2.90957	0.411544	1.76263	0.199632	1.05249	0.0183784	0.0569363	4.65063	5.41546	5.11823
chr1	154639600	154640600	p300_3869:::chr1:::154640100	161.972	256.242	1.58202	0.661768	7.3333e-05	0.000899115	3.48818	4.83769	1.67143	5.68069	0.435358	3.15749	0.246965	2.74472	0.042883	0.0284681	6.94153	6.20884	4.1835
chr1	154641230	154642230	p300_3871:::chr1:::154641730	126.497	227.05	1.7949	0.843903	3.57544e-06	6.63231e-05	3.24728	2.58859	0.958354	5.77098	0.280714	3.06584	0.383596	2.15656	0.0367568	0.0284681	5.66717	2.87561	2.39483
chr1	154643458	154644458	DHS_18402:::chr1:::154643958	126.362	196.258	1.55315	0.635193	0.000754581	0.00643274	2.94986	3.98223	1.64472	2.31874	0.329724	3.84374	0.305152	2.12561	0.0122523	0.0569363	3.33231	4.52226	3.9118
chr1	154646762	154647762	p300_3872:::chr1:::154647262	69.8082	132.761	1.9018	0.927364	7.12391e-05	0.000876861	2.4205	2.57055	0.887533	1.66124	0.596138	2.09375	0.40243	1.18663	0.0612614	0.0142341	2.94181	2.95602	2.35511
chr1	154751358	154752358	p300_3881:::chr1:::154751858	210.036	146.787	0.698868	-0.516908	0.00339278	0.022465	3.92477	5.24057	4.59029	2.12658	0.452126	2.86489	0.218629	3.55988	0.208289	0.256213	4.98588	4.42464	5.82424
chr1	154756367	154757367	p300_3882:::chr1:::154756867	36.3057	27.0575	0.745269	-0.424166	0.321913	0.65031	1.91142	0.516877	0.397906	0.945539	0.54481	0.663992	0.440207	0.608791	0.0551353	0	2.36213	2.41016	1.93328
chr1	154762623	154763623	p300_3883:::chr1:::154763123	183.856	250.297	1.36138	0.445067	0.00601541	0.0356398	3.35574	4.22836	1.21132	7.84847	0.290417	3.6731	0.20293	3.10587	0.0673875	0.0996385	22.0648	9.47319	7.32498
chr1	154764420	154765420	p300_3885:::chr1:::154764920	106.585	132.812	1.24607	0.317382	0.136896	0.374346	4.08561	2.81067	0.99398	5.90446	0.234386	2.78493	0.415424	1.80574	0.0306307	0	14.6133	7.63571	5.43634
chr1	154780742	154781742	p300_3886:::chr1:::154781242	37.3593	83.4691	2.23423	1.15978	9.87589e-05	0.0011609	2.5021	2.51688	1.19819	0.980318	0.972615	1.74449	0.369617	0.629428	0.0367568	0	3.19894	2.93759	2.44552
chr1	154789821	154790821	p300_3887:::chr1:::154790321	13.895	25.8582	1.86097	0.896058	0.0935926	0.287438	3.56198	2.33998	0.761587	2.67298	1.4101	0.818366	0.717375	0.237325	0.00612614	0.0142341	13.7155	10.1846	4.75264
chr1	155038079	155039079	p300_3925:::chr1:::155038579	27.4854	79.4203	2.88954	1.53084	2.60371e-06	5.02574e-05	3.88932	3.30187	1.39216	1.54866	0.841599	1.97594	0.314738	0.464332	0	0	4.83837	2.99399	3.65302
chr1	155044550	155045550	DHS_18573:::chr1:::155045050	1.22034	2.81547	2.30712	1.2061	0.635814	0.933728	2.4632	0.767175	0.712184	1.43529	1.15198	1.16643	0.671171	0.020637	0	0	0.782928	1.33522	1.82365
chr1	155046309	155047309	p300_3926:::chr1:::155046809	43.4054	51.6142	1.18912	0.249894	0.45282	0.790437	3.55179	1.98548	0.79561	1.20695	0.88358	1.44894	0.508012	0.732613	0.0306307	0	3.46941	7.2822	2.1905
chr1	155049028	155050028	p300_3927:::chr1:::155049528	16.3912	41.3475	2.52254	1.33488	0.00225758	0.016113	1.92573	1.29364	0.829721	1.59664	1.24567	1.51412	0.722445	0.278599	0.00612614	0	3.18289	2.35541	2.63212
chr1	155062433	155063433	p300_3929:::chr1:::155062933	87.3932	123.311	1.41099	0.496712	0.090344	0.280189	2.37377	1.57547	0.603299	1.14051	0.413017	0.768328	0.356565	1.47554	0.0122523	0.142341	3.82662	2.3307	3.02004
chr1	155192880	155193880	p300_3946:::chr1:::155193380	106.805	101.978	0.954805	-0.0667218	0.811311	1	3.72845	5.412	3.17213	1.23766	0.652745	3.69892	0.568365	1.82637	0.0245046	0.0142341	3.01555	3.32661	8.35022
chr1	155194555	155195555	p300_3947:::chr1:::155195055	56.5512	85.9188	1.51931	0.603415	0.0271587	0.115726	3.93845	1.6438	0.584014	2.77444	0.343926	0.791752	0.938274	0.95962	0.0245046	0.0142341	3.52079	6.09678	5.13079
chr1	155200514	155201514	DHS_18644:::chr1:::155201014	21.9105	81.6148	3.72491	1.89721	2.34649e-08	7.96082e-07	2.90967	1.81171	0.921903	1.17217	0.932483	1.51838	0.407862	0.371466	0	0	1.02444	2.32131	2.33612
chr1	155207412	155208412	DHS_18646:::chr1:::155207912	1.74714	10.0626	5.75943	2.52593	0.0291602	0.121957	2.7039	0.78377	0.48506	1.18626	0.457199	0.686906	0.705133	0.0309555	0.00612614	0	1.57654	2.48184	2.44812
chr1	155220937	155221937	p300_3950:::chr1:::155221437	22.9641	114.541	4.98784	2.31841	4.73855e-14	5.58299e-12	4.45337	1.26311	0.539753	1.95107	0.314299	1.54487	0.388938	0.392103	0.00612614	0.0142341	3.6175	1.82525	2.45139
chr1	155223286	155224286	p300_3951:::chr1:::155223786	179.861	218	1.21204	0.277442	0.100595	0.303276	6.76823	4.19985	1.44673	9.36648	0.35812	2.47328	0.204964	3.04396	0.0490091	0.0711703	24.1962	11.0616	8.21086
chr1	155225377	155226377	DHS_18652:::chr1:::155225877	120.342	189.411	1.57393	0.654375	0.000502349	0.00458746	3.51529	1.64539	0.815799	2.36983	0.332719	2.06078	0.453397	2.03274	0.0122523	0.185043	3.11412	3.48951	2.51861
chr1	155231911	155232911	p300_3952:::chr1:::155232411	31.3953	72.8792	2.32134	1.21496	0.000210411	0.00220108	4.11564	2.73808	0.964137	1.54627	0.530036	1.86483	0.503689	0.536562	0.0122523	0.0854044	3.11228	3.33076	3.66868
chr1	155335857	155336857	DHS_18705:::chr1:::155336357	132.268	163.646	1.23724	0.30712	0.112624	0.326707	5.08739	3.13774	0.926044	2.35046	0.249745	4.228	0.25802	2.23911	0.0490091	0.0427022	2.64318	3.38492	2.66864
chr1	155340175	155341175	p300_3963:::chr1:::155340675	226.843	321.806	1.41863	0.504499	0.000715285	0.00616743	4.12866	5.79191	1.6371	9.94714	0.282019	3.00167	0.206828	3.8488	0.0980183	0.0284681	11.6982	8.9717	5.58936
chr1	155406071	155407071	p300_3971:::chr1:::155406571	4.29897	10.9472	2.54647	1.3485	0.138165	0.376889	1.59352	1.47347	0.669577	1.15435	1.36644	1.36681	0.359798	0.0722294	0.0122523	0.0142341	3.50378	1.40708	2.34886
chr1	155407719	155408719	p300_3972:::chr1:::155408219	15.1709	15.719	1.03613	0.0512081	1	1	3.89684	1.55157	0.747666	1.7092	1.56566	1.22454	0.436552	0.257962	0	0	5.75354	3.12696	2.79812
chr1	155434927	155435927	DHS_18744:::chr1:::155435427	7.79326	25.7816	3.30819	1.72604	0.00407814	0.0260714	1.51052	1.11669	0.63012	1.68383	0.570533	0.704764	1.21765	0.13414	0	0	1.44352	2.39204	2.17804
chr1	155437195	155438195	p300_3974:::chr1:::155437695	6.73965	21.7923	3.23345	1.69307	0.00867791	0.0477084	3.33643	1.6422	0.772405	3.89775	0.431378	0.768833	0.608825	0.113503	0	0	6.45787	4.78408	6.08036
chr1	155440473	155441473	DHS_18747:::chr1:::155440973	2.44068	13.3459	5.4681	2.45104	0.0102112	0.0543986	2.05662	1.02083	0.57119	1.60644	0.52138	0.681972	0.56968	0.041274	0	0	2.42609	1.7823	1.91265
chr1	155445626	155446626	DHS_18748:::chr1:::155446126	10.4562	14.1539	1.35364	0.436839	0.53884	0.860089	2.43025	1.23555	0.702656	1.5429	0.528197	0.825117	0.439062	0.175414	0.00612614	0	1.00419	3.44539	1.43017
chr1	155488213	155489213	p300_3976:::chr1:::155488713	199.524	182.81	0.916231	-0.126216	0.465235	0.804505	2.61554	6.67379	3.44549	1.74532	0.908073	3.45013	0.371833	3.38447	0.281802	0.113873	7.37633	5.94879	5.23603
chr1	155551835	155552835	p300_3983:::chr1:::155552335	5.40816	4.45713	0.82415	-0.279022	0.869762	1	2.16263	1.57107	0.537325	1.02055	1.02035	0.665367	0.868871	0.0928664	0	0	13.3414	7.90413	4.02689
chr1	155883647	155884647	p300_3994:::chr1:::155884147	2.49625	4.79735	1.92182	0.942474	0.524082	0.853038	3.84374	1.31307	1.08619	1.69097	0.782163	0.659381	0.882708	0.041274	0.00612614	0	3.60881	1.53863	4.14905
chr1	155912774	155913774	p300_3995:::chr1:::155913274	3.66102	5.682	1.55203	0.634154	0.658019	0.945726	1.8923	1.29701	0.545227	1.85869	1.05239	0.548987	0.917818	0.061911	0	0	2.63231	1.33673	2.58642
chr1	155926227	155927227	p300_3996:::chr1:::155926727	128.967	85.1279	0.660075	-0.599297	0.0061607	0.0362929	4.36789	3.54291	1.02987	2.87098	0.329781	2.79242	0.40497	2.18752	0.042883	0	4.47027	4.56116	3.15191
chr1	155927502	155928502	p300_3997:::chr1:::155928002	287.333	236.109	0.821725	-0.283272	0.0577917	0.203543	3.85212	4.86571	1.27066	7.25413	0.325712	2.24947	0.36374	4.87033	0.116397	0.185043	17.306	13.5706	6.68341
chr1	155937595	155938595	DHS_18836:::chr1:::155938095	20.2745	33.607	1.6576	0.729093	0.20577	0.48941	4.26695	1.73751	0.522509	3.02037	0.668759	1.24119	0.791223	0.34051	0	0.0996385	1.69826	1.55952	3.70213
chr1	155943157	155944157	p300_3998:::chr1:::155943657	112.104	183.695	1.63861	0.712469	0.000241917	0.002481	2.79307	1.86673	0.889263	1.37584	0.359028	1.36555	0.405013	1.8986	0.0183784	0.142341	3.66474	3.13054	7.22798
chr1	155947362	155948362	p300_3999:::chr1:::155947862	17.5004	27.8911	1.59374	0.672417	0.181813	0.452552	4.37902	1.5682	0.544611	2.24933	0.597499	0.726265	0.802487	0.299236	0.0245046	0.0284681	6.18513	4.62191	2.29125
chr1	155949705	155950705	p300_4000:::chr1:::155950205	14.4773	25.4924	1.76085	0.816272	0.128438	0.358655	1.87872	1.4132	1.04572	0.991683	0.568377	1.13866	0.768143	0.247644	0.0245046	0.0427022	2.84263	2.79685	1.95242
chr1	155964890	155965890	p300_4002:::chr1:::155965390	46.9553	49.3176	1.05031	0.070817	0.862433	1	2.25926	5.56779	3.0979	1.30457	0.752304	3.55079	0.346186	0.794524	0.0183784	0.0569363	6.81126	2.92432	5.25143
chr1	156804308	156805308	DHS_18905:::chr1:::156804808	0.582381	2.39868	4.11874	2.0422	0.522345	0.851584	1.70763	0.746627	0.493399	0.672804	1.06696	0.666517	1.04742	0.0103185	0	0	0.966008	2.18891	1.25879
chr1	156846695	156847695	p300_4016:::chr1:::156847195	2.44068	4.04034	1.65542	0.727194	0.703321	0.979861	2.08224	1.01454	0.505365	1.1394	0.775815	0.55511	2.11212	0.041274	0	0.0142341	7.04053	6.64554	2.10247
chr1	156848646	156849646	p300_4017:::chr1:::156849146	0.637958	4.79735	7.51986	2.91071	0.129204	0.359837	1.99443	0.871667	0.500224	0.902793	1.38324	0.556489	1.56798	0.0103185	0	0.0142341	6.48898	5.4827	1.64217
chr1	156877707	156878707	p300_4019:::chr1:::156878207	22.3817	45.6941	2.04158	1.02968	0.0104728	0.0553389	1.73846	1.67424	0.904279	1.06931	1.4144	1.92	0.885783	0.381784	0.0183784	0	4.08411	2.40176	2.90184
chr1	156882055	156883055	DHS_18924:::chr1:::156882555	0	10.5559	Inf	Inf	0.000717054	0.00617817	2.87755	0.92144	0.536215	1.0315	0.571031	0.965807	0.417975	0	0	0	1.90879	3.25528	2.67905
chr1	156897055	156898055	p300_4021:::chr1:::156897555	32.7268	65.3258	1.99609	0.997179	0.00268892	0.018597	1.63169	1.43491	0.647525	1.32446	1.06391	1.74944	0.579914	0.557199	0.0122523	0.0142341	5.80867	2.54005	3.79961
chr1	156899739	156900739	DHS_18931:::chr1:::156900239	20.3301	64.2286	3.15928	1.6596	5.61857e-06	9.82603e-05	3.42724	3.55536	1.24428	4.51859	1.12615	1.79482	0.697788	0.34051	0.0183784	0.0284681	4.17784	4.34322	3.62511
chr1	156902964	156903964	p300_4022:::chr1:::156903464	23.6577	72.5135	3.06512	1.61594	3.17522e-06	5.97452e-05	2.17435	1.23567	0.703328	2.80869	0.638174	1.09086	1.39976	0.402421	0.0122523	0	7.82397	4.18769	3.96257
chr1	156906332	156907332	p300_4023:::chr1:::156906832	24.5179	53.5111	2.18253	1.126	0.00241816	0.0170335	1.76477	3.77376	1.65455	1.40722	0.909243	2.39473	0.499811	0.41274	0.042883	0	5.86875	4.71872	3.46741
chr1	156918260	156919260	p300_4024:::chr1:::156918760	4.41013	8.49747	1.92681	0.946213	0.332645	0.661975	2.2937	1.41196	0.819218	1.34051	1.78399	1.08206	0.725527	0.0722294	0	0	5.51163	3.21355	1.88103
chr1	156920735	156921735	p300_4026:::chr1:::156921235	32.0333	41.6877	1.30139	0.380048	0.403595	0.740721	2.20694	1.51853	0.934921	1.24001	1.76679	0.936252	0.66141	0.54688	0.00612614	0	6.33376	1.57584	1.76097
chr1	156933265	156934265	p300_4030:::chr1:::156933765	26.514	45.0986	1.70094	0.766329	0.0504015	0.183801	3.26977	4.64494	1.6555	3.10071	3.60212	1.67871	0.435789	0.454014	0.0183784	0	10.0012	5.28583	5.02781
chr1	156938821	156939821	p300_4031:::chr1:::156939321	17.8339	26.7683	1.50098	0.585908	0.233187	0.532252	2.26041	2.23629	1.07211	1.25594	2.74457	1.24932	0.726427	0.299236	0.00612614	0	2.25864	2.58069	2.95902
chr1	156956804	156957804	p300_4033:::chr1:::156957304	7.54434	15.3022	2.02831	1.02028	0.164787	0.422877	3.77482	2.06399	1.07777	1.07775	2.36109	1.61051	1.15948	0.123822	0.00612614	0	3.75987	3.28828	4.54461
chr1	156958230	156959230	p300_4034:::chr1:::156958730	4.29897	8.523	1.98256	0.987368	0.33474	0.664069	4.35489	1.6413	0.529045	1.50414	1.36181	0.933834	0.75914	0.0722294	0.00612614	0	10.8363	6.22585	4.25165
chr1	157081046	157082046	p300_4040:::chr1:::157081546	7.21088	15.2767	2.11856	1.08309	0.139946	0.380482	2.03955	2.38887	1.61478	0.605532	1.45923	2.08118	0.502413	0.123822	0.0306307	0	3.94328	2.95602	1.87448
chr1	157094774	157095774	p300_4043:::chr1:::157095274	17.6671	32.1695	1.82087	0.864628	0.0619137	0.213562	2.86502	3.29161	1.62969	1.14585	2.10223	1.85496	0.662192	0.299236	0.0122523	0	6.42976	3.21859	3.58751
chr1	157285478	157286478	p300_4049:::chr1:::157285978	17.5004	44.3671	2.53521	1.3421	0.0016559	0.0124424	4.02279	2.57178	0.993864	1.8119	0.433876	1.61174	0.41387	0.299236	0	0.0142341	3.79556	4.02576	3.18329
chr1	157331035	157332035	DHS_19015:::chr1:::157331535	1.22034	9.15239	7.49987	2.90687	0.0624249	0.214765	1.88626	1.20155	0.533034	0.868181	0.599179	0.684499	0.701332	0.020637	0	0	1.62339	1.64564	1.63063
chr1	157336979	157337979	p300_4050:::chr1:::157337479	1.8583	7.22156	3.88612	1.95833	0.122164	0.346806	3.18012	1.09206	0.321835	0.806401	1.13102	1.14969	0.414733	0.0309555	0	0	2.76675	2.84055	1.72428
chr1	157338365	157339365	DHS_19018:::chr1:::157338865	13.4237	44.3416	3.30323	1.72388	0.00011647	0.0013362	2.34656	2.87621	1.11887	0.93623	1.02711	1.76336	0.566815	0.227007	0	0	2.56626	2.61845	2.44096
chr1	157674765	157675765	p300_4064:::chr1:::157675265	2.44068	4.8484	1.9865	0.990228	0.524268	0.853038	1.51073	1.9928	0.839156	1.24831	0.765979	0.801527	0.631024	0.041274	0	0	4.13454	2.24438	2.63964
chr1	157918968	157919968	p300_4074:::chr1:::157919468	78.1573	59.6694	0.763453	-0.38939	0.163412	0.420761	2.21843	1.94745	0.937408	3.28695	0.602456	1.54772	0.439753	1.32077	0.0490091	0.0142341	13.0856	8.6301	3.37382
chr1	158147210	158148210	p300_4084:::chr1:::158147710	71.362	85.3999	1.19671	0.259078	0.315556	0.641644	3.57006	2.15087	0.96682	2.37521	0.84414	1.52372	0.666134	1.20726	0.0122523	0.0284681	5.97049	3.09175	3.00283
chr1	158323372	158324372	DHS_19193:::chr1:::158323872	4.41013	7.66388	1.73779	0.797254	0.436359	0.776575	4.04461	1.86734	0.96698	1.80903	0.635082	1.239	0.550353	0.0722294	0.0245046	0.0142341	1.49862	2.31291	3.31694
chr1	158405865	158406865	p300_4102:::chr1:::158406365	7.21088	22.4727	3.1165	1.63993	0.00990486	0.0531208	2.79067	1.19764	0.772405	1.35248	1.08428	0.762362	0.374992	0.123822	0.00612614	0	3.76191	1.26246	3.39631
chr1	158442342	158443342	p300_4104:::chr1:::158442842	6.57292	7.34918	1.1181	0.161049	0.995142	1	2.18323	0.760728	0.479206	0.876999	0.679149	0.821484	0.790577	0.113503	0	0	6.50469	3.09175	1.12606
chr1	158474168	158475168	DHS_19236:::chr1:::158474668	4.88136	15.668	3.20976	1.68247	0.0293563	0.122587	2.10256	2.13559	1.31309	0.934767	1.17508	1.94771	0.403524	0.0825479	0	0	1.34729	1.00997	1.4369
chr1	158483275	158484275	DHS_19237:::chr1:::158483775	5.46374	25.0246	4.58012	2.19539	0.000731136	0.00627542	2.07376	0.911831	0.366804	1.06769	0.585931	1.06724	0.481526	0.0928664	0	0	0.949166	1.10682	1.95261
chr1	158682188	158683188	p300_4127:::chr1:::158682688	35.4454	52.3202	1.47608	0.561769	0.100208	0.302496	1.77379	4.26613	3.50157	0.737281	0.982795	2.73466	0.299993	0.598473	0.0183784	0	3.07952	3.48899	4.59808
chr1	158710321	158711321	DHS_19319:::chr1:::158710821	4.2434	9.20344	2.16888	1.11695	0.256188	0.567122	1.80806	1.89717	0.946008	0.782225	1.38713	1.43805	0.581845	0.0722294	0.00612614	0	0.90279	0.986943	1.34797
chr1	158719617	158720617	DHS_19323:::chr1:::158720117	4.29897	7.6894	1.78866	0.838879	0.438751	0.778732	2.10426	0.70067	0.450309	0.921068	0.667941	1.13025	0.392088	0.0722294	0.0122523	0	2.15067	2.20804	1.22864
chr1	158880390	158881390	DHS_19349:::chr1:::158880890	38.0528	26.9809	0.709039	-0.496063	0.232738	0.531503	2.58335	1.94239	0.927941	1.27254	0.418698	1.83914	0.27177	0.639747	0.0122523	0.0142341	1.41889	2.0682	0.70619
chr1	158886255	158887255	p300_4135:::chr1:::158886755	189.208	138.588	0.732463	-0.449172	0.0138487	0.0689004	2.65858	4.88588	2.1651	3.67698	0.324575	2.12538	0.324745	3.19873	0.0612614	0	7.14747	9.0665	5.32719
chr1	158891757	158892757	p300_4137:::chr1:::158892257	25.8494	29.167	1.12834	0.174205	0.705469	0.98131	4.31414	2.50641	0.724726	2.68191	0.40475	1.44275	0.405184	0.433377	0	0	8.34036	3.92767	3.49114
chr1	158909570	158910570	DHS_19359:::chr1:::158910070	0.637958	0.808067	1.26665	0.341015	1	1	2.11902	0.829085	0.461794	0.820867	0.933374	0.670031	0.689293	0.0103185	0	0	1.97264	1.72522	1.37452
chr1	158913265	158914265	p300_4139:::chr1:::158913765	150.795	49.4026	0.327614	-1.60993	9.00667e-12	6.8121e-10	2.52307	3.70282	1.90877	1.72878	1.09633	1.85253	0.445073	2.54867	0.0306307	0.0427022	18.8036	15.7048	4.73049
chr1	158919355	158920355	DHS_19362:::chr1:::158919855	3.66102	10.4794	2.86242	1.51723	0.112397	0.326394	1.69904	0.750803	0.395305	0.904313	0.674188	0.874393	0.847807	0.061911	0.0183784	0	2.17744	2.75447	1.0218
chr1	158923782	158924782	p300_4140:::chr1:::158924282	146.745	149.96	1.02191	0.0312679	0.8982	1	3.57817	4.08027	1.605	1.83021	0.443173	2.31027	0.279497	2.48676	0.122523	0.0142341	5.03921	3.14796	2.29307
chr1	158927740	158928740	p300_4143:::chr1:::158928240	24.878	47.1571	1.89553	0.922604	0.0169688	0.0808296	4.26628	2.15828	0.730274	1.36924	0.418756	1.31815	0.32608	0.423058	0.0245046	0	10.6383	6.24346	3.76207
chr1	158968747	158969747	p300_4144:::chr1:::158969247	31.2842	151.576	4.84514	2.27654	2.33254e-17	4.64124e-15	2.26594	1.38851	0.787164	1.17737	0.579307	1.75749	0.747075	0.536562	0.0245046	0.0142341	3.4571	1.92988	1.66937
chr1	158978199	158979199	p300_4145:::chr1:::158978699	19.4143	59.2015	3.04938	1.60852	2.45098e-05	0.000351609	2.33564	1.3598	0.759164	0.893765	0.729221	1.87351	0.719425	0.330192	0.0122523	0	5.0812	4.24188	1.97061
chr1	159006874	159007874	p300_4149:::chr1:::159007374	87.5865	89.0661	1.01689	0.0241676	0.967316	1	2.15539	5.48565	2.74805	0.778035	0.474756	2.25112	0.270368	1.48586	0.042883	0.0142341	4.58446	3.80643	5.02554
chr1	159009152	159010152	p300_4150:::chr1:::159009652	181.775	203.59	1.12001	0.163516	0.334074	0.663451	2.36296	5.5494	2.4744	2.62047	0.416549	2.82709	0.24959	3.07491	0.0796398	0.0854044	4.90229	4.24321	4.6182
chr1	159011416	159012416	p300_4151:::chr1:::159011916	136.456	167.015	1.22395	0.291543	0.126357	0.354895	2.49064	5.142	2.90694	1.852	0.442241	2.57024	0.254493	2.31134	0.0612614	0.0284681	5.16551	3.34926	3.19147
chr1	159014529	159015529	DHS_19383:::chr1:::159015029	4.2434	10.1391	2.38939	1.25664	0.188754	0.464987	2.26322	1.44848	0.800633	0.955281	0.763607	1.59613	0.357496	0.0722294	0.00612614	0	1.99504	1.50992	0.962389
chr1	159015932	159016932	p300_4152:::chr1:::159016432	29.1214	55.8587	1.91813	0.939704	0.00861953	0.0474345	2.3156	4.68771	2.44219	0.989001	0.546085	2.7726	0.291136	0.495288	0.0183784	0	3.3695	4.66141	2.81739
chr1	159355803	159356803	p300_4156:::chr1:::159356303	3.07864	17.6754	5.7413	2.52138	0.00203272	0.0147481	2.2503	2.36871	0.779364	0.896693	1.58795	1.19904	0.853095	0.0515925	0	0.0142341	3.12113	3.68503	3.47963
chr1	159364163	159365163	DHS_19424:::chr1:::159364663	0	2.841	Inf	Inf	0.197834	0.478357	1.91222	0.724026	0.238497	0.798259	0.761947	0.387264	0.906158	0	0	0	0.972479	1.27575	1.11322
chr1	159369723	159370723	p300_4157:::chr1:::159370223	54.6929	63.8884	1.16813	0.224199	0.476187	0.811819	3.28957	5.28718	2.73764	1.75988	0.731822	2.34218	0.449495	0.928664	0.0245046	0.0142341	4.97011	5.753	4.45257
chr1	159373152	159374152	DHS_19428:::chr1:::159373652	90.1939	258.42	2.86516	1.51862	6.75607e-16	1.07636e-13	3.22537	3.8886	1.59259	1.98708	0.935219	2.05257	0.843101	1.52714	0.0306307	0.0284681	2.22233	2.91538	3.2234
chr1	159374798	159375798	p300_4159:::chr1:::159375298	57.8271	241.799	4.18141	2.06399	5.50378e-23	2.05581e-20	2.15453	1.72019	0.763726	1.1716	0.982315	1.58054	0.838281	0.980257	0.0367568	0.0427022	3.63314	3.9718	3.66813
chr1	159379718	159380718	p300_4160:::chr1:::159380218	35.5832	235.811	6.62704	2.72836	1.02586e-31	7.44267e-29	1.98241	4.16023	1.74711	1.71155	1.35554	1.89361	1.28743	0.608791	0.104144	0	2.54335	1.35264	3.07907
chr1	159660970	159661970	DHS_19469:::chr1:::159661470	0.582381	0.391271	0.671847	-0.573794	1	1	4.20511	0.554697	0.353099	0.722234	0.557324	0.494657	2.22386	0.0103185	0	0	1.42978	2.59707	0.919616
chr1	159671039	159672039	DHS_19470:::chr1:::159671539	0	0.391271	Inf	Inf	1	1	2.66885	0.576885	0.521803	0.716216	1.5041	0.548245	2.20952	0	0	0	2.46361	1.61595	1.71662
chr1	159867612	159868612	p300_4167:::chr1:::159868112	1.22034	0.833592	0.683083	-0.549868	1	1	2.74969	0.458373	0.25901	0.832516	1.02169	0.466518	0.798993	0.020637	0	0	5.80867	2.17718	2.06501
chr1	159870049	159871049	p300_4168:::chr1:::159870549	0	2.81547	Inf	Inf	0.19948	0.480096	1.90079	0.537285	0.775869	1.23274	0.796736	0.407593	0.791365	0	0	0	3.62499	2.3098	1.67015
chr1	160132794	160133794	p300_4169:::chr1:::160133294	7.26646	1.17381	0.161539	-2.63005	0.0459134	0.171438	2.50972	1.00374	0.52311	1.0867	0.98483	0.58397	1.61694	0.123822	0	0	6.72117	8.33628	2.11658
chr1	160947802	160948802	DHS_19541:::chr1:::160948302	0.582381	1.98188	3.40307	1.76684	0.64868	0.937611	4.43654	0.55842	0.331771	0.593783	1.09779	0.348584	0.678858	0.0103185	0.0490091	0	0.310018	1.42345	1.57384
chr1	160964761	160965761	DHS_19546:::chr1:::160965261	1.16476	2.39868	2.05937	1.0422	0.763236	1	3.58701	0.781923	0.595589	0.8756	0.722038	0.469328	0.713054	0.020637	0	0	1.53048	0.36505	0.747881
chr1	161343286	161344286	p300_4179:::chr1:::161343786	0	1.64166	Inf	Inf	0.474394	0.811819	1.66226	0.652585	0.557343	0.842607	0.912416	0.636507	0.835531	0	0	0	5.97788	3.08933	1.24419
chr1	161348923	161349923	p300_4180:::chr1:::161349423	18.0828	56.0969	3.10223	1.6333	3.68324e-05	0.000499729	2.58376	2.08155	0.913084	1.10755	0.625094	1.49481	0.517693	0.309555	0	0	2.85728	1.77005	1.51689
chr1	161359781	161360781	p300_4183:::chr1:::161360281	1.8583	5.682	3.05764	1.61242	0.260155	0.572337	3.9059	0.72004	0.534742	1.50393	0.562683	0.4682	2.04866	0.0309555	0.00612614	0	3.99745	2.76771	2.98433
chr1	162819650	162820650	p300_4228:::chr1:::162820150	5.57489	4.87393	0.874265	-0.193858	0.970365	1	2.66481	1.78251	0.578581	1.01776	0.744658	0.899692	0.572288	0.0928664	0	0	3.28712	4.42572	2.16988
chr1	162832831	162833831	DHS_19732:::chr1:::162833331	118.122	75.4905	0.639091	-0.645906	0.00473316	0.0294264	2.21538	2.29996	1.13035	1.01472	1.05471	1.05567	0.446172	2.01211	0.0551353	0	1.31443	3.20235	2.07474
chr1	163070206	163071206	p300_4238:::chr1:::163070706	68.1722	75.8562	1.11271	0.154083	0.586322	0.903649	2.3596	1.95941	0.922535	2.2519	0.293936	1.15217	0.272805	1.15567	0.0122523	0.0284681	7.3518	3.24329	2.44799
chr1	163110482	163111482	p300_4245:::chr1:::163110982	21.9661	53.0178	2.41362	1.2712	0.000892747	0.00742274	2.4422	2.63481	1.76267	1.11402	0.352524	1.37339	0.489747	0.371466	0.0367568	0.0142341	4.9598	5.14697	3.71383
chr1	163186723	163187723	DHS_19834:::chr1:::163187223	39.3287	32.3993	0.823807	-0.279622	0.495924	0.829668	1.96988	1.45052	0.760014	1.17436	0.72013	0.989479	0.563926	0.660383	0.0306307	0	2.28494	2.99751	2.10233
chr1	163197933	163198933	DHS_19836:::chr1:::163198433	5.63047	24.3186	4.31911	2.11073	0.00102871	0.00835684	4.06103	0.795582	0.615462	1.0071	0.921338	0.982909	0.668788	0.0928664	0	0	0.920174	0.482855	1.1541
chr1	163200927	163201927	p300_4253:::chr1:::163201427	25.1003	50.4404	2.00955	1.00687	0.00707332	0.0406109	5.23373	1.73214	0.574279	1.9499	0.629039	1.35157	0.832049	0.423058	0.0183784	0	8.15671	6.42027	3.2819
chr1	163203928	163204928	p300_4254:::chr1:::163204428	9.81829	9.22896	0.939977	-0.0893029	1	1	4.66416	0.8884	0.541607	0.969334	0.589881	0.51732	0.848846	0.165096	0	0	3.12859	2.05213	1.70367
chr1	163309495	163310495	p300_4257:::chr1:::163309995	0.637958	1.19934	1.87997	0.910706	0.970259	1	2.42287	1.24957	0.580001	0.923978	1.37446	0.656268	0.800249	0.0103185	0.00612614	0	2.91831	2.40643	1.74295
chr1	163372808	163373808	p300_4258:::chr1:::163373308	66.3429	37.0351	0.558237	-0.84105	0.07447	0.244766	3.55633	4.01495	2.21668	2.59804	0.966924	1.46336	1.17513	1.1144	0.122523	0.0569363	8.94526	4.61701	4.07259
chr1	163382451	163383451	DHS_19865:::chr1:::163382951	4.88136	2.841	0.58201	-0.780884	0.59625	0.911868	1.8923	1.0252	0.662062	1.8338	0.780589	0.521708	1.07606	0.0825479	0.0367568	0.0569363	1.44352	2.29949	1.84744
chr1	163695770	163696770	p300_4266:::chr1:::163696270	5.40816	7.32366	1.35419	0.437427	0.746421	1	2.44015	1.03127	0.783284	1.36479	0.920204	0.762015	0.93966	0.0928664	0	0	2.60241	1.28025	2.33142
chr1	163699086	163700086	DHS_19888:::chr1:::163699586	0.637958	1.19934	1.87997	0.910706	0.970259	1	2.48425	0.742441	0.570391	0.802097	0.667084	0.39953	0.63736	0.0103185	0	0	1.42132	2.79685	1.27331
chr1	163837739	163838739	p300_4269:::chr1:::163838239	15.5043	15.2767	0.985319	-0.0213378	1	1	2.97593	1.02406	0.396105	1.37734	0.596579	1.10981	0.597813	0.257962	0.00612614	0.0569363	2.96107	2.3307	2.77064
chr1	163845782	163846782	p300_4270:::chr1:::163846282	18.3607	16.3739	0.891795	-0.165216	0.844632	1	3.70929	0.782372	0.345853	1.12007	0.57351	0.702533	1.53379	0.309555	0.0122523	0.0142341	5.34319	3.05253	2.72797
chr1	163848324	163849324	p300_4271:::chr1:::163848824	38.6352	40.5904	1.05061	0.0712244	0.844504	1	4.30629	2.57747	0.696907	3.43299	0.413487	1.90378	0.566349	0.650065	0	0	8.8565	4.10064	3.42263
chr1	163850601	163851601	DHS_19908:::chr1:::163851101	9.06918	11.415	1.25866	0.331893	0.735674	1	3.76822	2.03149	0.762374	1.59015	0.57228	1.0118	0.62188	0.154777	0.0183784	0	2.69958	4.32845	3.26941
chr1	163852905	163853905	p300_4273:::chr1:::163853405	9.76271	6.41349	0.656937	-0.606172	0.509989	0.844732	3.48642	1.4644	0.853859	1.29838	0.702485	0.920736	0.892154	0.165096	0.00612614	0.0142341	2.60359	2.64429	2.20708
chr1	164594955	164595955	p300_4288:::chr1:::164595455	104.505	62.9272	0.602148	-0.731811	0.00309005	0.0208275	1.71439	4.55492	2.83215	1.15453	0.732166	2.95486	0.386279	1.77478	0	0	1.77664	3.20472	3.05065
chr1	164595446	164596446	p300_4289:::chr1:::164595946	108.97	77.3192	0.709544	-0.495035	0.0373619	0.146917	1.91785	4.24058	2.75275	1.0631	0.711638	2.54841	0.388858	1.84701	0	0	1.79878	1.60463	2.3635
chr1	164597957	164598957	DHS_19994:::chr1:::164598457	233.14	237.504	1.01872	0.0267513	0.855225	1	2.90265	0.559606	0.246076	0.96471	0.598979	0.74691	0.266635	3.94166	0.0306307	0.0854044	0.510982	2.01101	1.46488
chr1	165073189	165074189	p300_4293:::chr1:::165073689	3.02306	7.61283	2.51825	1.33242	0.244335	0.549183	2.40733	1.05342	0.396832	1.50742	0.439847	0.446723	1.52031	0.0515925	0	0	4.97949	2.36278	1.39208
chr1	165931642	165932642	p300_4303:::chr1:::165932142	10.8719	30.0516	2.76416	1.46684	0.00607825	0.0359115	3.1452	1.56151	0.634854	1.41757	0.603637	0.755961	0.552772	0.185733	0.0245046	0.0854044	3.63847	2.80163	2.78719
chr1	165934134	165935134	p300_4304:::chr1:::165934634	30.2595	34.3301	1.13452	0.182084	0.674148	0.955712	3.7005	1.7473	1.2101	3.25194	0.599291	0.568082	0.717375	0.505606	0.085766	0.0854044	2.59834	1.51496	3.39108
chr1	166400682	166401682	p300_4329:::chr1:::166401182	24.6557	30.8171	1.2499	0.321808	0.622981	0.933728	2.30869	2.04477	0.949099	1.7038	0.672791	0.848676	0.611879	0.423058	0.0122523	0.0854044	8.98192	8.31742	2.79491
chr1	166423996	166424996	p300_4332:::chr1:::166424496	441.845	327.897	0.742108	-0.430298	0.000919937	0.00760857	3.0437	4.83002	2.07376	9.36469	0.236615	2.79717	0.502651	7.48091	0.177658	0.256213	17.4925	10.7868	5.09855
chr1	166433223	166434223	p300_4334:::chr1:::166433723	301.45	222.754	0.738942	-0.436467	0.00386457	0.0249975	4.1911	5.8613	3.26127	7.82922	0.43478	4.47252	0.280972	5.10765	0.196037	0.213511	22.1982	13.4663	9.19616
chr1	166445152	166446152	DHS_20213:::chr1:::166445652	4.18782	7.27261	1.73661	0.796273	0.502749	0.837158	1.74987	0.751526	0.622907	1.03202	0.420755	0.706831	0.607455	0.0722294	0.0306307	0.0427022	1.95574	1.95478	1.66866
chr1	166452183	166453183	p300_4337:::chr1:::166452683	9.76271	21.8178	2.23481	1.16015	0.0525056	0.189532	3.51335	1.70385	0.337433	3.13821	0.346508	0.775539	0.470089	0.165096	0.0245046	0.0854044	11.2723	9.82396	4.70793
chr1	166461567	166462567	p300_4338:::chr1:::166462067	22.4373	24.6843	1.10015	0.137696	0.833063	1	3.59934	1.2568	0.561749	1.61303	0.473319	1.02153	0.511694	0.381784	0.00612614	0.0142341	9.04473	5.82676	2.60451
chr1	166468483	166469483	p300_4339:::chr1:::166468983	7.79326	7.17051	0.920091	-0.120152	0.966037	1	1.83011	1.50003	0.587463	1.30174	0.511408	1.0973	0.871459	0.13414	0.0367568	0	4.39156	3.52068	2.33142
chr1	166482557	166483557	p300_4340:::chr1:::166483057	17.5004	15.719	0.89821	-0.154875	0.814926	1	2.3829	1.95993	0.823899	2.47516	0.411278	1.37061	0.514119	0.299236	0.0490091	0.0142341	4.8759	4.29238	2.98875
chr1	166506554	166507554	p300_4342:::chr1:::166507054	10.4562	12.3591	1.18199	0.241213	0.771222	1	2.09557	2.13402	0.677458	1.85807	0.576219	0.754927	0.500494	0.175414	0.0245046	0.0284681	2.91582	6.24102	2.93299
chr1	166826925	166827925	DHS_20246:::chr1:::166827425	0	0.808067	Inf	Inf	0.844589	1	2.25316	1.20743	0.833479	1.19043	1.33139	0.875715	0.990979	0	0	0	1.18167	1.97297	0.705752
chr1	166923987	166924987	p300_4350:::chr1:::166924487	5.46374	21.2223	3.88422	1.95762	0.00415469	0.0264702	2.75064	2.10132	1.06622	2.58978	0.702283	1.34939	0.928368	0.0928664	0.00612614	0	2.89837	2.61404	5.13903
chr1	166929314	166930314	p300_4351:::chr1:::166929814	4.88136	29.5072	6.04488	2.59571	3.95671e-05	0.000530686	1.78927	1.79006	0.886266	0.843446	0.859541	0.982909	0.797401	0.0825479	0	0	4.41684	3.37999	6.10024
chr1	166991217	166992217	p300_4353:::chr1:::166991717	0	1.61613	Inf	Inf	0.477961	0.811819	2.24494	0.471711	0.656848	0.721524	0.699497	0.460089	0.98286	0	0.00612614	0	1.90954	1.78932	1.46632
chr1	167050214	167051214	p300_4356:::chr1:::167050714	5.04809	8.1062	1.6058	0.683289	0.515237	0.848965	2.42835	4.21419	3.07908	0.927443	1.73254	1.90561	0.381947	0.0825479	0.00612614	0	2.75895	1.65456	2.54228
chr1	167061949	167062949	p300_4357:::chr1:::167062449	27.7633	45.9577	1.65534	0.727129	0.048652	0.178925	1.53417	1.81648	0.724307	1.40049	0.41838	2.25925	0.354746	0.464332	0	0	2.96107	2.3307	2.77906
chr1	167221438	167222438	p300_4366:::chr1:::167221938	16.5579	29.1415	1.75997	0.815551	0.0922493	0.284629	3.0523	1.03904	0.482282	1.41805	0.729123	0.981773	0.472418	0.278599	0.0306307	0.0854044	6.98524	5.17303	2.69156
chr1	167511709	167512709	DHS_20377:::chr1:::167512209	14.6441	81.5127	5.56626	2.47671	2.1197e-11	1.47816e-09	1.75032	2.06323	1.23129	0.956094	1.00424	2.39571	0.357364	0.247644	0.0306307	0.0284681	3.23861	1.45347	1.37433
chr1	167515487	167516487	DHS_20380:::chr1:::167515987	97.6271	177.962	1.82287	0.866215	1.59293e-05	0.000242828	1.98304	3.62013	2.10311	1.62978	0.732261	2.96143	0.445528	1.65096	0.0367568	0.0569363	2.18808	2.12626	3.14606
chr1	167710328	167711328	p300_4393:::chr1:::167710828	38.5796	63.9478	1.65755	0.729056	0.0207659	0.0944721	1.71349	6.00317	4.44674	1.13201	1.26074	3.23607	0.744193	0.650065	0.0551353	0.0427022	3.09391	2.73731	3.82457
chr1	167973546	167974546	DHS_20514:::chr1:::167974046	11.5099	16.3145	1.41744	0.503285	0.4732	0.811819	2.35593	3.25469	2.04675	1.07652	2.09958	1.86374	0.78074	0.196051	0	0.0142341	2.62293	2.4851	4.00338
chr1	167975406	167976406	DHS_20515:::chr1:::167975906	14.1173	24.6333	1.74491	0.803149	0.127553	0.357118	2.47035	3.34805	1.78921	2.17883	2.71917	1.4729	0.494668	0.237325	0	0	2.34411	0.814007	3.41768
chr1	167978772	167979772	DHS_20519:::chr1:::167979272	17.6671	25.5179	1.44437	0.530444	0.302445	0.623277	3.0188	6.68565	4.5846	1.17681	5.09868	2.24663	0.643744	0.299236	0.0245046	0.0427022	1.82875	1.51052	2.26533
chr1	167983147	167984147	DHS_20520:::chr1:::167983647	1.27592	3.57249	2.79994	1.4854	0.440401	0.780237	2.00881	0.985736	0.570694	0.815101	2.25885	1.05449	0.712806	0.020637	0.00612614	0	1.98599	1.25442	0.790753
chr1	167985930	167986930	p300_4404:::chr1:::167986430	12.3701	30.3153	2.45069	1.29319	0.010338	0.0548399	4.29802	4.42145	1.47296	1.66256	1.46748	1.33999	0.387883	0.20637	0.00612614	0	8.39258	6.34168	4.81194
chr1	168369411	168370411	DHS_20618:::chr1:::168369911	0	0.391271	Inf	Inf	1	1	2.03697	0.473274	0.340142	0.652247	0.692112	0.506286	0.770027	0	0	0	0.105947	0.694935	1.01242
chr1	168773106	168774106	p300_4433:::chr1:::168773606	18.9986	27.6274	1.45418	0.540208	0.267654	0.578418	1.94915	2.74254	1.61774	1.16627	1.50693	1.42108	0.979079	0.319873	0.0367568	0	2.87466	2.73083	3.67057
chr1	169219369	169220369	p300_4456:::chr1:::169219869	148.299	137.184	0.925053	-0.112392	0.57804	0.896731	3.90268	6.73834	2.72435	5.68137	0.67379	2.06285	0.249138	2.50739	0.0980183	0.0142341	9.32957	6.79119	4.45085
chr1	169221510	169222510	DHS_20737:::chr1:::169222010	20.1078	54.6849	2.71959	1.44339	0.000195477	0.00206978	3.51797	2.96072	1.40349	2.07329	0.68948	2.3348	0.35303	0.34051	0.0306307	0.0142341	3.06009	2.0072	1.82763
chr1	169224491	169225491	DHS_20741:::chr1:::169224991	3.66102	6.83029	1.86568	0.899702	0.44585	0.784516	2.55627	1.0948	0.589467	1.19531	0.793179	1.08918	0.353968	0.061911	0	0	1.59547	1.39536	1.27052
chr1	169225993	169226993	p300_4458:::chr1:::169226493	10.8163	22.5748	2.08711	1.06151	0.0717909	0.238034	2.81094	1.38488	0.746485	1.50566	0.813881	1.11111	0.317763	0.185733	0.0122523	0	3.02268	3.05025	1.20352
chr1	169227844	169228844	DHS_20743:::chr1:::169228344	60.6835	97.9632	1.61433	0.690936	0.00796062	0.0445942	2.84054	2.30328	1.61642	1.14045	0.691041	2.42926	0.370565	1.03185	0.00612614	0	2.37082	1.90624	3.51707
chr1	169229780	169230780	p300_4459:::chr1:::169230280	105.751	137.525	1.30045	0.379012	0.140672	0.381876	2.63656	3.16696	1.21874	1.54162	0.400097	1.70734	0.39468	1.80574	0.0367568	0.0142341	3.5164	5.34691	2.33882
chr1	169427839	169428839	p300_4473:::chr1:::169428339	80.4868	98.4311	1.22295	0.290362	0.23297	0.531974	3.52557	4.85471	1.92792	2.89857	0.902462	1.29847	0.464859	1.36204	0.0551353	0.0427022	8.62265	11.7157	8.42368
chr1	169435279	169436279	DHS_20788:::chr1:::169435779	1.80272	10.9472	6.0726	2.60231	0.0184031	0.0861324	2.0338	0.974411	0.422914	1.06928	0.702368	0.641831	0.71192	0.0309555	0.00612614	0.0569363	1.14165	1.84329	2.30778
chr1	169462215	169463215	p300_4474:::chr1:::169462715	2.32952	5.60542	2.40625	1.26679	0.389175	0.723164	2.20355	1.45336	0.863475	0.952072	1.0468	0.935582	1.75741	0.041274	0.0183784	0	3.53001	3.7047	3.01184
chr1	169582098	169583098	p300_4484:::chr1:::169582598	1.8583	3.62354	1.94993	0.963419	0.621922	0.933728	2.00177	0.82517	0.434079	0.692017	0.897334	0.536559	1.36953	0.0309555	0	0	5.34462	4.25691	2.50804
chr1	169590994	169591994	p300_4485:::chr1:::169591494	16.6957	26.3005	1.57528	0.655612	0.298215	0.617144	2.23695	7.49127	7.09232	0.770942	4.03162	3.27965	0.636023	0.288918	0.0245046	0	3.01602	2.08242	2.22794
chr1	169784626	169785626	p300_4490:::chr1:::169785126	11.7322	16.6547	1.41958	0.505462	0.429618	0.769546	3.11544	0.839281	0.322395	0.947933	0.5763	0.479871	0.748565	0.196051	0.00612614	0	12.452	6.19157	3.77842
chr1	169845784	169846784	p300_4494:::chr1:::169846284	161.609	192.541	1.1914	0.252659	0.404131	0.741394	3.40462	3.91964	1.63787	4.31138	0.467201	2.62041	1.08255	2.75504	0.042883	0.0284681	14.5396	6.38838	9.5147
chr1	169859639	169860639	p300_4496:::chr1:::169860139	28.5946	44.129	1.54326	0.625985	0.104779	0.310916	1.73226	4.96744	4.86961	0.877191	2.40769	2.61633	1.63176	0.484969	0.0122523	0.0142341	3.65405	3.52736	4.52945
chr1	169899833	169900833	p300_4500:::chr1:::169900333	0	1.98188	Inf	Inf	0.361498	0.692865	2.88675	0.749591	0.445351	0.982092	1.01629	0.848102	1.31842	0	0	0	6.45034	2.32021	1.98836
chr1	169956326	169957326	p300_4501:::chr1:::169956826	16.5579	27.0064	1.63103	0.705781	0.152623	0.402654	2.16797	1.38058	0.52638	1.89587	0.454365	0.841603	0.621725	0.278599	0	0	12.4891	5.83539	3.42302
chr1	169986238	169987238	p300_4502:::chr1:::169986738	26.2095	25.4158	0.969719	-0.0443619	0.973475	1	3.83048	2.34486	0.926886	1.96768	0.576858	0.944345	0.763026	0.443695	0.00612614	0	7.76878	4.82032	4.07557
chr1	169995431	169996431	p300_4504:::chr1:::169995931	2.96748	1.59061	0.536013	-0.899659	0.682046	0.962043	2.78865	1.72665	0.696907	1.02158	0.90119	0.659	0.792888	0.0515925	0	0	8.42236	5.69533	3.00777
chr1	170031337	170032337	p300_4505:::chr1:::170031837	2.44068	8.47194	3.47114	1.79541	0.113251	0.328023	3.37184	0.935573	0.597991	1.6891	0.448372	0.688131	1.86451	0.041274	0.00612614	0	6.59896	2.93218	2.60629
chr1	170638754	170639754	DHS_20966:::chr1:::170639254	3.54986	18.4069	5.18524	2.37441	0.00818498	0.0455655	3.49789	3.29036	1.5097	1.70556	1.49823	1.9182	0.611399	0.061911	0	0	0.524918	1.72154	2.58642
chr1	171764362	171765362	DHS_21025:::chr1:::171764862	0.637958	3.18122	4.98657	2.31805	0.332307	0.661914	2.97652	1.28833	0.512564	1.03384	0.786275	0.4787	0.932257	0.0103185	0	0	3.61879	7.81914	2.03417
chr1	172031323	172032323	p300_4529:::chr1:::172031823	0.637958	0.782542	1.22664	0.294708	1	1	3.69449	0.757756	0.413788	0.691201	0.39659	0.753579	0.470777	0.0103185	0	0	3.40259	4.46371	2.34009
chr1	172032682	172033682	p300_4530:::chr1:::172033182	4.29897	6.41349	1.49186	0.577117	0.639993	0.933929	2.43342	0.608196	0.407767	1.02653	0.350735	0.560255	0.819337	0.0722294	0	0	3.7517	1.53803	1.40043
chr1	172624849	172625849	p300_4550:::chr1:::172625349	77.7682	111.879	1.43862	0.524687	0.0284166	0.119804	2.24108	2.3591	1.01776	1.58918	0.651133	1.5849	0.607659	1.32077	0.0183784	0.0142341	4.21169	4.0993	4.17884
chr1	172626257	172627257	DHS_21131:::chr1:::172626757	120.509	129.605	1.07548	0.104985	0.604731	0.919672	2.63277	1.90341	0.68199	1.47949	0.825307	1.08568	0.604611	2.03274	0.0183784	0.0142341	1.93113	5.97876	1.43017
chr1	172819027	172820027	p300_4558:::chr1:::172819527	124.612	357.787	2.8712	1.52165	2.02673e-20	5.73171e-18	3.73235	3.16079	1.6088	4.78641	0.44222	2.90044	0.452074	2.11529	0.042883	0.185043	7.7899	5.19926	3.34653
chr1	172822110	172823110	p300_4559:::chr1:::172822610	26.3206	109.217	4.14947	2.05293	9.28918e-12	6.98655e-10	6.25647	1.4983	0.524437	2.53015	0.385045	2.0124	0.33354	0.443695	0.0306307	0.0996385	9.20446	4.91942	2.29056
chr1	172824451	172825451	p300_4560:::chr1:::172824951	41.9627	186.323	4.44021	2.15063	1.86911e-19	4.75806e-17	4.48546	3.00065	1.37316	1.72534	0.43422	2.32901	0.218629	0.711976	0.0245046	0.0569363	6.74561	5.00177	1.13857
chr1	172831394	172832394	p300_4561:::chr1:::172831894	31.2576	99.2052	3.1738	1.66621	2.12892e-08	7.30576e-07	2.63583	4.61112	2.60633	1.08562	0.929561	2.62959	0.186357	0.526243	0.0122523	0.0284681	3.4193	2.79294	4.93202
chr1	172919958	172920958	DHS_21196:::chr1:::172920458	53.3059	76.0688	1.42703	0.513011	0.075151	0.246385	1.5455	2.45622	1.14008	1.70231	1.28001	0.98224	1.13562	0.908027	0.0980183	0.0996385	1.2784	3.35415	4.0721
chr1	172976317	172977317	p300_4574:::chr1:::172976817	105.338	66.9164	0.635253	-0.654596	0.00869848	0.0477867	2.77238	2.38103	1.24562	5.25797	0.406866	1.89895	0.842136	1.77478	0.0306307	0.0284681	6.02514	4.55086	1.47211
chr1	173026975	173027975	p300_4583:::chr1:::173027475	61.3214	10.5049	0.171308	-2.54533	3.9455e-10	2.09587e-08	1.98512	2.04888	1.46595	3.86195	0.372638	2.18362	0.710912	1.04217	0.0122523	0.0996385	12.2071	4.82239	0.99418
chr1	173239991	173240991	DHS_21338:::chr1:::173240491	11.5654	45.4899	3.93326	1.97573	1.68394e-05	0.00025444	2.46749	1.37819	0.762197	1.09966	0.515586	1.37284	0.341306	0.196051	0	0.0142341	0.508731	1.73519	1.51919
chr1	173251844	173252844	p300_4610:::chr1:::173252344	442.758	398.428	0.899877	-0.152201	0.229645	0.526641	6.2749	3.95492	1.62506	3.3547	0.347946	2.65597	0.265522	7.51186	0.281802	0.45549	6.9739	6.59105	2.6424
chr1	173298070	173299070	DHS_21363:::chr1:::173298570	4.93693	4.40608	0.892474	-0.164118	1	1	1.54845	0.997254	0.423847	1.1179	1.00794	1.50004	0.543858	0.0825479	0.0183784	0.0569363	1.33409	1.75013	1.64336
chr1	173401239	173402239	p300_4638:::chr1:::173401739	34.0583	55.7056	1.63559	0.709815	0.0391314	0.152376	3.97249	2.44303	0.876488	3.56315	0.500034	1.24322	0.610532	0.577836	0.0122523	0.0284681	2.86657	5.80197	4.54916
chr1	173407775	173408775	p300_4640:::chr1:::173408275	342.304	373.854	1.09217	0.127199	0.345478	0.678281	3.35983	5.54417	2.94101	6.52754	0.389115	4.71724	0.800918	5.79899	0.214415	0.0427022	11.402	7.51726	7.68287
chr1	173425182	173426182	DHS_21418:::chr1:::173425682	23.1864	65.8192	2.83869	1.50523	2.25081e-05	0.000326946	2.56073	0.861023	0.645592	1.06898	0.59631	0.90441	1.39192	0.392103	0.0122523	0	1.6087	2.11039	4.04906
chr1	173756009	173757009	DHS_21521:::chr1:::173756509	0	0	NA	NA	NA	NA	1.72486	0.593022	0.494339	0.471094	0.569166	0.755476	0.469555	0	0	0	0.839868	1.10179	0.852735
chr1	173834407	173835407	p300_4650:::chr1:::173834907	11.5654	2.44973	0.211815	-2.23913	0.0170532	0.0811522	2.93295	1.0333	0.646924	2.38409	0.391976	0.937526	2.69598	0.196051	0	0	6.33691	1.64075	0.846578
chr1	173878916	173879916	p300_4652:::chr1:::173879416	4.13224	8.13172	1.96787	0.976636	0.387718	0.72171	3.63539	1.44341	0.442956	1.29109	0.515519	0.744645	0.948787	0.0722294	0.00612614	0	4.96696	1.73759	1.23604
chr1	173884907	173885907	DHS_21540:::chr1:::173885407	0	6.90686	Inf	Inf	0.0102523	0.0545191	2.51122	0.578135	0.522189	0.534047	0.787801	0.609612	0.929557	0	0	0	1.08434	0.853497	1.55428
chr1	174191578	174192578	p300_4679:::chr1:::174192078	5.40816	4.87393	0.901218	-0.150052	0.966333	1	4.64405	1.31271	0.664699	0.730147	0.449433	1.1381	0.625917	0.0928664	0.0183784	0	3.22061	2.89713	1.09914
chr1	174230968	174231968	p300_4682:::chr1:::174231468	43.1831	29.0394	0.672471	-0.572456	0.129179	0.359837	3.25419	3.79148	1.63258	1.86714	1.0095	2.10264	0.464663	0.732613	0.0490091	0.0427022	5.11795	4.82032	2.46886
chr1	174239885	174240885	p300_4683:::chr1:::174240385	124.641	99.4517	0.797904	-0.325714	0.146651	0.392936	2.54815	4.9625	1.87957	2.24891	0.412096	2.69762	0.222486	2.10497	0.0490091	0.0142341	7.66818	6.2044	14.1782
chr1	174338840	174339840	DHS_21700:::chr1:::174339340	1.80272	3.62354	2.01004	1.00722	0.624712	0.933728	2.34467	1.76495	1.15471	1.38839	1.74482	1.04927	0.217386	0.0309555	0	0	1.63308	1.53026	1.9507
chr1	174348025	174349025	p300_4701:::chr1:::174348525	7.90441	12.8525	1.62599	0.701319	0.362245	0.693607	4.37196	2.18286	0.925635	1.54791	0.993348	1.44567	0.505357	0.13414	0.0122523	0	18.047	11.1628	7.98614
chr1	174356270	174357270	p300_4702:::chr1:::174356770	8.54237	6.80476	0.796589	-0.328092	0.778338	1	2.9903	1.32853	0.661153	1.26131	0.800796	0.935115	0.487107	0.144459	0.0122523	0	11.3106	4.73814	10.8424
chr1	174361597	174362597	p300_4703:::chr1:::174362097	10.1784	11.7042	1.14991	0.201523	0.87451	1	1.54093	0.893472	0.414714	1.21938	0.766563	0.849673	0.41887	0.175414	0.0122523	0	1.6276	1.42345	1.15724
chr1	174371881	174372881	p300_4705:::chr1:::174372381	18.3607	34.2025	1.86281	0.897483	0.0449541	0.168963	1.87613	1.15206	0.845024	1.40434	1.31971	1.08206	0.717375	0.309555	0.0306307	0.0142341	2.66497	1.94225	2.18114
chr1	174380045	174381045	DHS_21715:::chr1:::174380545	1.22034	22.158	18.1573	4.18248	6.84847e-06	0.000116739	1.83496	1.25347	0.909499	1.06694	1.62985	1.32096	0.736008	0.020637	0.0122523	0.0142341	1.2998	1.83631	1.91089
chr1	174385275	174386275	DHS_21718:::chr1:::174385775	45.457	122.835	2.70221	1.43414	3.76266e-08	1.21056e-06	4.31765	4.64071	1.30547	3.56031	0.536234	1.92028	0.530453	0.773887	0.0306307	0	2.76506	2.4538	3.39999
chr1	174387879	174388879	p300_4709:::chr1:::174388379	10.2339	42.6999	4.17239	2.06087	2.03045e-05	0.00029906	3.31693	1.60707	0.558249	1.95886	0.610603	1.21353	1.38111	0.175414	0	0.0711703	3.66952	1.32146	1.97674
chr1	174398321	174399321	DHS_21723:::chr1:::174398821	40.798	68.1668	1.67084	0.740572	0.0172796	0.0819704	2.15778	3.86607	1.83089	1.37243	0.849856	1.37717	0.833315	0.691339	0.0245046	0.0284681	1.63308	2.9585	4.13363
chr1	174440273	174441273	DHS_21737:::chr1:::174440773	97.6271	78.7228	0.806362	-0.310501	0.209832	0.495469	2.8051	6.02291	2.94961	2.08106	0.745519	2.49103	0.331596	1.65096	0.0918921	0.0854044	4.11688	4.85153	4.33414
chr1	174442719	174443719	p300_4716:::chr1:::174443219	72.4712	63.7097	0.879103	-0.185895	0.518106	0.850155	2.40098	4.1155	2.15941	1.31657	0.686095	2.80987	0.387614	1.2279	0.0490091	0	3.29061	2.93218	2.85526
chr1	174445412	174446412	p300_4717:::chr1:::174445912	31.1464	43.5846	1.39934	0.484751	0.196518	0.477212	2.1954	1.26428	0.802499	1.62092	0.718783	1.60201	0.579956	0.526243	0.00612614	0.0142341	6.52398	5.41056	2.19454
chr1	174546704	174547704	DHS_21761:::chr1:::174547204	3.02306	14.5197	4.80298	2.26393	0.0106687	0.0560664	2.19157	1.85844	1.30801	0.611197	1.34834	1.16104	0.534104	0.0515925	0	0	1.60157	1.21639	1.56066
chr1	174587128	174588128	p300_4731:::chr1:::174587628	31.6732	82.4229	2.60229	1.37978	1.01421e-05	0.000163976	2.07782	2.87545	1.04502	2.97391	0.75689	1.12184	0.696276	0.536562	0	0.0142341	4.58531	6.68364	5.12213
chr1	174613771	174614771	DHS_21777:::chr1:::174614271	1.27592	4.79735	3.75993	1.91071	0.240972	0.544835	2.22507	0.864804	0.340588	0.808604	0.63843	0.434529	0.813402	0.020637	0.00612614	0.0284681	1.54582	2.50505	1.57493
chr1	174685023	174686023	p300_4734:::chr1:::174685523	0	0.782542	Inf	Inf	0.849188	1	2.63604	0.761674	0.676335	0.864615	0.820803	0.549106	0.899396	0	0.00612614	0	2.18324	2.71336	3.22552
chr1	174850788	174851788	DHS_21788:::chr1:::174851288	12.259	20.9077	1.7055	0.770194	0.178175	0.446801	2.45632	0.968519	0.326944	1.48794	0.671475	0.755726	0.762923	0.20637	0	0.0142341	1.34423	3.52689	2.26255
chr1	175251792	175252792	DHS_21799:::chr1:::175252292	0	0.808067	Inf	Inf	0.844589	1	2.15539	0.953299	0.527875	0.793913	1.89902	0.848249	0.811103	0	0	0	1.97306	4.56771	1.87158
chr1	175319631	175320631	p300_4740:::chr1:::175320131	773.057	871.318	1.12711	0.172625	0.0998084	0.301675	2.32595	3.77021	2.29308	1.45646	1.37154	1.19196	0.378303	13.0735	0.116397	0.156575	3.96969	7.10136	4.20293
chr1	175348571	175349571	p300_4742:::chr1:::175349071	57.9093	15.668	0.27056	-1.88598	0.000248639	0.00253684	4.08497	1.65089	0.760145	2.4576	0.419672	1.64886	0.9565	0.990575	0.0551353	0.0996385	6.87392	6.37244	2.35378
chr1	176414658	176415658	DHS_21883:::chr1:::176415158	4.29897	6.36244	1.47999	0.565587	0.641607	0.934186	2.34123	0.614665	0.473185	1.39486	0.476384	0.350939	1.66741	0.0722294	0	0	2.08075	2.04724	1.55341
chr1	176416030	176417030	p300_4752:::chr1:::176416530	31.6177	56.6923	1.79306	0.842424	0.0158878	0.0767222	3.57147	2.1732	0.733608	2.75579	0.444277	0.85972	1.27752	0.536562	0.00612614	0.0284681	4.21852	4.84233	3.59028
chr1	176426367	176427367	DHS_21885:::chr1:::176426867	6.73965	9.35659	1.38829	0.473308	0.63094	0.933728	2.47105	0.995024	0.445925	1.303	0.625094	0.200795	0.954035	0.113503	0	0.0284681	2.02391	1.71799	1.5643
chr1	176429577	176430577	p300_4753:::chr1:::176430077	16.6135	15.2512	0.917998	-0.123437	0.920766	1	3.2064	1.07473	0.54712	0.938058	0.844589	1.65691	0.448359	0.278599	0.00612614	0	4.81174	2.99835	1.29321
chr1	176953969	176954969	DHS_21920:::chr1:::176954469	3.54986	6.09879	1.71804	0.780761	0.582948	0.900303	5.02026	1.17767	0.348573	1.24771	0.549576	0.665884	0.993289	0.061911	0	0.0142341	3.3164	3.26299	2.05145
chr1	176958476	176959476	p300_4763:::chr1:::176958976	122.365	136.181	1.1129	0.154329	0.479542	0.813249	4.01905	4.60939	1.80456	2.11118	0.436756	1.80982	0.438043	2.08434	0.0245046	0.0569363	15.3295	4.96048	4.08944
chr1	176960567	176961567	DHS_21925:::chr1:::176961067	46.6508	81.062	1.73763	0.797125	0.0122664	0.0627717	2.87069	2.10045	0.796435	1.50265	0.889928	1.18305	1.31041	0.784205	0	0.0142341	2.36096	1.48129	0.980924
chr1	176969380	176970380	p300_4764:::chr1:::176969880	48.5912	93.319	1.92049	0.941475	0.000664839	0.00580841	4.08143	2.25142	0.72697	2.30788	0.52533	1.05024	3.82952	0.825479	0.0183784	0.0284681	4.86835	1.7823	6.76188
chr1	177797359	177798359	DHS_21984:::chr1:::177797859	0.637958	15.3533	24.0663	4.58894	0.000141449	0.00157702	4.86023	0.875838	0.357746	0.881411	0.653097	0.9226	0.396444	0.0103185	0	0.0142341	1.45872	0.797346	1.66983
chr1	178273798	178274798	DHS_22049:::chr1:::178274298	1.8583	2.39868	1.29079	0.368258	0.980609	1	3.48811	1.05827	0.569515	1.38331	0.870751	0.23935	1.03143	0.0309555	0.00612614	0	0.638609	0.977392	1.33493
chr1	178278009	178279009	p300_4781:::chr1:::178278509	1.91387	1.19934	0.626655	-0.674257	0.956515	1	4.049	0.657665	0.51802	0.964961	0.751489	0.544271	1.14694	0.0309555	0	0	3.31924	0.725728	2.31281
chr1	178282355	178283355	DHS_22051:::chr1:::178282855	0	0.416796	Inf	Inf	1	1	2.45337	0.349367	0.0682789	0.558634	0.631038	0.286956	0.737192	0	0	0	1.65886	1.00439	0.60969
chr1	178538395	178539395	p300_4785:::chr1:::178538895	1.27592	2.00741	1.57331	0.653799	0.896894	1	2.12337	0.411904	0.183542	1.0324	0.6143	0.321404	2.78072	0.020637	0.0122523	0	6.17428	5.84984	2.39009
chr1	178542686	178543686	p300_4786:::chr1:::178543186	0.582381	0	0	#NAME?	0.903996	1	2.15682	0.523384	0.423577	0.828167	0.557216	0.366505	0.945894	0.0103185	0	0	7.07792	2.56565	1.66866
chr1	178550594	178551594	DHS_22083:::chr1:::178551094	0	0.416796	Inf	Inf	1	1	2.42113	0.68917	0.405708	0.750048	0.62671	0.426267	0.934762	0	0	0	2.79956	2.90749	1.39336
chr1	178573950	178574950	p300_4788:::chr1:::178574450	4.2434	3.25779	0.767733	-0.381324	0.853978	1	2.7372	1.25267	0.456033	1.5041	0.681634	0.40727	0.897381	0.0722294	0	0	18.068	8.04996	3.46129
chr1	178654608	178655608	DHS_22107:::chr1:::178655108	25.6271	43.8398	1.71068	0.774571	0.0492073	0.180419	2.52307	2.1555	1.41003	0.996708	0.728708	1.37255	1.03995	0.433377	0	0.0142341	1.6276	0.915075	1.71271
chr1	179251475	179252475	p300_4802:::chr1:::179251975	14.1173	34.3301	2.43178	1.28201	0.00694983	0.040045	2.16736	3.77558	2.12728	1.23283	1.97876	1.5752	0.620941	0.237325	0.00612614	0.0142341	2.49895	4.17234	2.57794
chr1	179268493	179269493	p300_4804:::chr1:::179268993	44.8191	44.6818	0.996938	-0.00442466	1	1	1.89928	7.30727	6.58967	1.06103	1.98766	3.66543	0.61149	0.763568	0.0245046	0	3.49429	4.02498	4.63201
chr1	179437973	179438973	DHS_22197:::chr1:::179438473	0	0.391271	Inf	Inf	1	1	2.18323	0.502624	0.504428	0.993072	0.702171	0.609488	1.02775	0	0	0	1.41406	0.74202	1.18236
chr1	179485506	179486506	p300_4807:::chr1:::179486006	5.51931	8.88874	1.61048	0.68749	0.481071	0.813249	2.16027	3.17591	1.49433	1.10489	0.815644	0.997194	0.576713	0.0928664	0	0	6.18922	5.24789	3.87681
chr1	179535139	179536139	DHS_22208:::chr1:::179535639	0.582381	3.59802	6.17811	2.62717	0.266131	0.576516	1.8826	0.71684	0.475326	0.802097	0.618273	0.849002	0.736689	0.0103185	0	0	1.06599	1.63149	1.53859
chr1	179537325	179538325	p300_4808:::chr1:::179537825	4.93693	15.719	3.18397	1.67083	0.0289665	0.121413	1.58029	1.00675	0.769656	0.967049	0.86312	0.670031	0.90374	0.0825479	0	0	5.50696	6.03827	1.71814
chr1	179546159	179547159	DHS_22210:::chr1:::179546659	1.22034	4.79735	3.93117	1.97496	0.243095	0.547585	2.17946	0.893559	0.889618	0.922114	1.23452	0.833651	1.00488	0.020637	0	0	1.88725	1.41475	1.61022
chr1	179553173	179554173	p300_4809:::chr1:::179553673	4.41013	9.30554	2.11004	1.07727	0.250535	0.558819	2.52307	2.11794	0.970294	1.91937	0.804105	0.831667	0.684767	0.0722294	0	0	4.77198	2.75447	2.90705
chr1	179643921	179644921	DHS_22229:::chr1:::179644421	13.7838	24.5567	1.78156	0.833144	0.130352	0.361633	3.13281	1.10939	0.695165	1.40873	0.605167	0.865649	0.977424	0.237325	0.0122523	0.0142341	2.50211	2.77742	1.95418
chr1	179647462	179648462	p300_4812:::chr1:::179647962	32.7824	41.2114	1.25712	0.330123	0.403483	0.740602	2.91374	2.0828	0.837187	1.72259	0.791474	1.50791	0.735888	0.557199	0.00612614	0.0569363	3.50171	2.63896	1.8689
chr1	179648891	179649891	p300_4813:::chr1:::179649391	25.1003	38.6086	1.53817	0.621216	0.121973	0.346445	2.71496	1.88441	0.626627	2.13619	0.496513	0.987572	0.745666	0.423058	0	0	2.92771	1.62164	2.37028
chr1	180201540	180202540	DHS_22303:::chr1:::180202040	4.88136	23.4595	4.80594	2.26482	0.00085244	0.00714049	1.66396	0.656094	0.354365	1.37037	0.550898	0.767915	1.88215	0.0825479	0.00612614	0.0142341	1.24174	1.95478	1.38437
chr1	180207704	180208704	DHS_22305:::chr1:::180208204	32.7268	46.7658	1.42897	0.51498	0.164573	0.422493	3.4266	1.16936	0.668026	1.29167	1.14332	1.62309	0.828859	0.557199	0.0367568	0.0711703	2.18479	2.35433	2.0505
chr1	180221355	180222355	p300_4830:::chr1:::180221855	3.60544	10.0881	2.79802	1.4844	0.133235	0.366976	2.6926	0.618279	0.537325	1.44875	0.362278	0.487569	1.13986	0.061911	0.0183784	0	4.47321	3.8323	1.96282
chr1	180237465	180238465	DHS_22320:::chr1:::180237965	11.5654	33.8112	2.92347	1.54768	0.00201085	0.0146062	2.72865	0.912169	0.411949	1.46286	0.396916	1.37061	1.08403	0.196051	0.0122523	0	1.96747	3.81545	2.29904
chr1	180239358	180240358	DHS_22321:::chr1:::180239858	33.5315	32.6884	0.974857	-0.0367376	0.973094	1	1.9793	0.817701	0.612597	0.967	0.468006	0.951468	0.602966	0.567517	0.0612614	0	0.89598	1.8284	0.713495
chr1	180278303	180279303	p300_4835:::chr1:::180278803	36.0834	37.1711	1.03015	0.0428477	0.939888	1	4.46707	3.76467	1.11429	1.95543	0.50278	2.04882	0.361628	0.608791	0.0122523	0.0142341	4.07026	2.23518	2.09175
chr1	180281457	180282457	DHS_22337:::chr1:::180281957	10.1228	11.7042	1.15622	0.209422	0.879844	1	2.57333	0.967958	0.763173	1.27146	0.887631	1.81062	0.420136	0.175414	0	0.0284681	1.19623	1.68999	1.5388
chr1	180284374	180285374	DHS_22338:::chr1:::180284874	5.46374	3.23227	0.591586	-0.75734	0.571842	0.890213	1.8446	0.615295	0.57119	0.889517	1.3627	1.28211	0.551595	0.0928664	0	0.0142341	1.94087	1.655	1.10122
chr1	180287640	180288640	p300_4836:::chr1:::180288140	157.535	84.4558	0.536109	-0.899403	1.95092e-05	0.000288767	3.80289	4.09029	1.34331	3.49865	1.30792	2.97332	0.517758	2.66217	0.0183784	0.0569363	5.0879	5.97201	3.47855
chr1	180290045	180291045	p300_4838:::chr1:::180290545	148.077	67.7756	0.457706	-1.12751	4.08165e-07	9.89748e-06	4.09824	6.85863	3.5505	3.73587	0.790745	2.95923	0.410212	2.50739	0.0612614	0.0711703	10.974	6.27745	3.77246
chr1	180294965	180295965	p300_4840:::chr1:::180295465	33.1981	21.3244	0.64234	-0.638591	0.136647	0.373844	4.02598	1.28562	0.557693	1.04946	1.14029	1.50004	0.466164	0.567517	0.0183784	0.0284681	4.91944	6.34423	2.58953
chr1	180298736	180299736	p300_4841:::chr1:::180299236	478.455	283.317	0.59215	-0.755966	6.66374e-09	2.59923e-07	3.04817	8.69214	8.53174	2.75077	1.04505	8.5027	0.305886	8.10002	0.343064	0.185043	5.5103	7.69014	4.02624
chr1	180305880	180306880	DHS_22348:::chr1:::180306380	42.7674	20.2527	0.473555	-1.0784	0.00759016	0.0430404	1.58795	0.965872	0.45372	1.31473	0.60644	0.930724	0.601993	0.722294	0.00612614	0	1.69589	1.801	1.59164
chr1	180328874	180329874	DHS_22354:::chr1:::180329374	1.22034	5.29073	4.33546	2.11618	0.194813	0.475313	2.34486	0.841325	0.689135	1.02193	0.859687	1.06195	1.01606	0.020637	0	0	1.63134	2.14009	1.12815
chr1	180436790	180437790	p300_4848:::chr1:::180437290	3.07864	13.7882	4.47867	2.16307	0.0155751	0.0756228	1.96453	0.901913	0.683962	0.952757	0.586643	0.792961	1.17463	0.0515925	0.0183784	0.0142341	9.7851	3.81631	2.10599
chr1	181575464	181576464	p300_4904:::chr1:::181575964	35.6943	46.5022	1.30279	0.381603	0.310283	0.63528	1.50711	1.84603	1.33472	0.825755	0.755812	1.7313	0.321384	0.608791	0	0	3.44906	2.18154	3.42097
chr1	181578559	181579559	DHS_22633:::chr1:::181579059	21.0236	29.1415	1.38613	0.471061	0.301472	0.621782	1.71415	0.76218	0.660377	0.916576	0.484384	1.31334	0.574995	0.350829	0	0	0.705233	0.462583	1.053
chr1	181594443	181595443	DHS_22642:::chr1:::181594943	47.4821	22.158	0.466661	-1.09955	0.00419893	0.026706	1.64382	0.907687	0.795811	1.04129	0.972112	1.13125	1.2228	0.804842	0.0122523	0	3.06202	1.26246	1.35852
chr1	181652816	181653816	p300_4908:::chr1:::181653316	17.556	42.2066	2.40412	1.26551	0.00323915	0.0216262	2.66863	1.37608	0.712989	1.14441	1.30163	1.37339	0.531134	0.299236	0.0183784	0.0142341	5.70007	2.23359	2.69695
chr1	181664895	181665895	p300_4910:::chr1:::181665395	31.5621	65.8363	2.08593	1.06069	0.02116	0.0957797	1.57692	3.19581	3.17739	1.72351	0.332494	1.71531	0.201762	0.536562	0.0673875	0.0142341	2.49336	2.32408	2.58642
chr1	181774647	181775647	p300_4912:::chr1:::181775147	28.8725	70.591	2.44492	1.28979	8.93278e-05	0.00106587	1.85587	1.78043	0.882749	1.02765	0.531465	1.22349	0.209325	0.484969	0.104144	0.0427022	4.56311	4.42055	4.61206
chr1	181777516	181778516	p300_4913:::chr1:::181778016	133.292	120.138	0.901314	-0.149898	0.443549	0.782988	2.97922	6.99483	4.6257	2.74918	1.17508	5.31861	0.468118	2.27007	0.147027	0.0854044	5.21952	5.5634	4.83188
chr1	181846841	181847841	DHS_22719:::chr1:::181847341	37.8861	57.9256	1.52894	0.612533	0.0608369	0.211394	2.69762	4.01894	2.33179	1.2023	1.01545	2.24579	1.5498	0.639747	0.00612614	0	2.32416	1.23864	1.90864
chr1	182140491	182141491	p300_4923:::chr1:::182140991	39.9667	60.6816	1.51831	0.602462	0.0578803	0.203763	3.72256	2.10603	0.830652	1.68867	0.716607	1.27719	0.818513	0.670702	0.042883	0	11.8132	7.74864	3.61816
chr1	182144871	182145871	p300_4924:::chr1:::182145371	48.12	76.4346	1.58842	0.667588	0.0209495	0.0950665	1.84352	2.9998	1.2688	1.14595	0.643004	1.76592	0.430425	0.815161	0.0183784	0	5.29677	2.66633	3.86239
chr1	182195236	182196236	DHS_22798:::chr1:::182195736	3.60544	10.5815	2.93486	1.55329	0.111802	0.325141	2.18548	2.10941	1.37075	0.890078	2.05556	1.16588	0.36374	0.061911	0.0122523	0	1.3012	1.60031	1.50571
chr1	182209536	182210536	p300_4932:::chr1:::182210036	49.0069	45.8472	0.935526	-0.0961497	0.758884	1	3.13104	2.8871	1.20979	1.77975	0.951391	1.50576	0.538031	0.835798	0.042883	0.0142341	11.3395	7.66605	5.31826
chr1	182213887	182214887	p300_4933:::chr1:::182214387	68.1167	36.5501	0.536581	-0.898132	0.00416305	0.0265199	2.06651	3.97005	1.50067	2.01624	1.21537	2.04046	0.450922	1.15567	0.0551353	0	10.2284	7.35837	3.90837
chr1	182230821	182231821	DHS_22805:::chr1:::182231321	1.74714	3.59802	2.05937	1.0422	0.62886	0.933728	2.40204	0.835116	0.456033	1.72563	0.744073	0.383313	0.492368	0.0309555	0	0	1.2784	2.01249	2.29056
chr1	182237529	182238529	DHS_22810:::chr1:::182238029	2.44068	3.28332	1.34525	0.427874	0.920663	1	2.09431	0.826608	0.585614	0.97065	0.732697	0.933543	0.717375	0.041274	0.00612614	0	1.35861	2.07935	1.17206
chr1	182243578	182244578	p300_4937:::chr1:::182244078	179.75	121.1	0.673712	-0.569797	0.00253398	0.0176921	3.26282	5.53245	3.18668	5.16979	0.623839	1.81854	0.292959	3.04396	0.263424	0.0711703	8.76695	7.93172	5.23603
chr1	182462478	182463478	DHS_22877:::chr1:::182462978	5.57489	21.7668	3.90443	1.96511	0.00326761	0.0217805	1.58988	2.08581	0.994604	0.898155	0.656757	1.26735	2.57223	0.0928664	0.0122523	0	2.37292	2.69787	3.30684
chr1	182477638	182478638	p300_4957:::chr1:::182478138	57.9093	46.0682	0.795523	-0.330024	0.485705	0.817822	3.08441	6.11077	3.58888	1.86479	1.08647	2.12865	0.372968	0.990575	0.042883	0.0284681	4.00265	3.19312	1.80908
chr1	182536600	182537600	p300_4966:::chr1:::182537100	138.452	161.146	1.16391	0.218982	0.269548	0.580086	3.18274	2.08124	0.932716	1.88224	0.364877	1.45247	0.522079	2.35262	0.128649	0.156575	4.29555	6.2885	2.34242
chr1	182691933	182692933	p300_4975:::chr1:::182692433	49.8405	48.3564	0.970222	-0.0436125	0.977932	1	2.69042	4.16023	2.60096	1.04788	1.70147	1.88809	0.516071	0.835798	0.0612614	0.0142341	4.12435	1.85505	2.70958
chr1	182693736	182694736	DHS_22962:::chr1:::182694236	107.528	68.8728	0.640513	-0.642701	0.00786604	0.0441802	1.93182	5.90733	4.9606	0.850427	1.74054	2.44029	0.31458	1.82637	0.0551353	0.142341	2.94733	3.02289	3.61659
chr1	182704488	182705488	DHS_22968:::chr1:::182704988	47.7044	76.0944	1.59512	0.673668	0.0192936	0.0891588	1.79862	1.74647	1.23891	0.922905	0.436292	1.49453	0.66588	0.804842	0.0673875	0.0854044	2.05809	2.99992	1.67306
chr1	182723863	182724863	p300_4981:::chr1:::182724363	418.574	279.693	0.668206	-0.581636	1.34162e-05	0.000209306	2.33478	9.14837	8.80772	3.6078	0.838341	6.29857	0.278384	7.09912	0.453334	0.0284681	8.10097	7.00951	3.9118
chr1	182759625	182760625	p300_4984:::chr1:::182760125	164.523	281.02	1.70809	0.772382	2.28367e-06	4.48533e-05	2.38482	6.44361	3.83734	1.33461	1.58072	2.35682	0.432391	2.78599	0.0612614	0.0142341	2.05653	3.73551	4.97601
chr1	182774079	182775079	DHS_23002:::chr1:::182774579	21.4393	26.6152	1.24142	0.311992	0.517595	0.850155	1.87837	0.850419	0.584786	1.06655	0.640549	1.12644	0.549912	0.361147	0.00612614	0	1.53004	1.05139	1.47951
chr1	182778397	182779397	p300_4986:::chr1:::182778897	333.152	284.202	0.853068	-0.229268	0.107063	0.315915	3.50724	7.30155	4.00263	2.8311	0.323356	4.66591	0.244213	5.6339	0.18991	0.156575	3.71289	2.00562	4.17414
chr1	182803871	182804871	p300_4990:::chr1:::182804371	23.7132	63.5482	2.67986	1.42216	7.37212e-05	0.000902994	2.13926	1.17856	0.647202	1.30804	0.773619	0.939046	0.327381	0.402421	0.0490091	0	7.02683	5.13801	4.74715
chr1	182818453	182819453	p300_4991:::chr1:::182818953	465.307	538.505	1.15731	0.210777	0.0817042	0.261078	3.66992	9.81058	4.46591	9.42906	0.394186	9.22212	0.210321	7.89365	0.275676	0.0854044	55.9562	24.5836	10.7532
chr1	182841636	182842636	p300_4997:::chr1:::182842136	44.7635	85.3744	1.90723	0.93148	0.00126269	0.00991639	3.2056	3.82387	2.25383	1.45023	1.39724	3.15738	0.497148	0.763568	0.00612614	0.0284681	3.79089	3.77588	2.5576
chr1	182845384	182846384	DHS_23030:::chr1:::182845884	7.26646	12.5123	1.72192	0.784021	0.327664	0.657737	1.92756	1.11629	0.825178	1.01074	1.53709	1.37106	1.2231	0.123822	0.00612614	0	3.01257	2.54061	2.48468
chr1	182849548	182850548	p300_4998:::chr1:::182850048	24.4624	82.8652	3.38746	1.7602	9.09525e-08	2.63864e-06	2.30201	1.16637	0.728068	1.17418	1.10763	1.51031	0.897261	0.41274	0.00612614	0.0427022	6.90798	4.66845	4.41749
chr1	182854567	182855567	p300_4999:::chr1:::182855067	318.09	477.883	1.50235	0.587219	6.31844e-06	0.000108945	3.28454	4.0253	1.23863	5.17378	0.7114	3.26081	0.450783	5.39657	0.422704	0.341618	53.6314	25.454	12.6137
chr1	182969308	182970308	p300_5015:::chr1:::182969808	3.60544	19.5212	5.41439	2.4368	0.00172498	0.0128845	1.84309	1.86473	1.0737	1.13169	0.825057	0.828813	1.18291	0.061911	0	0.0142341	2.94847	3.54565	3.61977
chr1	183146147	183147147	p300_5025:::chr1:::183146647	99.0964	107.32	1.08298	0.115012	0.635556	0.933728	3.48893	2.71715	0.965506	1.6416	0.622426	2.13031	0.285829	1.68191	0.104144	0.170809	3.60881	3.31397	2.96361
chr1	183160475	183161475	p300_5026:::chr1:::183160975	174.175	169.677	0.974176	-0.0377462	0.859459	1	2.44625	6.45372	2.24305	2.27918	0.759537	2.47835	0.297366	2.95109	0.0980183	0	5.08445	4.25749	4.00582
chr1	183162450	183163450	p300_5027:::chr1:::183162950	237.521	220.568	0.928624	-0.106833	0.525991	0.854195	3.20998	3.99034	2.49111	1.5468	0.538938	3.46713	0.422538	4.02421	0.122523	0.113873	3.14401	3.41064	4.11661
chr1	183163870	183164870	p300_5028:::chr1:::183164370	358.113	514.492	1.43668	0.522736	3.16024e-05	0.000438355	3.32052	5.81139	3.0416	2.69318	0.445678	4.27218	0.407008	6.06727	0.196037	0.0569363	6.10319	5.80865	7.68332
chr1	183186130	183187130	p300_5030:::chr1:::183186630	130.576	274.505	2.10226	1.07194	4.31244e-10	2.27053e-08	2.35486	7.78795	5.84968	2.31015	1.51977	4.80435	0.51651	2.20816	0.0612614	0.0569363	4.20867	4.17455	4.01566
chr1	183188349	183189349	p300_5032:::chr1:::183188849	19.8855	91.1074	4.5816	2.19585	8.06092e-11	5.00342e-09	2.87718	3.09463	1.71646	1.53369	1.54616	2.10717	0.9565	0.34051	0.0551353	0.0284681	2.90393	3.45517	2.33937
chr1	183261805	183262805	DHS_23176:::chr1:::183262305	0.637958	4.01481	6.29322	2.6538	0.20754	0.491902	3.16225	0.9171	0.549266	1.12348	0.607908	0.692519	1.44432	0.0103185	0	0	1.74506	1.61595	2.51362
chr1	183263357	183264357	p300_5034:::chr1:::183263857	0	4.48266	Inf	Inf	0.0603099	0.210217	2.46153	0.622343	0.502377	1.13033	0.590406	0.501443	2.12588	0	0.0122523	0	1.97164	1.84751	1.28971
chr1	183275432	183276432	DHS_23182:::chr1:::183275932	33.5315	62.0936	1.8518	0.888925	0.00746542	0.0424492	2.0634	3.66505	2.20151	1.01062	1.07898	1.70852	0.705758	0.567517	0.0306307	0	1.68314	3.31205	2.34558
chr1	183552817	183553817	p300_5039:::chr1:::183553317	65.8983	65.5129	0.994152	-0.00846204	1	1	3.10907	2.7377	0.717589	3.84269	0.577685	1.2147	0.374886	1.1144	0.0306307	0.0427022	2.45865	1.36835	3.38181
chr1	183555627	183556627	p300_5040:::chr1:::183556127	46.3729	43.2188	0.931985	-0.101621	0.800086	1	2.13982	1.61143	0.664855	1.57989	0.499781	1.02727	0.565273	0.784205	0.0306307	0.0427022	3.36213	1.1506	2.35724
chr1	183556939	183557939	p300_5041:::chr1:::183557439	19.4143	18.7642	0.966517	-0.0491325	0.950586	1	3.7694	1.47028	0.794119	1.61161	0.724869	0.756139	0.605015	0.330192	0.0490091	0.0854044	2.68994	3.28545	2.76993
chr1	183581996	183582996	DHS_23227:::chr1:::183582496	3.60544	7.19603	1.99588	0.997026	0.390691	0.72471	2.39277	0.796889	0.145053	0.815905	0.76794	0.97538	0.36374	0.061911	0.0122523	0	0.759036	0.995747	1.03619
chr1	183669999	183670999	p300_5043:::chr1:::183670499	14.8664	19.2405	1.29423	0.372091	0.554222	0.874544	2.80525	1.31376	0.894364	1.28886	0.839564	1.13189	0.891999	0.247644	0.0122523	0	3.19095	2.09303	2.17804
chr1	183672097	183673097	p300_5044:::chr1:::183672597	14.6441	19.8359	1.35454	0.437801	0.459967	0.798211	3.14775	1.53032	0.735151	2.00153	0.924951	1.02291	0.906522	0.247644	0.00612614	0	6.60957	4.2867	2.9274
chr1	183689048	183690048	p300_5046:::chr1:::183689548	13.9505	16.1103	1.15482	0.207663	0.786604	1	2.20005	1.23223	0.577299	1.24642	0.766039	0.943528	0.841489	0.237325	0.0183784	0	3.19673	4.19365	2.10016
chr1	183782829	183783829	p300_5050:::chr1:::183783329	486.582	442.183	0.908753	-0.138039	0.268406	0.578802	2.57852	6.96724	3.5989	3.78479	0.592706	4.56606	0.366571	8.23416	0.275676	0.0854044	10.1523	4.57817	6.02551
chr1	183790428	183791428	p300_5052:::chr1:::183790928	391.782	366.216	0.934745	-0.0973546	0.543247	0.864344	3.32941	4.62343	1.33777	7.39453	0.279839	3.98243	0.299523	6.64511	0.153154	0.113873	16.5484	9.05851	13.0832
chr1	183793251	183794251	DHS_23278:::chr1:::183793751	65.0646	116.923	1.79703	0.845612	0.0279987	0.118481	2.8411	2.63831	0.986601	1.56661	0.470032	2.41873	0.434042	1.1144	0.0183784	0.0284681	2.39374	2.20666	2.78203
chr1	183795052	183796052	DHS_23279:::chr1:::183795552	32.9491	80.7641	2.45117	1.29347	4.72656e-05	0.000618119	2.48961	1.86272	0.655622	1.49188	0.463798	2.41096	0.496644	0.557199	0.0183784	0	3.00192	1.76812	1.86606
chr1	183796385	183797385	DHS_23280:::chr1:::183796885	17.7227	74.138	4.18322	2.06461	1.37211e-08	4.93561e-07	2.43607	1.76929	0.621475	1.86136	0.352524	1.54847	0.828692	0.299236	0	0	1.72559	2.0896	2.21976
chr1	183816881	183817881	DHS_23288:::chr1:::183817381	14.0617	27.8145	1.97804	0.984068	0.0529148	0.190561	1.63343	0.971522	0.625068	0.876701	0.639842	1.05079	0.472721	0.237325	0.0306307	0	1.53531	1.31355	1.03656
chr1	183959829	183960829	p300_5064:::chr1:::183960329	367.513	499.164	1.35822	0.44172	0.000463017	0.00428197	2.90775	3.7013	2.25833	6.56043	0.237124	4.13415	0.202667	6.24269	0.122523	0.45549	30.916	14.2664	5.78368
chr1	183970349	183971349	p300_5065:::chr1:::183970849	133.128	201.396	1.5128	0.597219	0.00103983	0.00842908	3.33558	1.63589	0.610942	4.39155	0.314683	1.22878	0.4438	2.24943	0.0306307	0	8.09025	5.5634	4.94878
chr1	183975024	183976024	DHS_23361:::chr1:::183975524	24.1023	68.405	2.83811	1.50493	1.44838e-05	0.000223609	1.96474	1.34246	0.57119	1.11521	0.477932	1.45487	0.66312	0.402421	0.0183784	0.0142341	1.29391	1.69743	1.58421
chr1	183984421	183985421	p300_5067:::chr1:::183984921	112.324	187.837	1.67228	0.741813	0.000549921	0.00494387	3.73623	5.27208	2.07797	3.94273	0.461713	3.40897	0.704678	1.91924	0.0551353	0.0711703	7.08561	7.06087	3.66219
chr1	183993726	183994726	p300_5069:::chr1:::183994226	134.846	170.349	1.26328	0.337179	0.0809085	0.259516	2.78213	5.46773	2.17929	1.47409	0.553967	3.33314	0.384308	2.29071	0.042883	0.0427022	3.14482	2.50239	4.52624
chr1	183997881	183998881	p300_5070:::chr1:::183998381	29.9817	53.9363	1.79898	0.847176	0.0158751	0.0766727	2.65743	2.49122	1.11519	1.29943	0.755111	1.82478	0.343831	0.505606	0.0245046	0.0142341	3.55329	3.5857	3.06085
chr1	184001961	184002961	p300_5071:::chr1:::184002461	28.539	45.9067	1.60856	0.685769	0.0698634	0.23297	1.51263	2.43428	1.03728	1.48517	0.439599	1.49465	0.505775	0.484969	0.0122523	0	4.32018	2.68841	2.6133
chr1	184011818	184012818	p300_5072:::chr1:::184012318	165.937	220.237	1.32723	0.408418	0.0188028	0.0875225	3.18317	4.80845	2.04777	2.28716	0.422209	2.64224	0.319065	2.81695	0.171532	0.170809	11.481	7.57479	6.69662
chr1	184013752	184014752	DHS_23374:::chr1:::184014252	18.8319	57.9683	3.0782	1.62209	2.87428e-05	0.000403737	4.35803	1.90847	0.907441	1.67932	0.497971	1.11233	0.338621	0.319873	0.0367568	0.0284681	2.18043	1.69506	1.92926
chr1	184016169	184017169	DHS_23375:::chr1:::184016669	16.3912	18.1177	1.10533	0.144478	0.852109	1	1.61992	1.26698	0.842624	1.09515	1.01351	1.14354	0.568601	0.278599	0.0183784	0.0142341	1.04984	2.06585	1.68509
chr1	184018054	184019054	DHS_23376:::chr1:::184018554	21.2726	49.1134	2.30877	1.20712	0.00214614	0.0154432	1.50056	1.19114	0.69923	1.33875	0.9982	1.2643	0.48706	0.361147	0.0183784	0.0142341	2.06652	1.59469	1.27052
chr1	184020082	184021082	DHS_23377:::chr1:::184020582	73.9405	75.3884	1.01958	0.027978	0.964019	1	2.60599	5.60166	1.91469	2.83341	0.559405	2.43845	0.202078	1.25886	0.0612614	0.0142341	4.12048	3.48511	4.4038
chr1	184022182	184023182	DHS_23378:::chr1:::184022682	23.3532	26.6152	1.13968	0.188631	0.692898	0.971323	2.76404	2.01	0.590152	2.28107	0.570376	1.55014	0.350627	0.392103	0.00612614	0	3.50338	4.59594	2.55736
chr1	184024285	184025285	p300_5073:::chr1:::184024785	116.181	101.323	0.872114	-0.197412	0.374227	0.708222	3.16474	5.81816	2.60901	3.06615	0.386471	1.8916	0.302892	1.97083	0.085766	0	13.1165	10.6234	5.99453
chr1	184033254	184034254	p300_5076:::chr1:::184033754	213.835	247.821	1.15894	0.212804	0.191494	0.470093	3.2347	5.17149	1.94884	5.52556	0.401335	3.61242	0.331096	3.63211	0.0918921	0.0711703	11.2521	8.62361	7.18008
chr1	184035618	184036618	DHS_23383:::chr1:::184036118	9.23591	11.7553	1.27278	0.347982	0.674679	0.95615	4.35803	1.0706	0.648172	1.50255	0.616301	1.11233	0.511694	0.154777	0.0306307	0.113873	1.8574	2.22476	1.54341
chr1	184045535	184046535	p300_5078:::chr1:::184046035	16.3356	22.4388	1.37361	0.457974	0.518875	0.850774	2.36202	2.17748	1.16682	1.52947	0.607542	1.77849	0.354872	0.278599	0.0183784	0.0427022	3.13275	1.28933	2.42133
chr1	184067993	184068993	DHS_23395:::chr1:::184068493	6.6285	8.47194	1.27811	0.354011	0.76907	1	1.56115	1.38328	0.753095	0.888687	1.44094	1.52165	0.517855	0.113503	0.00612614	0	2.09311	2.17775	1.76739
chr1	184092902	184093902	p300_5083:::chr1:::184093402	65.676	53.5961	0.816068	-0.293238	0.325724	0.655577	5.82916	1.87067	0.66054	2.72394	0.530002	1.09699	0.608532	1.1144	0.00612614	0.0711703	14.3357	9.19423	11.2257
chr1	184157187	184158187	DHS_23423:::chr1:::184157687	3.54986	17.0205	4.79468	2.26144	0.00594749	0.0353271	1.59063	1.13351	0.694045	0.767047	0.628413	1.15263	1.13065	0.061911	0	0	1.17156	1.20758	1.74927
chr1	184174992	184175992	DHS_23427:::chr1:::184175492	1.22034	4.77183	3.91025	1.96726	0.244083	0.548847	2.82055	0.566809	0.431737	1.28323	0.775861	0.481966	0.864609	0.020637	0	0	0.907718	0.661554	1.98782
chr1	184201469	184202469	p300_5088:::chr1:::184201969	245.757	198.079	0.805994	-0.311159	0.047698	0.176341	3.52769	5.36151	2.27261	3.47671	0.351453	2.86138	0.497148	4.17899	0.0735137	0.170809	5.12473	4.05217	2.59952
chr1	184217644	184218644	DHS_23437:::chr1:::184218144	4.29897	5.682	1.32171	0.402406	0.80121	1	1.55972	0.786662	0.404459	0.907717	0.82042	0.944345	0.55564	0.0722294	0.042883	0.0427022	1.76372	0.88143	1.30418
chr1	184219627	184220627	DHS_23438:::chr1:::184220127	7.26646	13.6606	1.87995	0.910694	0.230956	0.52861	2.85557	0.967496	0.479011	0.78382	0.677721	1.45953	0.433762	0.123822	0.0612614	0	0.984729	1.05695	1.65745
chr1	184227064	184228064	p300_5091:::chr1:::184227564	4.2434	5.23968	1.23478	0.304258	0.894643	1	3.6294	0.997405	0.487322	1.11639	0.427032	0.634901	1.31028	0.0722294	0	0	5.46444	2.38952	2.48035
chr1	184272615	184273615	DHS_23460:::chr1:::184273115	3.60544	13.3459	3.70159	1.88815	0.0330611	0.13459	1.90457	0.880609	0.528962	0.872934	0.768146	0.783126	0.410327	0.061911	0.00612614	0.0142341	0.988561	0.707373	1.18083
chr1	184449820	184450820	p300_5104:::chr1:::184450320	53.1391	80.492	1.51474	0.599071	0.0379782	0.148748	1.89955	3.30906	1.34949	1.77964	2.48388	1.4925	0.457636	0.908027	0.0245046	0	2.25654	3.04733	4.04314
chr1	184458423	184459423	p300_5106:::chr1:::184458923	114.765	109.982	0.958324	-0.0614144	0.813483	1	3.27533	7.03397	3.13038	2.72624	1.23151	2.14128	0.306635	1.96051	0.0490091	0.0142341	7.37378	5.75604	4.51316
chr1	184492840	184493840	DHS_23522:::chr1:::184493340	12.8969	30.7321	2.3829	1.25272	0.0124752	0.0636327	2.47663	3.14442	1.66802	1.23096	1.45335	1.45381	0.77899	0.216688	0	0.0142341	1.84204	1.95179	4.52756
chr1	184572930	184573930	DHS_23538:::chr1:::184573430	0.637958	2.44973	3.83995	1.94109	0.513728	0.847776	1.66336	0.69029	0.64081	1.12348	1.06541	0.913741	2.78979	0.0103185	0	0	0.855421	1.23441	2.29904
chr1	184576781	184577781	p300_5113:::chr1:::184577281	2.3851	6.83029	2.86373	1.5179	0.23452	0.534524	2.77437	1.75028	0.640081	2.1275	1.37639	0.698382	2.1264	0.041274	0	0	2.48447	3.01784	3.02264
chr1	184600376	184601376	DHS_23548:::chr1:::184600876	7.26646	6.43901	0.886129	-0.174412	0.927617	1	1.54688	1.44618	0.698843	0.98743	0.759606	0.946804	0.69816	0.123822	0.00612614	0	2.26839	1.44282	2.09377
chr1	184667952	184668952	DHS_23556:::chr1:::184668452	0	0	NA	NA	NA	NA	2.0632	0.52464	0.304396	0.622616	1.0211	0.479732	1.04956	0	0	0	1.25153	0.447771	0.475664
chr1	185338214	185339214	p300_5129:::chr1:::185338714	2.3851	12.6399	5.29953	2.40586	0.019405	0.0895439	3.0163	1.4639	0.952439	1.09285	1.10793	0.903074	0.825251	0.041274	0	0	2.17071	2.39204	2.38547
chr1	185462945	185463945	DHS_23623:::chr1:::185463445	0	0.808067	Inf	Inf	0.844589	1	2.18152	1.62776	0.863475	1.17284	1.0468	0.793827	1.22173	0	0	0	1.51286	0.661554	1.32521
chr1	185520580	185521580	DHS_23629:::chr1:::185521080	0.637958	2.05846	3.22663	1.69003	0.637258	0.933728	2.08043	0.75906	0.677548	0.900813	0.667941	0.683407	0.915597	0.0103185	0	0	1.4182	1.99337	1.45203
chr1	185540632	185541632	DHS_23632:::chr1:::185541132	0	0.391271	Inf	Inf	1	1	4.31215	0.322733	0.486849	0.746856	0.769144	0.354129	0.86085	0	0	0	2.09967	1.65268	1.00322
chr1	185841421	185842421	DHS_23652:::chr1:::185841921	15.8644	46.7403	2.94624	1.55887	0.000239979	0.00246541	3.6117	1.4867	0.470501	1.47563	0.551155	0.69208	0.939507	0.268281	0.00612614	0.0284681	3.98618	1.84563	3.36103
chr1	185842737	185843737	p300_5130:::chr1:::185843237	12.6746	38.0131	2.99915	1.58455	0.0200213	0.0917484	3.24674	3.01859	0.86222	2.09427	0.552015	1.15755	0.825816	0.216688	0.00612614	0.0284681	5.72933	3.75803	3.04757
chr1	185847562	185848562	p300_5132:::chr1:::185848062	11.2054	28.8778	2.57715	1.36577	0.0484094	0.178197	2.0264	1.07445	0.559538	1.82869	0.932662	0.869057	1.91488	0.185733	0	0.0427022	6.91073	4.17508	2.76971
chr1	186262646	186263646	DHS_23684:::chr1:::186263146	1.80272	2.78995	1.54763	0.630063	0.851515	1	1.89769	0.924496	0.660175	0.945232	0.801465	0.665884	1.2692	0.0309555	0.00612614	0	1.48054	1.42432	2.18114
chr1	186264859	186265859	p300_5140:::chr1:::186265359	12.7858	29.0649	2.27322	1.18474	0.0214652	0.0968518	2.54756	3.60284	1.43982	1.80997	1.37587	1.19762	0.877566	0.216688	0.0245046	0	3.02719	1.765	2.87938
chr1	186320444	186321444	p300_5141:::chr1:::186320944	7.84884	20.8311	2.65403	1.40819	0.0271096	0.115577	3.32451	1.23991	0.460414	1.90826	0.707813	0.407364	0.970566	0.13414	0.042883	0	5.88731	6.65393	6.16684
chr1	186451817	186452817	p300_5142:::chr1:::186452317	10.3451	33.9899	3.2856	1.71616	0.000861057	0.00720179	2.37244	2.45888	0.991445	1.91001	0.631387	0.847884	0.859244	0.175414	0.0183784	0	6.11882	3.95698	6.89712
chr1	186468140	186469140	DHS_23705:::chr1:::186468640	1.22034	8.91427	7.30475	2.86883	0.0264434	0.113471	2.03542	1.31449	0.986601	0.955899	0.758371	0.900203	0.804786	0.020637	0	0	2.71722	0.891152	1.91265
chr1	186595162	186596162	p300_5145:::chr1:::186595662	29.7594	44.078	1.48115	0.566714	0.140566	0.381671	1.67102	4.8777	2.63377	0.901313	1.19743	2.14993	0.508043	0.505606	0.0367568	0	2.49895	2.3842	3.43725
chr1	186675861	186676861	p300_5156:::chr1:::186676361	42.8786	44.3161	1.03352	0.0475729	0.900494	1	1.66043	4.76555	2.52571	0.942247	1.14548	1.51878	0.331947	0.722294	0.0306307	0.0284681	3.08743	3.50504	6.20564
chr1	186903480	186904480	p300_5166:::chr1:::186903980	1.8583	1.22486	0.659132	-0.60136	0.950735	1	3.13066	1.15468	0.453985	1.08335	0.615838	1.27197	0.790577	0.0309555	0.00612614	0	3.86511	3.95744	0.900848
chr1	186922540	186923540	p300_5169:::chr1:::186923040	42.5451	68.3455	1.60642	0.683853	0.0278765	0.118078	4.01631	5.04564	1.9997	1.65819	0.941435	1.96853	0.420386	0.722294	0.0306307	0	5.52158	5.91849	4.10208
chr1	186928607	186929607	p300_5170:::chr1:::186929107	462.395	385.516	0.833738	-0.262335	0.0362581	0.14376	3.42757	4.50561	2.73985	5.45508	0.295987	3.07775	0.284243	7.84205	0.232793	0.113873	7.84405	9.64714	6.34405
chr1	186972810	186973810	DHS_23843:::chr1:::186973310	1.8583	4.40608	2.37103	1.24552	0.447228	0.785719	1.86729	0.483833	0.272213	0.96046	0.975265	0.686418	0.796381	0.0309555	0	0	2.95064	4.27125	1.15458
chr1	187014575	187015575	p300_5175:::chr1:::187015075	2.3851	3.18122	1.33379	0.41553	0.926817	1	2.00523	0.959215	0.404754	0.496733	1.05295	0.793827	0.479294	0.041274	0	0.0142341	5.95059	4.36625	1.56616
chr1	187305676	187306676	DHS_23918:::chr1:::187306176	41.4359	78.357	1.89104	0.91918	0.0020767	0.0150249	2.21856	3.10822	1.74013	1.09866	1.06162	2.388	0.46382	0.701657	0.00612614	0.0142341	2.19017	2.69906	2.69543
chr1	187310665	187311665	p300_5189:::chr1:::187311165	58.9363	97.2062	1.64934	0.721891	0.00586712	0.0349565	3.61537	3.06437	1.54481	2.14826	0.636263	1.52412	0.761118	1.00089	0.134775	0.0854044	3.37996	1.93988	3.61678
chr1	187312131	187313131	DHS_23922:::chr1:::187312631	48.12	77.3703	1.60786	0.685142	0.0178031	0.0839281	4.61005	3.9856	1.67831	2.60064	0.70795	1.87023	0.309977	0.815161	0.0918921	0.0284681	3.0415	3.49126	1.24886
chr1	187357158	187358158	p300_5190:::chr1:::187357658	3.54986	41.8919	11.801	3.56084	5.34935e-09	2.13241e-07	2.26561	1.82031	0.882749	3.0566	0.840303	1.11298	0.790577	0.061911	0.0122523	0	4.43073	1.97872	5.17988
chr1	188046901	188047901	DHS_23977:::chr1:::188047401	1.80272	5.75857	3.19438	1.67554	0.356105	0.689903	1.95481	1.03444	0.751529	0.654728	0.838436	0.906592	0.697987	0.0309555	0	0	2.80902	1.77427	1.92622
chr1	188057976	188058976	p300_5196:::chr1:::188058476	12.7302	13.6606	1.07308	0.101764	0.944335	1	2.9338	1.87049	0.790368	1.37169	0.464567	0.65427	0.725717	0.216688	0	0.0284681	4.56556	4.81498	1.87131
chr1	188059832	188060832	p300_5197:::chr1:::188060332	17.7227	14.9875	0.845669	-0.241835	0.714446	0.989482	4.42507	2.38093	0.736756	2.12677	0.596579	0.948885	0.629083	0.299236	0.00612614	0.0427022	9.50505	5.12755	3.34245
chr1	188079197	188080197	p300_5198:::chr1:::188079697	11.3431	15.3533	1.35353	0.436729	0.564551	0.882849	4.75675	1.78935	0.686582	1.17784	0.530682	0.930806	0.308548	0.196051	0.00612614	0	4.38748	2.06338	2.07655
chr1	188085066	188086066	p300_5199:::chr1:::188085566	4.18782	7.24708	1.73051	0.791201	0.503518	0.837986	4.19447	1.09535	0.391091	1.30657	0.416484	1.17794	0.65381	0.0722294	0	0.0142341	8.28351	6.64792	2.03712
chr1	188097639	188098639	DHS_23989:::chr1:::188098139	0	0	NA	NA	NA	NA	4.68994	0.469861	0.545227	0.706303	0.597217	0.763808	0.734255	0	0	0	1.35861	1.42584	0.811426
chr1	188099007	188100007	DHS_23990:::chr1:::188099507	0.582381	0.782542	1.34369	0.426206	1	1	5.35043	0.501736	0.310515	0.682766	0.538529	0.58725	0.3677	0.0103185	0	0	1.50881	1.82708	1.1784
chr1	188334065	188335065	p300_5202:::chr1:::188334565	5.63047	16.5781	2.94436	1.55796	0.0313005	0.128835	4.73614	1.61298	0.653776	1.94116	0.317633	0.598273	0.558231	0.0928664	0.00612614	0	34.2898	16.3388	5.08457
chr1	188337471	188338471	p300_5203:::chr1:::188337971	36.9436	64.9856	1.75905	0.814795	0.00995018	0.0533229	5.69218	2.64873	0.684207	3.32378	0.468406	1.10078	0.327659	0.61911	0.0245046	0.0284681	33.8853	13.4197	5.48906
chr1	188338992	188339992	DHS_24015:::chr1:::188339492	15.2264	39.204	2.57473	1.36442	0.00258737	0.0180095	3.56298	1.32678	0.730653	1.44111	0.528786	1.07475	0.472595	0.257962	0	0	3.27719	2.45669	1.25826
chr1	188387906	188388906	p300_5204:::chr1:::188388406	16.4468	28.6736	1.74342	0.801919	0.103113	0.307898	2.70534	2.37908	0.58738	1.56187	0.820322	1.08618	0.720103	0.278599	0.00612614	0	5.00568	3.8018	1.83574
chr1	188391010	188392010	p300_5205:::chr1:::188391510	3.13421	4.01481	1.28096	0.357229	0.873989	1	3.84468	2.40369	0.980832	1.46704	1.60035	0.901718	0.546572	0.0515925	0	0	4.30766	3.1261	3.88647
chr1	188433528	188434528	p300_5206:::chr1:::188434028	44.1255	64.3307	1.4579	0.543893	0.0898316	0.27894	2.29994	3.8942	1.78652	2.09577	0.633105	1.5458	0.270846	0.75325	0.0245046	0.0142341	6.20617	3.09175	3.4251
chr1	188580802	188581802	DHS_24060:::chr1:::188581302	15.1709	26.0452	1.71679	0.779715	0.128995	0.359523	2.22726	1.79033	0.532693	1.07868	1.24964	1.00744	0.846008	0.257962	0.0122523	0	0.955712	2.0896	3.32964
chr1	188657136	188658136	p300_5215:::chr1:::188657636	43.1275	73.1768	1.69675	0.762778	0.0112975	0.0587231	2.32092	10.3105	9.95646	0.768847	2.82438	3.23655	0.555593	0.732613	0.0245046	0	4.31772	3.05689	3.52019
chr1	188741969	188742969	DHS_24088:::chr1:::188742469	0.582381	2.00741	3.44689	1.7853	0.646409	0.935943	2.17677	0.685214	0.636098	1.1307	0.953889	0.381904	0.749024	0.0103185	0	0	2.71722	2.82198	2.23142
chr1	188746335	188747335	p300_5219:::chr1:::188746835	2.32952	22.7535	9.76745	3.28798	6.99371e-05	0.000863767	7.27173	4.18566	1.8079	1.4764	1.19458	0.708774	0.310132	0.041274	0	0	14.0192	11.511	5.90321
chr1	188753733	188754733	p300_5221:::chr1:::188754233	1.8583	3.23227	1.73937	0.798567	0.727643	0.998611	4.85572	0.722153	0.408063	1.11785	0.877985	0.612488	0.548183	0.0309555	0	0	3.26835	1.42921	1.36641
chr1	188778098	188779098	p300_5222:::chr1:::188778598	0.637958	4.04034	6.33324	2.66294	0.206433	0.490245	2.00244	1.17543	0.343291	1.01564	0.738622	0.618321	0.734456	0.0103185	0.00612614	0	7.05723	7.33432	2.84643
chr1	188779689	188780689	p300_5223:::chr1:::188780189	4.88136	10.4028	2.13112	1.09161	0.225167	0.519695	1.75242	0.724124	0.336109	0.978341	1.1269	0.787777	0.945494	0.0825479	0	0	5.79825	2.53549	2.19323
chr1	188798944	188799944	DHS_24097:::chr1:::188799444	2.96748	26.326	8.8715	3.14918	1.83424e-05	0.000274316	2.06809	2.00509	0.835717	1.20434	0.733944	0.957891	0.679154	0.0515925	0.0245046	0	1.70383	2.98024	2.93976
chr1	188800337	188801337	p300_5228:::chr1:::188800837	23.8244	47.2592	1.98365	0.988155	0.0106711	0.0560761	2.20134	1.95447	0.518393	2.5872	0.50631	0.849673	0.592196	0.402421	0.0183784	0.0142341	7.28543	6.60888	4.99926
chr1	189201752	189202752	p300_5238:::chr1:::189202252	1.22034	13.6861	11.215	3.48736	0.00148441	0.0113602	1.72182	1.30429	0.688902	0.928718	0.819381	0.943148	0.814318	0.020637	0	0	2.73099	2.45669	1.49127
chr1	189265324	189266324	p300_5240:::chr1:::189265824	8.37564	12.5378	1.49694	0.582014	0.485173	0.817253	2.30534	1.06434	0.564601	1.39543	1.0021	0.230693	1.0706	0.144459	0.0245046	0	8.32407	4.46028	4.06125
chr1	189273682	189274682	p300_5241:::chr1:::189274182	3.71659	9.59471	2.58159	1.36826	0.156366	0.40974	2.89411	1.17465	0.567945	0.906112	1.2131	0.763808	0.585505	0.061911	0.0183784	0	3.82109	2.67345	2.18071
chr1	189275677	189276677	p300_5242:::chr1:::189276177	11.5654	24.2675	2.09828	1.06921	0.0561653	0.199051	1.74912	1.99079	1.06146	1.05649	0.843463	0.856356	0.706372	0.196051	0.0122523	0	3.32985	3.25298	4.01979
chr1	189401611	189402611	DHS_24172:::chr1:::189402111	0.582381	0	0	#NAME?	0.903996	1	2.35325	0.624035	0.475326	0.470928	1.15248	0.4682	1.39681	0.0103185	0	0	1.22144	2.47637	1.19373
chr1	189427709	189428709	p300_5243:::chr1:::189428209	3.02306	3.62354	1.19863	0.261391	0.987181	1	2.31364	4.5779	2.7599	0.911714	5.49548	0.872492	0.901681	0.0515925	0	0	5.20353	3.47303	3.43493
chr1	190836849	190837849	p300_5261:::chr1:::190837349	432.193	304.48	0.704499	-0.50533	0.000122643	0.00139624	3.18979	7.10473	3.63391	5.91844	0.591802	3.12845	0.278773	7.31581	0.177658	0.0427022	11.7875	10.5184	8.11216
chr1	190846427	190847427	p300_5262:::chr1:::190846927	0	3.28332	Inf	Inf	0.145551	0.391287	2.02281	0.631207	0.346251	0.830803	0.480162	0.867515	0.964746	0	0.0122523	0	2.19017	1.959	2.14049
chr1	190850490	190851490	DHS_24355:::chr1:::190850990	4.82578	6.43901	1.3343	0.416078	0.775072	1	1.94637	1.18864	0.816543	1.1962	0.589219	1.73903	0.353563	0.0825479	0	0	2.06218	1.51496	1.62575
chr1	190965962	190966962	p300_5265:::chr1:::190966462	9.29148	19.7594	2.12661	1.08856	0.075354	0.246884	2.53156	4.22467	1.95572	1.26604	0.887839	1.55205	0.775345	0.154777	0.0122523	0	5.91018	6.93718	3.85496
chr1	191002590	191003590	p300_5267:::chr1:::191003090	0	1.61613	Inf	Inf	0.477961	0.811819	2.09761	0.639534	0.387717	0.941737	0.497681	0.381904	0.641418	0	0	0	2.89837	2.25758	1.56876
chr1	191432292	191433292	p300_5272:::chr1:::191432792	15.8088	30.2642	1.91439	0.936884	0.05458	0.194865	2.77008	1.87356	0.669778	1.96657	0.774074	1.08963	0.586943	0.268281	0.0245046	0	3.95707	4.23764	2.45981
chr1	191451957	191452957	p300_5274:::chr1:::191452457	8.20891	20.8566	2.54073	1.34524	0.153289	0.404045	1.5455	1.08074	0.592842	1.3292	0.593177	0.74267	0.412954	0.144459	0.00612614	0	3.23861	2.45971	6.15905
chr1	191516014	191517014	p300_5277:::chr1:::191516514	32.5601	33.0287	1.01439	0.020613	1	1	3.80796	1.3097	0.514937	1.30194	0.554899	0.811546	0.418469	0.557199	0.0367568	0.0427022	7.05723	4.06794	0.319311
chr1	191747507	191748507	p300_5309:::chr1:::191748007	32.7268	40.1652	1.22729	0.295474	0.4762	0.811819	3.90235	5.29181	3.39858	1.23231	3.05991	3.39767	0.308471	0.557199	0.0735137	0.0427022	6.08204	4.84786	3.3566
chr1	191751232	191752232	p300_5310:::chr1:::191751732	11.5654	14.8089	1.28044	0.356642	0.610449	0.92486	1.53507	1.08785	0.519936	0.930549	0.86705	1.02953	0.327346	0.196051	0	0	3.96151	3.13778	3.21419
chr1	191753476	191754476	DHS_24529:::chr1:::191753976	1.22034	3.64907	2.99021	1.58025	0.436914	0.77694	3.06373	1.42636	0.993092	1.01564	0.698753	0.782562	0.326662	0.020637	0.00612614	0	2.99016	2.70528	1.41637
chr1	191830133	191831133	DHS_24540:::chr1:::191830633	2.44068	8.49747	3.4816	1.79975	0.112851	0.327203	2.55163	1.95923	1.11926	0.965818	1.4367	1.29847	0.79588	0.041274	0	0	2.44037	2.17239	2.96706
chr1	192271448	192272448	p300_5320:::chr1:::192271948	24.0733	30.4174	1.26353	0.337462	0.499325	0.833324	1.72198	3.88124	2.05363	3.01913	1.41428	0.770608	0.90683	0.41274	0.0183784	0	9.66347	6.83304	3.56112
chr1	192455781	192456781	p300_5325:::chr1:::192456281	1.74714	2.81547	1.61147	0.68838	0.852979	1	2.9887	1.18558	0.636488	0.881482	0.762542	0.613013	1.45938	0.0309555	0	0	3.17203	2.21067	1.71688
chr1	192458417	192459417	p300_5326:::chr1:::192458917	0.582381	1.25039	2.14703	1.10234	0.970562	1	2.15203	0.897305	0.363485	1.16168	1.0161	0.763808	1.4453	0.0103185	0	0	5.09479	3.41608	1.96095
chr1	192531409	192532409	DHS_24619:::chr1:::192531909	1.16476	2.86652	2.46104	1.29927	0.636096	0.933728	2.78667	0.844465	0.399652	0.927496	0.722587	0.613707	0.599597	0.020637	0.0122523	0.0142341	1.14907	1.65816	1.30393
chr1	192742753	192743753	p300_5334:::chr1:::192743253	22.5485	22.4217	0.994377	-0.00813535	1	1	2.36595	1.26788	0.769576	1.169	0.563006	1.07017	0.457228	0.381784	0.0612614	0.0284681	2.70727	3.32958	1.86955
chr1	192911158	192912158	p300_5347:::chr1:::192911658	163.968	129.189	0.787891	-0.343932	0.070339	0.234229	2.06751	1.46764	1.1157	1.14103	0.455344	1.78089	0.508141	2.78599	0.220541	0.156575	2.40587	0.736438	1.24531
chr1	192959042	192960042	DHS_24733:::chr1:::192959542	1.80272	10.4538	5.79892	2.53578	0.0232984	0.102976	1.86666	0.85234	0.577734	1.64411	1.11203	0.950103	1.32102	0.0309555	0	0	0.563326	0.615837	1.85045
chr1	192962476	192963476	DHS_24735:::chr1:::192962976	1.8583	24.3441	13.1002	3.71152	6.75351e-06	0.000115287	2.37589	1.13713	0.772405	1.4614	0.669796	0.784495	2.66326	0.0309555	0.00612614	0	2.30964	3.40866	2.8738
chr1	192989796	192990796	DHS_24747:::chr1:::192990296	4.7702	2.47525	0.518899	-0.946475	0.489079	0.821929	1.63516	0.800156	0.753566	1.07895	0.63872	0.633402	0.97483	0.0825479	0	0	1.36808	0.844576	1.39384
chr1	193010025	193011025	DHS_24754:::chr1:::193010525	96.878	89.5168	0.924016	-0.11401	0.654863	0.942918	3.16559	4.46514	2.30282	2.10979	4.84776	1.71382	0.741882	1.64064	0.0551353	0.0284681	1.93665	2.72881	2.1848
chr1	193013516	193014516	p300_5351:::chr1:::193014016	27.2631	37.2816	1.36747	0.451514	0.282279	0.597726	2.86326	1.96325	0.833156	1.37575	1.37049	1.86017	0.562213	0.464332	0	0	5.96873	4.17039	2.86734
chr1	193080414	193081414	p300_5355:::chr1:::193080914	8.48679	14.205	1.67378	0.743106	0.318933	0.64625	1.62354	2.9616	1.37913	2.14315	0.907367	1.12911	0.910755	0.144459	0.0183784	0	3.28035	2.01994	3.03873
chr1	193242400	193243400	p300_5368:::chr1:::193242900	42.823	106.588	2.48904	1.31559	1.32631e-06	2.78507e-05	2.45579	4.63727	1.52421	2.2961	0.540537	3.24618	0.451946	0.722294	0.0122523	0.0284681	2.84855	2.01994	3.40258
chr1	193256167	193257167	p300_5369:::chr1:::193256667	33.865	32.1695	0.949935	-0.074099	0.942231	1	2.8052	4.25327	1.91497	2.18055	0.711806	2.53057	0.440051	0.567517	0.287929	0.0142341	6.8625	4.0657	4.36303
chr1	193259003	193260003	p300_5370:::chr1:::193259503	11.5099	10.5304	0.914903	-0.128309	0.907395	1	1.8288	3.23884	0.974578	1.50566	0.913251	1.52505	0.700524	0.196051	0.0183784	0.0142341	8.13798	2.94858	4.44378
chr1	193262443	193263443	p300_5371:::chr1:::193262943	9.18033	9.69681	1.05626	0.0789641	0.996267	1	2.08253	2.31564	0.670235	2.26534	0.492415	1.13359	0.49533	0.154777	0.0122523	0	3.36058	2.48485	2.4815
chr1	193269458	193270458	p300_5372:::chr1:::193269958	7.95999	19.3426	2.42997	1.28094	0.0474692	0.1757	1.63305	2.75733	1.03987	1.57477	0.470032	1.51279	0.494501	0.13414	0.0122523	0.0569363	2.09288	1.37278	2.81242
chr1	193295528	193296528	DHS_24844:::chr1:::193296028	0.582381	0.416796	0.715676	-0.482621	1	1	1.6688	0.707567	0.53521	0.883244	0.63843	0.715694	0.499903	0.0103185	0	0	1.45489	2.62434	1.19478
chr1	193349067	193350067	DHS_24860:::chr1:::193349567	14.0061	22.7025	1.6209	0.696793	0.211473	0.497994	2.12349	0.662625	0.419405	0.972239	0.618911	0.616922	0.603764	0.237325	0.00612614	0	0.940576	0.548401	0.873843
chr1	193448696	193449696	p300_5380:::chr1:::193449196	127.275	143.181	1.12497	0.169888	0.413052	0.752149	1.95414	0.970721	0.499792	0.991302	0.311051	0.970673	0.474734	2.15656	0.0367568	0.0427022	2.83044	1.93083	1.48761
chr1	193457682	193458682	DHS_24901:::chr1:::193458182	0.582381	0.808067	1.38752	0.472512	1	1	2.16022	0.857091	0.45466	0.77145	0.726271	0.825117	0.647797	0.0103185	0.00612614	0	0.772454	0.709345	1.10723
chr1	193484680	193485680	p300_5381:::chr1:::193485180	36.9147	78.272	2.12035	1.0843	0.00177052	0.0131726	4.2847	2.36633	0.616344	2.12537	0.771767	1.37818	0.363274	0.629428	0.00612614	0	6.55677	6.89674	3.03403
chr1	193489924	193490924	p300_5383:::chr1:::193490424	69.1703	66.5678	0.962376	-0.0553271	0.837359	1	2.65389	3.53774	1.62491	1.615	0.966177	1.49084	1.06809	1.17631	0.0122523	0	7.52771	8.86531	7.97001
chr1	193521928	193522928	p300_5384:::chr1:::193522428	3.02306	5.23968	1.73324	0.793469	0.596123	0.911811	4.98965	1.34121	0.484194	1.60347	0.64191	1.09014	0.369395	0.0515925	0.00612614	0	2.75778	3.27864	2.72797
chr1	193625967	193626967	p300_5388:::chr1:::193626467	29.3147	42.751	1.45834	0.544332	0.298492	0.61735	2.24099	4.26876	1.82307	5.2205	0.464193	1.41138	0.969125	0.505606	0.0122523	0	7.4597	4.23435	3.3843
chr1	193638640	193639640	p300_5391:::chr1:::193639140	16.5024	27.1425	1.64476	0.717879	0.298443	0.617298	3.35313	3.40407	1.14729	1.17334	0.58333	1.54379	0.38556	0.278599	0	0	4.43872	4.34255	1.88716
chr1	193641383	193642383	p300_5392:::chr1:::193641883	62.2929	60.8093	0.976183	-0.0347758	0.932671	1	2.66214	4.85688	1.54076	1.56745	0.388609	2.84574	0.225945	1.05249	0.0306307	0.0569363	5.6377	5.0101	5.06875
chr1	193662661	193663661	p300_5395:::chr1:::193663161	18.4718	33.9133	1.83595	0.876526	0.0493841	0.181	1.63051	1.76143	0.757344	1.0738	0.577393	1.22975	0.641441	0.309555	0.00612614	0	5.27549	2.78516	2.15175
chr1	193703490	193704490	DHS_24953:::chr1:::193703990	9.81829	36.8903	3.75731	1.9097	0.000528808	0.0047915	1.54897	1.69569	0.743073	0.919935	0.91924	0.965637	1.31443	0.165096	0.00612614	0.0142341	1.68107	1.63002	1.13497
chr1	193749081	193750081	DHS_24975:::chr1:::193749581	0.637958	6.41349	10.0532	3.32958	0.048011	0.177159	1.88066	0.528088	0.501636	0.664602	0.790903	0.527056	0.643255	0.0103185	0	0	1.10794	2.1243	2.23966
chr1	193752636	193753636	p300_5400:::chr1:::193753136	46.095	98.6181	2.13945	1.09724	6.55857e-05	0.000818045	2.62201	2.43088	1.2722	1.45598	1.56908	4.16912	0.928368	0.784205	0.0122523	0.0711703	2.77383	2.00509	2.40047
chr1	193754023	193755023	DHS_24981:::chr1:::193754523	67.1186	108.621	1.61835	0.694521	0.00472219	0.0293765	3.77337	2.78501	1.04515	2.03463	1.32223	3.44847	0.734405	1.13503	0.0183784	0.0711703	3.63237	5.66423	2.94714
chr1	193769840	193770840	p300_5403:::chr1:::193770340	195.919	253.674	1.29479	0.372718	0.0223179	0.0997878	2.74892	4.00063	1.65939	2.48903	0.685213	3.53676	0.831128	3.32255	0.0612614	0.113873	15.1219	11.7787	7.05588
chr1	193771268	193772268	DHS_24988:::chr1:::193771768	116.93	184.792	1.58036	0.660256	0.000586904	0.0052184	2.56708	3.23144	1.50888	1.46048	0.963293	4.26534	0.882121	1.98115	0.0612614	0.128107	3.02133	5.72513	5.41344
chr1	193787810	193788810	p300_5404:::chr1:::193788310	84.3967	120.844	1.43186	0.517891	0.0252888	0.109643	2.89294	2.54406	0.922033	1.68742	0.361753	2.29442	0.467608	1.43427	0.0245046	0.0142341	9.55295	5.0763	4.83882
chr1	194616343	194617343	DHS_25107:::chr1:::194616843	10.983	23.9018	2.17624	1.12184	0.0482738	0.177878	3.03527	0.625599	0.836288	1.2948	0.763361	1.17156	0.404535	0.185733	0.104144	0	1.64974	2.05032	2.54104
chr1	194617723	194618723	p300_5436:::chr1:::194618223	50.0339	88.9469	1.77773	0.830038	0.00251894	0.0176098	4.06387	3.68387	1.32075	3.37686	0.699666	2.2302	0.451782	0.846116	0.147027	0.0711703	4.31955	6.24486	4.42258
chr1	194620915	194621915	DHS_25109:::chr1:::194621415	48.5912	104.368	2.14788	1.10292	4.09081e-05	0.000545763	2.36448	2.63402	1.81846	1.59794	0.616414	1.13153	0.645638	0.825479	0.379821	0.0996385	2.96953	4.15531	1.97061
chr1	194622254	194623254	p300_5437:::chr1:::194622754	76.0767	110.373	1.45082	0.536867	0.024431	0.106828	2.38426	4.08214	1.95976	1.69748	0.921811	2.60535	0.633797	1.28981	0.0306307	0	2.84033	1.96111	2.23208
chr1	194640577	194641577	p300_5438:::chr1:::194641077	1.22034	0.833592	0.683083	-0.549868	1	1	1.8264	1.2046	0.668649	0.966797	0.910249	0.750983	0.682577	0.020637	0	0	2.06833	1.24362	2.16178
chr1	194649148	194650148	p300_5441:::chr1:::194649648	5.51931	22.8385	4.13792	2.04891	0.00192755	0.0141015	2.71459	1.88927	0.672987	1.04283	0.851643	1.99271	0.688964	0.0928664	0	0	3.12525	1.79995	2.41285
chr1	194651658	194652658	DHS_25118:::chr1:::194652158	40.9091	62.5359	1.52865	0.612261	0.053398	0.191752	1.57587	3.67095	2.46348	0.976276	1.03532	1.40201	0.500494	0.691339	0.0122523	0	3.60641	3.62382	2.6122
chr1	194660580	194661580	p300_5442:::chr1:::194661080	27.2631	48.9858	1.79678	0.845414	0.0236681	0.104154	2.57548	12.0782	12.0651	1.07826	4.95835	3.44847	0.70886	0.464332	0.104144	0.0142341	10.0747	6.11378	2.25129
chr1	194695610	194696610	DHS_25132:::chr1:::194696110	17.945	16.5781	0.92383	-0.1143	0.928982	1	2.3939	0.795129	0.506149	0.959795	1.03953	0.664748	0.690443	0.299236	0.0306307	0.0854044	1.34006	1.13751	2.16565
chr1	195208698	195209698	p300_5468:::chr1:::195209198	65.1492	55.7056	0.855047	-0.225925	0.451384	0.788981	1.87965	4.63466	4.32016	1.41239	0.840402	1.91609	0.302161	1.10408	0.0612614	0.0142341	2.11772	2.08361	3.39915
chr1	195276105	195277105	p300_5470:::chr1:::195276605	1.16476	6.85581	5.88602	2.55729	0.0839319	0.264805	2.03786	0.885382	0.455521	1.04313	0.732166	1.12368	0.303505	0.020637	0	0	2.96107	1.16535	1.32637
chr1	195292142	195293142	DHS_25236:::chr1:::195292642	0	1.19934	Inf	Inf	0.639786	0.933728	2.70428	0.717123	0.341395	0.680836	0.677781	0.789128	4.04267	0	0	0	3.0625	3.68277	1.52423
chr1	195303153	195304153	p300_5471:::chr1:::195303653	10.5118	24.6843	2.34825	1.23158	0.0272955	0.116155	1.80219	1.09807	0.48341	1.68736	0.623512	0.706652	1.0175	0.175414	0.0122523	0	5.65625	6.80185	3.70662
chr1	195322704	195323704	DHS_25243:::chr1:::195323204	7.73768	23.434	3.02855	1.59863	0.0107277	0.0563057	2.96065	1.3632	0.866462	1.35252	0.832529	0.886412	0.508251	0.13414	0.0183784	0	2.13066	3.46596	3.41038
chr1	195340143	195341143	p300_5479:::chr1:::195340643	151.155	156.323	1.03419	0.0484964	0.81319	1	3.79274	4.42326	1.43518	3.06804	0.586782	2.59695	0.479021	2.55899	0.085766	0.0569363	5.0663	4.496	4.13827
chr1	195364326	195365326	p300_5480:::chr1:::195364826	28.7057	29.1415	1.01518	0.0217342	1	1	4.59759	2.37727	0.823899	2.33723	0.61328	1.60763	0.553404	0.484969	0	0	11.8781	7.79121	5.07978
chr1	195365645	195366645	DHS_25255:::chr1:::195366145	25.2115	24.4207	0.968635	-0.0459755	0.98238	1	4.15086	1.70704	0.637857	1.1314	1.12353	1.80111	0.610926	0.423058	0.00612614	0	2.98018	2.44348	2.98134
chr1	195368210	195369210	p300_5481:::chr1:::195368710	38.9953	32.6629	0.837612	-0.255645	0.523029	0.85222	3.56922	3.56011	1.16264	1.56337	1.09074	2.19429	0.569901	0.660383	0.0306307	0	4.82851	6.43989	3.50864
chr1	195373170	195374170	DHS_25257:::chr1:::195373670	2.9119	1.98188	0.680613	-0.555093	0.874858	1	3.00475	0.907687	0.646012	1.0772	0.666591	0.796791	0.704332	0.0515925	0	0	2.09967	2.89219	1.31672
chr1	195376698	195377698	p300_5482:::chr1:::195377198	28.2901	44.3161	1.56649	0.647533	0.082248	0.261882	3.0665	1.04966	0.879354	2.33337	0.889446	1.04877	1.06779	0.474651	0.0245046	0.0142341	4.26395	2.09763	3.44856
chr1	195405571	195406571	p300_5484:::chr1:::195406071	0.637958	4.87393	7.63989	2.93355	0.126983	0.356124	2.2052	0.72067	0.53521	1.02009	0.860492	0.843497	0.737145	0.0103185	0	0.0284681	3.18257	1.55074	2.44386
chr1	195414933	195415933	p300_5486:::chr1:::195415433	41.1025	46.8679	1.14027	0.189375	0.632922	0.933728	3.76843	3.54153	1.18832	2.11664	0.564943	1.85199	0.269016	0.701657	0.0122523	0	9.47544	8.06035	5.61496
chr1	195456474	195457474	DHS_25270:::chr1:::195456974	1.74714	2.03293	1.16357	0.218564	1	1	3.15019	0.557904	0.678645	0.858436	1.27968	0.487866	1.04496	0.0309555	0	0	2.00258	2.45195	1.19603
chr1	195481333	195482333	DHS_25273:::chr1:::195481833	0.637958	1.98188	3.1066	1.63534	0.643776	0.934702	1.65827	1.25836	0.807887	0.647587	0.862003	0.527648	0.927771	0.0103185	0	0	1.63225	2.56954	3.46075
chr1	195482746	195483746	DHS_25274:::chr1:::195483246	0.582381	5.21415	8.95316	3.1624	0.102259	0.306183	1.9913	0.626833	0.277096	0.793486	0.853646	0.553162	0.820317	0.0103185	0	0	2.17499	1.49458	2.78359
chr1	195498347	195499347	p300_5489:::chr1:::195498847	1.74714	13.2182	7.56564	2.91946	0.00501228	0.0307491	1.98481	1.25362	0.514937	1.20071	0.940065	0.865649	0.423251	0.0309555	0	0	2.15566	4.74687	2.52894
chr1	195508784	195509784	DHS_25279:::chr1:::195509284	1.22034	0.808067	0.662166	-0.594734	1	1	2.00889	0.772896	0.409997	1.04827	1.31654	0.430773	1.07096	0.020637	0	0	0.985153	1.72317	0.980633
chr1	195558118	195559118	p300_5493:::chr1:::195558618	3.71659	8.02962	2.16048	1.11135	0.289299	0.60688	4.3705	2.42303	0.90491	1.66582	2.54879	0.679118	0.837438	0.061911	0	0	7.05454	8.11358	3.28984
chr1	195559944	195560944	DHS_25287:::chr1:::195560444	0	0.416796	Inf	Inf	1	1	3.49006	0.791727	0.40832	0.96046	3.5035	0.743619	0.938592	0	0	0	2.13667	1.60172	1.76226
chr1	195759782	195760782	DHS_25298:::chr1:::195760282	0.582381	1.64166	2.81888	1.49512	0.793036	1	4.00031	0.758757	0.480252	1.24426	1.13246	0.605506	1.19315	0.0103185	0	0	2.75242	5.96564	2.28713
chr1	195860038	195861038	DHS_25304:::chr1:::195860538	3.07864	3.23227	1.0499	0.0702565	1	1	2.32388	0.963422	0.84016	0.942389	1.22456	1.02511	1.29316	0.0515925	0	0	2.7351	2.25915	1.63353
chr1	196033873	196034873	DHS_25308:::chr1:::196034373	0.637958	7.74045	12.1332	3.60089	0.0217242	0.0977549	2.50013	0.937943	0.646012	0.718131	1.2114	0.737769	0.958674	0.0103185	0	0	1.99469	1.23951	1.19132
chr1	196331728	196332728	p300_5500:::chr1:::196332228	20.3301	15.7956	0.776956	-0.364095	0.545516	0.866413	5.18963	1.11991	0.409997	1.91683	0.815317	1.01539	0.724175	0.34051	0.00612614	0.0142341	6.2393	7.17989	4.96854
chr1	196436468	196437468	p300_5501:::chr1:::196436968	9.12475	14.962	1.63972	0.713447	0.31532	0.641368	2.3733	1.45893	0.59253	1.09654	1.21693	0.948657	0.619105	0.154777	0	0	2.74204	3.87386	2.14157
chr1	196441954	196442954	DHS_25330:::chr1:::196442454	15.282	31.6167	2.06888	1.04885	0.0299059	0.124321	3.64154	1.2352	0.605183	1.18899	0.632363	0.535453	0.721073	0.257962	0.00612614	0.0427022	2.97634	8.43379	4.8351
chr1	196755792	196756792	DHS_25360:::chr1:::196756292	0	3.23227	Inf	Inf	0.147994	0.394609	2.69432	0.783102	0.279604	0.84356	1.30801	0.85194	0.632978	0	0	0	1.98566	1.0968	1.62285
chr10	3111244	3112244	p300_5518:::chr10:::3111744	31.0909	55.9437	1.79936	0.847486	0.0145873	0.0717423	6.4401	3.76949	0.853486	4.5389	0.701153	2.1163	0.653961	0.526243	0.0306307	0.0284681	4.46615	3.68277	1.98149
chr10	3293510	3294510	p300_5526:::chr10:::3294010	4.29897	20.6695	4.80801	2.26544	0.00180102	0.0133651	2.14461	1.33127	0.617924	1.92746	0.789654	0.616775	1.50649	0.0722294	0.0122523	0	3.11801	2.27244	3.72445
chr10	4211764	4212764	DHS_25457:::chr10:::4212264	0	2.44973	Inf	Inf	0.264353	0.575522	5.81339	1.2651	0.18068	1.18261	0.470032	0.341704	0.641862	0	0	0	3.10653	3.36657	2.17804
chr10	4310007	4311007	p300_5534:::chr10:::4310507	0.637958	0.416796	0.653329	-0.614119	1	1	1.66925	1.25281	1.10427	0.66079	0.932916	0.740575	0.376417	0.0103185	0	0	5.0935	3.8018	4.77291
chr10	4663565	4664565	DHS_25503:::chr10:::4664065	2.3851	7.00896	2.93864	1.55515	0.4366	0.776888	3.46411	0.521715	0.467618	0.888153	0.693615	0.596596	0.779418	0.041274	0.00612614	0.0284681	1.62299	1.63779	1.71496
chr10	4785305	4786305	p300_5550:::chr10:::4785805	18.4162	21.3244	1.15792	0.21153	0.700114	0.977572	6.09742	1.96918	0.617924	2.11968	0.393652	0.892701	0.277983	0.309555	0.0122523	0.0142341	12.6068	10.226	3.85089
chr10	4787410	4788410	DHS_25520:::chr10:::4787910	0	3.23227	Inf	Inf	0.147994	0.394609	2.76951	0.773996	0.229925	1.49906	0.668976	0.452956	1.35133	0	0	0	1.18167	1.26834	1.15487
chr10	5035891	5036891	DHS_25537:::chr10:::5036391	3.07864	4.45713	1.44776	0.533825	0.772478	1	2.62299	1.36752	0.703577	1.18883	0.844662	1.47846	0.447472	0.0515925	0.00612614	0.0284681	1.02905	1.64995	0.81946
chr10	5129808	5130808	p300_5554:::chr10:::5130308	0.637958	5.65647	8.86653	3.14837	0.0781542	0.253396	3.62612	0.786054	0.496823	1.55607	0.821966	0.58725	0.724585	0.0103185	0	0.0142341	2.78549	0.913542	2.77271
chr10	5141186	5142186	DHS_25545:::chr10:::5141686	10.5118	22.107	2.10306	1.07249	0.0611375	0.212087	1.79189	1.96974	0.832306	1.22522	0.69066	0.874482	0.922339	0.175414	0.0122523	0.0427022	1.69688	2.10239	2.92776
chr10	5774581	5775581	DHS_25585:::chr10:::5775081	0.582381	0.416796	0.715676	-0.482621	1	1	2.31085	0.730956	0.548624	1.03357	0.784119	0.637102	0.623513	0.0103185	0	0	0.971343	3.82279	1.61148
chr10	5859701	5860701	p300_5564:::chr10:::5860201	57.716	19.2149	0.332922	-1.58674	1.99193e-05	0.000293986	3.30894	1.85505	0.871172	2.75574	0.351368	2.55438	0.303414	0.980257	0.042883	0.128107	4.3921	3.87432	1.89953
chr10	5863606	5864606	p300_5566:::chr10:::5864106	299.839	113.163	0.377414	-1.40578	4.68303e-08	1.46447e-06	2.66561	5.99825	4.32896	2.01726	0.394349	6.56573	0.358688	5.10765	0.318559	0.170809	7.50306	7.70318	4.52015
chr10	5865864	5866864	DHS_25599:::chr10:::5866364	69.6149	55.8587	0.802397	-0.317613	0.275278	0.58825	2.39028	2.68225	1.40253	1.25767	0.551979	1.64445	0.523873	1.17631	0.0122523	0.0427022	3.3429	3.38872	2.9948
chr10	5876599	5877599	p300_5567:::chr10:::5877099	20.9947	21.9199	1.04407	0.0622188	1	1	3.10369	1.65713	0.5688	1.62616	0.501499	0.814942	0.576301	0.361147	0.0245046	0.0142341	6.1848	4.94421	1.90464
chr10	5879691	5880691	DHS_25603:::chr10:::5880191	85.0347	110.578	1.30038	0.378936	0.109457	0.321085	3.48569	2.40592	0.769303	1.78927	0.515337	2.39879	0.484012	1.44459	0.0245046	0.0284681	3.33923	3.04208	1.49576
chr10	6086052	6087052	DHS_25673:::chr10:::6086552	54.6374	78.5696	1.43802	0.524084	0.0640391	0.218824	5.38889	1.39407	0.419722	2.45628	0.383121	1.98446	0.389819	0.928664	0.532974	0.128107	2.52753	2.74407	3.33144
chr10	6091379	6092379	p300_5588:::chr10:::6091879	192.48	193.315	1.00434	0.00624585	0.98616	1	3.32486	6.24884	4.28764	4.05336	0.304219	6.07595	0.276074	3.26064	0.434956	0.256213	5.85826	5.12347	4.50424
chr10	6096631	6097631	p300_5592:::chr10:::6097131	233.167	207.792	0.891174	-0.166221	0.315692	0.641775	3.91917	4.67055	1.54481	7.62559	0.385426	3.26783	0.258255	3.95198	0.974056	0.38432	20.8637	13.6346	8.92028
chr10	6112654	6113654	p300_5595:::chr10:::6113154	10.2895	42.3342	4.1143	2.04065	2.39696e-05	0.00034483	2.12974	1.74635	0.751847	1.17741	1.25997	1.62926	0.392783	0.175414	0.0122523	0.0569363	2.89802	2.76494	4.51066
chr10	6115327	6116327	p300_5596:::chr10:::6115827	21.2726	84.745	3.98377	1.99413	3.79729e-09	1.57184e-07	1.74607	2.93663	1.56085	1.71656	0.975846	2.02185	0.424468	0.361147	0.0612614	0.0142341	2.39755	1.46778	3.15024
chr10	6118199	6119199	DHS_25689:::chr10:::6118699	6.04612	18.9258	3.13024	1.64627	0.0182883	0.0857226	2.0653	0.407246	0.547528	0.89327	0.940065	0.931395	0.472196	0.103185	0.042883	0.0427022	1.07198	1.66198	1.22227
chr10	6616128	6617128	p300_5640:::chr10:::6616628	27.1253	12.9546	0.477583	-1.06618	0.0680884	0.228383	3.00092	1.47499	0.608562	1.61579	0.689025	0.737769	0.432055	0.454014	0.0122523	0.0427022	7.78628	7.9191	4.80708
chr10	6699347	6700347	p300_5641:::chr10:::6699847	14.5329	13.6606	0.939975	-0.0893061	0.942471	1	4.52636	2.91395	0.609968	2.84787	0.75649	0.91952	1.15457	0.247644	0	0	8.12834	8.19248	5.80187
chr10	6754024	6755024	p300_5643:::chr10:::6754524	4.2434	10.0626	2.37134	1.2457	0.190089	0.467498	1.8591	1.53609	1.05072	1.35602	0.56518	1.10397	0.766749	0.0722294	0	0	1.96366	0.858681	2.73651
chr10	7173581	7174581	p300_5657:::chr10:::7174081	8.95802	20.1251	2.2466	1.16774	0.068042	0.228268	2.44544	1.28007	0.475326	3.57298	0.31456	1.2735	1.80447	0.154777	0.0306307	0.0569363	26.1167	5.47716	2.2283
chr10	7301618	7302618	p300_5658:::chr10:::7302118	67.8677	69.1025	1.01819	0.0260123	0.941406	1	1.89746	5.46838	2.69395	1.37756	0.995136	2.0167	0.299069	1.14535	0.0183784	0.0142341	8.87354	5.53145	6.3897
chr10	7774735	7775735	p300_5686:::chr10:::7775235	12.6746	20.9842	1.65561	0.727363	0.218135	0.508843	2.27185	1.484	0.855999	1.98341	0.854604	0.674532	1.11799	0.216688	0.0122523	0	3.1995	5.6401	4.6578
chr10	7849843	7850843	DHS_25926:::chr10:::7850343	43.2387	71.6372	1.65679	0.728388	0.0157587	0.0762937	1.86112	3.98623	1.83263	0.973163	1.92481	1.85144	0.965592	0.732613	0.00612614	0	0.966008	1.03685	2.77983
chr10	7852353	7853353	p300_5689:::chr10:::7852853	101.786	129.793	1.27515	0.350669	0.111685	0.324916	4.78513	4.37542	1.385	2.901	0.747594	2.37867	0.723559	1.73351	0.0367568	0.0142341	13.5393	4.44039	5.05392
chr10	7854424	7855424	DHS_25931:::chr10:::7854924	19.0542	10.8451	0.569171	-0.813066	0.189413	0.466207	1.68883	0.885727	0.423577	0.930095	0.693677	1.23041	1.1021	0.319873	0.0122523	0	3.07331	2.44348	1.50179
chr10	7897154	7898154	DHS_25936:::chr10:::7897654	3.82775	21.2223	5.54434	2.47102	0.00598601	0.0355111	2.3879	1.0252	0.634476	0.959218	0.755409	0.869514	0.739793	0.061911	0.00612614	0	1.95907	1.75843	2.34009
chr10	8239839	8240839	DHS_25972:::chr10:::8240339	17.1959	22.6769	1.31874	0.399161	0.454192	0.791953	2.50187	1.37043	0.882749	0.889517	3.98145	1.44578	0.922339	0.288918	0.0245046	0.0142341	0.873392	0.891152	1.62285
chr10	8248672	8249672	p300_5696:::chr10:::8249172	17.9716	33.2157	1.84823	0.886146	0.202832	0.484959	2.37465	2.15353	0.823899	1.5613	1.07278	0.992951	0.725815	0.309555	0.0122523	0	2.80779	3.32697	4.16532
chr10	8258397	8259397	p300_5698:::chr10:::8258897	31.0909	50.8827	1.63658	0.710686	0.0476681	0.176256	2.70075	4.74618	2.08876	1.39075	1.11715	1.80598	1.59136	0.526243	0.0245046	0	2.11446	2.4538	2.18571
chr10	8280319	8281319	DHS_25990:::chr10:::8280819	3.18979	6.43901	2.01863	1.01338	0.386779	0.721048	4.15863	1.12054	0.652081	1.30202	0.510186	0.652499	2.07642	0.0515925	0	0.0142341	1.85699	1.52257	1.31704
chr10	8608873	8609873	p300_5711:::chr10:::8609373	61.9038	182.496	2.94805	1.55976	1.79306e-12	1.57023e-10	4.27941	1.68173	0.807887	3.17094	0.50325	0.688237	0.555142	1.05249	0.0551353	0.0854044	12.9764	20.2351	7.94509
chr10	8655129	8656129	DHS_26050:::chr10:::8655629	7.32203	24.242	3.31083	1.72719	0.00495799	0.0304874	2.57293	1.97323	0.683869	1.22394	0.696688	1.07778	0.552918	0.123822	0	0.0142341	1.27806	1.31735	2.12639
chr10	8804957	8805957	p300_5713:::chr10:::8805457	40.3823	36.8819	0.913318	-0.13081	0.755848	1	4.53188	2.50144	1.2201	1.85159	1.30232	0.744348	0.699098	0.68102	0.00612614	0	19.2715	10.2284	9.04973
chr10	8810457	8811457	DHS_26058:::chr10:::8810957	161.251	123.668	0.766928	-0.382837	0.0543698	0.194294	2.66455	2.51947	1.55925	2.22956	0.60621	0.970822	0.72408	2.72408	0.0490091	0.0427022	3.12988	6.37132	8.1863
chr10	8837354	8838354	DHS_26059:::chr10:::8837854	38.8285	52.2607	1.34594	0.42861	0.222863	0.516144	2.17264	3.97533	3.17544	1.21417	1.16855	1.052	1.14581	0.660383	0.0245046	0	1.06928	1.54301	2.49063
chr10	8972284	8973284	DHS_26065:::chr10:::8972784	1.27592	0.391271	0.306659	-1.70529	0.821268	1	3.3252	0.923427	0.750081	1.04108	0.855839	0.525394	0.646882	0.020637	0.00612614	0	2.93711	4.72877	3.50836
chr10	9051090	9052090	p300_5715:::chr10:::9051590	17.9716	24.999	1.39103	0.476152	0.381251	0.71586	2.8081	2.1863	1.18931	1.63938	0.991198	0.97793	0.387202	0.309555	0.00612614	0	6.9579	9.38133	4.04015
chr10	9340565	9341565	p300_5717:::chr10:::9341065	3.77217	9.33106	2.47366	1.30665	0.179853	0.449454	4.75123	1.01574	0.321	1.57989	0.759987	0.674532	0.670792	0.061911	0.00612614	0	7.34885	6.68942	4.03078
chr10	9396441	9397441	p300_5719:::chr10:::9396941	0.637958	0.808067	1.26665	0.341015	1	1	2.15009	3.38607	2.82096	0.879242	5.62813	1.12911	0.598852	0.0103185	0	0	3.01257	3.29339	3.95835
chr10	10948983	10949983	p300_5736:::chr10:::10949483	44.5146	45.9577	1.03242	0.04603	0.920321	1	5.15505	1.60423	0.689052	3.12568	0.380422	0.817385	0.178054	0.75325	0.042883	0.0854044	8.39113	9.26413	3.62223
chr10	10951620	10952620	p300_5737:::chr10:::10952120	20.7458	24.4801	1.18001	0.238795	0.640674	0.934186	2.47072	0.897643	0.53844	1.40289	0.526592	0.511847	0.535799	0.350829	0	0.0711703	3.73759	5.15463	2.7474
chr10	10975748	10976748	DHS_26156:::chr10:::10976248	65.7871	59.5078	0.904551	-0.144726	0.625962	0.933728	2.44297	1.50561	2.10879	1.56735	0.470032	2.24141	2.56205	1.1144	0.0918921	0.0711703	1.28313	3.48681	2.62747
chr10	10988650	10989650	DHS_26161:::chr10:::10989150	7.79326	5.99669	0.769472	-0.37806	0.727285	0.998525	2.53765	0.769522	0.357182	1.4977	0.415693	0.975732	0.485161	0.13414	0.0367568	0.0427022	2.00258	1.22598	2.63127
chr10	11466383	11467383	p300_5749:::chr10:::11466883	2.44068	5.2652	2.15727	1.10921	0.448757	0.786806	7.0925	1.21164	0.569515	3.24714	0.506855	0.598375	1.70583	0.041274	0	0	7.76975	4.88696	2.47915
chr10	11500601	11501601	p300_5751:::chr10:::11501101	5.93496	5.29073	0.89145	-0.165774	0.924839	1	5.51337	1.3097	0.686582	1.7408	0.58754	0.931775	1.52442	0.103185	0	0	4.81174	5.47068	2.74608
chr10	11518986	11519986	p300_5753:::chr10:::11519486	28.8991	10.5559	0.365268	-1.45297	0.0120806	0.0620346	2.367	1.21805	0.668887	1.87306	0.523335	0.769714	7.35494	0.495288	0.0122523	0.0142341	5.83362	2.34272	1.91982
chr10	11552170	11553170	DHS_26220:::chr10:::11552670	0.637958	0	0	#NAME?	0.903999	1	2.6991	0.541797	0.646665	0.93691	0.60667	0.830419	0.450445	0.0103185	0	0	1.34281	0.880789	1.04259
chr10	11565645	11566645	p300_5756:::chr10:::11566145	4.29897	4.8484	1.1278	0.173518	0.988477	1	6.00613	0.763047	0.632995	1.23308	0.632824	0.570062	0.923839	0.0722294	0	0	2.9293	1.47801	2.01867
chr10	11737795	11738795	p300_5758:::chr10:::11738295	4.2434	6.90686	1.62767	0.70281	0.566351	0.884716	2.25235	1.11416	0.609968	1.09846	0.714126	0.668742	0.628088	0.0722294	0	0	6.74057	3.12094	3.55217
chr10	11754663	11755663	p300_5759:::chr10:::11755163	0.582381	8.523	14.6347	3.87133	0.0132414	0.0665568	5.51236	0.217056	0.369411	1.37382	0.758693	0.388131	0.947403	0.0103185	0	0	2.636	1.81136	2.99875
chr10	12031075	12032075	DHS_26241:::chr10:::12031575	0.637958	2.4242	3.79994	1.92598	0.515749	0.848965	2.68762	0.633079	0.537325	0.70408	0.651403	0.423415	0.92401	0.0103185	0	0	1.88286	0.823347	1.04956
chr10	12598276	12599276	p300_5790:::chr10:::12598776	35.7789	54.1916	1.51463	0.598961	0.0913812	0.282715	5.10793	4.9719	1.84116	2.39885	0.851814	1.85496	0.245957	0.598473	0.0306307	0.0284681	10.7469	7.91488	6.75636
chr10	12601435	12602435	DHS_26316:::chr10:::12601935	5.63047	15.7956	2.80538	1.4882	0.0432338	0.16433	3.09342	1.14765	0.828634	1.47698	0.513254	1.54225	0.412285	0.0928664	0.00612614	0	2.47777	1.27698	1.53269
chr10	12602908	12603908	DHS_26317:::chr10:::12603408	19.3587	55.7311	2.87887	1.5255	9.15487e-05	0.00108884	2.551	1.73164	0.934867	1.29423	0.712853	1.55721	0.643255	0.330192	0.0183784	0	2.64202	3.91318	2.85047
chr10	12628642	12629642	DHS_26319:::chr10:::12629142	18.7763	55.1273	2.936	1.55385	8.2275e-05	0.000992493	4.95951	1.27128	0.503887	6.7942	0.338907	0.808063	2.21678	0.319873	0	0	3.56854	2.47075	4.381
chr10	12631697	12632697	p300_5792:::chr10:::12632197	175.562	236.5	1.3471	0.42986	0.0102543	0.0545267	3.71175	5.02768	1.99088	3.45751	0.565753	3.76913	0.654141	2.97173	0.0367568	0.0284681	4.28231	4.69683	5.99567
chr10	12648628	12649628	DHS_26331:::chr10:::12649128	57.6048	71.969	1.24936	0.321186	0.278756	0.593021	4.10732	1.67183	0.747257	1.46966	1.24613	1.63064	0.960949	0.980257	0.110271	0.0284681	2.68562	1.40926	2.11726
chr10	12649916	12650916	DHS_26335:::chr10:::12650416	3.13421	8.523	2.71934	1.44326	0.171786	0.435324	4.53031	1.71586	0.741509	1.24987	1.5041	1.24076	0.545205	0.0515925	0.0306307	0.0284681	3.07952	1.75062	2.02316
chr10	12713255	12714255	DHS_26345:::chr10:::12713755	13.5349	18.2709	1.34991	0.432862	0.478162	0.812037	1.94964	3.93331	1.75547	1.18492	1.75194	2.2379	0.798895	0.227007	0.0122523	0	1.04984	1.492	4.07557
chr10	12715151	12716151	p300_5799:::chr10:::12715651	13.4237	16.425	1.22358	0.291108	0.656997	0.944799	2.11234	2.21142	1.56021	1.02876	1.77082	1.72555	0.593443	0.227007	0.0122523	0.0142341	2.99255	2.31522	2.84134
chr10	12733631	12734631	p300_5802:::chr10:::12734131	26.3206	36.6267	1.39156	0.4767	0.23984	0.543334	4.46164	2.21022	1.04976	1.34199	0.598883	1.37869	0.465324	0.443695	0.0245046	0.0284681	3.38866	6.3172	1.22497
chr10	12744165	12745165	p300_5806:::chr10:::12744665	63.7065	167.142	2.62363	1.39156	6.02762e-10	3.07379e-08	3.57779	1.44585	0.53182	4.00152	0.294733	0.904674	1.49061	1.08344	0.0183784	0	4.44889	3.47695	3.78776
chr10	13351424	13352424	DHS_26409:::chr10:::13351924	3.54986	19.6828	5.54466	2.4711	0.00148172	0.0113438	2.05309	1.51726	0.969293	0.867389	0.753434	1.27301	0.717375	0.061911	0	0.0142341	1.69826	1.93083	2.1638
chr10	14290147	14291147	p300_5852:::chr10:::14290647	4.7702	22.813	4.78239	2.25773	0.00575882	0.0344614	5.39819	0.948146	0.538887	2.22287	0.655859	1.01915	0.575568	0.0825479	0.00612614	0	3.35703	1.93774	2.16538
chr10	14687135	14688135	p300_5859:::chr10:::14687635	38.9953	67.5969	1.73346	0.793658	0.0112691	0.0586093	6.64978	1.17051	0.549848	5.10116	0.262899	0.522691	2.1886	0.660383	0.0306307	0.0569363	15.4628	6.67609	3.91616
chr10	15019456	15020456	p300_5864:::chr10:::15019956	0.582381	0.808067	1.38752	0.472512	1	1	2.61272	1.1826	1.1292	0.866131	0.880416	1.28529	0.273112	0.0103185	0	0	3.98618	2.61465	3.08095
chr10	16307818	16308818	DHS_26585:::chr10:::16308318	0	0	NA	NA	NA	NA	3.95222	1.1637	0.475326	2.82833	0.522623	0.408611	0.300997	0	0	0	1.61513	1.27129	1.54341
chr10	16896510	16897510	p300_5872:::chr10:::16897010	33.4204	59.797	1.78924	0.839345	0.0133175	0.0668325	4.91157	1.31648	0.631656	3.01934	0.43243	0.46168	1.39649	0.567517	0	0.0142341	8.31469	8.75309	5.88554
chr10	16898148	16899148	p300_5873:::chr10:::16898648	4.2434	11.7042	2.75822	1.46374	0.101732	0.30524	7.87392	0.594893	0.477622	2.16758	0.313355	0.125456	1.39316	0.0722294	0	0	9.26086	5.41579	2.73219
chr10	16920292	16921292	p300_5875:::chr10:::16920792	1.74714	5.97117	3.41768	1.77302	0.269108	0.579403	2.11984	0.668676	0.59253	1.15426	1.05596	0.85972	1.01219	0.0309555	0.00612614	0	4.74583	1.93693	2.96041
chr10	16922226	16923226	p300_5876:::chr10:::16922726	2.49625	5.63095	2.25576	1.17361	0.382124	0.716716	3.44055	0.470652	0.343291	1.13305	0.705048	0.688585	0.663029	0.041274	0	0	9.79846	3.06052	2.36871
chr10	16933173	16934173	p300_5878:::chr10:::16933673	23.0197	55.8927	2.42804	1.27979	0.00060953	0.00538758	8.20366	3.60067	1.30089	2.23586	0.494771	1.97429	0.352395	0.392103	0	0	15.3976	8.68221	5.40476
chr10	16935037	16936037	DHS_26602:::chr10:::16935537	1.74714	20.8482	11.9327	3.57685	0.0140271	0.0696084	4.26118	1.0909	0.686582	1.26391	0.477866	0.685306	1.27932	0.0309555	0	0	2.18132	2.01994	2.52894
chr10	16949713	16950713	p300_5879:::chr10:::16950213	47.4821	74.1635	1.56193	0.643327	0.0286323	0.120439	9.18537	5.27602	1.59464	4.92168	0.506855	1.97464	0.218188	0.804842	0	0	9.89845	3.35106	8.96308
chr10	16956934	16957934	p300_5880:::chr10:::16957434	27.541	31.1999	1.13285	0.179963	0.699084	0.976807	5.89051	2.34697	0.590844	2.89541	0.573027	1.55196	2.1607	0.464332	0	0	8.18955	3.5007	8.51836
chr10	17051247	17052247	p300_5882:::chr10:::17051747	12.1478	29.4817	2.42691	1.27912	0.0139042	0.0691363	4.11392	3.78264	1.96048	1.30706	0.741858	2.60738	0.259292	0.20637	0.00612614	0	2.96821	1.33852	2.04975
chr10	17075593	17076593	DHS_26623:::chr10:::17076093	0	0.808067	Inf	Inf	0.844589	1	4.38924	0.827123	0.62158	1.234	1.02628	0.729911	0.623989	0	0	0	1.22998	0.896425	1.55083
chr10	17115457	17116457	DHS_26627:::chr10:::17115957	0	0	NA	NA	NA	NA	2.54881	0.560358	0.472901	0.773823	0.705048	0.563114	0.702735	0	0	0	2.1211	2.16423	1.05568
chr10	17198262	17199262	p300_5883:::chr10:::17198762	13.257	28.6992	2.16483	1.11425	0.0324765	0.132674	2.45488	1.22333	0.634625	1.02479	0.899413	0.63169	0.825951	0.227007	0.00612614	0	3.37082	2.62047	2.98254
chr10	17210446	17211446	DHS_26632:::chr10:::17210946	5.40816	5.13758	0.949967	-0.07405	1	1	2.19832	1.02152	0.795348	1.1419	0.900507	0.73923	1.11868	0.0928664	0	0	1.94375	2.99992	3.55099
chr10	17261550	17262550	p300_5884:::chr10:::17262050	1.91387	5.21415	2.7244	1.44594	0.312628	0.638294	2.82584	0.606469	0.32956	1.15156	0.802188	0.51939	0.621725	0.0309555	0	0	5.85108	1.75062	2.45231
chr10	17294925	17295925	p300_5887:::chr10:::17295425	161.222	228.224	1.41558	0.501395	0.00346673	0.0228704	4.78853	3.96784	1.3175	10.9216	0.304886	2.49557	0.452399	2.7344	0.042883	0.0427022	4.85509	3.54855	4.22526
chr10	17298948	17299948	p300_5889:::chr10:::17299448	112.075	118.318	1.0557	0.0781997	0.767099	1	5.7433	2.1458	0.569141	7.16147	0.282947	1.4736	0.608825	1.90892	0.0122523	0.0427022	31.4536	13.6546	8.93903
chr10	17311890	17312890	p300_5890:::chr10:::17312390	1.80272	7.29813	4.0484	2.01735	0.121766	0.346031	1.8923	0.889429	0.319616	1.38921	0.674658	0.671624	0.890535	0.0309555	0	0	2.78749	0.914199	2.73507
chr10	17318665	17319665	p300_5891:::chr10:::17319165	31.202	34.2535	1.0978	0.134614	0.753555	1	3.48526	1.36794	0.864046	1.41922	0.621399	1.01787	0.693057	0.526243	0.0183784	0	5.96983	3.59482	2.51336
chr10	17320267	17321267	p300_5892:::chr10:::17320767	1.22034	2.44973	2.00742	1.00534	0.756613	1	1.82773	0.851701	0.656848	1.61721	0.688394	0.869057	0.626997	0.020637	0.00612614	0	2.63699	1.19288	2.28094
chr10	17351970	17352970	p300_5894:::chr10:::17352470	1.91387	10.4028	5.43546	2.4424	0.0230273	0.102166	2.13156	0.803355	0.532693	0.939761	0.863076	0.811546	0.556584	0.0309555	0	0	1.99107	1.1754	1.1297
chr10	17372768	17373768	p300_5896:::chr10:::17373268	26.9586	64.9856	2.41057	1.26937	0.000215009	0.00224331	4.54863	0.578135	0.435158	1.55764	0.933444	1.00586	0.717375	0.454014	0.0183784	0.0142341	5.31325	2.98724	2.71999
chr10	17416779	17417779	p300_5898:::chr10:::17417279	10.8163	10.8706	1.00502	0.00722497	1	1	2.07134	2.31084	0.485705	2.9804	0.720442	0.765476	1.26872	0.185733	0	0	4.23602	3.57239	2.83113
chr10	17438676	17439676	DHS_26668:::chr10:::17439176	2.32952	6.38796	2.74218	1.45532	0.306301	0.629341	3.26515	0.978878	0.415411	1.2347	0.942039	0.681972	0.840957	0.041274	0	0	4.65809	3.30999	3.01387
chr10	17723717	17724717	p300_5914:::chr10:::17724217	6.15727	22.1836	3.60282	1.84913	0.00456921	0.0286363	4.51094	1.04216	0.624166	1.08518	0.591101	1.67228	0.652159	0.103185	0.0122523	0.0142341	5.24918	5.04986	2.43838
chr10	17763981	17764981	p300_5916:::chr10:::17764481	2.3851	2.34763	0.984288	-0.022847	1	1	2.78005	0.955312	0.457722	0.819201	1.00535	0.811546	0.836938	0.041274	0	0	7.80572	4.76931	1.46883
chr10	17970890	17971890	p300_5928:::chr10:::17971390	43.6277	60.8176	1.39401	0.479246	0.119343	0.340921	3.3503	2.9599	1.08896	2.00723	0.497001	1.11754	0.564492	0.732613	0.104144	0	4.44889	6.08467	3.33549
chr10	18049298	18050298	p300_5935:::chr10:::18049798	109.664	120.7	1.10063	0.138334	0.519447	0.850774	4.0528	8.4777	7.07937	4.36646	0.566259	5.18878	0.677835	1.85733	0.661623	0.241979	6.45607	5.9644	4.88772
chr10	18082993	18083993	DHS_26764:::chr10:::18083493	114.712	189.045	1.648	0.720716	0.000157808	0.00172966	2.85074	6.08366	4.19306	1.31315	0.7783	4.42662	0.412258	1.93988	0.361442	0.341618	1.94969	2.65609	4.2995
chr10	18091312	18092312	p300_5940:::chr10:::18091812	70.584	85.9443	1.21762	0.284062	0.341632	0.672577	3.55099	5.60861	2.15511	2.08701	0.613653	5.12977	0.292264	1.20726	0.404325	0.0427022	3.56426	5.23689	5.10898
chr10	18268679	18269679	DHS_26816:::chr10:::18269179	40.3823	72.8282	1.80347	0.850772	0.0052766	0.0320526	2.96144	6.12951	4.24674	1.03699	1.61698	3.03311	0.722915	0.68102	0.0551353	0.0142341	2.1402	1.40382	5.32596
chr10	18469520	18470520	p300_5969:::chr10:::18470020	9.81829	10.0881	1.02748	0.0391083	1	1	2.28547	2.05959	0.775869	1.09104	0.63233	0.989868	0.424635	0.165096	0.0183784	0	5.79999	3.66851	2.4743
chr10	18508120	18509120	p300_5971:::chr10:::18508620	2.3851	4.50818	1.89014	0.918496	0.60847	0.923043	1.72733	1.34407	0.855587	1.30037	0.639967	0.824032	1.33266	0.041274	0	0.0142341	3.90862	1.63149	3.07718
chr10	18590510	18591510	p300_5976:::chr10:::18591010	3.07864	5.21415	1.69366	0.760141	0.59499	0.910852	4.48273	1.35712	0.329959	0.874307	0.705048	0.315164	0.543255	0.0515925	0.00612614	0	10.2028	6.61875	3.34812
chr10	18592368	18593368	p300_5977:::chr10:::18592868	2.44068	4.09139	1.67633	0.745308	0.701141	0.978492	2.52307	1.07206	0.683281	1.20011	1.0169	1.12368	0.672539	0.041274	0	0	2.99809	2.3307	2.58642
chr10	18627069	18628069	p300_5978:::chr10:::18627569	67.312	130.465	1.93821	0.954723	5.60606e-05	0.000716156	2.35134	1.95161	0.970561	1.43927	1.10741	1.05374	0.856343	1.14535	0.0245046	0.0284681	4.59509	1.58634	3.10551
chr10	18843181	18844181	DHS_26882:::chr10:::18843681	7.90441	14.4686	1.83045	0.872199	0.230232	0.527582	2.38919	2.03766	0.882749	1.56054	1.13383	1.00698	1.15951	0.13414	0	0	1.97969	0.74202	2.98406
chr10	18936294	18937294	DHS_26893:::chr10:::18936794	1.22034	1.59061	1.30342	0.382298	1	1	2.30083	0.689779	0.320168	0.851339	0.57719	0.605506	0.334527	0.020637	0	0	1.1967	0.470971	1.42946
chr10	18959510	18960510	DHS_26894:::chr10:::18960010	2.96748	9.20344	3.10143	1.63293	0.12636	0.354895	2.20268	1.3075	0.686582	1.01564	0.721835	1.13359	0.290366	0.0515925	0	0	2.01635	1.56305	3.2296
chr10	19020028	19021028	DHS_26897:::chr10:::19020528	1.16476	4.01481	3.44689	1.7853	0.364476	0.696134	3.7716	1.01218	0.445925	0.895813	1.06848	0.769714	1.0095	0.020637	0	0.0142341	1.7858	1.56181	1.84871
chr10	19048892	19049892	DHS_26900:::chr10:::19049392	1.22034	6.54111	5.36008	2.42225	0.101733	0.30524	2.35345	1.09075	0.675043	1.16832	1.23828	0.681972	0.669148	0.020637	0	0	1.35861	1.40038	1.85469
chr10	19058630	19059630	DHS_26902:::chr10:::19059130	0.637958	2.03293	3.18662	1.67203	0.6394	0.933728	2.33443	2.4106	1.2705	0.915449	1.60777	0.849469	0.42238	0.0103185	0	0	1.94269	1.13268	1.67594
chr10	19072415	19073415	DHS_26904:::chr10:::19072915	3.02306	10.8451	3.58746	1.84296	0.0611805	0.212155	2.17019	7.82007	6.7842	0.806516	6.16301	2.29276	0.782591	0.0515925	0.0122523	0	3.14951	3.49606	2.50804
chr10	19080970	19081970	DHS_26909:::chr10:::19081470	5.51931	7.66388	1.38856	0.473586	0.671846	0.953789	1.98681	5.46193	3.78936	0.836735	6.46581	1.7871	1.27478	0.0928664	0.00612614	0.0142341	2.17283	1.9003	4.18153
chr10	19089629	19090629	p300_5991:::chr10:::19090129	3.07864	6.12432	1.9893	0.992258	0.444934	0.783754	2.15891	1.01218	0.350369	1.10755	0.930373	0.635851	1.78604	0.0515925	0.00612614	0	4.52403	0.937087	1.49319
chr10	19091712	19092712	p300_5992:::chr10:::19092212	0.637958	0	0	#NAME?	0.903999	1	2.98047	0.603355	0.433631	0.960867	1.31114	0.759342	0.9565	0.0103185	0	0	6.88839	2.48063	2.09737
chr10	19123905	19124905	p300_5993:::chr10:::19124405	1.74714	8.08067	4.62508	2.20948	0.0825566	0.262512	6.10055	1.98698	0.73782	1.90215	0.848864	0.613707	0.610304	0.0309555	0	0	14.0187	9.19527	4.73534
chr10	19133510	19134510	p300_5995:::chr10:::19134010	2.44068	5.63095	2.30712	1.2061	0.384132	0.718819	3.64807	2.11794	0.829249	0.93015	0.781352	0.983692	0.59626	0.041274	0	0	6.19903	6.68942	3.5232
chr10	19151984	19152984	p300_5996:::chr10:::19152484	3.13421	6.49006	2.07072	1.05013	0.382935	0.717612	5.88266	0.889889	0.396529	1.90938	0.565547	0.590215	1.08182	0.0515925	0	0	15.8093	3.56461	4.27843
chr10	19161439	19162439	p300_5997:::chr10:::19161939	57.716	80.5854	1.39624	0.481547	0.206547	0.490442	2.97263	3.64285	2.06724	1.21795	1.28191	1.55817	0.539988	0.980257	0.0306307	0	5.29117	4.18679	4.66496
chr10	19214247	19215247	DHS_26926:::chr10:::19214747	1.22034	2.81547	2.30712	1.2061	0.635814	0.933728	2.54601	1.5582	0.561749	0.919207	1.4101	0.796791	0.733679	0.020637	0.00612614	0	1.36479	2.75447	2.38264
chr10	19427796	19428796	p300_5999:::chr10:::19428296	23.4087	42.0195	1.79503	0.844012	0.0333856	0.135525	2.71715	4.00662	3.01832	1.4219	1.29078	1.698	0.264877	0.392103	0.0367568	0.0284681	3.73095	3.14645	2.91801
chr10	19555349	19556349	p300_6002:::chr10:::19555849	1.16476	1.17381	1.00777	0.011168	1	1	3.89526	1.56191	0.596243	1.13641	1.19363	0.740358	0.670179	0.020637	0	0	2.8364	3.45517	3.02505
chr10	20005594	20006594	p300_6036:::chr10:::20006094	75.1342	87.016	1.15814	0.211811	0.40013	0.736338	3.5494	4.66322	1.78046	2.41892	0.581565	2.23748	0.310052	1.26917	0.0367568	0.113873	3.8494	3.42363	1.75351
chr10	20009877	20010877	DHS_27059:::chr10:::20010377	65.2893	40.2757	0.616881	-0.696935	0.15731	0.411338	1.69994	5.40535	3.22109	1.10928	0.680047	4.23616	0.259476	1.09376	0.0183784	0	2.04755	2.6861	3.4241
chr10	20018627	20019627	p300_6040:::chr10:::20019127	11.9255	30.6555	2.57058	1.3621	0.00941919	0.0509975	5.20383	2.8973	1.24137	2.18645	0.509901	2.1448	0.509208	0.20637	0	0.0142341	4.33057	2.97581	1.84744
chr10	20098454	20099454	p300_6044:::chr10:::20098954	1.22034	0.808067	0.662166	-0.594734	1	1	1.68883	0.724685	0.847154	0.853649	1.00071	0.837725	0.971928	0.020637	0	0	4.65653	4.39826	2.11363
chr10	20807175	20808175	p300_6070:::chr10:::20807675	3.71659	7.63835	2.0552	1.03928	0.334724	0.664059	4.09445	0.875838	0.677548	1.21956	0.983357	0.797309	0.509714	0.061911	0.0122523	0	7.80009	7.17612	3.38806
chr10	20810392	20811392	p300_6071:::chr10:::20810892	42.8786	34.0493	0.794087	-0.332631	0.438464	0.778602	4.06659	2.64297	0.708795	1.22674	1.26079	1.35576	0.930478	0.722294	0	0	17.9337	9.53532	4.34113
chr10	20820334	20821334	p300_6072:::chr10:::20820834	147.187	138.962	0.944116	-0.0829632	0.648411	0.937611	4.20928	5.50304	1.8813	3.66033	0.82721	3.1819	0.32495	2.50739	0.0367568	0	9.08991	4.79987	3.17541
chr10	20821599	20822599	p300_6073:::chr10:::20822099	303.42	249.276	0.821555	-0.283571	0.0541671	0.193742	4.06294	7.15226	1.82367	7.48749	0.630301	2.58579	0.234329	5.13861	0.0796398	0.0569363	40.1705	24.9165	10.7508
chr10	20829298	20830298	p300_6074:::chr10:::20829798	65.3981	85.0341	1.30025	0.378794	0.162432	0.419351	5.17981	2.95349	1.08444	2.56339	0.518281	2.47226	0.370565	1.1144	0.0551353	0.0284681	3.28856	6.0197	2.64923
chr10	20833938	20834938	DHS_27159:::chr10:::20834438	1.16476	5.682	4.87825	2.28636	0.159646	0.415139	1.69489	0.546229	0.283019	1.0613	0.947241	0.520381	0.804994	0.020637	0	0	1.05785	0.693874	1.00035
chr10	20898267	20899267	p300_6083:::chr10:::20898767	72.1667	80.9088	1.12114	0.164964	0.534616	0.857798	1.84659	2.13438	0.873154	0.961671	0.664176	1.41138	0.693982	1.21758	0.00612614	0.0142341	3.59835	3.7325	3.44856
chr10	20908488	20909488	DHS_27181:::chr10:::20908988	16.3912	30.4768	1.85934	0.894791	0.0620087	0.213737	1.70625	2.20283	1.55592	0.920654	1.09561	1.8216	0.278693	0.278599	0	0	2.90782	3.1607	3.47337
chr10	20912699	20913699	p300_6084:::chr10:::20913199	90.6096	123.481	1.36278	0.446556	0.0473654	0.17547	3.84848	4.46567	1.46659	2.04985	0.910316	2.034	0.39501	1.53746	0.0245046	0.0284681	3.72758	3.64357	2.75012
chr10	20915262	20916262	DHS_27186:::chr10:::20915762	6.85081	14.8854	2.1728	1.11956	0.117578	0.337172	2.02238	0.97126	0.553006	0.971293	0.79558	0.833651	0.803907	0.113503	0.0183784	0	1.61764	1.53264	1.98594
chr10	21093933	21094933	p300_6087:::chr10:::21094433	68.0611	91.0564	1.33786	0.41993	0.105184	0.311814	1.74528	5.88063	5.55202	1.21164	0.911792	3.78315	0.687709	1.15567	0.355316	0.128107	3.73362	2.96157	3.11148
chr10	21138735	21139735	p300_6088:::chr10:::21139235	12.2034	12.9801	1.06365	0.0890229	0.968711	1	1.8591	1.47433	1.24669	0.942389	1.0885	1.59462	0.736253	0.20637	0.0490091	0.0284681	2.8364	2.12626	3.81157
chr10	21388458	21389458	p300_6097:::chr10:::21388958	68.2278	74.4443	1.09111	0.125801	0.669937	0.952261	2.4275	3.32818	1.82568	1.34051	0.998819	2.13953	0.855959	1.15567	0.0306307	0.0284681	6.47398	4.01693	8.88266
chr10	21403807	21404807	p300_6098:::chr10:::21404307	8.95802	7.5873	0.846984	-0.239593	0.835874	1	3.14759	0.889713	0.764758	1.2514	1.38217	1.1892	0.799056	0.154777	0.00612614	0	2.74412	1.94995	2.18523
chr10	21420998	21421998	p300_6101:::chr10:::21421498	10.8719	21.2734	1.95673	0.968447	0.103243	0.308038	4.11714	1.85209	0.594655	3.25232	1.7582	0.869271	0.576301	0.185733	0	0	26.5753	13.4381	9.86952
chr10	21426328	21427328	DHS_27247:::chr10:::21426828	3.66102	7.17051	1.95861	0.969831	0.3898	0.72391	2.0264	0.930319	0.53521	0.908124	1.30462	0.587892	1.38109	0.061911	0	0	2.63699	2.0279	1.84647
chr10	21432958	21433958	DHS_27249:::chr10:::21433458	1.91387	2.39868	1.25331	0.325743	0.978312	1	1.93435	0.610167	0.257468	0.908435	0.981192	0.513979	1.13883	0.0309555	0	0	1.9247	2.14619	2.47147
chr10	21465538	21466538	p300_6103:::chr10:::21466038	67.9789	65.5129	0.963724	-0.0533079	0.918477	1	6.29534	3.46912	0.784985	5.69171	0.541992	2.17822	0.364529	1.14535	0.0490091	0.0569363	22.645	10.8564	9.61553
chr10	21471970	21472970	p300_6105:::chr10:::21472470	14.6441	6.17537	0.421698	-1.24572	0.0827872	0.262709	1.96867	0.955174	0.72045	1.34609	0.828353	1.36835	0.743111	0.247644	0.00612614	0	4.45356	2.58154	4.26817
chr10	21495920	21496920	p300_6108:::chr10:::21496420	308.635	285.358	0.924583	-0.113125	0.447709	0.786017	4.22869	4.94562	1.94425	2.72666	0.439282	3.76193	0.408971	5.22116	0.0490091	0.0711703	6.04391	4.53071	5.24267
chr10	21509635	21510635	p300_6110:::chr10:::21510135	10.7607	24.6078	2.28681	1.19334	0.0382285	0.149486	1.51714	2.33843	0.767357	2.62282	1.05066	1.80344	0.696276	0.185733	0.0183784	0	2.11339	1.48525	5.00379
chr10	21525218	21526218	p300_6111:::chr10:::21525718	16.7802	21.8689	1.30325	0.382115	0.540747	0.86215	3.12219	2.59354	0.785322	1.69085	0.65553	1.02054	0.813345	0.278599	0.00612614	0.0284681	7.18382	5.16808	4.89027
chr10	21539339	21540339	p300_6112:::chr10:::21539839	22.6041	69.2812	3.06499	1.61588	4.64136e-06	8.33337e-05	3.16514	1.1929	0.90806	1.25712	0.510465	2.21066	0.439682	0.381784	0.0306307	0.0854044	2.64905	2.71498	1.82934
chr10	21540874	21541874	p300_6113:::chr10:::21541374	126.166	214.512	1.70023	0.765734	2.63564e-05	0.000374737	5.17008	3.6902	1.4093	3.9026	0.5393	2.3008	0.370015	2.13593	0.0490091	0.0996385	3.72784	3.72095	5.08209
chr10	21546286	21547286	p300_6114:::chr10:::21546786	403.459	393.248	0.974693	-0.0369809	0.774422	1	6.61966	5.06982	2.59129	10.895	0.389166	5.23578	0.223698	6.84116	0.404325	0.412788	35.0171	19.8736	9.04784
chr10	21548564	21549564	p300_6116:::chr10:::21549064	629.303	596.54	0.947938	-0.0771358	0.496527	0.830286	3.529	6.58386	2.58478	10.3605	0.187398	6.4075	0.121907	10.6693	0.330812	0.483958	32.8079	16.7008	8.62516
chr10	21565085	21566085	p300_6117:::chr10:::21565585	256.269	297.896	1.16244	0.217151	0.151671	0.400817	3.87521	4.41306	1.04125	6.5465	0.292147	3.96357	0.208078	4.3544	0.0367568	0.113873	15.8229	9.20693	8.26892
chr10	21566917	21567917	p300_6119:::chr10:::21567417	405.343	515.088	1.27074	0.345673	0.00516356	0.0315039	4.04442	4.54219	1.54864	7.30747	0.321908	5.268	0.304395	6.88243	0.0735137	0.185043	11.5195	4.73659	4.00478
chr10	21577105	21578105	p300_6122:::chr10:::21577605	72.998	76.222	1.04417	0.0623498	0.842063	1	2.60957	4.38369	1.81846	1.65211	0.402885	2.20741	0.411978	1.23822	0.0673875	0.0142341	4.75125	4.84786	2.52238
chr10	21586014	21587014	p300_6124:::chr10:::21586514	25.5715	46.5532	1.82051	0.864342	0.0252318	0.109467	3.74559	2.89358	1.14666	1.85678	0.479724	1.60636	0.510298	0.433377	0.0673875	0.0284681	6.03204	6.87197	4.12405
chr10	21774812	21775812	p300_6148:::chr10:::21775312	210.785	235.785	1.11861	0.161701	0.313448	0.639457	3.43781	2.42653	1.08321	4.33053	0.320221	2.25034	1.01176	3.5702	0.26955	0.113873	16.9312	16.2964	7.80391
chr10	22320584	22321584	p300_6164:::chr10:::22321084	3.02306	14.1029	4.66511	2.22191	0.0130715	0.0659798	2.06846	0.884518	0.668026	1.42332	0.508143	0.643388	1.29903	0.0515925	0	0	3.32921	4.23096	2.2369
chr10	22328493	22329493	p300_6166:::chr10:::22328993	57.9383	71.3225	1.23101	0.29984	0.292174	0.610284	3.50426	4.4772	1.64289	2.6833	0.402885	2.75668	0.666134	0.980257	0.042883	0.0284681	7.60714	6.61291	5.96656
chr10	22332153	22333153	DHS_27423:::chr10:::22332653	17.2515	32.5863	1.8889	0.917548	0.04408	0.166619	2.41616	1.56537	0.864046	1.63344	0.501899	0.907831	1.44083	0.288918	0.0673875	0.0142341	0.782928	4.49352	2.45491
chr10	22599161	22600161	p300_6173:::chr10:::22599661	0.582381	0	0	#NAME?	0.903996	1	3.33936	1.50095	0.636098	0.960324	1.87322	0.572856	1.29761	0.0103185	0	0	6.34018	3.11903	3.78665
chr10	23556388	23557388	DHS_27511:::chr10:::23556888	1.8583	4.8484	2.60906	1.38353	0.374428	0.708362	2.39434	0.798085	0.504428	1.35419	1.00002	0.960606	0.878419	0.0309555	0	0	2.1211	1.2367	1.54833
chr10	23697563	23698563	p300_6186:::chr10:::23698063	7.21088	28.6481	3.9729	1.99019	0.000745326	0.00637026	2.35762	1.02301	0.785067	1.39859	0.670374	0.798242	1.8787	0.123822	0.00612614	0	9.18175	3.72531	3.22243
chr10	23698855	23699855	p300_6187:::chr10:::23699355	11.6766	52.3968	4.48734	2.16586	7.6164e-07	1.7175e-05	1.91467	1.97095	1.35856	0.885185	0.520036	0.759745	0.709744	0.196051	0.0122523	0	5.24173	4.19031	5.62531
chr10	23805442	23806442	DHS_27541:::chr10:::23805942	0	0	NA	NA	NA	NA	2.64097	0.870927	0.808499	1.07787	0.612799	0.546087	0.66374	0	0	0	2.15854	1.13268	1.80485
chr10	23851837	23852837	p300_6189:::chr10:::23852337	213.144	252.1	1.18277	0.24217	0.119848	0.342045	4.67452	5.44377	2.3711	4.60494	0.519222	3.54816	0.642301	3.60115	0.202163	0.0854044	8.1464	6.694	6.52286
chr10	23911491	23912491	DHS_27555:::chr10:::23911991	61.8216	73.4065	1.18739	0.247796	0.366041	0.698266	2.6991	1.36223	0.689776	1.41088	1.0297	1.47966	0.620613	1.04217	0.0306307	0.0569363	1.39652	2.95945	1.98894
chr10	24044713	24045713	p300_6202:::chr10:::24045213	247.064	672.159	2.72058	1.44392	5.02393e-30	3.23437e-27	4.45247	1.68856	0.681534	4.22852	0.404366	1.05024	1.28178	4.16867	0.0796398	0.0427022	4.41548	2.22788	3.2457
chr10	24052284	24053284	DHS_27568:::chr10:::24052784	28.5946	125.803	4.39955	2.13735	6.9394e-14	7.89496e-12	2.43966	1.63659	0.689419	1.72351	0.55355	1.71699	0.595836	0.484969	0.0122523	0	1.52703	1.37723	3.36306
chr10	24077121	24078121	p300_6205:::chr10:::24077621	7.26646	8.08067	1.11205	0.153224	0.957639	1	2.34467	1.24387	0.405708	1.77139	0.391694	0.885323	0.456511	0.123822	0	0	3.6161	5.81499	2.99572
chr10	24118076	24119076	DHS_27573:::chr10:::24118576	6.68407	12.878	1.92667	0.946112	0.229944	0.527089	3.56351	0.995024	0.54148	1.74276	0.937642	0.200795	0.587952	0.113503	0.00612614	0.0284681	1.30959	2.03036	2.70196
chr10	24127331	24128331	p300_6206:::chr10:::24127831	5.57489	22.158	3.97461	1.99082	0.0027215	0.0187831	3.52938	1.05809	0.642927	1.38811	0.872141	1.27596	0.659322	0.0928664	0.0122523	0.0142341	4.00515	4.20335	3.02995
chr10	24240071	24241071	DHS_27578:::chr10:::24240571	1.16476	1.22486	1.0516	0.072586	1	1	2.88697	0.480027	0.56445	0.805135	0.69149	0.686693	0.993289	0.020637	0.0306307	0.0854044	1.88768	1.31102	0.928459
chr10	24277952	24278952	p300_6208:::chr10:::24278452	131.603	335.467	2.54908	1.34998	3.17054e-11	2.1367e-09	2.85118	2.64165	1.21922	3.68404	0.436308	1.25189	0.559746	2.21848	0.165406	0.284681	4.55713	7.8805	5.25789
chr10	24309996	24310996	p300_6211:::chr10:::24310496	88.8624	211.373	2.37866	1.25015	2.59783e-10	1.43788e-08	4.62184	2.41868	0.779364	4.27946	0.342997	1.1698	0.407159	1.5065	0.0367568	0.0427022	7.56007	6.91512	5.05375
chr10	24329287	24330287	p300_6213:::chr10:::24329787	15.0597	20.9842	1.3934	0.478611	0.419299	0.757217	3.02281	2.02585	0.41792	1.55699	0.572213	0.595918	0.44706	0.257962	0	0	4.68622	3.95206	4.13161
chr10	24335388	24336388	p300_6214:::chr10:::24335888	117.401	259.381	2.20935	1.14362	1.21372e-10	7.22226e-09	3.38559	2.2755	1.00684	2.03922	0.270306	1.49345	0.398796	1.99147	0.0183784	0.0142341	5.09153	5.61454	2.82055
chr10	24338472	24339472	DHS_27592:::chr10:::24338972	86.1728	132.03	1.53215	0.615557	0.00528885	0.0321147	2.42695	1.87012	1.50067	1.06831	0.550609	1.82405	0.901843	1.45491	0.085766	0.113873	1.09983	2.45279	2.29904
chr10	24342039	24343039	p300_6216:::chr10:::24342539	18.5274	83.7582	4.52078	2.17657	3.29612e-10	1.7805e-08	1.767	1.14301	0.832221	0.93623	0.574484	0.939973	0.355064	0.309555	0	0.0284681	3.96604	2.55043	3.85496
chr10	24344555	24345555	p300_6217:::chr10:::24345055	21.8549	43.7888	2.00361	1.0026	0.0142336	0.0704143	1.81661	3.00142	1.50549	1.59712	0.651208	1.74704	0.563466	0.371466	0.0122523	0	4.53529	5.28858	6.27011
chr10	24353554	24354554	DHS_27597:::chr10:::24354054	11.5099	34.5682	3.00336	1.58658	0.00149615	0.0114375	1.88717	1.96173	1.18059	0.989035	1.06617	1.53072	0.40243	0.196051	0.0245046	0.0711703	2.44108	2.58651	3.53267
chr10	24473771	24474771	p300_6222:::chr10:::24474271	36.7479	106.759	2.90516	1.53862	0.000837788	0.00703399	2.40127	6.3465	5.49739	1.47093	1.13294	2.93276	0.512057	0.629428	0.0735137	0.0284681	3.10606	3.65679	4.89933
chr10	24478186	24479186	DHS_27613:::chr10:::24478686	0.582381	2.841	4.87825	2.28636	0.416092	0.754197	2.25875	1.10939	0.500224	0.797467	1.01393	0.618321	0.809609	0.0103185	0	0	2.19965	2.88563	2.23335
chr10	24484634	24485634	DHS_27614:::chr10:::24485134	1.22034	3.20674	2.62775	1.39383	0.530158	0.855045	2.81333	0.706871	0.410127	0.824897	0.7924	0.632001	0.647542	0.020637	0.00612614	0	1.53295	1.34067	2.38042
chr10	24561536	24562536	DHS_27632:::chr10:::24562036	11.0942	16.7058	1.50581	0.59054	0.387373	0.72143	2.43471	0.854709	0.649181	1.06965	0.384073	1.41468	0.736915	0.185733	0.0122523	0	1.34804	2.24002	0.966134
chr10	24583951	24584951	DHS_27637:::chr10:::24584451	120.313	51.2824	0.42624	-1.23026	7.77057e-07	1.7485e-05	2.79414	2.28297	0.995828	5.15748	0.402052	1.47554	1.76972	2.04306	0.0490091	0.0284681	2.29055	5.13333	2.28004
chr10	24692341	24693341	DHS_27647:::chr10:::24692841	13.895	30.7066	2.20991	1.14399	0.0228734	0.101652	2.38444	1.69457	0.588499	2.60421	0.614658	0.975045	0.614893	0.237325	0	0	1.43824	2.3307	3.0317
chr10	24719705	24720705	p300_6236:::chr10:::24720205	0.582381	29.7198	51.0316	5.67332	7.26961e-09	2.81229e-07	2.73656	2.71375	1.11702	0.765638	1.32332	1.07374	0.48009	0.0103185	0	0	3.02029	3.14645	3.34245
chr10	24743302	24744302	p300_6237:::chr10:::24743802	0.582381	2.81547	4.83442	2.27334	0.417953	0.755615	3.86562	0.900747	0.566903	0.840674	1.00259	0.297815	0.908236	0.0103185	0	0.0142341	5.61517	4.72556	2.02484
chr10	24748845	24749845	p300_6238:::chr10:::24749345	20.9125	44.5458	2.13011	1.09092	0.00678358	0.0392453	3.75675	3.69565	1.40349	2.12313	0.542687	0.983072	0.875786	0.350829	0.0122523	0	5.02729	7.45531	5.74397
chr10	24831079	24832079	p300_6241:::chr10:::24831579	26.2095	32.1695	1.2274	0.295606	0.498662	0.832587	4.06103	2.02873	0.81241	1.49806	0.960664	0.698382	0.634491	0.443695	0.0183784	0	6.25718	2.77642	6.21016
chr10	24838689	24839689	p300_6242:::chr10:::24839189	17.0292	65.2748	3.83312	1.93852	3.65264e-07	8.97488e-06	3.80934	4.0134	1.99917	1.17717	0.580628	1.1245	0.372754	0.288918	0.042883	0.0142341	2.56626	3.36657	2.79491
chr10	24841749	24842749	DHS_27661:::chr10:::24842249	20.7458	53.0178	2.55559	1.35366	0.000476275	0.00438481	4.02743	1.3594	0.638231	1.43896	0.635537	0.762015	0.737583	0.350829	0.0245046	0.0284681	2.27711	0.995747	1.94285
chr10	24843854	24844854	p300_6243:::chr10:::24844354	3.71659	27.7379	7.46327	2.89981	1.8804e-05	0.000280043	2.28332	1.41561	0.587168	1.35827	0.523203	0.969449	0.77905	0.061911	0	0	2.71722	2.0565	2.18461
chr10	24849083	24850083	p300_6244:::chr10:::24849583	4.13224	6.41349	1.55206	0.634184	0.645309	0.93574	4.33479	0.894358	0.598869	1.08574	0.664671	0.40041	1.13769	0.0722294	0	0	2.44191	1.86867	1.8838
chr10	24859613	24860613	p300_6245:::chr10:::24860113	38.9397	66.5762	1.70973	0.773766	0.0146368	0.0719256	4.02893	3.17033	0.928107	1.2739	0.691115	0.923815	1.24194	0.660383	0.0490091	0.0284681	5.11224	4.19158	3.27136
chr10	25033597	25034597	p300_6262:::chr10:::25034097	76.1878	84.5408	1.10964	0.150087	0.560957	0.880374	5.91344	4.07703	1.46757	5.75672	0.423029	1.76511	0.201762	1.28981	0.0367568	0.0142341	15.6622	7.38542	6.1643
chr10	25039093	25040093	DHS_27707:::chr10:::25039593	1.80272	14.9875	8.31385	3.05552	0.00189767	0.0139267	3.57779	1.05029	0.759743	1.70939	0.554792	1.22397	0.46747	0.0309555	0	0	2.36643	2.11101	2.48749
chr10	25305699	25306699	DHS_27743:::chr10:::25306199	1.8583	6.38796	3.43754	1.78138	0.181049	0.451362	4.36114	1.09936	0.447366	1.45836	0.625292	0.616922	2.53191	0.0309555	0	0	1.35861	1.2339	1.8101
chr10	25308115	25309115	p300_6275:::chr10:::25308615	28.5946	109.667	3.83525	1.93932	5.62506e-11	3.60508e-09	3.3208	2.50837	0.863276	3.06684	0.575444	1.40827	1.77234	0.484969	0.0183784	0	7.89692	6.90643	4.15856
chr10	25351824	25352824	p300_6276:::chr10:::25352324	6.6285	30.7831	4.64406	2.21539	0.000163966	0.00178688	4.89551	1.15907	0.461137	1.87071	0.841849	0.678307	0.578183	0.113503	0	0	6.43481	3.91929	5.28436
chr10	25427443	25428443	p300_6277:::chr10:::25427943	32.2	56.0969	1.74214	0.800858	0.0212883	0.0962379	2.01845	3.30156	2.4717	1.93378	1.2014	1.29847	0.809199	0.54688	0.0980183	0.0427022	4.98882	3.15111	6.78677
chr10	25627813	25628813	DHS_27776:::chr10:::25628313	1.22034	2.78995	2.28621	1.19296	0.637412	0.933728	2.52307	0.63394	0.404593	0.82756	0.721835	0.425096	0.46117	0.020637	0.0122523	0	1.37478	0.901761	2.46326
chr10	25647896	25648896	p300_6282:::chr10:::25648396	12.7302	21.35	1.67711	0.74598	0.197122	0.47821	1.95334	1.84661	0.478393	2.31377	0.914289	0.900555	1.02747	0.216688	0	0	4.69378	2.7367	2.80335
chr10	25678396	25679396	p300_6283:::chr10:::25678896	2.44068	0.808067	0.331083	-1.59473	0.549576	0.869926	3.41506	1.42877	0.592957	1.16497	1.22493	0.950903	0.717375	0.041274	0.0122523	0	13.7645	6.27407	3.55306
chr10	25703565	25704565	p300_6286:::chr10:::25704065	6.10169	0.833592	0.136617	-2.8718	0.0547615	0.195343	2.57914	1.31278	0.343291	1.75543	0.564039	0.541031	1.13584	0.103185	0.0490091	0.0142341	2.69458	1.68329	3.67846
chr10	25914390	25915390	p300_6288:::chr10:::25914890	0	6.46454	Inf	Inf	0.0139549	0.0693192	3.75291	1.78953	0.652081	1.88951	0.552701	0.424125	1.08147	0	0	0	7.54404	5.17674	2.70339
chr10	26212424	26213424	DHS_27823:::chr10:::26212924	1.80272	6.07327	3.36895	1.7523	0.21785	0.50836	2.78503	0.691098	0.709093	0.89786	0.924654	1.02885	1.04666	0.0309555	0	0	1.51452	2.31797	3.54278
chr10	26213751	26214751	DHS_27824:::chr10:::26214251	1.22034	6.88134	5.63887	2.49541	0.0826185	0.262598	2.4244	1.32012	1.07015	1.0768	0.5987	1.12438	0.516991	0.020637	0.00612614	0	1.93545	3.72392	3.08251
chr10	26240111	26241111	p300_6298:::chr10:::26240611	14.4773	33.9133	2.34251	1.22806	0.0110164	0.0575428	4.83848	2.64337	1.06802	0.949233	0.539667	1.33588	0.619954	0.247644	0	0	5.32262	3.61595	3.17892
chr10	26328526	26329526	p300_6301:::chr10:::26329026	6.6285	5.682	0.857207	-0.222284	0.881946	1	3.80934	1.06045	0.575518	2.40081	0.40091	0.318253	2.14158	0.113503	0.00612614	0	6.22696	4.60428	1.75809
chr10	26354107	26355107	DHS_27839:::chr10:::26354607	8.7091	14.0774	1.6164	0.692782	0.317398	0.644101	7.13187	1.2869	0.370754	2.75954	0.394827	0.735802	0.645638	0.144459	0.0490091	0.0569363	4.31132	4.84786	4.04631
chr10	26357584	26358584	p300_6303:::chr10:::26358084	100.428	102.752	1.02314	0.0330096	0.922323	1	5.44504	5.93285	1.97833	7.7683	0.33441	1.07778	1.19941	1.70255	0.085766	0.0569363	9.129	8.74244	4.41634
chr10	26372607	26373607	p300_6304:::chr10:::26373107	13.0081	24.5057	1.88388	0.913708	0.0819977	0.261545	5.92683	1.44431	0.5538	5.11228	0.419038	0.796234	0.771517	0.216688	0.0122523	0.0284681	9.36928	7.57479	4.48964
chr10	26419893	26420893	DHS_27848:::chr10:::26420393	1.22034	0.808067	0.662166	-0.594734	1	1	3.45262	0.70067	0.357746	1.13087	0.80895	0.375874	0.883504	0.020637	0.042883	0	0.972479	1.91363	1.45203
chr10	26421364	26422364	p300_6307:::chr10:::26421864	0.637958	0.808067	1.26665	0.341015	1	1	2.49679	0.658703	0.933323	0.970973	0.749114	0.541031	0.717375	0.0103185	0.0183784	0.0142341	2.88705	1.26246	1.07768
chr10	26472043	26473043	DHS_27853:::chr10:::26472543	9.12475	16.5526	1.81403	0.859202	0.203171	0.485474	1.84506	2.69774	1.71494	1.23885	0.52801	1.31563	0.559363	0.154777	0.0122523	0	2.23842	3.20343	2.36994
chr10	26659046	26660046	p300_6311:::chr10:::26659546	3.49429	2.81547	0.805736	-0.31162	0.92686	1	8.71149	0.827907	0.36891	1.69779	0.413909	0.581406	2.24849	0.061911	0	0	4.36648	2.11039	2.40198
chr10	26669243	26670243	DHS_27876:::chr10:::26669743	2.44068	10.8961	4.46439	2.15846	0.0354338	0.141242	2.50865	1.21716	0.882749	1.2278	0.878289	1.37267	1.1437	0.041274	0	0	1.71573	2.59707	2.2859
chr10	26678059	26679059	p300_6312:::chr10:::26678559	1.74714	13.3203	7.62408	2.93056	0.00490145	0.0302145	6.50011	1.20341	0.768041	4.62363	0.398332	0.476841	2.77223	0.0309555	0	0	10.439	6.67609	4.59808
chr10	27372049	27373049	DHS_27899:::chr10:::27372549	1.80272	4.04034	2.24125	1.1643	0.530165	0.855045	2.99127	1.25236	0.54148	1.1727	0.545141	0.769714	0.565765	0.0309555	0	0	2.02391	1.56181	1.27988
chr10	27691020	27692020	DHS_27914:::chr10:::27691520	4.2434	13.9158	3.27941	1.71343	0.141228	0.382983	3.64443	1.26068	0.561749	1.35647	0.911578	0.819744	0.456511	0.0722294	0	0	1.16648	2.44842	2.02037
chr10	27706561	27707561	DHS_27915:::chr10:::27707061	30.5085	92.4854	3.03147	1.60002	1.56113e-07	4.23526e-06	3.72089	1.1206	0.395305	2.24482	0.332346	0.765094	0.514481	0.515925	0.0122523	0.0142341	1.71084	2.24438	2.27582
chr10	27708445	27709445	DHS_27917:::chr10:::27708945	14.8108	52.0565	3.51477	1.81343	1.261e-05	0.000198055	3.42079	1.25898	0.601724	2.44971	0.41722	0.97264	1.41057	0.247644	0.0122523	0	1.98958	2.15612	2.16988
chr10	27710471	27711471	DHS_27918:::chr10:::27710971	82.9541	177.128	2.13526	1.09441	1.93313e-07	5.13154e-06	3.8253	3.78984	1.31558	5.1168	0.277471	2.65978	2.11741	1.41363	0.0367568	0	3.27819	3.32313	3.73779
chr10	27713856	27714856	p300_6314:::chr10:::27714356	48.2867	123.371	2.55496	1.3533	1.24766e-07	3.48302e-06	4.53789	1.62818	0.689052	8.16086	0.344916	0.700615	1.89666	0.815161	0.0122523	0.0142341	14.8714	11.9889	6.74826
chr10	27719854	27720854	DHS_27924:::chr10:::27720354	6.57292	17.9051	2.72407	1.44576	0.0515228	0.186961	4.43306	0.82427	0.433124	1.09263	0.336051	0.455073	0.6034	0.113503	0.0183784	0.0284681	1.07927	0.849509	1.35364
chr10	27727890	27728890	DHS_27925:::chr10:::27728390	79.322	127.266	1.60443	0.682056	0.00261341	0.0181633	5.27124	3.17972	0.872904	3.12454	0.435086	1.3033	0.600035	1.3414	0.0245046	0.0427022	2.74752	3.15382	3.07678
chr10	27731654	27732654	p300_6315:::chr10:::27732154	49.5893	105.1	2.11941	1.08366	5.43604e-05	0.000697697	6.11494	2.38058	0.793861	6.52801	0.391694	1.14969	1.04617	0.846116	0.0367568	0.0142341	9.3829	4.52383	2.29904
chr10	27733992	27734992	p300_6317:::chr10:::27734492	139.616	212.76	1.52389	0.607757	0.000780117	0.00661754	7.44158	2.79723	0.793443	10.3891	0.290798	1.01049	0.443824	2.37325	0.0673875	0.0427022	20.4003	14.3833	5.31374
chr10	27748125	27749125	DHS_27934:::chr10:::27748625	1.16476	17.8541	15.3285	3.93815	0.000116113	0.00133284	3.04436	1.16899	0.791556	0.874814	0.483628	0.697527	0.533585	0.020637	0	0	2.09967	1.87805	2.56504
chr10	27789012	27790012	DHS_27935:::chr10:::27789512	1.74714	4.01481	2.29793	1.20033	0.534149	0.857798	4.05827	0.810034	0.425027	0.869356	0.731161	0.618321	0.421316	0.0309555	0	0	2.44406	2.08407	1.89762
chr10	28355588	28356588	p300_6334:::chr10:::28356088	7.84884	15.9061	2.02655	1.01903	0.341992	0.673056	3.55843	1.35249	0.369277	2.17785	0.438197	0.620784	0.471581	0.13414	0.0122523	0	15.643	10.14	5.88041
chr10	28366626	28367626	DHS_27974:::chr10:::28367126	0	1.22486	Inf	Inf	0.6354	0.933728	2.25466	0.495687	0.821708	1.19332	0.937564	0.656144	0.744086	0	0	0	1.59709	1.45049	1.32073
chr10	28928156	28929156	DHS_28016:::chr10:::28928656	7.26646	11.2364	1.54633	0.628852	0.456996	0.795085	3.08049	0.541797	0.323332	0.789944	0.631264	0.641688	0.312809	0.123822	0.0490091	0.113873	1.34281	2.11389	1.04259
chr10	29314443	29315443	p300_6350:::chr10:::29314943	0	0.416796	Inf	Inf	1	1	4.34274	0.867345	0.449399	1.14901	1.12808	0.590215	0.469555	0	0	0	3.63943	4.95804	3.59486
chr10	29497500	29498500	p300_6351:::chr10:::29498000	3.66102	3.20674	0.875916	-0.191135	1	1	4.39502	0.622693	0.597991	1.20275	0.846058	0.753953	0.347117	0.061911	0	0	5.0663	2.34574	4.18277
chr10	29575266	29576266	p300_6352:::chr10:::29575766	1.22034	12.5378	10.274	3.36093	0.00306681	0.020696	3.35437	0.577142	0.285745	0.858436	1.51606	0.187641	0.497601	0.020637	0.0735137	0.0142341	4.53917	2.62709	3.10968
chr10	29651759	29652759	DHS_28047:::chr10:::29652259	0.582381	9.25449	15.8908	3.99012	0.00803096	0.0448936	4.86804	0.763525	0.436182	1.00369	0.481092	0.267333	0.822872	0.0103185	0.00612614	0	2.17378	3.38638	2.35314
chr10	30086222	30087222	p300_6356:::chr10:::30086722	3.18979	2.4242	0.759988	-0.395951	0.976022	1	3.66092	1.02782	0.575518	1.50244	0.718873	0.604682	1.20266	0.0515925	0	0	5.20801	5.19838	2.90761
chr10	30090020	30091020	p300_6357:::chr10:::30090520	4.2434	4.40608	1.03834	0.0542769	1	1	5.73537	1.44492	0.663138	2.91316	0.467739	0.633402	2.01565	0.0722294	0.00612614	0	12.5058	6.94664	6.99805
chr10	30108361	30109361	DHS_28080:::chr10:::30108861	1.80272	4.38056	2.42997	1.28094	0.450947	0.788552	4.83588	0.72804	0.675854	0.87223	0.558163	0.473402	0.54924	0.0309555	0.00612614	0	1.20294	1.73589	1.36506
chr10	30358027	30359027	DHS_28105:::chr10:::30358527	25.6827	50.517	1.96697	0.975972	0.0089049	0.0487117	1.94438	1.00762	0.255106	1.50742	0.627428	0.416941	0.691049	0.433377	0.00612614	0.0711703	1.48325	0.694935	1.51863
chr10	30360303	30361303	p300_6362:::chr10:::30360803	60.8236	92.511	1.52097	0.604993	0.018911	0.087862	4.02765	1.45036	0.340142	1.78281	0.407505	0.923227	0.41463	1.02153	0.0245046	0.170809	8.26384	4.3086	2.97399
chr10	31017398	31018398	DHS_28156:::chr10:::31017898	0.637958	0.808067	1.26665	0.341015	1	1	2.36802	0.52061	0.345209	0.688443	0.882295	0.580324	0.468899	0.0103185	0	0	1.54836	1.18488	0.924754
chr10	31022993	31023993	DHS_28160:::chr10:::31023493	4.2434	15.8211	3.72841	1.89856	0.0180278	0.084761	2.90869	2.67417	1.34918	1.42121	0.954432	1.21909	1.01498	0.0722294	0.00612614	0	2.21887	2.24928	1.50592
chr10	31176327	31177327	p300_6382:::chr10:::31176827	26.2095	84.7621	3.23402	1.69333	4.02807e-06	7.35831e-05	4.39448	3.03063	0.900287	4.96985	0.373536	0.773925	0.45608	0.443695	0.00612614	0	13.4601	9.73185	6.80577
chr10	31370953	31371953	DHS_28182:::chr10:::31371453	0.637958	7.6894	12.0532	3.59134	0.0220155	0.0987659	4.11275	1.15428	0.321463	1.24199	0.497202	0.938204	0.833482	0.0103185	0	0	1.06804	2.27682	2.15286
chr10	32662567	32663567	p300_6394:::chr10:::32663067	2.32952	7.29813	3.13289	1.64749	0.196827	0.477624	4.90597	0.628657	0.240304	2.15918	0.360358	0.504962	3.07276	0.041274	0.00612614	0	5.00421	3.36657	2.45231
chr10	33671964	33672964	p300_6414:::chr10:::33672464	49.9783	70.8036	1.41669	0.502521	0.0857599	0.269082	1.95755	1.56367	1.11866	0.708226	0.474084	1.65108	0.435991	0.846116	0.0183784	0	2.09062	1.8284	1.90265
chr10	33680589	33681589	DHS_28298:::chr10:::33681089	1.80272	4.35503	2.41581	1.27251	0.482886	0.814712	4.90976	1.01944	0.306179	0.953626	0.571661	0.526408	0.504101	0.0309555	0.00612614	0	2.28883	3.00262	1.67768
chr10	33753418	33754418	p300_6417:::chr10:::33753918	83.4543	98.3461	1.17844	0.236882	0.340354	0.670706	1.96651	5.09016	2.74885	0.929346	0.953889	2.60172	0.300665	1.41363	0.0245046	0	4.67022	6.34946	6.54212
chr10	33859252	33860252	p300_6421:::chr10:::33859752	14.3662	17.752	1.23568	0.305302	0.672666	0.954355	3.30032	1.38806	1.20071	1.21299	0.75517	0.830777	0.622178	0.247644	0.0306307	0	4.59738	3.01556	3.92253
chr10	33941605	33942605	p300_6425:::chr10:::33942105	67.092	142.203	2.11952	1.08374	3.18747e-05	0.000441556	4.91507	2.0459	0.695499	2.20227	0.360155	1.40527	0.27018	1.12472	0.0490091	0.0569363	2.99953	2.75447	4.23979
chr10	33943182	33944182	p300_6426:::chr10:::33943682	35.9166	101.059	2.81372	1.49248	2.2704e-07	5.9047e-06	7.13419	2.03708	0.639232	1.68885	0.39507	2.77045	0.296845	0.608791	0	0	3.78303	1.959	4.04314
chr10	33947639	33948639	DHS_28333:::chr10:::33948139	62.5684	103.382	1.6523	0.724473	0.0209649	0.0951111	4.41984	1.81752	0.788839	3.78725	0.310021	1.97994	1.27449	1.07312	0.085766	0.142341	1.31043	1.7191	2.4947
chr10	33953421	33954421	p300_6429:::chr10:::33953921	104.671	173.658	1.65908	0.730383	0.00026287	0.00266159	4.6759	4.5853	2.31722	8.44038	0.272057	2.50521	0.456157	1.77478	0.140901	0.128107	27.678	15.0672	9.03373
chr10	33960135	33961135	DHS_28338:::chr10:::33960635	5.57489	19.317	3.46501	1.79286	0.00966382	0.0520605	3.67896	0.78696	0.334836	0.965055	0.472348	0.895499	0.254438	0.0928664	0	0.0142341	1.25153	1.49257	1.76675
chr10	33966889	33967889	p300_6431:::chr10:::33967389	37.6082	55.1867	1.46741	0.553274	0.103422	0.308417	3.91611	2.21022	1.00204	1.59819	0.636994	1.05282	0.52349	0.639747	0	0.0284681	6.06391	4.44544	4.04773
chr10	34000055	34001055	DHS_28343:::chr10:::34000555	14.0061	16.5016	1.17817	0.236547	0.73537	1	3.77435	2.46232	1.15547	1.24593	0.395515	1.6099	0.11373	0.237325	0.0122523	0.0142341	1.78387	2.21701	2.97193
chr10	34166653	34167653	p300_6441:::chr10:::34167153	4.99251	14.0774	2.8197	1.49554	0.0563166	0.199479	5.26448	1.37608	0.772405	1.30645	0.399979	0.405773	0.538031	0.0825479	0	0	6.77346	6.40944	3.78015
chr10	34337968	34338968	DHS_28369:::chr10:::34338468	1.22034	6.88134	5.63887	2.49541	0.0826185	0.262598	3.29603	0.711808	0.535772	1.7534	0.456448	0.337753	0.982763	0.020637	0	0	1.86907	2.27682	2.63127
chr10	34391272	34392272	p300_6444:::chr10:::34391772	0	0	NA	NA	NA	NA	4.34076	0.41155	0.365439	0.849402	0.470032	0.209431	0.520676	0	0	0	3.72522	3.58377	1.48325
chr10	34735934	34736934	DHS_28384:::chr10:::34736434	11.621	13.635	1.17331	0.230584	0.764792	1	2.82584	1.26471	1.11226	3.61794	0.373676	0.35708	3.89535	0.196051	0.00612614	0.0284681	3.46446	2.42393	3.03473
chr10	35504744	35505744	DHS_28449:::chr10:::35505244	0	0.416796	Inf	Inf	1	1	3.07607	0.319141	0.296265	0.865692	0.618125	0.133405	1.0908	0	0	0	2.21472	1.03764	0.944811
chr10	35722488	35723488	DHS_28466:::chr10:::35722988	0	0.782542	Inf	Inf	0.849188	1	2.97421	0.793474	0.245533	1.31832	0.616334	0.214979	0.627109	0	0	0	2.4473	5.61839	2.64923
chr10	35797754	35798754	DHS_28468:::chr10:::35798254	0	3.25779	Inf	Inf	0.146762	0.392936	2.78621	0.775896	0.530732	0.969256	0.614214	0.398305	0.831803	0	0	0	1.98374	2.04473	2.96195
chr10	36024251	36025251	DHS_28484:::chr10:::36024751	0	0	NA	NA	NA	NA	3.36409	0.896958	0.482068	1.45663	0.790054	0.644632	1.52633	0	0	0	3.27608	5.1573	3.22844
chr10	36565874	36566874	DHS_28514:::chr10:::36566374	1.16476	1.19934	1.02969	0.0422039	1	1	3.31519	0.696597	0.574813	1.01039	0.647661	0.566195	1.45143	0.020637	0.00612614	0	1.87994	0.704632	1.84458
chr10	36643617	36644617	p300_6471:::chr10:::36644117	6.57292	36.2865	5.5206	2.46482	1.07922e-05	0.000173328	2.51383	1.28007	0.724307	2.53477	0.41838	0.594539	1.67913	0.113503	0.00612614	0	9.22163	5.66028	2.42536
chr10	36648193	36649193	DHS_28522:::chr10:::36648693	5.40816	29.3796	5.43246	2.44161	8.45914e-05	0.0010168	3.82135	1.47022	0.629923	1.07371	0.828261	0.69336	0.522361	0.0928664	0	0	1.45754	3.53	3.21419
chr10	36655409	36656409	p300_6473:::chr10:::36655909	13.5349	48.3225	3.57022	1.83601	0.000286008	0.00285465	6.8811	2.08912	0.481499	1.62776	0.628744	1.29285	0.307446	0.227007	0	0	6.9989	6.0336	4.53837
chr10	36735253	36736253	p300_6478:::chr10:::36735753	49.3959	96.0579	1.94465	0.959512	0.000409616	0.00387106	4.17856	2.32389	0.823899	1.51891	0.5393	2.14134	0.362463	0.835798	0.00612614	0.0284681	9.48167	4.35883	3.96887
chr10	36791652	36792652	p300_6479:::chr10:::36792152	3.60544	21.1119	5.85556	2.54981	0.000752096	0.00641446	2.26067	1.03839	0.494339	0.821542	0.315862	0.623268	0.559553	0.061911	0	0	2.67918	2.90872	1.48978
chr10	36832502	36833502	p300_6482:::chr10:::36833002	5.63047	13.5074	2.39899	1.26243	0.326867	0.656965	3.86713	1.24418	0.664124	1.38794	0.60621	0.758454	0.492776	0.0928664	0	0	3.02196	2.8317	1.99823
chr10	36932151	36933151	p300_6486:::chr10:::36932651	32.3112	49.6323	1.53607	0.619246	0.0839929	0.264962	7.41665	3.51394	0.488591	3.58598	0.537804	1.41926	0.170168	0.54688	0.00612614	0	10.2054	9.30114	3.97787
chr10	36933968	36934968	DHS_28562:::chr10:::36934468	10.2895	43.9759	4.27385	2.09554	1.15829e-05	0.000184114	5.49062	2.03485	0.480252	1.4571	0.452984	1.11009	0.36798	0.175414	0	0	2.27374	2.51185	2.00124
chr10	36938063	36939063	DHS_28564:::chr10:::36938563	1.22034	13.7116	11.2359	3.49005	0.00147479	0.0113031	5.3291	0.699852	0.490874	1.46177	0.744584	0.788793	0.462606	0.020637	0	0	2.59025	3.25645	2.44944
chr10	36940033	36941033	p300_6487:::chr10:::36940533	8.43122	16.1869	1.91987	0.941011	0.181274	0.451686	3.79922	0.809558	0.548736	2.18378	0.332108	1.22829	0.565037	0.144459	0.00612614	0	2.85361	2.3397	2.29016
chr10	36942659	36943659	p300_6488:::chr10:::36943159	36.7769	58.8613	1.6005	0.67852	0.037851	0.148341	3.10229	2.08497	0.601093	2.48356	0.279825	1.08627	0.326587	0.61911	0.0183784	0.0142341	5.21241	3.89055	2.25431
chr10	36950640	36951640	p300_6489:::chr10:::36951140	15.8088	58.5211	3.7018	1.88823	2.34748e-06	4.59392e-05	5.11402	2.17899	0.803578	1.7145	0.448955	1.77594	0.289524	0.268281	0.00612614	0	16.675	5.97831	3.52588
chr10	36959723	36960723	p300_6491:::chr10:::36960223	1.27592	2.4242	1.89997	0.925977	0.754796	1	2.30681	1.09355	0.470799	1.53475	0.496891	0.680153	0.5739	0.020637	0	0	4.06936	6.92552	3.35003
chr10	37042357	37043357	p300_6493:::chr10:::37042857	1.80272	5.18863	2.87822	1.52518	0.317787	0.644606	2.32579	0.794382	0.559437	1.37834	0.539667	0.641222	0.65538	0.0309555	0	0	5.32262	2.36907	2.15712
chr10	37096043	37097043	DHS_28579:::chr10:::37096543	0	4.09139	Inf	Inf	0.0806801	0.258956	5.32093	0.741427	0.458855	1.2514	0.439783	0.353545	0.554013	0	0	0	1.71508	1.49996	1.98036
chr10	37097375	37098375	p300_6496:::chr10:::37097875	7.84884	28.3079	3.60663	1.85065	0.00145005	0.0111493	6.84476	2.27371	0.397674	2.03352	0.446763	0.449966	0.340931	0.13414	0	0.0142341	3.43015	7.0498	4.16559
chr10	37116756	37117756	p300_6497:::chr10:::37117256	20.5235	45.0392	2.19452	1.13391	0.00614991	0.0362482	3.03661	5.69915	3.3357	1.03462	0.948384	1.83855	0.371384	0.350829	0.00612614	0	11.5482	4.02201	5.55432
chr10	37192585	37193585	p300_6498:::chr10:::37193085	1.27592	5.29073	4.14661	2.05193	0.193043	0.4727	3.77826	1.0202	0.558926	0.793913	0.687334	0.1305	0.962508	0.020637	0	0	3.24974	3.80643	2.63408
chr10	37271016	37272016	DHS_28587:::chr10:::37271516	1.22034	6.90686	5.65979	2.50075	0.082212	0.261818	4.69813	0.826308	1.15062	3.07261	0.359818	0.402975	2.6716	0.020637	0	0	1.27428	2.92544	3.04425
chr10	37278355	37279355	DHS_28589:::chr10:::37278855	0.582381	1.19934	2.05937	1.0422	0.974054	1	5.92628	0.696597	0.287407	1.39618	0.459101	0.150985	0.538031	0.0103185	0	0	1.47709	1.23311	1.68418
chr10	37386482	37387482	p300_6500:::chr10:::37386982	7.21088	6.88134	0.954299	-0.0674866	1	1	3.3892	1.15907	0.553365	1.03754	0.624371	0.90441	0.535355	0.123822	0.0306307	0.0569363	9.07768	5.42671	3.08826
chr10	37561228	37562228	p300_6502:::chr10:::37561728	3.07864	3.23227	1.0499	0.0702565	1	1	5.37654	0.95091	0.441374	1.10968	0.646294	0.541031	0.371498	0.0515925	0	0	5.0867	6.31232	3.20223
chr10	38273297	38274297	p300_6507:::chr10:::38273797	12.6746	20.2783	1.59991	0.677992	0.264038	0.575522	4.65443	3.70811	2.5112	1.31297	0.817727	1.80838	0.314466	0.216688	0.0122523	0	3.48028	4.01222	5.35393
chr10	38614345	38615345	p300_6512:::chr10:::38614845	3.66102	4.40608	1.20351	0.267252	0.937101	1	3.60799	0.615714	0.463443	0.837341	0.507635	0.714161	0.968456	0.061911	0	0	4.15735	3.18141	1.93119
chr10	38833948	38834948	p300_6520:::chr10:::38834448	12.3701	20.6185	1.6668	0.737079	0.195521	0.476398	1.75728	1.07395	0.454066	1.11046	0.621704	0.746726	0.776965	0.20637	0	0.0142341	3.24677	2.71047	1.80691
chr10	38890595	38891595	p300_6527:::chr10:::38891095	28.4279	47.9141	1.68546	0.753144	0.0452823	0.169841	3.15908	4.84016	4.3306	1.47923	0.726532	1.60061	0.250386	0.484969	0.0490091	0	5.56616	3.27332	4.50892
chr10	38929195	38930195	p300_6530:::chr10:::38929695	11.1498	20.2783	1.81871	0.862919	0.141676	0.383922	3.58636	1.52146	0.639993	1.3429	0.649652	1.22891	1.20673	0.185733	0	0	4.53679	3.89561	2.66032
chr10	38947143	38948143	p300_6532:::chr10:::38947643	4.99251	14.5707	2.91852	1.54524	0.0472989	0.175286	5.16441	2.73015	1.13447	1.18492	1.73508	1.92742	0.849081	0.0825479	0	0	7.30784	4.49753	3.71798
chr10	38950462	38951462	p300_6533:::chr10:::38950962	3.60544	12.9036	3.57891	1.83952	0.0398619	0.154611	3.79817	2.23072	1.0188	1.43832	0.571114	0.791185	1.39618	0.061911	0	0.0142341	5.79479	5.75575	3.85645
chr10	38952637	38953637	DHS_28696:::chr10:::38953137	14.3106	20.6185	1.44078	0.526853	0.438222	0.778501	1.72071	2.39731	0.923335	1.45277	0.723958	1.194	1.34405	0.247644	0.0245046	0.0427022	3.2742	3.71484	2.06121
chr10	38959366	38960366	p300_6534:::chr10:::38959866	32.7268	49.105	1.50045	0.585397	0.112921	0.327348	1.80955	3.32818	1.8916	1.16073	1.09354	1.96853	0.38274	0.557199	0.00612614	0	2.9628	3.44509	7.27918
chr10	38993676	38994676	p300_6536:::chr10:::38994176	3.60544	4.04034	1.12062	0.1643	1	1	2.20355	0.973748	0.431737	2.04213	0.911329	0.992284	0.657855	0.061911	0	0	3.93344	1.98466	2.04805
chr10	39291121	39292121	p300_6551:::chr10:::39291621	19.581	71.3991	3.64635	1.86645	2.08307e-07	5.46574e-06	3.86229	3.47459	1.1235	1.93664	0.897334	1.98008	0.391296	0.330192	0.00612614	0.0142341	3.38656	3.64301	1.94171
chr10	39301900	39302900	DHS_28773:::chr10:::39302400	30.3973	46.5277	1.53065	0.614146	0.101548	0.305013	1.62197	1.18864	0.541687	0.738649	0.879021	0.906402	0.782591	0.515925	0.0183784	0	1.79972	2.36097	2.10497
chr10	39309629	39310629	DHS_28774:::chr10:::39310129	32.7558	80.4239	2.45526	1.29587	0.000747496	0.00638458	2.3686	3.82911	1.73397	1.37837	0.791381	2.96463	0.752146	0.54688	0.00612614	0.0142341	2.76921	3.09175	2.92072
[truncated: 20,119 more rows]
