# Supplementary material for: KDM1A maintains genome-wide homeostasis of transcriptional enhancers
Source: HighWire-hosted journal article supplement (doi:10.1101/gr.234559.118), 2021-01-07
Supplement: Supplementary_Table_S3.xlsx [file Supplementary_Table_S3.xlsx]

## Sheet: Sheet1
Supplemental_Table_S3
Find Individual Motif Occurrences (FIMO) analysis of 13,937 KDM1A-bound enhancers.
	Motifs	Total Motif Hits	Unique Motif Hits
#0	CTCFL_MOUSE.H11MO.0.A	10153	6597
#1	CTCF_MOUSE.H11MO.0.A	9344	6376
#2	ESR1_MOUSE.H11MO.1.A	5789	4663
#3	ESR2_MOUSE.H11MO.0.A	7048	5388
#4	FOXA1_MOUSE.H11MO.0.A	1510	1420
#5	FOXA2_MOUSE.H11MO.0.A	1749	1624
#6	FOXD1_MOUSE.H11MO.0.D	1435	1367
#7	FOXD3_MOUSE.H11MO.0.C	4523	3809
#8	GATA2_MOUSE.H11MO.0.A	1738	1620
#9	HMGA2_MOUSE.H11MO.0.D	363	332
#10	HNF4A_MOUSE.H11MO.0.A	4485	3772
#11	KLF4_MOUSE.H11MO.0.A	29391	10418
#12	NANOG_MOUSE.H11MO.0.A	5472	4468
#13	NANOG_MOUSE.H11MO.1.A	2459	2235
#14	NR5A2_MOUSE.H11MO.0.A	6784	5280
#15	PO5F1_MOUSE.H11MO.0.A	4752	3990
#16	PO5F1_MOUSE.H11MO.1.A	2583	2260
#17	REST_MOUSE.H11MO.0.A	5417	4298
#18	SOX2_MOUSE.H11MO.0.A	4974	4177
#19	SOX2_MOUSE.H11MO.1.A	6745	4993
a. Sox2, Pou5f1 and Nanog, they account for 9,562 enhancers.
b. Sox2, Pou5f1 and Nanog + CTCF = 12,413
c. Sox2, Pou5f1 and Nanog + ESRs + NR5a2 = 12,646
d. Sox2, Pou5f1 and Nanog + CTCF + ESRs + NR5a2 = 13,851
These seven TFs can account for almost all the KDM1A-bound enhancers.
