# Supplementary material for: KDM1A maintains genome-wide homeostasis of transcriptional enhancers
Source: HighWire-hosted journal article supplement (doi:10.1101/gr.234559.118), 2021-01-07
Supplement: Supplementary_Table_S4.docx [file Supplementary_Table_S4.docx]

| **RNA** | **H3K27ac**  **State** | **Genomic location of PCR fragment**  **(*mm9*)** | **Oligonucleotide sequence ( 5' - 3' )** | |
| --- | --- | --- | --- | --- |
| *Tbp* mRNA | n/a | chr17:15654187 -15654354 | F | CAGATACATTCCGCCTTCCCAGTATTG |
| R | GACAGTATGATCACATGACTTACAAGGT |
| eRNA #1 | Active | chr7:62,024,311-62,024,411 | F | CTGCTGCTGCAGTTTGCTATTA |
| R | GCTCATTGGCAGAAGTCCAAC |
| eRNA #2 | Active | chr14:52,685,637-52,685,707 | F | CCCCAGAGAAACAGGACTCAC |
| R | GCACTTATTCCATAGGTCACTGCT |
| eRNA #3 | Active | chr3:102,519,208-102,519,294 | F | AACCCAAGCAGGCTGGAAAT |
| R | TTGCTTTACTCGGGGGATCG |
| eRNA #4 | Active | chr6:5,324,220-5,324,290 | F | GTGACTGGAAATCCAAAGTCAGT |
| R | GGGACCTTTGTGTTGCCTGA |
| eRNA #5 | Intermediate | chr1:156,878,345-156,878,408 | F | TGGAGCTGAAACCAAGCAAGA |
| R | TTCAAGCAGTTCCCTGGACA |
| eRNA #6 | Intermediate | chr13:96,368,386-96,368,485 | F | CAGTGTGGACAGTCTCTCTCTCCGTG |
| R | GCTTCAGCACAGACCATAGTAGCAGAAC |
| eRNA #7 | Intermediate | chr13:101,631,775-101,631,861 | F | CCATCCCTAGCCTAAAGAAGTAACATCAG |
| R | CTGCTTAGTGCTTCATAGCTTCATGAAATG |
| eRNA #8 | Active | chr10:119,922,560-119,922,639 | F | ACTATTGTCGGGAAGAGGCAC |
| R | GCCCTTGAAAGCAAATCCCAA |
| eRNA #9 | Active | chr14:54,685,147-54,685,243 | F | TTAGTGGGAATTCCGTGGCT |
| R | AGAGGTGTCTCCTGATTCCCT |
| eRNA #10 | Intermediate | chr15:71,989,184-71,989,263 | F | GCTGGGGATTACTCCTGTGAAC |
| R | TGAGCCACGGGGGTCAATA |

**Supplementary Table 4. List of eRNAs and oligonucleotides used for KDM1A cDNA complementation study.**
