# Supplementary material for: KDM1A maintains genome-wide homeostasis of transcriptional enhancers
Source: HighWire-hosted journal article supplement (doi:10.1101/gr.234559.118), 2021-01-07
Supplement: Supplementary_Table_S5.xlsx [file Supplementary_Table_S5.xlsx]

## Sheet: FDR<0.05, #gene<1000
Supplemental_Table_S5
Results of Gene ontology analyses on RNA-seq data in WT- and KDM1A-GT mESCs. Blue GO categories are related to response to extracellular stimuli.
Id	name	ConceptType	#Genes	Coeff	OddsRatio	P-Value	FDR	Enriched	SigGenes
GO:0070161	anchoring junction	GOCC	618	0.0177795	1.11683	2.2867e-08	1.83698e-06	enriched	11472, 11487, 11502, 11518, 11747, 11749, 11758, 11789, 11837, 11845, 12306, 12331, 12334, 12380, 12389, 12460, 12469, 12488, 12505, 12527, 12558, 12560, 12631, 13007, 13008, 13057, 13138, 13196, 13346, 13388, 13482, 13506, 13640, 13649, 13726, 13805, 13806, 13836, 13839, 14086, 14104, 14107, 14201, 14254, 14693, 15162, 15530, 16004, 16363, 16401, 16410, 16412, 16416, 16419, 16475, 16573, 16668, …
GO:0005912	adherens junction	GOCC	605	0.017756	1.11667	2.65285e-08	1.91801e-06	enriched	11472, 11487, 11502, 11518, 11747, 11749, 11758, 11789, 11837, 11845, 12306, 12331, 12334, 12380, 12389, 12460, 12469, 12488, 12505, 12527, 12558, 12560, 12631, 13007, 13008, 13057, 13138, 13196, 13346, 13388, 13482, 13506, 13640, 13649, 13726, 13805, 13806, 13836, 13839, 14086, 14104, 14107, 14201, 14254, 14693, 15162, 15530, 16004, 16363, 16401, 16410, 16412, 16416, 16419, 16475, 16573, 16668, …
GO:0005913	cell-cell adherens junction	GOCC	304	0.018292	1.12039	3.06318e-07	1.7036e-05	enriched	11518, 11758, 11789, 12306, 12380, 12460, 12469, 12488, 12558, 12560, 13138, 13196, 13346, 13506, 13649, 13726, 13806, 13836, 14086, 14104, 16412, 16573, 16668, 16763, 16774, 16796, 16898, 16952, 16978, 17131, 17254, 17886, 17988, 18000, 18221, 18477, 18643, 18746, 19175, 19274, 19387, 20411, 20742, 20743, 20779, 21346, 21816, 21872, 21894, 21917, 22323, 22330, 22384, 23983, 23999, 26394, 27008, …
901491	Antigens, Differentiation, T-L	MeSH	24	0.0321156	1.2209	9.72624e-09	1.92482e-05	enriched	14772, 14783, 18293, 20720, 26385, 79044, 232906
GO:0005911	cell-cell junction	GOCC	604	0.0159845	1.10444	5.98326e-07	3.08992e-05	enriched	11518, 11747, 11749, 11758, 11789, 11820, 11931, 12168, 12306, 12380, 12443, 12460, 12469, 12488, 12558, 12560, 12567, 12631, 12721, 12740, 12780, 13138, 13196, 13346, 13482, 13506, 13649, 13726, 13806, 13836, 13852, 14086, 14104, 14107, 14367, 14618, 14793, 16401, 16412, 16475, 16573, 16590, 16668, 16691, 16763, 16772, 16774, 16796, 16818, 16898, 16952, 16978, 17075, 17131, 17254, 17339, 17886, …
GO:0046626	regulation of insulin receptor signaling pathway	GOBP	55	0.0240553	1.16125	1.20123e-07	0.000108135	enriched	12567, 14783, 16002, 16367, 18708, 18751, 18753, 20779, 53322, 66898, 67389, 72674, 75747, 93759, 98496, 107351, 216233, 232339
GO:0030674	protein binding, bridging	GOMF	93	0.0214435	1.14255	5.8693e-07	0.00025316	enriched	11472, 12389, 12419, 12843, 13449, 14086, 14389, 14783, 16367, 16952, 19360, 20218, 20411, 21766, 53975, 56424, 66898, 67811, 68089, 94088, 99571, 107746, 108079, 109620, 216233, 228545, 232314, 327826, 338349
GO:0070064	proline-rich region binding	GOMF	16	0.0264934	1.17898	7.79464e-07	0.00025316	enriched	12443, 14470, 18643, 56070, 66898
GO:0060090	binding, bridging	GOMF	108	0.0206077	1.13663	1.04155e-06	0.000256047	enriched	11472, 12389, 12419, 12843, 13449, 13860, 14086, 14389, 14783, 16367, 16923, 16952, 18570, 19360, 20218, 20399, 20411, 21766, 53975, 56424, 66898, 67811, 68089, 70834, 75547, 94088, 99571, 107746, 108079, 109620, 216233, 226250, 228545, 232314, 327826, 338349
GO:1900076	regulation of cellular response to insulin stimulus	GOBP	69	0.0220994	1.14722	7.01091e-07	0.00029561	enriched	12567, 14783, 16002, 16367, 18053, 18708, 18751, 18753, 20779, 24014, 53322, 66898, 67389, 72674, 75747, 93759, 98496, 107351, 216233, 232339
GO:0009968	negative regulation of signal transduction	GOBP	937	0.0145936	1.09493	9.16859e-07	0.000357565	enriched	11535, 11614, 11789, 12006, 12028, 12034, 12050, 12111, 12122, 12142, 12159, 12211, 12261, 12373, 12389, 12421, 12443, 12505, 12558, 12633, 12759, 12824, 12952, 13123, 13131, 13138, 13198, 13389, 13429, 13601, 13653, 13669, 13709, 13836, 13867, 14048, 14106, 14114, 14119, 14154, 14368, 14460, 14462, 14562, 14632, 14634, 14733, 14734, 14739, 14772, 14775, 14783, 15194, 15201, 15258, 15259, 15368, …
GO:0008286	insulin receptor signaling pathway	GOBP	92	0.0208675	1.13847	1.20484e-06	0.000375369	enriched	12567, 14783, 16002, 16337, 16367, 18708, 18751, 18753, 20383, 20411, 20416, 20588, 20779, 27273, 53322, 54601, 66898, 67389, 72674, 75747, 83946, 93759, 98496, 107351, 216233, 232339, 320706, 384783
GO:0051764	actin crosslink formation	GOBP	12	0.0269248	1.18214	1.2082e-06	0.000375369	enriched	12808, 13860, 66898, 102866
GO:0098641	cadherin binding involved in cell-cell adhesion	GOMF	261	0.0175885	1.1155	2.24632e-06	0.000414165	enriched	11518, 11758, 12306, 12380, 12460, 12469, 12488, 13196, 13649, 13726, 13806, 13836, 14086, 14104, 16412, 16573, 16668, 16763, 16796, 16898, 16952, 16978, 17075, 17254, 17886, 17988, 18000, 18221, 18477, 18643, 18746, 19175, 19387, 20742, 20743, 20779, 21346, 21872, 21894, 21917, 22323, 22330, 22384, 23983, 23999, 26394, 27008, 27370, 29810, 29875, 30960, 52635, 54132, 54673, 55948, 56376, 56418, …
GO:0032870	cellular response to hormone stimulus	GOBP	418	0.0163216	1.10676	1.70784e-06	0.000420667	enriched	11472, 11610, 11614, 11747, 12034, 12159, 12192, 12193, 12389, 12566, 12567, 12877, 12952, 13123, 13640, 13839, 13864, 14081, 14106, 14228, 14245, 14460, 14536, 14600, 14783, 15370, 15375, 15378, 16002, 16323, 16324, 16337, 16367, 16452, 16476, 16590, 16798, 16847, 16952, 17274, 17970, 17977, 17978, 18033, 18053, 18128, 18479, 18519, 18600, 18626, 18673, 18708, 18751, 18753, 19060, 19387, 19712, …
GO:0098631	protein binding involved in cell adhesion	GOMF	272	0.0171657	1.11258	3.60237e-06	0.000442791	enriched	11518, 11758, 12306, 12380, 12460, 12469, 12488, 13196, 13649, 13726, 13806, 13836, 14086, 14104, 16412, 16573, 16668, 16763, 16796, 16898, 16952, 16978, 17075, 17254, 17886, 17988, 18000, 18221, 18477, 18643, 18746, 19175, 19387, 20742, 20743, 20779, 21346, 21872, 21894, 21917, 22323, 22330, 22384, 23983, 23999, 26394, 27008, 27370, 29810, 29875, 30960, 52635, 54132, 54673, 55948, 56376, 56418, …
GO:0098632	protein binding involved in cell-cell adhesion	GOMF	268	0.0173592	1.11391	2.85294e-06	0.000442791	enriched	11518, 11758, 12306, 12380, 12460, 12469, 12488, 13196, 13649, 13726, 13806, 13836, 14086, 14104, 16412, 16573, 16668, 16763, 16796, 16898, 16952, 16978, 17075, 17254, 17886, 17988, 18000, 18221, 18477, 18643, 18746, 19175, 19387, 20742, 20743, 20779, 21346, 21872, 21894, 21917, 22323, 22330, 22384, 23983, 23999, 26394, 27008, 27370, 29810, 29875, 30960, 52635, 54132, 54673, 55948, 56376, 56418, …
GO:0032869	cellular response to insulin stimulus	GOBP	148	0.0191788	1.12658	1.8975e-06	0.000448037	enriched	12192, 12566, 12567, 12877, 14245, 14783, 16002, 16324, 16337, 16367, 17274, 18053, 18479, 18519, 18708, 18751, 18753, 20383, 20393, 20411, 20416, 20588, 20683, 20779, 23797, 24014, 27273, 50933, 51788, 53322, 54601, 66898, 67389, 72674, 75747, 83946, 93759, 98496, 106572, 107351, 216233, 228775, 230796, 231207, 232339, 320706, 329877, 384783
905172	Immune Tolerance	MeSH	14	0.031318	1.21486	5.17091e-07	0.000511662	enriched	13638, 14783, 18293, 19249, 20957, 57321, 74106, 101358
GO:0030055	cell-substrate junction	GOCC	346	0.0153218	1.0999	1.93385e-05	0.000517842	enriched	11472, 11487, 11502, 11518, 11747, 11749, 11837, 11845, 12331, 12334, 12389, 12505, 12527, 12558, 12631, 13007, 13008, 13057, 13138, 13482, 13649, 13805, 13836, 14107, 14201, 14254, 14693, 15162, 15530, 16004, 16363, 16401, 16410, 16412, 16416, 16419, 16475, 16728, 16774, 16796, 16898, 16952, 16971, 17380, 17387, 17698, 17886, 17931, 18214, 18479, 18571, 18643, 18792, 19035, 19046, 19229, 20085, …
903816	Enzyme-Linked Immunosorbent As	MeSH	33	0.0277822	1.18846	8.29523e-07	0.000547209	enriched	11692, 13836, 14567, 14783, 16691, 17149, 20322, 57321, 60406, 60510, 69961, 73723, 232333
GO:2000251	positive regulation of actin cytoskeleton reorganization	GOBP	16	0.0253781	1.17083	2.5874e-06	0.000565683	enriched	15162, 23897, 66898, 74117
GO:0050839	cell adhesion molecule binding	GOMF	405	0.0157329	1.10271	6.25158e-06	0.000658648	enriched	11502, 11518, 11758, 12306, 12380, 12460, 12469, 12488, 12527, 12825, 13196, 13649, 13726, 13731, 13806, 13836, 14086, 14104, 14164, 14182, 14219, 14739, 16007, 16401, 16412, 16416, 16419, 16421, 16542, 16573, 16668, 16728, 16763, 16777, 16796, 16898, 16952, 16978, 17075, 17254, 17304, 17387, 17698, 17886, 17988, 18000, 18016, 18127, 18189, 18221, 18477, 18643, 18746, 19175, 19274, 19387, 20742, …
GO:0045296	cadherin binding	GOMF	281	0.0167151	1.10946	6.23797e-06	0.000658648	enriched	11518, 11758, 12306, 12380, 12460, 12469, 12488, 13196, 13649, 13726, 13806, 13836, 14086, 14104, 16412, 16573, 16668, 16763, 16796, 16898, 16952, 16978, 17075, 17254, 17886, 17988, 18000, 18127, 18221, 18477, 18643, 18746, 19175, 19274, 19387, 20742, 20743, 20779, 21346, 21872, 21894, 21917, 22323, 22330, 22384, 23983, 23999, 26394, 27008, 27370, 29810, 29875, 30960, 52635, 54132, 54366, 54673, …
GO:0032868	response to insulin	GOBP	177	0.0182179	1.11987	3.7373e-06	0.000735376	enriched	12192, 12566, 12567, 12877, 12952, 13653, 14245, 14783, 16002, 16324, 16337, 16367, 16418, 17274, 18053, 18387, 18479, 18519, 18708, 18751, 18753, 20383, 20393, 20411, 20416, 20588, 20683, 20779, 23797, 24014, 26457, 27273, 50880, 50933, 51788, 53322, 54601, 66898, 67389, 72674, 75747, 83946, 93759, 97212, 98496, 106572, 107351, 216233, 228775, 230796, 231207, 232339, 320706, 329877, 384783
GO:0007167	enzyme linked receptor protein signaling pathway	GOBP	743	0.0142979	1.09292	3.99746e-06	0.000761193	enriched	11482, 11502, 11641, 11820, 12153, 12159, 12168, 12367, 12389, 12560, 12567, 12579, 12825, 12827, 12842, 12843, 12977, 13388, 13449, 13637, 13638, 13640, 13643, 13649, 13650, 13653, 13805, 13836, 13838, 13839, 13846, 13867, 14066, 14106, 14119, 14164, 14171, 14172, 14178, 14182, 14219, 14225, 14232, 14254, 14257, 14302, 14388, 14462, 14538, 14562, 14600, 14708, 14733, 14734, 14783, 15114, 15162, …
GO:0009725	response to hormone	GOBP	531	0.0149786	1.09756	5.35549e-06	0.000854417	enriched	11472, 11502, 11610, 11614, 11747, 12034, 12038, 12159, 12192, 12193, 12389, 12443, 12566, 12567, 12583, 12877, 12952, 13123, 13640, 13653, 13839, 13864, 14081, 14106, 14228, 14245, 14460, 14536, 14600, 14783, 15370, 15375, 15378, 16002, 16323, 16324, 16337, 16367, 16418, 16452, 16476, 16590, 16798, 16847, 16952, 17274, 17387, 17436, 17970, 17977, 17978, 18033, 18053, 18125, 18128, 18387, 18479, …
GO:2000249	regulation of actin cytoskeleton reorganization	GOBP	27	0.0233112	1.15589	5.17672e-06	0.000854417	enriched	11857, 12488, 15162, 19229, 20349, 23897, 66898, 74117, 192662
GO:0071495	cellular response to endogenous stimulus	GOBP	888	0.0135016	1.08753	7.27242e-06	0.00112971	enriched	11472, 11482, 11502, 11610, 11614, 11622, 11747, 11803, 11820, 11991, 12034, 12153, 12159, 12168, 12192, 12193, 12334, 12373, 12389, 12394, 12505, 12527, 12566, 12567, 12579, 12633, 12721, 12824, 12825, 12827, 12832, 12842, 12843, 12877, 12952, 13123, 13435, 13640, 13649, 13653, 13805, 13839, 13864, 14081, 14106, 14119, 14164, 14171, 14172, 14178, 14182, 14219, 14228, 14232, 14245, 14460, 14462, …
GO:0007169	transmembrane receptor protein tyrosine kinase signaling pathway	GOBP	473	0.0150234	1.09786	8.10209e-06	0.00115995	enriched	11820, 12159, 12168, 12367, 12560, 12567, 12827, 12842, 12977, 13388, 13449, 13637, 13638, 13640, 13643, 13649, 13650, 13836, 13838, 13839, 13846, 13867, 14066, 14164, 14171, 14172, 14178, 14182, 14219, 14254, 14257, 14302, 14388, 14462, 14600, 14733, 14783, 15114, 15162, 16002, 16337, 16367, 16416, 16452, 16542, 16558, 16590, 16818, 16971, 17295, 17300, 17395, 17984, 18053, 18128, 18187, 18211, …
GO:1901701	cellular response to oxygen-containing compound	GOBP	701	0.0139522	1.09058	8.94661e-06	0.00120048	enriched	11303, 11472, 11502, 11518, 11610, 11622, 11747, 11757, 11792, 11799, 11803, 11820, 11991, 12142, 12159, 12176, 12192, 12193, 12290, 12334, 12389, 12460, 12511, 12566, 12567, 12571, 12633, 12825, 12832, 12842, 12843, 12877, 13078, 13435, 13619, 13640, 13649, 13653, 13839, 14245, 14469, 14528, 14600, 14678, 14745, 14775, 14783, 15370, 15394, 16002, 16210, 16323, 16324, 16337, 16367, 16439, 16452, …
GO:1901699	cellular response to nitrogen compound	GOBP	400	0.0153714	1.10024	9.42431e-06	0.00123626	enriched	11472, 11610, 11622, 11747, 11803, 11820, 11991, 12192, 12334, 12373, 12389, 12566, 12567, 12633, 12825, 12832, 12842, 12843, 12877, 13435, 13649, 13653, 14000, 14245, 14600, 14678, 14783, 15370, 16002, 16210, 16324, 16337, 16367, 16439, 16452, 17069, 17274, 17390, 18033, 18053, 18125, 18211, 18439, 18479, 18519, 18708, 18751, 18753, 19387, 20185, 20190, 20191, 20383, 20393, 20411, 20416, 20563, …
GO:0071375	cellular response to peptide hormone stimulus	GOBP	188	0.0173857	1.1141	1.00818e-05	0.00126623	enriched	11472, 11610, 11747, 12192, 12389, 12566, 12567, 12877, 14245, 14600, 14783, 15370, 16002, 16324, 16337, 16367, 16452, 17274, 18033, 18053, 18479, 18519, 18708, 18751, 18753, 19387, 20383, 20393, 20411, 20416, 20588, 20683, 20779, 23797, 24014, 27273, 50933, 51788, 53322, 54601, 66898, 67389, 67749, 72674, 75747, 83946, 93759, 98496, 106572, 107351, 109241, 216233, 228775, 230796, 231207, 232339,…
GO:0030949	positive regulation of vascular endothelial growth factor receptor signaling pathway	GOBP	13	0.0247997	1.16663	1.07725e-05	0.0013248	enriched	12159, 14172, 14254, 14783, 16542, 18751, 22339
GO:0005925	focal adhesion	GOCC	338	0.014586	1.09488	6.38837e-05	0.00139963	enriched	11472, 11487, 11502, 11518, 11747, 11749, 11837, 11845, 12331, 12334, 12389, 12505, 12527, 12558, 12631, 13007, 13008, 13057, 13138, 13482, 13649, 13805, 13836, 14107, 14201, 14254, 14693, 15162, 15530, 16004, 16363, 16401, 16410, 16412, 16416, 16419, 16475, 16728, 16796, 16898, 16952, 16971, 17380, 17387, 17698, 17886, 17931, 18214, 18479, 18571, 18643, 18792, 19035, 19046, 19229, 20085, 20410, …
GO:0031252	cell leading edge	GOCC	301	0.0148095	1.0964	7.20222e-05	0.00148777	enriched	11789, 11820, 11845, 11911, 11966, 12289, 12306, 12488, 12558, 12571, 12631, 12721, 12808, 13138, 13191, 13482, 13836, 13852, 13860, 14086, 14107, 14163, 14270, 14726, 15444, 16410, 16412, 16416, 16419, 16475, 16500, 16825, 16826, 17207, 17772, 17886, 18016, 18053, 18102, 18103, 18479, 18706, 19158, 19229, 19249, 19271, 19272, 19274, 19283, 19376, 19877, 20392, 20399, 20742, 20779, 20908, 20911, …
GO:0031532	actin cytoskeleton reorganization	GOBP	82	0.0194484	1.12847	1.42746e-05	0.00165222	enriched	11857, 12488, 13609, 13860, 14178, 14245, 14739, 15162, 16590, 16952, 17886, 18479, 19229, 20349, 20416, 23897, 56044, 57342, 66898, 72313, 74117, 170736, 192662, 218194, 226751, 227753, 231830, 320365
GO:1901653	cellular response to peptide	GOBP	194	0.0170206	1.11157	1.52279e-05	0.00169604	enriched	11472, 11610, 11747, 12192, 12389, 12566, 12567, 12877, 14245, 14600, 14783, 15370, 16002, 16324, 16337, 16367, 16452, 17274, 18033, 18053, 18479, 18519, 18708, 18751, 18753, 19387, 20383, 20393, 20411, 20416, 20588, 20683, 20779, 23797, 24014, 27273, 50933, 51788, 53322, 54601, 66898, 67389, 67749, 72674, 75747, 83946, 93759, 98496, 106572, 107351, 109241, 216233, 228775, 230796, 231207, 232339,…
GO:0048732	gland development	GOBP	398	0.0150479	1.09803	1.59105e-05	0.00173925	enriched	11614, 11622, 11692, 11789, 11821, 11845, 12028, 12034, 12159, 12190, 12234, 12389, 12394, 12421, 12426, 12443, 12505, 12576, 12583, 12606, 12633, 12724, 12808, 12977, 13123, 13138, 13649, 13836, 14104, 14178, 14182, 14228, 14462, 14632, 14634, 14775, 15205, 15368, 15375, 15400, 15405, 15417, 15438, 15902, 16002, 16004, 16337, 16367, 16452, 16468, 16476, 16772, 17069, 17128, 17158, 17295, 17300, …
GO:0005924	cell-substrate adherens junction	GOCC	343	0.014326	1.09311	8.8365e-05	0.00177466	enriched	11472, 11487, 11502, 11518, 11747, 11749, 11837, 11845, 12331, 12334, 12389, 12505, 12527, 12558, 12631, 13007, 13008, 13057, 13138, 13482, 13649, 13805, 13836, 14107, 14201, 14254, 14693, 15162, 15530, 16004, 16363, 16401, 16410, 16412, 16416, 16419, 16475, 16728, 16796, 16898, 16952, 16971, 17380, 17387, 17698, 17886, 17931, 18214, 18479, 18571, 18643, 18792, 19035, 19046, 19229, 20085, 20410, …
915237	Thymus Gland	MeSH	11	0.0309713	1.21225	3.8e-06	0.00188005	enriched	13638, 14772, 20957, 26385, 79044
907924	Multiple Sclerosis	MeSH	25	0.0275076	1.18643	5.34265e-06	0.00211462	enriched	14571, 14772, 16818, 18293, 19249, 54216, 209354, 233552
GO:0061180	mammary gland epithelium development	GOBP	71	0.0195659	1.1293	2.10984e-05	0.00218498	enriched	12028, 12034, 12190, 12234, 12443, 12977, 13836, 14462, 14775, 15902, 16452, 17702, 18208, 18612, 19206, 20563, 20779, 20852, 21386, 21420, 22337, 68750, 68911
GO:0010631	epithelial cell migration	GOBP	209	0.0164978	1.10797	2.43716e-05	0.00232041	enriched	11482, 11502, 11745, 11881, 12159, 12168, 13078, 13482, 13731, 13836, 13846, 14164, 14172, 14178, 14182, 14257, 14389, 14462, 14775, 15117, 15370, 16410, 16412, 16416, 16476, 16542, 16590, 17295, 17395, 17886, 18015, 18127, 18128, 18570, 18606, 18613, 18643, 18787, 19211, 19225, 19229, 19270, 19274, 19878, 20563, 20583, 20692, 20779, 20901, 21667, 21808, 21814, 21825, 22339, 22341, 22346, 23871, …
GO:0033598	mammary gland epithelial cell proliferation	GOBP	30	0.0218339	1.14533	2.43091e-05	0.00232041	enriched	12028, 12034, 12190, 12234, 12443, 13836, 14462, 14775, 15902, 18612, 20852, 21420, 68750, 68911
GO:0071417	cellular response to organonitrogen compound	GOBP	331	0.0152039	1.09909	2.64482e-05	0.00243806	enriched	11472, 11610, 11622, 11747, 11803, 11820, 11991, 12192, 12334, 12373, 12389, 12566, 12567, 12825, 12832, 12842, 12843, 12877, 13435, 13649, 13653, 14245, 14600, 14783, 15370, 16002, 16210, 16324, 16337, 16367, 16439, 16452, 17274, 17390, 18033, 18053, 18125, 18211, 18479, 18519, 18708, 18751, 18753, 19387, 20190, 20191, 20383, 20393, 20411, 20416, 20563, 20588, 20683, 20779, 21417, 23797, 24014, …
GO:0043434	response to peptide hormone	GOBP	236	0.0161133	1.10532	2.64133e-05	0.00243806	enriched	11472, 11610, 11747, 12192, 12389, 12566, 12567, 12583, 12877, 12952, 13653, 14245, 14600, 14783, 15370, 16002, 16324, 16337, 16367, 16418, 16452, 17274, 18033, 18053, 18125, 18387, 18479, 18519, 18708, 18751, 18753, 19387, 20383, 20393, 20411, 20416, 20588, 20683, 20779, 23797, 24014, 26457, 27273, 50880, 50933, 51788, 53322, 54601, 66445, 66898, 67389, 67749, 72674, 75747, 83946, 93759, 97212, …
GO:0090132	epithelium migration	GOBP	211	0.016406	1.10734	2.68463e-05	0.00243806	enriched	11482, 11502, 11745, 11881, 12159, 12168, 13078, 13482, 13731, 13836, 13846, 14164, 14172, 14178, 14182, 14257, 14389, 14462, 14775, 15117, 15370, 16410, 16412, 16416, 16476, 16542, 16590, 17295, 17395, 17886, 18015, 18127, 18128, 18570, 18606, 18613, 18643, 18787, 19211, 19225, 19229, 19270, 19274, 19878, 20563, 20583, 20692, 20779, 20901, 21667, 21808, 21814, 21825, 22339, 22341, 22346, 23871, …
GO:0014052	regulation of gamma-aminobutyric acid secretion	GOBP	10	0.0247958	1.1666	2.85823e-05	0.00251823	enriched	18439, 22044, 232333, 268860
GO:0090130	tissue migration	GOBP	213	0.0163127	1.10669	2.96466e-05	0.00257359	enriched	11482, 11502, 11745, 11881, 12159, 12168, 13078, 13482, 13731, 13836, 13846, 14164, 14172, 14178, 14182, 14257, 14389, 14462, 14775, 15117, 15370, 16410, 16412, 16416, 16476, 16542, 16590, 17295, 17395, 17886, 18015, 18127, 18128, 18570, 18606, 18613, 18643, 18787, 19211, 19225, 19229, 19270, 19274, 19878, 20563, 20583, 20692, 20779, 20901, 20997, 21667, 21808, 21814, 21825, 22339, 22341, 22346, …
GO:0040007	growth	GOBP	928	0.0124488	1.08044	3.3879e-05	0.00267061	enriched	11482, 11487, 11518, 11535, 11538, 11556, 11622, 11787, 11820, 12159, 12168, 12190, 12192, 12505, 12567, 12575, 12576, 12633, 12696, 12808, 12818, 12977, 12995, 13057, 13388, 13609, 13640, 13649, 13730, 13732, 13871, 14164, 14178, 14182, 14219, 14232, 14257, 14260, 14369, 14432, 14462, 14489, 14534, 14562, 14571, 14600, 14634, 14734, 14775, 15078, 15378, 15982, 16002, 16007, 16210, 16323, 16324, …
GO:2000252	negative regulation of feeding behavior	GOBP	12	0.0241403	1.16186	3.39312e-05	0.00267061	enriched	16847, 22044
GO:0030947	regulation of vascular endothelial growth factor receptor signaling pathway	GOBP	22	0.0223434	1.14896	3.86047e-05	0.00288694	enriched	12159, 14172, 14254, 14783, 16542, 18570, 18751, 22339, 22341, 226101
GO:0044420	extracellular matrix component	GOCC	124	0.0165514	1.10834	0.000174766	0.0032399	enriched	12306, 12394, 12814, 12816, 12824, 12825, 12827, 12831, 12832, 12837, 12842, 12843, 13006, 13138, 13640, 14114, 14119, 15530, 16412, 16763, 16772, 16774, 16775, 16777, 16949, 17181, 18208, 19283, 20692, 20737, 21808, 21858, 21923, 22339, 50530, 53867, 64075, 66548, 94216, 94352, 114249, 207596, 224697, 226519, 230316, 231470, 242022, 545370
911945	T-Lymphocytes	MeSH	96	0.022228	1.14813	1.1814e-05	0.00333999	enriched	13058, 14571, 14772, 14775, 14783, 16763, 16922, 18293, 20720, 20957, 26385, 27393, 56187, 57321, 60611, 66445, 68149, 68303, 68961, 74106, 74155, 75398, 79044, 94065, 94066, 101358, 107746, 212712, 224829, 320244, 329727
903411	Antigens, CD28	MeSH	14	0.029249	1.19934	1.10552e-05	0.00333999	enriched	14783, 18293, 20957, 56187, 60611, 101358
GO:0048589	developmental growth	GOBP	606	0.0131851	1.08539	5.30717e-05	0.00364281	enriched	11518, 11535, 11538, 11556, 11622, 11820, 12159, 12168, 12190, 12192, 12567, 12633, 12808, 12818, 12977, 13388, 13609, 13640, 13871, 14164, 14178, 14182, 14232, 14260, 14369, 14462, 14534, 14571, 14600, 14634, 14775, 15078, 15982, 16002, 16210, 16337, 16412, 16542, 16598, 16728, 16798, 16847, 16952, 17069, 17125, 17128, 17300, 17702, 17762, 17772, 17888, 17967, 17984, 18128, 18129, 18187, 18208, …
GO:0030879	mammary gland development	GOBP	124	0.0173617	1.11393	5.42934e-05	0.00368384	enriched	11821, 12028, 12034, 12159, 12190, 12234, 12389, 12443, 12583, 12977, 13836, 14104, 14462, 14634, 14775, 15405, 15417, 15438, 15902, 16367, 16452, 17702, 18102, 18208, 18505, 18612, 19206, 20563, 20779, 20852, 21386, 21420, 22337, 22339, 68750, 68911, 216233, 384783, 545156
GO:0070192	chromosome organization involved in meiotic cell cycle	GOBP	54	0.0195664	1.1293	5.90767e-05	0.00391831	enriched	12447, 12877, 13404, 14211, 19357, 19360, 20899, 20957, 20962, 21749, 66934, 67981, 68298, 70099, 74075, 75828, 78658, 83558, 98558, 104271, 110147, 211651, 239083
GO:0007628	adult walking behavior	GOBP	40	0.0202358	1.13401	7.23594e-05	0.00444935	enriched	13131, 13643, 13838, 15258, 17762, 21367, 22044, 50933, 64704, 76192, 240590, 320790
GO:1903792	negative regulation of anion transport	GOBP	24	0.0216224	1.14382	7.36509e-05	0.00446797	enriched	21825, 22044, 26385, 65106, 71345, 268860, 384783
GO:0043542	endothelial cell migration	GOBP	138	0.0167967	1.11003	7.98628e-05	0.00476192	enriched	11482, 11745, 12159, 12168, 13078, 13482, 13731, 13836, 13846, 14164, 14172, 14182, 14257, 14462, 14775, 15370, 16410, 16412, 16416, 16542, 17295, 17886, 18015, 18127, 18128, 18570, 18613, 19211, 19225, 19229, 19274, 19878, 20563, 20583, 20692, 21667, 21825, 22339, 22341, 22346, 23871, 23991, 27494, 56233, 67784, 70097, 73723, 94352, 230738, 243362
GO:0060603	mammary gland duct morphogenesis	GOBP	40	0.0201491	1.1334	8.1376e-05	0.00480362	enriched	12034, 12234, 12977, 13836, 17702, 18208, 18612, 19206, 20563, 20779, 21386, 21420, 22337
GO:0032452	histone demethylase activity	GOMF	21	0.0219583	1.14621	7.92345e-05	0.00486962	enriched	20592, 30841, 76804, 99982, 107817, 108829, 193796, 216850, 244694
GO:0005604	basement membrane	GOCC	96	0.0168756	1.11057	0.000286221	0.00492709	enriched	12306, 12394, 12824, 12827, 12831, 12837, 13006, 13138, 13640, 14114, 15530, 16412, 16763, 16772, 16774, 16775, 16777, 16949, 17181, 18208, 20692, 20737, 21808, 21858, 21923, 22339, 64075, 94216, 94352, 114249, 226519, 230316, 231470, 242022, 545370
GO:0090659	walking behavior	GOBP	41	0.0200337	1.13258	8.68507e-05	0.00507604	enriched	13131, 13643, 13838, 15258, 17762, 21367, 22044, 50933, 64704, 76192, 240590, 320790
GO:0008630	intrinsic apoptotic signaling pathway in response to DNA damage	GOBP	95	0.0177186	1.11641	9.04963e-05	0.00518641	enriched	12018, 12028, 12050, 12122, 12190, 12505, 12575, 12759, 13836, 15257, 15258, 15368, 16149, 17193, 17688, 17869, 18708, 18950, 20482, 20583, 20656, 22038, 27050, 51800, 55948, 64704, 66824, 68048, 68428, 69076, 74747, 74996, 75736, 93759, 98558, 99982, 234371, 235323, 328572
5604811	Signal attenuation	Reactome	12	0.033771	1.23352	5.96124e-06	0.00526974	enriched	14783, 16337, 16367, 20416, 20662, 216148, 384783
914505	Isoantigens	MeSH	10	0.0301388	1.20599	2.23212e-05	0.00552172	enriched	14783, 20739, 107392
GO:1901652	response to peptide	GOBP	259	0.014956	1.0974	9.90922e-05	0.00562444	enriched	11472, 11610, 11747, 12192, 12389, 12566, 12567, 12583, 12877, 12952, 13653, 14245, 14600, 14783, 15370, 16002, 16324, 16337, 16367, 16418, 16452, 17274, 18033, 18053, 18125, 18128, 18387, 18479, 18519, 18708, 18751, 18753, 19387, 20383, 20393, 20411, 20416, 20588, 20683, 20779, 23797, 24014, 26457, 27273, 50880, 50933, 51788, 53322, 54601, 66445, 66898, 67389, 67749, 72674, 75747, 83946, 93759, …
GO:0072358	cardiovascular system development	GOBP	603	0.0127465	1.08244	0.000104849	0.00562656	enriched	11421, 11482, 11518, 11535, 11622, 11745, 11947, 12018, 12028, 12142, 12159, 12168, 12192, 12226, 12306, 12389, 12394, 12558, 12591, 12633, 12662, 12765, 12825, 12827, 12831, 12837, 12842, 12843, 13058, 13078, 13198, 13388, 13393, 13601, 13609, 13653, 13731, 13805, 13836, 13846, 14048, 14066, 14106, 14164, 14172, 14182, 14219, 14254, 14257, 14367, 14472, 14634, 14725, 14726, 14734, 14775, 15117, …
GO:0001944	vasculature development	GOBP	592	0.0128098	1.08286	0.00010208	0.00562656	enriched	11421, 11482, 11518, 11535, 11622, 11745, 11947, 12018, 12028, 12142, 12159, 12168, 12192, 12226, 12306, 12389, 12394, 12558, 12591, 12633, 12662, 12765, 12825, 12827, 12831, 12837, 12842, 12843, 13058, 13078, 13198, 13388, 13393, 13601, 13609, 13653, 13731, 13805, 13836, 13846, 14048, 14066, 14106, 14164, 14172, 14182, 14219, 14254, 14257, 14367, 14472, 14634, 14725, 14726, 14734, 14775, 15117, …
GO:0007009	plasma membrane organization	GOBP	261	0.0149006	1.09702	0.000104182	0.00562656	enriched	11472, 11773, 11845, 11931, 12297, 12306, 12389, 12558, 12759, 12831, 13196, 13483, 13731, 13836, 13852, 16412, 16500, 16573, 16668, 17274, 17988, 18439, 18708, 18753, 19153, 19206, 19211, 19376, 19877, 19878, 20194, 20411, 20739, 20742, 20908, 20910, 20955, 21808, 22038, 23969, 23991, 26903, 26941, 27008, 50918, 52028, 52588, 54214, 54673, 56089, 56224, 56460, 57437, 66352, 66898, 67300, 67378, …
GO:0043009	chordate embryonic development	GOBP	654	0.0125229	1.08093	0.000108819	0.00578701	enriched	11482, 11487, 11518, 11535, 11931, 12006, 12142, 12159, 12190, 12192, 12211, 12334, 12394, 12590, 12591, 12606, 12614, 12631, 12808, 12814, 12824, 12842, 13135, 13388, 13389, 13445, 13649, 13716, 13806, 13836, 13871, 13875, 14042, 14048, 14182, 14232, 14365, 14367, 14368, 14388, 14460, 14462, 14472, 14531, 14534, 14562, 14634, 14791, 15194, 15205, 15375, 15394, 15400, 15405, 15417, 15425, 15438, …
GO:0030334	regulation of cell migration	GOBP	648	0.0125152	1.08088	0.000113817	0.00599878	enriched	11421, 11482, 11487, 11502, 11745, 11789, 11792, 11857, 11881, 11980, 12159, 12168, 12261, 12721, 12765, 12825, 12842, 12877, 12977, 13078, 13138, 13601, 13609, 13649, 13653, 13731, 13805, 13836, 14062, 14066, 14164, 14172, 14178, 14182, 14254, 14257, 14270, 14388, 14389, 14462, 14538, 14726, 14745, 14747, 15117, 16007, 16149, 16177, 16195, 16337, 16367, 16401, 16410, 16412, 16416, 16452, 16475, …
GO:0051270	regulation of cellular component movement	GOBP	741	0.0121783	1.07862	0.000116335	0.00607722	enriched	11421, 11482, 11487, 11502, 11745, 11747, 11789, 11792, 11857, 11881, 11980, 12159, 12168, 12261, 12373, 12389, 12576, 12721, 12765, 12825, 12842, 12877, 12977, 13078, 13138, 13411, 13506, 13601, 13609, 13649, 13653, 13731, 13805, 13836, 14062, 14066, 14114, 14164, 14172, 14178, 14182, 14254, 14257, 14270, 14388, 14389, 14462, 14538, 14726, 14745, 14747, 15114, 15117, 16007, 16149, 16177, 16195, …
GO:0060443	mammary gland morphogenesis	GOBP	57	0.018909	1.1247	0.000118317	0.00611944	enriched	12028, 12034, 12159, 12234, 12389, 12977, 13836, 14634, 17702, 18208, 18505, 18612, 19206, 20563, 20779, 20852, 21386, 21420, 22337
GO:0070076	histone lysine demethylation	GOBP	22	0.021492	1.14289	0.000121325	0.00617397	enriched	20592, 30841, 76804, 99982, 108829, 193796, 216850, 244694
GO:2000145	regulation of cell motility	GOBP	681	0.0122839	1.07933	0.000134337	0.00634617	enriched	11421, 11482, 11487, 11502, 11745, 11747, 11789, 11792, 11857, 11881, 11980, 12159, 12168, 12261, 12721, 12765, 12825, 12842, 12877, 12977, 13078, 13138, 13601, 13609, 13649, 13653, 13731, 13805, 13836, 14062, 14066, 14114, 14164, 14172, 14178, 14182, 14254, 14257, 14270, 14388, 14389, 14462, 14538, 14726, 14745, 14747, 15117, 16007, 16149, 16177, 16195, 16337, 16367, 16401, 16410, 16412, 16416, …
GO:0009792	embryo development ending in birth or egg hatching	GOBP	660	0.0123448	1.07974	0.000137263	0.00634617	enriched	11482, 11487, 11518, 11535, 11931, 12006, 12142, 12159, 12190, 12192, 12211, 12334, 12394, 12590, 12591, 12606, 12614, 12631, 12808, 12814, 12824, 12842, 13135, 13388, 13389, 13445, 13649, 13716, 13806, 13836, 13871, 13875, 14042, 14048, 14182, 14232, 14365, 14367, 14368, 14388, 14460, 14462, 14472, 14531, 14534, 14562, 14634, 14791, 15194, 15205, 15375, 15394, 15400, 15405, 15417, 15425, 15438, …
GO:1901698	response to nitrogen compound	GOBP	593	0.012626	1.08163	0.000133256	0.00634617	enriched	11472, 11610, 11622, 11747, 11803, 11820, 11991, 12038, 12192, 12334, 12373, 12389, 12443, 12566, 12567, 12583, 12631, 12633, 12825, 12832, 12842, 12843, 12877, 12952, 13435, 13649, 13653, 14000, 14225, 14245, 14600, 14678, 14680, 14783, 14863, 15368, 15370, 16002, 16210, 16324, 16337, 16367, 16410, 16418, 16439, 16452, 16476, 17069, 17254, 17274, 17390, 17869, 17967, 17993, 18033, 18053, 18125, …
GO:0022612	gland morphogenesis	GOBP	142	0.0163841	1.10719	0.000127488	0.00634617	enriched	12028, 12034, 12159, 12234, 12389, 12505, 12633, 12977, 13123, 13138, 13649, 13836, 14178, 14182, 14632, 14634, 15375, 16772, 17295, 17345, 17390, 17698, 17702, 18128, 18129, 18208, 18505, 18508, 18590, 18612, 18792, 19206, 20181, 20563, 20583, 20779, 20852, 21386, 21420, 21923, 22337, 26554, 26941, 56711, 67784, 72043, 77411, 238386, 240725, 327826
GO:0045995	regulation of embryonic development	GOBP	112	0.0169684	1.11121	0.00013761	0.00634617	enriched	12159, 12590, 12591, 12614, 12831, 12832, 13138, 13388, 14182, 14365, 14369, 14460, 14462, 15205, 15378, 16337, 16772, 16774, 16775, 18128, 18505, 21815, 22026, 22113, 22158, 23939, 23966, 27206, 27494, 50918, 56274, 70300, 71175, 76707, 99683, 99982, 102693, 208177, 216021, 240725
GO:0045132	meiotic chromosome segregation	GOBP	69	0.0183185	1.12058	0.000130466	0.00634617	enriched	12190, 12447, 12877, 13404, 14211, 19357, 20899, 20957, 20962, 21749, 21973, 21974, 30939, 54204, 66713, 66934, 67981, 70099, 74075, 74117, 75828, 83558, 98558, 104271, 110147, 193838, 211651, 239083
GO:0005979	regulation of glycogen biosynthetic process	GOBP	26	0.0209894	1.13933	0.000128491	0.00634617	enriched	14583, 14783, 16002, 16337, 16367, 19045, 19046, 20411, 384783
GO:0010962	regulation of glucan biosynthetic process	GOBP	26	0.0209894	1.13933	0.000128491	0.00634617	enriched	14583, 14783, 16002, 16337, 16367, 19045, 19046, 20411, 384783
GO:0014051	gamma-aminobutyric acid secretion	GOBP	16	0.0223298	1.14886	0.000129188	0.00634617	enriched	18015, 18439, 18479, 22044, 232333, 268860
GO:0002031	G-protein coupled receptor internalization	GOBP	14	0.0226606	1.15123	0.000137064	0.00634617	enriched	11535, 13429, 14772
GO:0060429	epithelium development	GOBP	985	0.011399	1.07341	0.000139866	0.00640024	enriched	11482, 11535, 11614, 11622, 11789, 11847, 12006, 12018, 12028, 12034, 12142, 12159, 12168, 12190, 12192, 12226, 12234, 12367, 12389, 12394, 12443, 12505, 12558, 12560, 12571, 12576, 12590, 12591, 12614, 12631, 12765, 12808, 12824, 12831, 12931, 12977, 13003, 13123, 13138, 13167, 13388, 13389, 13393, 13649, 13805, 13836, 13838, 13852, 13871, 14048, 14106, 14164, 14178, 14182, 14232, 14254, 14260, …
GO:0072359	circulatory system development	GOBP	898	0.0115993	1.07475	0.000141673	0.00643304	enriched	11421, 11472, 11482, 11492, 11518, 11535, 11622, 11745, 11764, 11909, 11947, 12006, 12018, 12028, 12142, 12159, 12168, 12192, 12226, 12306, 12367, 12389, 12394, 12421, 12558, 12591, 12633, 12662, 12765, 12814, 12818, 12824, 12825, 12827, 12831, 12837, 12842, 12843, 13003, 13058, 13078, 13198, 13388, 13393, 13411, 13601, 13609, 13653, 13731, 13805, 13836, 13846, 13867, 14048, 14066, 14106, 14164, …
GO:0010569	regulation of double-strand break repair via homologous recombination	GOBP	22	0.0213438	1.14184	0.000148108	0.00667391	enriched	19362, 56420, 57321, 99982, 104271, 170472, 232314, 237211, 269400, 668225
GO:0051129	negative regulation of cellular component organization	GOBP	560	0.0126864	1.08203	0.000150036	0.00670957	enriched	11421, 11482, 11518, 11773, 11789, 11807, 11813, 11845, 11856, 12159, 12176, 12306, 12389, 12449, 12633, 12721, 12759, 12995, 13000, 13131, 13196, 13482, 13609, 13640, 13838, 13860, 14114, 14228, 14489, 14567, 14745, 14775, 14897, 15078, 15205, 15901, 15982, 16210, 16412, 16468, 16765, 16852, 16854, 16971, 17245, 17246, 17318, 17387, 17754, 17758, 17772, 18053, 18208, 18413, 18613, 18643, 18753, …
GO:0048729	tissue morphogenesis	GOBP	596	0.0125115	1.08086	0.000154865	0.00672447	enriched	11482, 11535, 11622, 12018, 12028, 12034, 12159, 12168, 12234, 12394, 12505, 12614, 12631, 12765, 12808, 12814, 12825, 12831, 12977, 13123, 13138, 13388, 13609, 13649, 13805, 13836, 13838, 14048, 14106, 14164, 14178, 14182, 14225, 14254, 14260, 14365, 14367, 14368, 14462, 14472, 14531, 14534, 14537, 14634, 14734, 15194, 15205, 15209, 15375, 16007, 16323, 16475, 16542, 16667, 16772, 17069, 17125, …
GO:0001667	ameboidal-type cell migration	GOBP	316	0.0141259	1.09176	0.000153732	0.00672447	enriched	11482, 11502, 11745, 11857, 11881, 12159, 12168, 12261, 12331, 12631, 13078, 13482, 13731, 13836, 13846, 14164, 14172, 14178, 14182, 14257, 14270, 14389, 14462, 14472, 14775, 15117, 15370, 16401, 16410, 16412, 16416, 16421, 16476, 16542, 16590, 17295, 17395, 17886, 18015, 18127, 18128, 18187, 18214, 18481, 18505, 18508, 18570, 18606, 18613, 18643, 18787, 19211, 19225, 19229, 19270, 19274, 19878, …
GO:0016577	histone demethylation	GOBP	24	0.0210704	1.1399	0.000154926	0.00672447	enriched	20592, 30841, 76804, 99982, 107817, 108829, 193796, 216850, 244694
GO:0034644	cellular response to UV	GOBP	59	0.0185204	1.12198	0.000176279	0.00737998	enriched	12018, 12028, 12530, 12575, 12914, 16210, 17380, 18708, 18971, 19272, 20174, 20877, 22591, 52033, 67738, 68142, 69076, 72584, 74996, 80750, 93759, 99982, 109685, 213990, 234371, 235323, 328572
GO:0006482	protein demethylation	GOBP	26	0.020758	1.13769	0.000175377	0.00737998	enriched	20592, 30841, 72590, 76804, 99982, 107817, 108829, 193796, 216850, 244694
GO:0008214	protein dealkylation	GOBP	26	0.020758	1.13769	0.000175377	0.00737998	enriched	20592, 30841, 72590, 76804, 99982, 107817, 108829, 193796, 216850, 244694
GO:0030838	positive regulation of actin filament polymerization	GOBP	78	0.017758	1.11668	0.000177813	0.00739175	enriched	11845, 12721, 14260, 18643, 19229, 19720, 22323, 54631, 56699, 66713, 66824, 66898, 68089, 68524, 74117, 76932, 101314, 104445, 105855, 170643, 215280, 227753, 330319, 544963
GO:0022603	regulation of anatomical structure morphogenesis	GOBP	879	0.0114815	1.07396	0.000181795	0.00745863	enriched	11482, 11502, 11518, 11535, 11538, 11745, 11789, 12028, 12034, 12159, 12168, 12176, 12226, 12261, 12394, 12558, 12590, 12591, 12614, 12631, 12633, 12721, 12765, 12810, 12827, 12831, 12832, 12977, 13058, 13078, 13131, 13138, 13388, 13601, 13631, 13640, 13731, 13805, 13836, 13838, 13846, 13860, 14048, 14066, 14114, 14163, 14164, 14178, 14182, 14254, 14257, 14365, 14368, 14369, 14453, 14462, 14531, …
903288	Antigens, CD	MeSH	100	0.0212865	1.14144	3.42093e-05	0.00752225	enriched	13058, 14472, 14772, 14775, 14783, 14807, 14923, 18293, 20720, 20739, 20957, 26385, 53623, 56709, 57321, 60611, 66445, 67489, 68312, 70021, 79044, 101358, 107746, 209318, 231086, 232333, 232906
GO:0001701	in utero embryonic development	GOBP	393	0.0133844	1.08674	0.000198219	0.00806956	enriched	11482, 11487, 11518, 11535, 11931, 12142, 12190, 12192, 12211, 12334, 12394, 12591, 12606, 13135, 13388, 13389, 13445, 13649, 13716, 13806, 13871, 13875, 14182, 14367, 14388, 14460, 14462, 14531, 14534, 14562, 14634, 14791, 15205, 15469, 16007, 16401, 16410, 16412, 16598, 16691, 16798, 17069, 17128, 17133, 17134, 17158, 17300, 17684, 17886, 17888, 17977, 18127, 18128, 18129, 18999, 19143, 19206, …
914444	Immunity	MeSH	26	0.0258976	1.17462	4.2093e-05	0.0083302	enriched	14783, 16763, 21672, 68966, 78455, 103784, 224829, 242785, 270906
GO:0048010	vascular endothelial growth factor receptor signaling pathway	GOBP	37	0.0196662	1.13	0.000207719	0.00839838	enriched	12159, 12168, 14172, 14254, 14257, 14783, 16542, 17300, 18570, 18751, 19229, 22339, 22341, 226101, 240725
GO:0043433	negative regulation of sequence-specific DNA binding transcription factor activity	GOBP	130	0.0162513	1.10627	0.00021195	0.00845365	enriched	11614, 11746, 12034, 12611, 13078, 13198, 14106, 14368, 14747, 15368, 15378, 15901, 15902, 17131, 17702, 17846, 19122, 19206, 19820, 19821, 20747, 20821, 21672, 24058, 24105, 26565, 66824, 67025, 67490, 68729, 70312, 73914, 80280, 93759, 99311, 99982, 107392, 108960, 112405, 211770, 217410, 230594, 230738, 241035, 244349, 327987
GO:0005978	glycogen biosynthetic process	GOBP	37	0.0196187	1.12967	0.000221326	0.00870991	enriched	14583, 14783, 14936, 16002, 16337, 16367, 18682, 19045, 19046, 20411, 53412, 68961, 217166, 384783
GO:0009250	glucan biosynthetic process	GOBP	37	0.0196187	1.12967	0.000221326	0.00870991	enriched	14583, 14783, 14936, 16002, 16337, 16367, 18682, 19045, 19046, 20411, 53412, 68961, 217166, 384783
GO:0045143	homologous chromosome segregation	GOBP	48	0.018868	1.12441	0.000234298	0.00909909	enriched	12190, 12447, 12877, 13404, 20899, 20957, 20962, 21749, 30939, 67981, 74075, 83558, 98558, 104271, 110147, 211651, 239083
GO:0042771	intrinsic apoptotic signaling pathway in response to DNA damage by p53 class mediator	GOBP	34	0.0197701	1.13073	0.000246077	0.00943242	enriched	12190, 12505, 12575, 15257, 15258, 16149, 66824, 68048, 68428, 69076, 74747, 75736, 93759, 99982, 235323, 328572
GO:0033599	regulation of mammary gland epithelial cell proliferation	GOBP	18	0.0214896	1.14288	0.000256608	0.00977264	enriched	12028, 12034, 12190, 12443, 14462, 14775, 18612, 68750, 68911
GO:0051093	negative regulation of developmental process	GOBP	797	0.0114495	1.07375	0.000265431	0.00994501	enriched	11307, 11482, 11556, 11614, 11789, 11820, 11845, 11857, 12006, 12034, 12159, 12176, 12190, 12192, 12193, 12389, 12443, 12505, 12560, 12571, 12576, 12579, 12633, 12825, 12827, 12831, 12832, 13131, 13196, 13198, 13388, 13389, 13601, 13640, 13836, 13838, 14114, 14182, 14270, 14357, 14365, 14369, 14460, 14462, 14562, 14567, 14634, 14745, 14912, 15205, 15375, 15405, 15469, 15901, 15902, 15982, 16149, …
GO:0040012	regulation of locomotion	GOBP	720	0.0116759	1.07526	0.00026979	0.00994501	enriched	11421, 11482, 11487, 11502, 11745, 11747, 11789, 11792, 11857, 11881, 11980, 12159, 12168, 12261, 12721, 12765, 12825, 12842, 12877, 12977, 13078, 13138, 13601, 13609, 13649, 13653, 13731, 13805, 13836, 14062, 14066, 14114, 14164, 14172, 14178, 14182, 14254, 14257, 14270, 14388, 14389, 14462, 14538, 14726, 14745, 14747, 15117, 16007, 16149, 16177, 16195, 16337, 16367, 16401, 16410, 16412, 16416, …
GO:0006897	endocytosis	GOBP	448	0.0128311	1.08301	0.000271243	0.00994501	enriched	11303, 11518, 11535, 11736, 11745, 11773, 11803, 11813, 11820, 11891, 11947, 11981, 12306, 12331, 12389, 12488, 12527, 12721, 12728, 12765, 13057, 13388, 13429, 13631, 14269, 14600, 14725, 14734, 14772, 15162, 16401, 16410, 16412, 16835, 16847, 16854, 16952, 16971, 16975, 17076, 17289, 17304, 17533, 17886, 17921, 18102, 18439, 18613, 18704, 18706, 18717, 18752, 18779, 18787, 19211, 19261, 19376, …
GO:0032273	positive regulation of protein polymerization	GOBP	96	0.0168842	1.11063	0.000271095	0.00994501	enriched	11789, 11845, 12389, 12576, 12721, 14260, 17762, 18643, 19229, 19720, 22323, 27050, 54631, 56699, 56742, 66713, 66824, 66898, 68089, 68524, 74117, 75991, 76932, 101314, 104445, 105855, 170643, 215280, 227753, 330319, 544963
GO:0070873	regulation of glycogen metabolic process	GOBP	31	0.01996	1.13207	0.00026744	0.00994501	enriched	14583, 14783, 16002, 16337, 16367, 19045, 19046, 20411, 22113, 384783
GO:0005158	insulin receptor binding	GOMF	31	0.0201561	1.13345	0.000213041	0.00996879	enriched	13449, 14783, 16002, 16367, 18708, 20411, 20416, 20779, 67804, 83946, 107971, 327826, 384783
GO:0032451	demethylase activity	GOMF	27	0.0205206	1.13602	0.000216272	0.00996879	enriched	20592, 30841, 76804, 99982, 107817, 108829, 193796, 216850, 244694, 268420
GO:0015812	gamma-aminobutyric acid transport	GOBP	19	0.0212838	1.14142	0.000276305	0.0100681	enriched	18015, 18439, 18479, 22044, 232333, 268860
GO:0032885	regulation of polysaccharide biosynthetic process	GOBP	34	0.0196753	1.13006	0.000279144	0.0101091	enriched	14583, 14783, 15117, 16002, 16337, 16367, 18033, 19045, 19046, 20411, 67300, 384783
905910	Lymphocyte Activation	MeSH	82	0.0215649	1.14341	5.69348e-05	0.0102431	enriched	13058, 14571, 14772, 14783, 18293, 20720, 20957, 26385, 52530, 57321, 60611, 66445, 67009, 67749, 70021, 74106, 79044, 101358, 105675, 107746, 212712
GO:0001568	blood vessel development	GOBP	570	0.0121721	1.07858	0.000296148	0.0105311	enriched	11421, 11482, 11518, 11535, 11622, 11745, 11947, 12018, 12028, 12142, 12159, 12168, 12192, 12226, 12306, 12389, 12394, 12558, 12591, 12633, 12662, 12765, 12825, 12827, 12831, 12837, 12842, 12843, 13058, 13078, 13198, 13388, 13393, 13601, 13609, 13653, 13731, 13805, 13836, 13846, 14048, 14066, 14106, 14164, 14172, 14182, 14219, 14254, 14257, 14367, 14472, 14634, 14725, 14734, 14775, 15117, 15205, …
901833	Antigens, CD3	MeSH	28	0.0252802	1.17012	6.6533e-05	0.0109724	enriched	14772, 14775, 20957, 26385, 66194, 67009, 79044, 212712
GO:0051253	negative regulation of RNA metabolic process	GOBP	982	0.0108608	1.06983	0.000314405	0.0109819	enriched	11568, 11569, 11614, 11622, 11799, 11906, 11909, 12014, 12034, 12142, 12159, 12227, 12234, 12261, 12389, 12394, 12417, 12419, 12443, 12447, 12566, 12571, 12576, 12591, 12606, 12914, 12952, 13017, 13198, 13435, 13653, 13864, 13875, 14105, 14106, 14182, 14245, 14302, 14460, 14462, 14536, 14634, 14912, 14957, 15191, 15201, 15205, 15209, 15257, 15258, 15259, 15375, 15384, 15438, 15901, 15902, 16210, …
GO:0048521	negative regulation of behavior	GOBP	21	0.0209144	1.1388	0.000312228	0.0109819	enriched	16847, 22044, 105171
GO:0050769	positive regulation of neurogenesis	GOBP	438	0.0127624	1.08254	0.000323539	0.0111687	enriched	11421, 11538, 11881, 12159, 12168, 12633, 12808, 12877, 12977, 13131, 13176, 13389, 13631, 13640, 13838, 14182, 14365, 14634, 14745, 14912, 15114, 15205, 15375, 15902, 16177, 16195, 16210, 16412, 16542, 16590, 16728, 16975, 17158, 17165, 17295, 17762, 17869, 17977, 18010, 18012, 18014, 18053, 18102, 18103, 18128, 18208, 18211, 18481, 18508, 18519, 18606, 18755, 19205, 19229, 19283, 19744, 20238, …
GO:0032970	regulation of actin filament-based process	GOBP	303	0.0136952	1.08884	0.000327191	0.0112291	enriched	11472, 11518, 11845, 11856, 11857, 12373, 12389, 12488, 12614, 12631, 12632, 12721, 13506, 13609, 13640, 13839, 13860, 14086, 14219, 14260, 14489, 14745, 15162, 15901, 16416, 16798, 16971, 17886, 17996, 18016, 18479, 18481, 18613, 18643, 18708, 18753, 19229, 19720, 19877, 19878, 20191, 20194, 20349, 20410, 20563, 20739, 20742, 21808, 21916, 22323, 22351, 23897, 23999, 50490, 50918, 54631, 56431, …
GO:0002088	lens development in camera-type eye	GOBP	59	0.0180487	1.1187	0.000330927	0.0112917	enriched	12159, 12576, 13836, 14462, 15257, 15258, 17339, 17684, 18016, 18508, 20482, 20664, 20666, 20674, 21916, 22352, 24136, 29815, 56371, 57810, 68911, 100121, 110380, 195727, 327826, 544696
GO:1902679	negative regulation of RNA biosynthetic process	GOBP	940	0.010876	1.06993	0.000354073	0.0119434	enriched	11568, 11569, 11614, 11622, 11799, 11906, 11909, 12014, 12034, 12142, 12159, 12227, 12234, 12261, 12389, 12394, 12417, 12419, 12443, 12447, 12566, 12571, 12576, 12591, 12606, 12914, 12952, 13017, 13198, 13435, 13653, 13864, 13875, 14106, 14182, 14245, 14302, 14460, 14462, 14536, 14634, 14912, 14957, 15191, 15201, 15205, 15209, 15257, 15258, 15259, 15375, 15384, 15438, 15901, 15902, 16210, 16468, …
GO:1903507	negative regulation of nucleic acid-templated transcription	GOBP	926	0.0108804	1.06996	0.000369231	0.012314	enriched	11568, 11569, 11614, 11622, 11799, 11906, 11909, 12014, 12034, 12142, 12159, 12227, 12234, 12261, 12389, 12394, 12417, 12419, 12443, 12447, 12566, 12571, 12576, 12591, 12606, 12914, 12952, 13017, 13198, 13435, 13653, 13864, 13875, 14106, 14182, 14245, 14302, 14460, 14462, 14536, 14634, 14912, 14957, 15191, 15201, 15205, 15209, 15257, 15258, 15259, 15375, 15384, 15438, 15901, 15902, 16210, 16468, …
GO:0045892	negative regulation of transcription, DNA-templated	GOBP	924	0.0108887	1.07001	0.000367387	0.012314	enriched	11568, 11569, 11614, 11622, 11799, 11906, 11909, 12014, 12034, 12142, 12159, 12227, 12234, 12261, 12389, 12394, 12417, 12419, 12443, 12447, 12566, 12571, 12576, 12591, 12606, 12914, 12952, 13017, 13198, 13435, 13653, 13864, 13875, 14106, 14182, 14245, 14302, 14460, 14462, 14536, 14634, 14912, 14957, 15191, 15201, 15205, 15209, 15257, 15258, 15259, 15375, 15384, 15438, 15901, 15902, 16210, 16468, …
GO:0009913	epidermal cell differentiation	GOBP	143	0.0155627	1.10155	0.000380084	0.0126047	enriched	12159, 12192, 12367, 12560, 13388, 13836, 13871, 14182, 14562, 14632, 15205, 16667, 16798, 16952, 17133, 17134, 17702, 17921, 18103, 18109, 18128, 18508, 18755, 19143, 19206, 19207, 19225, 19877, 19878, 21420, 21808, 21816, 22295, 22337, 26914, 26941, 50523, 55948, 56338, 71529, 71913, 72333, 74155, 99683, 107586, 109620, 218756, 224796, 235505, 286940, 433759
GO:0010829	negative regulation of glucose transport	GOBP	21	0.0207472	1.13762	0.000389442	0.0127715	enriched	11421, 14783, 17869, 18751, 98496, 100647
GO:0044092	negative regulation of molecular function	GOBP	786	0.0111962	1.07206	0.000400414	0.0130588	enriched	11421, 11472, 11538, 11605, 11614, 11746, 11757, 11789, 11799, 11807, 11820, 11847, 12028, 12034, 12111, 12159, 12211, 12306, 12367, 12373, 12380, 12389, 12505, 12575, 12576, 12611, 12633, 12995, 13078, 13197, 13198, 13601, 13716, 14106, 14154, 14225, 14368, 14460, 14734, 14747, 14775, 15194, 15205, 15259, 15368, 15370, 15378, 15444, 15901, 15902, 16337, 16401, 16452, 16475, 16476, 16798, 16847, …
GO:0008344	adult locomotory behavior	GOBP	99	0.0164806	1.10785	0.0004151	0.0134634	enriched	11820, 12444, 13131, 13429, 13643, 13838, 13860, 15258, 15438, 15902, 17762, 20238, 21367, 21916, 22044, 22295, 50933, 56747, 64704, 76192, 80912, 98660, 101490, 216856, 240590, 320790, 545156
GO:0070988	demethylation	GOBP	42	0.0187904	1.12387	0.000419587	0.0135346	enriched	11792, 14462, 20592, 21849, 30841, 72590, 76804, 99982, 107817, 108829, 193796, 216850, 244694, 268420
GO:0035295	tube development	GOBP	613	0.0117069	1.07547	0.000445289	0.0138842	enriched	11421, 11482, 11535, 11622, 11847, 11886, 12018, 12028, 12034, 12142, 12159, 12168, 12192, 12234, 12426, 12505, 12591, 12606, 12614, 12631, 12765, 12808, 12825, 12931, 12977, 13003, 13138, 13388, 13649, 13805, 13836, 13838, 13852, 14048, 14106, 14164, 14172, 14178, 14182, 14219, 14232, 14254, 14257, 14260, 14365, 14368, 14460, 14462, 14472, 14534, 14632, 14634, 14726, 14734, 15205, 15375, 15394, …
GO:0009411	response to UV	GOBP	115	0.0160465	1.10486	0.000433177	0.0138842	enriched	12018, 12028, 12190, 12367, 12443, 12530, 12575, 12696, 12914, 13649, 13871, 14775, 15312, 15574, 16210, 17380, 17688, 18708, 18971, 19272, 20174, 20318, 20822, 20877, 22591, 52033, 63958, 67738, 68142, 69076, 69723, 72584, 74996, 80750, 93759, 99982, 109685, 213990, 230484, 234371, 235323, 328572
GO:0007129	synapsis	GOBP	38	0.0190309	1.12555	0.000437489	0.0138842	enriched	12447, 12877, 13404, 20899, 20957, 20962, 67981, 74075, 83558, 98558, 104271, 110147, 211651, 239083
GO:0002029	desensitization of G-protein coupled receptor protein signaling pathway	GOBP	20	0.0207859	1.13789	0.000442027	0.0138842	enriched	11535, 13429, 14772, 26385
GO:0022401	negative adaptation of signaling pathway	GOBP	20	0.0207859	1.13789	0.000442027	0.0138842	enriched	11535, 13429, 14772, 26385
GO:0046325	negative regulation of glucose import	GOBP	18	0.0210703	1.1399	0.00044689	0.0138842	enriched	11421, 14783, 17869, 98496, 100647
GO:1903046	meiotic cell cycle process	GOBP	166	0.0150337	1.09793	0.000453098	0.0140033	enriched	12190, 12447, 12877, 13006, 13206, 13404, 14211, 15574, 17345, 17686, 17688, 17702, 17886, 18413, 19045, 19357, 19360, 20112, 20899, 20957, 20962, 21749, 21973, 21974, 23997, 28114, 30939, 50796, 54204, 56371, 57434, 66713, 66934, 67981, 68298, 70099, 71241, 72634, 74075, 74117, 75388, 75828, 78658, 83456, 83558, 83560, 94244, 98558, 104271, 107995, 110147, 140557, 193838, 211651, 230861, 235559,…
GO:0097284	hepatocyte apoptotic process	GOBP	15	0.0215618	1.14339	0.000457662	0.0140707	enriched	11845, 12122, 12633, 16668, 16691, 19645, 56274, 56428, 227753
GO:0005694	chromosome	GOCC	811	0.0105811	1.06797	0.000884521	0.0142113	enriched	11789, 11799, 11909, 12190, 12334, 12417, 12419, 12444, 12566, 12567, 12591, 12914, 12995, 13006, 13191, 13404, 13435, 13619, 13716, 14106, 14156, 14211, 14462, 14534, 14957, 14958, 15078, 15201, 15205, 15288, 15312, 15574, 15902, 16319, 16476, 16825, 16970, 17128, 17191, 17193, 17216, 17218, 17258, 17300, 17345, 17684, 17686, 17688, 17869, 17931, 17977, 18000, 18019, 18140, 18393, 18477, 18508, …
GO:0030027	lamellipodium	GOCC	135	0.0151131	1.09847	0.00087007	0.0142113	enriched	11789, 11820, 12558, 12631, 12721, 13138, 13482, 13852, 14086, 14107, 14163, 14270, 14726, 16410, 16416, 16475, 17207, 18016, 18103, 18706, 19229, 19249, 19274, 19283, 19877, 20908, 20911, 20955, 22323, 23897, 23991, 23999, 26903, 27494, 57342, 67784, 73723, 74018, 74117, 100169, 101314, 104418, 106952, 108686, 170736, 213556, 217124, 224014, 226251, 227753, 319565, 544963
GO:0032403	protein complex binding	GOMF	768	0.0114426	1.0737	0.000349629	0.0143251	enriched	11472, 11482, 11502, 11518, 11749, 11789, 11792, 11931, 12028, 12039, 12040, 12367, 12443, 12447, 12488, 12527, 12558, 12566, 12567, 12575, 12576, 12606, 12631, 12632, 12633, 12721, 12810, 12825, 12874, 13006, 13138, 13429, 13449, 13482, 13649, 13731, 14062, 14086, 14114, 14164, 14182, 14219, 14225, 14675, 14678, 14680, 14687, 14693, 14696, 14725, 14733, 14739, 14783, 15078, 15205, 15312, 15510, …
GO:2000779	regulation of double-strand break repair	GOBP	35	0.019181	1.1266	0.000482049	0.014678	enriched	14897, 18294, 19362, 51869, 56420, 57321, 70790, 99982, 104271, 108937, 170472, 232314, 237211, 244694, 269400, 668225
GO:0002577	regulation of antigen processing and presentation	GOBP	16	0.0213294	1.14174	0.000489528	0.0146836	enriched	16149, 21825, 66824, 77706, 213233
GO:0030832	regulation of actin filament length	GOBP	145	0.0153104	1.09982	0.000505463	0.0146983	enriched	11472, 11518, 11845, 12631, 12632, 12721, 13860, 14260, 14489, 16798, 17996, 18481, 18613, 18643, 18753, 19229, 19720, 20563, 20739, 20742, 21916, 22323, 22351, 23897, 23999, 50918, 54631, 56431, 56699, 65970, 66713, 66824, 66898, 68089, 68524, 73723, 73910, 74117, 76932, 101314, 102774, 104445, 105855, 107351, 110380, 170643, 213556, 215280, 225288, 227753, 231637, 232906, 330319, 544963
GO:0051569	regulation of histone H3-K4 methylation	GOBP	25	0.0200717	1.13285	0.000502241	0.0146983	enriched	14462, 17128, 22083, 26914, 66317, 68911, 71458, 99982, 110147, 214162, 664799
GO:0051568	histone H3-K4 methylation	GOBP	42	0.0186419	1.12283	0.000509286	0.0147368	enriched	14462, 14957, 17128, 22083, 26914, 66317, 68911, 71458, 74322, 77305, 99982, 110147, 140858, 192195, 214162, 238247, 381022, 664799
GO:0032881	regulation of polysaccharide metabolic process	GOBP	39	0.0188356	1.12418	0.000514588	0.0148176	enriched	14583, 14783, 15117, 16002, 16337, 16367, 18033, 19045, 19046, 20411, 22113, 67300, 384783
GO:0035162	embryonic hemopoiesis	GOBP	26	0.01994	1.13192	0.00051806	0.0148452	enriched	11622, 12394, 14460, 14462, 16542, 16590, 16825, 16923, 22339, 56274, 99982, 214162, 217351, 244349
GO:0035239	tube morphogenesis	GOBP	388	0.0127175	1.08224	0.000524296	0.0149513	enriched	11482, 11535, 11622, 12018, 12028, 12034, 12159, 12234, 12505, 12614, 12631, 12765, 12808, 12977, 13138, 13388, 13649, 13805, 13836, 13838, 13852, 14048, 14106, 14164, 14254, 14260, 14365, 14368, 14462, 14472, 14534, 14634, 14726, 14734, 15205, 15375, 15394, 15902, 16542, 16772, 17128, 17295, 17387, 17684, 17702, 17869, 18021, 18109, 18128, 18129, 18208, 18479, 18505, 18612, 18643, 19045, 19058, …
GO:0070307	lens fiber cell development	GOBP	12	0.0220752	1.14704	0.00053314	0.015058	enriched	13836, 21916, 22352, 327826
GO:0030029	actin filament-based process	GOBP	579	0.0117077	1.07547	0.000538426	0.0151349	enriched	11472, 11518, 11641, 11787, 11845, 11856, 11857, 12331, 12372, 12373, 12389, 12488, 12614, 12631, 12632, 12633, 12721, 12808, 13007, 13506, 13609, 13640, 13731, 13839, 13860, 14086, 14107, 14163, 14178, 14201, 14219, 14245, 14260, 14270, 14489, 14739, 14745, 15162, 15901, 16412, 16416, 16419, 16511, 16590, 16691, 16798, 16897, 16952, 16971, 17258, 17886, 17888, 17921, 17996, 18015, 18016, 18479, …
GO:0033692	cellular polysaccharide biosynthetic process	GOBP	48	0.0182132	1.11984	0.000554694	0.0154331	enriched	14042, 14583, 14783, 14936, 15117, 16002, 16337, 16367, 18682, 19045, 19046, 20411, 23908, 53412, 53625, 68961, 217166, 384783
GO:1902165	regulation of intrinsic apoptotic signaling pathway in response to DNA damage by p53 class mediator	GOBP	10	0.022521	1.15023	0.000587826	0.0161392	enriched	12505, 16149, 68428, 69076, 75736, 93759, 99982
GO:0097190	apoptotic signaling pathway	GOBP	513	0.0118919	1.0767	0.000626143	0.0168006	enriched	11749, 11911, 12018, 12028, 12050, 12122, 12159, 12176, 12190, 12211, 12366, 12367, 12389, 12421, 12505, 12575, 12633, 12759, 12824, 13078, 13198, 13836, 13867, 14048, 14182, 14460, 14775, 15194, 15201, 15254, 15257, 15258, 15368, 16149, 16323, 16324, 16410, 16452, 16476, 16668, 16691, 16818, 16854, 17193, 17347, 17395, 17428, 17688, 17762, 17869, 18015, 18053, 18413, 18439, 18708, 18753, 18787, …
GO:0010243	response to organonitrogen compound	GOBP	507	0.0118863	1.07667	0.000656033	0.0171352	enriched	11472, 11610, 11622, 11747, 11803, 11820, 11991, 12038, 12192, 12334, 12373, 12389, 12443, 12566, 12567, 12583, 12631, 12825, 12832, 12842, 12843, 12877, 12952, 13435, 13649, 13653, 14225, 14245, 14600, 14680, 14783, 15368, 15370, 16002, 16210, 16324, 16337, 16367, 16418, 16439, 16452, 16476, 17274, 17390, 17869, 17967, 17993, 18033, 18053, 18125, 18128, 18211, 18387, 18439, 18479, 18519, 18626, …
GO:0070848	response to growth factor	GOBP	474	0.0120542	1.07779	0.000653937	0.0171352	enriched	11482, 11502, 11906, 12153, 12159, 12168, 12192, 12193, 12367, 12389, 12394, 12505, 12579, 12633, 12721, 12824, 12825, 12827, 12843, 12914, 13388, 13649, 13653, 13726, 13805, 13836, 14106, 14119, 14164, 14171, 14172, 14178, 14182, 14219, 14232, 14254, 14257, 14462, 14538, 14562, 14733, 14734, 14783, 15114, 15117, 15205, 15258, 15370, 15446, 15901, 16007, 16337, 16416, 16419, 16476, 16542, 16558, …
GO:0032535	regulation of cellular component size	GOBP	327	0.0129912	1.08408	0.000650811	0.0171352	enriched	11472, 11518, 11538, 11622, 11845, 12168, 12421, 12567, 12631, 12632, 12721, 12729, 13640, 13860, 14260, 14489, 15982, 16728, 16798, 17339, 17762, 17996, 18208, 18439, 18481, 18613, 18632, 18643, 18753, 19211, 19229, 19720, 20349, 20354, 20563, 20739, 20742, 21367, 21916, 22323, 22339, 22351, 22415, 22422, 22439, 23897, 23999, 26941, 29869, 50918, 54214, 54631, 54712, 56177, 56431, 56699, 58234, …
GO:1901342	regulation of vasculature development	GOBP	223	0.0139872	1.09082	0.000645952	0.0171352	enriched	11482, 11518, 11535, 11745, 12159, 12226, 12394, 12633, 12765, 12827, 13058, 13078, 13388, 13601, 13653, 13731, 13805, 13836, 13846, 14066, 14164, 14254, 15258, 15368, 15901, 16416, 16542, 16590, 16854, 17300, 17395, 18015, 18053, 18127, 18128, 18570, 18606, 18751, 18787, 19225, 19229, 19274, 19877, 19878, 20349, 20692, 21413, 21825, 22339, 22341, 22375, 22431, 23871, 23939, 23991, 27494, 54601, …
GO:0032956	regulation of actin cytoskeleton organization	GOBP	268	0.0134921	1.08746	0.000660267	0.0171699	enriched	11472, 11518, 11845, 11856, 11857, 12488, 12614, 12631, 12632, 12721, 13609, 13640, 13839, 13860, 14086, 14219, 14260, 14489, 14745, 15162, 15901, 16416, 16798, 16971, 17996, 18016, 18479, 18481, 18613, 18643, 18708, 18753, 19229, 19720, 19877, 19878, 20194, 20349, 20410, 20563, 20739, 20742, 21808, 21916, 22323, 22351, 23897, 23999, 50490, 50918, 54631, 56431, 56699, 58234, 65970, 66713, 66824, …
GO:0010677	negative regulation of cellular carbohydrate metabolic process	GOBP	33	0.019095	1.126	0.000663444	0.0171768	enriched	14583, 14783, 16847, 67389, 74747, 320706
GO:0002089	lens morphogenesis in camera-type eye	GOBP	21	0.0203303	1.13467	0.000670308	0.0172787	enriched	12159, 13836, 15257, 15258, 17684, 20664, 20666, 20674, 29815, 100121, 110380
GO:0048009	insulin-like growth factor receptor signaling pathway	GOBP	34	0.0189694	1.12512	0.000701895	0.0179363	enriched	12560, 14600, 14783, 16367, 18708, 20238, 57330, 83946
GO:0000122	negative regulation of transcription from RNA polymerase II promoter	GOBP	659	0.0111888	1.07201	0.000718331	0.0180907	enriched	11568, 11569, 11614, 11622, 11906, 11909, 12014, 12142, 12159, 12227, 12261, 12389, 12443, 12447, 12566, 12571, 12591, 12606, 12914, 12952, 13017, 13198, 13435, 13653, 13864, 13875, 14106, 14182, 14245, 14302, 14460, 14462, 14536, 14634, 14912, 14957, 15191, 15205, 15257, 15258, 15259, 15375, 15384, 15438, 15901, 15902, 16210, 16468, 16475, 16476, 16597, 16969, 16975, 17128, 17131, 17191, 17246, …
GO:0060562	epithelial tube morphogenesis	GOBP	353	0.0127227	1.08228	0.000717816	0.0180907	enriched	11482, 11535, 11622, 12018, 12028, 12034, 12159, 12234, 12505, 12614, 12631, 12765, 12808, 12977, 13138, 13388, 13805, 13836, 13838, 14048, 14106, 14164, 14254, 14260, 14365, 14368, 14462, 14472, 14534, 14634, 14734, 15205, 15375, 16542, 16772, 17128, 17295, 17387, 17684, 17702, 17869, 18021, 18109, 18128, 18129, 18208, 18479, 18505, 18612, 18643, 19045, 19058, 19143, 19206, 19878, 20191, 20349, …
GO:0005996	monosaccharide metabolic process	GOBP	193	0.0142739	1.09276	0.000728634	0.0181482	enriched	11911, 12952, 14534, 14571, 14583, 14783, 15277, 15378, 16002, 16337, 16367, 16847, 17158, 17159, 17869, 17978, 18519, 18597, 18648, 18706, 18708, 18746, 19045, 19046, 20322, 20411, 20779, 21991, 22113, 26384, 27273, 28146, 29858, 53893, 66646, 67389, 68263, 69976, 70974, 71665, 71755, 72674, 74551, 75805, 76969, 93759, 110119, 110208, 140858, 217166, 228026, 230796, 235339, 320706, 384783
GO:0048514	blood vessel morphogenesis	GOBP	481	0.011927	1.07694	0.000739338	0.0181846	enriched	11421, 11482, 11518, 11535, 11622, 11745, 11947, 12018, 12028, 12142, 12159, 12192, 12226, 12306, 12389, 12394, 12558, 12765, 12825, 12827, 12837, 13058, 13078, 13388, 13601, 13609, 13731, 13805, 13836, 13846, 14048, 14066, 14106, 14164, 14172, 14182, 14219, 14254, 14257, 14367, 14472, 14775, 15117, 15205, 15258, 15368, 15370, 15394, 15446, 15530, 15901, 16007, 16410, 16412, 16416, 16476, 16542, …
GO:0048568	embryonic organ development	GOBP	433	0.0121888	1.07869	0.0007377	0.0181846	enriched	11535, 11622, 12142, 12159, 12192, 12211, 12394, 12591, 12606, 12614, 12808, 12814, 12824, 13388, 13649, 13799, 13805, 13836, 13875, 14048, 14106, 14182, 14365, 14367, 14368, 14388, 14460, 14462, 14472, 14531, 14562, 14632, 14634, 15205, 15209, 15257, 15258, 15394, 15400, 15438, 15530, 15902, 16007, 16206, 16348, 16401, 16410, 16542, 16590, 16691, 16825, 16923, 17300, 17387, 17684, 17869, 17921, …
GO:0023058	adaptation of signaling pathway	GOBP	22	0.0201312	1.13327	0.000733697	0.0181846	enriched	11535, 13429, 14772, 26385
GO:0030833	regulation of actin filament polymerization	GOBP	124	0.0153945	1.1004	0.000778476	0.019034	enriched	11518, 11845, 12721, 13860, 14260, 14489, 16798, 18481, 18613, 18643, 18753, 19229, 19720, 20563, 20739, 20742, 21916, 22323, 22351, 23897, 23999, 50918, 54631, 56699, 66713, 66824, 66898, 68089, 68524, 73910, 74117, 76932, 101314, 102774, 104445, 105855, 107351, 170643, 215280, 225288, 227753, 330319, 544963
GO:0072111	cell proliferation involved in kidney development	GOBP	21	0.0202116	1.13384	0.000780502	0.019034	enriched	12159, 12633, 13653, 14462, 14734, 16416, 17869, 19206, 22431, 83557, 216805
GO:0010720	positive regulation of cell development	GOBP	504	0.0117258	1.07559	0.000830392	0.0198582	enriched	11421, 11538, 11881, 12159, 12168, 12261, 12394, 12633, 12808, 12877, 12977, 13131, 13176, 13389, 13631, 13640, 13838, 14182, 14365, 14634, 14739, 14745, 14912, 15114, 15117, 15205, 15375, 15902, 16177, 16195, 16210, 16412, 16416, 16542, 16590, 16728, 16975, 17158, 17165, 17295, 17762, 17869, 17977, 18010, 18012, 18014, 18053, 18102, 18103, 18128, 18208, 18211, 18481, 18508, 18519, 18606, 18755, …
GO:0008064	regulation of actin polymerization or depolymerization	GOBP	144	0.0149458	1.09733	0.00083093	0.0198582	enriched	11472, 11518, 11845, 12631, 12632, 12721, 13860, 14260, 14489, 16798, 18481, 18613, 18643, 18753, 19229, 19720, 20563, 20739, 20742, 21916, 22323, 22351, 23897, 23999, 50918, 54631, 56431, 56699, 65970, 66713, 66824, 66898, 68089, 68524, 73723, 73910, 74117, 76932, 101314, 102774, 104445, 105855, 107351, 110380, 170643, 213556, 215280, 225288, 227753, 231637, 232906, 330319, 544963
GO:0050673	epithelial cell proliferation	GOBP	344	0.0126654	1.08189	0.000844155	0.0200122	enriched	11482, 11534, 11789, 11799, 11909, 11946, 12028, 12034, 12050, 12159, 12168, 12190, 12192, 12234, 12389, 12443, 12444, 12560, 12571, 12576, 12579, 12633, 12837, 13057, 13123, 13601, 13649, 13836, 14048, 14066, 14164, 14178, 14257, 14369, 14462, 14632, 14645, 14734, 14775, 15117, 15205, 15312, 15370, 15901, 15902, 16416, 16476, 16542, 16590, 17345, 17869, 18015, 18102, 18103, 18128, 18129, 18508, …
GO:0045912	negative regulation of carbohydrate metabolic process	GOBP	36	0.0186695	1.12302	0.000842886	0.0200122	enriched	14583, 14783, 16847, 67300, 67389, 74747, 320706
GO:0007010	cytoskeleton organization	GOBP	973	0.0101758	1.06528	0.000856474	0.0201425	enriched	11472, 11518, 11641, 11789, 11799, 11845, 11856, 11857, 12190, 12331, 12334, 12338, 12372, 12373, 12389, 12449, 12488, 12566, 12576, 12614, 12631, 12632, 12633, 12721, 12808, 13007, 13138, 13197, 13346, 13424, 13609, 13640, 13731, 13839, 13860, 14048, 14086, 14107, 14163, 14178, 14201, 14219, 14228, 14245, 14260, 14270, 14489, 14739, 14745, 15162, 15194, 15901, 16412, 16416, 16419, 16475, 16590, …
GO:0046627	negative regulation of insulin receptor signaling pathway	GOBP	35	0.0187359	1.12349	0.000854386	0.0201425	enriched	14783, 16367, 18751, 18753, 53322, 98496, 107351, 216233, 232339
GO:0098813	nuclear chromosome segregation	GOBP	197	0.0140881	1.0915	0.000864141	0.0202422	enriched	11789, 12006, 12034, 12190, 12447, 12877, 12995, 13000, 13006, 13404, 14211, 14579, 16798, 19357, 19645, 20877, 20899, 20957, 20962, 21749, 21951, 21973, 21974, 26554, 26914, 30939, 52563, 54204, 56150, 56742, 59014, 66156, 66713, 66934, 67981, 68142, 68298, 68612, 70099, 71175, 72124, 74075, 74117, 74549, 75608, 75828, 77805, 78658, 79456, 83558, 83560, 98558, 103268, 104271, 107995, 108000, 108…
GO:0097193	intrinsic apoptotic signaling pathway	GOBP	246	0.0134902	1.08745	0.000884743	0.0206428	enriched	11911, 12018, 12028, 12050, 12122, 12176, 12190, 12367, 12389, 12505, 12575, 12759, 13078, 13198, 13836, 14775, 15201, 15254, 15257, 15258, 15368, 16149, 16452, 16818, 17193, 17395, 17688, 17762, 17869, 18708, 18950, 20482, 20583, 20656, 20747, 20779, 22038, 22361, 23939, 26427, 26926, 26941, 26943, 27050, 51800, 53610, 55948, 56449, 64209, 64704, 65106, 66073, 66437, 66593, 66824, 67184, 68020, …
GO:0008652	cellular amino acid biosynthetic process	GOBP	45	0.0180172	1.11848	0.000891928	0.0207285	enriched	12036, 14645, 14718, 14719, 17769, 20425, 27053, 56454, 66194, 67870, 67873, 69051, 76615, 100678, 104923, 107272, 107869, 108037, 108156, 227231, 268860
909065	nef Gene Products, Human Immun	MeSH	22	0.0256434	1.17276	0.000136268	0.0207442	enriched	14783, 57321, 78801, 79044, 327762, 330355
913707	Antigens, Differentiation	MeSH	33	0.0240579	1.16127	0.000147561	0.0208588	enriched	14472, 14783, 18293, 52665, 57295, 57750, 68149, 78455, 109284, 216157, 217109
GO:0090287	regulation of cellular response to growth factor stimulus	GOBP	214	0.0138283	1.08974	0.000913311	0.0210264	enriched	11482, 12159, 12168, 12389, 12579, 12633, 13388, 13805, 14119, 14164, 14172, 14182, 14232, 14254, 14462, 14562, 14733, 14734, 14783, 15205, 15258, 16007, 16542, 17128, 17131, 17684, 17702, 17826, 18053, 18128, 18129, 18550, 18570, 18751, 20482, 20563, 20666, 20901, 21413, 21417, 21667, 21814, 21825, 22339, 22341, 24064, 58250, 70300, 72043, 80288, 93759, 94093, 102141, 105083, 114249, 170676, 213…
GO:0030216	keratinocyte differentiation	GOBP	86	0.0162466	1.10624	0.000915432	0.0210264	enriched	12192, 12367, 12560, 13836, 16667, 16798, 16952, 17702, 18103, 18128, 18508, 18755, 19143, 19225, 19877, 19878, 21420, 21808, 21816, 22337, 26914, 50523, 55948, 56338, 71529, 71913, 72333, 74155, 107586, 109620, 235505, 286940
GO:0019318	hexose metabolic process	GOBP	185	0.0141887	1.09218	0.000938529	0.0212235	enriched	11911, 12952, 14534, 14571, 14583, 14783, 15277, 15378, 16002, 16337, 16367, 16847, 17158, 17159, 17869, 17978, 18519, 18597, 18648, 18706, 18708, 18746, 19045, 19046, 20322, 20411, 20779, 21991, 22113, 26384, 27273, 28146, 29858, 67389, 68263, 69976, 70974, 71665, 72674, 74551, 75805, 76969, 93759, 110119, 140858, 217166, 228026, 230796, 235339, 320706, 384783
GO:0007126	meiotic nuclear division	GOBP	156	0.0146375	1.09523	0.000939586	0.0212235	enriched	12190, 12447, 12877, 13006, 13206, 13404, 14211, 17345, 17686, 17688, 17702, 18413, 19045, 19357, 19360, 20112, 20899, 20957, 20962, 21749, 21973, 21974, 23997, 30939, 50796, 54204, 56371, 57434, 66713, 66934, 67981, 70099, 71241, 72634, 74075, 74117, 75388, 75828, 83456, 83558, 83560, 94244, 98558, 104271, 107995, 110147, 140557, 193838, 211651, 230861, 235559, 239083, 259279
GO:0070306	lens fiber cell differentiation	GOBP	25	0.0195859	1.12944	0.000937113	0.0212235	enriched	12576, 13836, 18016, 20482, 21916, 22352, 24136, 56371, 100121, 327826
GO:0050768	negative regulation of neurogenesis	GOBP	262	0.0132524	1.08585	0.000974118	0.0217998	enriched	11820, 11845, 12159, 12389, 12579, 12825, 13131, 13196, 13388, 13389, 13838, 14270, 14357, 14567, 14634, 14745, 14912, 15205, 15901, 15902, 15982, 16412, 16852, 16971, 17246, 18015, 18053, 18109, 18128, 18208, 18508, 18536, 18858, 19158, 19211, 19270, 19283, 19712, 20349, 20354, 20563, 20620, 20660, 20666, 20674, 20745, 21367, 22068, 22352, 22415, 22422, 23991, 26921, 28000, 29869, 50849, 50913, …
GO:0060252	positive regulation of glial cell proliferation	GOBP	14	0.0211686	1.1406	0.000974954	0.0217998	enriched	17869, 18755, 20238, 22352, 56711, 67490
GO:0007059	chromosome segregation	GOBP	257	0.0132984	1.08616	0.000978872	0.0218048	enriched	11789, 11799, 12006, 12034, 12190, 12447, 12877, 12995, 13000, 13006, 13404, 13871, 14211, 14579, 16319, 16798, 19357, 19645, 20842, 20877, 20899, 20957, 20962, 21749, 21951, 21973, 21974, 22284, 24086, 26371, 26554, 26900, 26914, 27050, 30939, 52563, 54204, 56150, 56742, 59014, 66140, 66156, 66617, 66713, 66934, 67981, 68142, 68298, 68612, 69736, 69912, 70099, 71175, 72124, 74075, 74117, 74549, …
GO:0002009	morphogenesis of an epithelium	GOBP	505	0.011592	1.0747	0.000985798	0.021825	enriched	11482, 11535, 11622, 12018, 12028, 12034, 12159, 12234, 12394, 12505, 12614, 12631, 12765, 12808, 12831, 12977, 13123, 13138, 13388, 13649, 13805, 13836, 13838, 14048, 14106, 14164, 14178, 14182, 14254, 14260, 14365, 14367, 14368, 14462, 14472, 14531, 14534, 14634, 14734, 15194, 15205, 15209, 15375, 16007, 16475, 16542, 16667, 16772, 17128, 17295, 17387, 17390, 17684, 17698, 17702, 17869, 18021, …
GO:0002040	sprouting angiogenesis	GOBP	64	0.0169807	1.1113	0.000989312	0.021825	enriched	12159, 13388, 13836, 13846, 14164, 14254, 14257, 15370, 16412, 16542, 18128, 19225, 19229, 20349, 20563, 21667, 21825, 22339, 23991, 56233, 57342, 94352, 107817, 243362
GO:0060215	primitive hemopoiesis	GOBP	10	0.0221056	1.14726	0.000999376	0.0218562	enriched	14460, 16825, 22339, 56274, 99982
GO:0019369	arachidonic acid metabolic process	GOBP	17	0.020596	1.13655	0.00101004	0.0219201	enriched	13078, 13106, 18783, 19225, 67452
901992	CD4-Positive T-Lymphocytes	MeSH	55	0.0221032	1.14724	0.000168478	0.0222279	enriched	13058, 14783, 16728, 16763, 18293, 19249, 20720, 20957, 27393, 52530, 60611, 66194, 68379, 74155, 79044, 101358, 105675, 107746, 108829, 212712, 224829, 320244
GO:0033043	regulation of organelle organization	GOBP	884	0.0102477	1.06576	0.0010358	0.0222338	enriched	11472, 11518, 11789, 11845, 11856, 11857, 12006, 12018, 12028, 12034, 12122, 12159, 12176, 12261, 12306, 12334, 12338, 12389, 12449, 12462, 12468, 12469, 12488, 12576, 12614, 12631, 12632, 12721, 12995, 13000, 13196, 13609, 13640, 13839, 13860, 14020, 14086, 14219, 14228, 14260, 14367, 14489, 14534, 14745, 14775, 15078, 15114, 15162, 15194, 15205, 15277, 15901, 16002, 16337, 16416, 16542, 16573, …
GO:0001525	angiogenesis	GOBP	394	0.0121672	1.07855	0.00103573	0.0222338	enriched	11421, 11482, 11518, 11535, 11622, 11745, 11947, 12018, 12028, 12159, 12226, 12306, 12389, 12394, 12765, 12827, 12837, 13058, 13078, 13388, 13601, 13609, 13731, 13805, 13836, 13846, 14066, 14164, 14172, 14182, 14219, 14254, 14257, 14367, 14472, 14775, 15258, 15368, 15370, 15530, 15901, 16007, 16410, 16412, 16416, 16476, 16542, 16790, 16847, 16854, 17300, 17304, 17390, 17395, 17886, 18015, 18021, …
GO:0071478	cellular response to radiation	GOBP	121	0.0152351	1.09931	0.00103561	0.0222338	enriched	12018, 12028, 12444, 12530, 12575, 12914, 13197, 13653, 14462, 15574, 16210, 17380, 18708, 18971, 19272, 19362, 20174, 20583, 20877, 22591, 22596, 24086, 52033, 56349, 67738, 68142, 69076, 71175, 72584, 72931, 74996, 77065, 80750, 93759, 99982, 109685, 213990, 217124, 234371, 235323, 244694, 328572
GO:0030041	actin filament polymerization	GOBP	133	0.0149741	1.09753	0.00104804	0.0224151	enriched	11518, 11845, 12721, 12808, 13860, 14260, 14489, 16798, 18481, 18613, 18643, 18753, 19229, 19720, 20563, 20739, 20742, 21916, 22323, 22351, 23897, 23999, 27361, 50918, 54631, 56699, 66713, 66824, 66898, 68089, 68524, 73910, 74117, 76932, 101314, 102774, 104445, 105855, 107351, 170643, 211401, 215280, 225288, 227753, 231830, 330319, 544963
GO:0045648	positive regulation of erythrocyte differentiation	GOBP	21	0.0199657	1.1321	0.0010655	0.0226246	enriched	14460, 15469, 15902, 16323, 16331, 23871, 98366, 99982, 105855
GO:0055114	oxidation-reduction process	GOBP	761	0.0105603	1.06783	0.00107084	0.0226564	enriched	11428, 11429, 11529, 11532, 11669, 11671, 11692, 11757, 11758, 11807, 12028, 12039, 12040, 12122, 12176, 12408, 12460, 12583, 12662, 12857, 12868, 12892, 12972, 13017, 13056, 13057, 13058, 13078, 13106, 13123, 13167, 13177, 13861, 14069, 14104, 14137, 14567, 14571, 14583, 14661, 14775, 14782, 14783, 14936, 15203, 15368, 15446, 16002, 16195, 16337, 16367, 16832, 16922, 16949, 17436, 17449, 17768, …
GO:0030178	negative regulation of Wnt signaling pathway	GOBP	126	0.0150863	1.09829	0.00109045	0.0229197	enriched	11789, 12006, 12389, 12443, 12558, 13198, 13653, 14368, 14632, 14634, 14734, 14783, 16348, 16798, 16971, 18099, 18128, 18230, 20583, 20665, 20674, 27041, 50523, 50781, 56274, 56470, 70300, 70433, 72345, 77583, 97064, 106042, 107746, 140577, 228357, 328949, 433759
GO:0045793	positive regulation of cell size	GOBP	13	0.0212885	1.14145	0.00109104	0.0229197	enriched	11622, 12421, 12567, 99982, 328572
GO:0030036	actin cytoskeleton organization	GOBP	516	0.0114576	1.0738	0.00109831	0.022977	enriched	11472, 11518, 11641, 11845, 11856, 11857, 12331, 12372, 12373, 12488, 12614, 12631, 12632, 12633, 12721, 12808, 13007, 13609, 13640, 13731, 13839, 13860, 14086, 14107, 14163, 14178, 14201, 14219, 14245, 14260, 14489, 14739, 14745, 15162, 15901, 16412, 16416, 16419, 16590, 16691, 16798, 16897, 16952, 16971, 17258, 17886, 17888, 17996, 18015, 18016, 18479, 18481, 18590, 18613, 18643, 18708, 18753, …
GO:0071482	cellular response to light stimulus	GOBP	74	0.0165033	1.10801	0.00110156	0.022977	enriched	12018, 12028, 12530, 12575, 12914, 16210, 17380, 18708, 18971, 19272, 20174, 20877, 22591, 52033, 67738, 68142, 69076, 72584, 74996, 80750, 93759, 99982, 109685, 213990, 217124, 234371, 235323, 328572
GO:0006974	cellular response to DNA damage stimulus	GOBP	589	0.0111345	1.07165	0.00110569	0.022982	enriched	11789, 11792, 11909, 12006, 12018, 12021, 12028, 12050, 12122, 12190, 12227, 12366, 12367, 12443, 12450, 12505, 12566, 12575, 12611, 12759, 12952, 13006, 13197, 13404, 13649, 13836, 13871, 14048, 14156, 14670, 14884, 14885, 14897, 15204, 15257, 15258, 15312, 15368, 15574, 16149, 16881, 17193, 17246, 17686, 17688, 17869, 18019, 18140, 18294, 18708, 18752, 18753, 18779, 18950, 18968, 18971, 19357, …
GO:0010632	regulation of epithelial cell migration	GOBP	157	0.0144853	1.0942	0.00111501	0.0230943	enriched	11482, 11502, 11745, 11881, 12159, 12168, 13731, 13836, 14164, 14172, 14178, 14182, 14257, 14389, 14462, 15117, 16416, 16476, 16542, 17295, 17395, 18015, 18128, 18570, 18606, 18643, 18787, 19225, 19229, 19270, 19274, 19878, 20563, 20583, 20692, 20779, 20901, 21667, 21808, 21814, 21825, 22339, 22341, 23871, 23991, 56233, 68750, 68813, 70097, 72674, 73723, 76707, 104831, 230738, 243362, 328949, 330…
GO:0008544	epidermis development	GOBP	242	0.0133375	1.08642	0.00113638	0.0234546	enriched	11671, 11789, 12159, 12192, 12367, 12394, 12560, 12614, 13167, 13388, 13649, 13836, 13871, 14178, 14182, 14365, 14368, 14388, 14562, 14632, 15205, 16323, 16337, 16667, 16798, 16825, 16826, 16952, 17128, 17133, 17134, 17702, 17921, 17936, 17937, 18053, 18103, 18109, 18128, 18508, 18590, 18755, 18822, 19143, 19206, 19207, 19225, 19877, 19878, 20662, 21420, 21781, 21808, 21816, 22295, 22337, 26914, …
GO:0010332	response to gamma radiation	GOBP	39	0.0182071	1.1198	0.00114542	0.023477	enriched	12018, 12028, 12190, 12575, 13653, 14775, 17869, 18950, 20656, 22596, 24086, 57434, 99982, 108138, 211651
GO:0015629	actin cytoskeleton	GOCC	405	0.0118077	1.07614	0.00156193	0.0235266	enriched	11472, 11475, 11518, 11856, 12306, 12331, 12488, 12558, 12631, 12632, 12721, 12808, 13007, 13057, 13191, 13196, 13716, 14086, 14201, 14260, 14489, 14701, 14958, 15162, 16331, 16796, 16897, 17883, 17886, 17888, 17896, 17921, 17929, 17931, 17996, 18000, 18016, 18019, 18519, 19009, 20411, 20525, 20739, 20742, 20743, 20779, 21916, 22138, 22330, 23897, 26446, 27361, 27494, 29856, 29875, 50490, 50918, …
GO:0045596	negative regulation of cell differentiation	GOBP	592	0.0110895	1.07135	0.00115472	0.0235859	enriched	11307, 11482, 11614, 11820, 11845, 12006, 12159, 12192, 12193, 12389, 12443, 12505, 12571, 12579, 12633, 12825, 12831, 12832, 13131, 13196, 13198, 13388, 13389, 13640, 13838, 14114, 14182, 14270, 14357, 14369, 14462, 14562, 14567, 14634, 14745, 14912, 15205, 15375, 15405, 15469, 15901, 15902, 15982, 16149, 16331, 16410, 16412, 16416, 16825, 16852, 16952, 16971, 16998, 17246, 17536, 17702, 17869, …
GO:0050767	regulation of neurogenesis	GOBP	730	0.0105921	1.06804	0.00116575	0.023689	enriched	11421, 11538, 11820, 11845, 11881, 12159, 12168, 12389, 12558, 12579, 12631, 12633, 12808, 12825, 12877, 12977, 13131, 13176, 13196, 13388, 13389, 13631, 13638, 13640, 13838, 14048, 14182, 14270, 14357, 14365, 14462, 14567, 14634, 14745, 14912, 15114, 15205, 15375, 15529, 15901, 15902, 15982, 16177, 16195, 16210, 16412, 16542, 16554, 16590, 16728, 16852, 16971, 16975, 17158, 17165, 17246, 17295, …
GO:0051321	meiotic cell cycle	GOBP	198	0.0138385	1.08981	0.0011678	0.023689	enriched	12190, 12447, 12566, 12877, 13006, 13206, 13404, 14211, 15574, 16337, 17345, 17686, 17688, 17702, 17886, 18413, 19045, 19052, 19183, 19357, 19360, 20112, 20899, 20957, 20962, 21749, 21973, 21974, 22026, 23997, 28114, 30939, 50796, 54204, 56371, 57434, 57749, 66713, 66934, 67010, 67981, 68298, 70099, 71241, 71765, 72634, 74075, 74117, 75388, 75828, 78658, 83456, 83558, 83560, 94244, 98558, 104271,…
GO:0048608	reproductive structure development	GOBP	380	0.0121313	1.07831	0.00121998	0.0246628	enriched	11535, 11614, 11622, 11757, 11789, 12018, 12028, 12050, 12142, 12159, 12168, 12190, 12192, 12211, 12394, 12443, 12449, 12505, 12576, 12591, 12606, 12841, 13123, 13393, 13404, 13649, 13875, 14178, 14228, 14367, 14388, 14460, 14462, 14531, 15205, 15375, 15405, 16007, 16323, 16337, 16401, 16410, 16542, 16590, 16691, 17128, 17289, 17295, 17300, 17390, 17684, 17977, 18127, 18128, 18129, 18211, 18783, …
904533	Gene Products, nef	MeSH	26	0.0246976	1.16589	0.00020215	0.0250034	enriched	14783, 50796, 52535, 57321, 78801, 79044, 327762, 330355
GO:0000228	nuclear chromosome	GOCC	486	0.0112799	1.07262	0.00172763	0.0254913	enriched	11799, 12190, 12417, 12419, 12591, 12914, 12995, 13006, 13404, 13435, 13619, 14106, 14156, 14211, 14462, 14534, 14957, 14958, 15078, 15574, 16319, 16476, 16825, 17128, 17191, 17216, 17218, 17258, 17300, 17684, 17686, 17688, 17869, 17977, 18019, 18140, 18393, 18477, 18508, 18519, 18968, 18969, 18971, 18999, 19045, 19046, 19357, 19360, 19362, 19646, 19704, 19708, 19821, 20020, 20174, 20181, 20185, …
GO:0043467	regulation of generation of precursor metabolites and energy	GOBP	82	0.0161078	1.10529	0.00127768	0.0255667	enriched	12176, 14583, 14783, 16002, 16337, 16367, 16418, 17869, 18387, 18439, 18648, 18706, 19045, 19046, 20185, 20411, 22113, 52637, 58805, 67267, 68943, 72170, 74747, 102060, 105675, 108079, 216805, 384783
GO:0007498	mesoderm development	GOBP	104	0.0154443	1.10074	0.00132025	0.0262405	enriched	12159, 12168, 12192, 13389, 13836, 14042, 14048, 14106, 14182, 14562, 15194, 16323, 17125, 17128, 17294, 17300, 17684, 18016, 18999, 19052, 20336, 20997, 21386, 21407, 21676, 22339, 22415, 22772, 26940, 58198, 68151, 211151, 216850, 224143
GO:0032271	regulation of protein polymerization	GOBP	155	0.01437	1.09341	0.00134372	0.026585	enriched	11518, 11789, 11845, 12389, 12576, 12721, 13860, 14228, 14260, 14489, 16765, 16798, 17762, 18481, 18613, 18643, 18753, 19229, 19720, 20393, 20563, 20739, 20742, 21916, 22323, 22351, 23897, 23999, 27050, 50918, 54631, 56699, 56742, 66713, 66824, 66898, 68089, 68524, 72205, 73910, 74117, 75991, 76932, 101314, 102774, 104445, 105855, 107351, 170643, 215280, 225288, 227753, 330319, 544963
GO:0043518	negative regulation of DNA damage response, signal transduction by p53 class mediator	GOBP	14	0.0209101	1.13877	0.00134659	0.026585	enriched	12505, 16149, 17246, 20583, 59092, 93759, 99982
GO:0008284	positive regulation of cell proliferation	GOBP	767	0.0103622	1.06652	0.00136153	0.026613	enriched	11482, 11487, 11534, 11535, 11757, 12159, 12168, 12182, 12211, 12306, 12389, 12426, 12428, 12443, 12444, 12511, 12560, 12566, 12567, 12571, 12575, 12576, 12591, 12633, 12721, 12759, 12765, 12785, 12931, 12977, 12995, 13057, 13123, 13388, 13482, 13601, 13609, 13649, 13653, 13731, 14048, 14062, 14066, 14164, 14171, 14172, 14178, 14182, 14219, 14257, 14365, 14369, 14389, 14460, 14538, 14632, 14634, …
GO:0000271	polysaccharide biosynthetic process	GOBP	58	0.0169914	1.11137	0.00135859	0.026613	enriched	14042, 14583, 14783, 14936, 15117, 16002, 16337, 16367, 18033, 18682, 19045, 19046, 20411, 23908, 53412, 53625, 67300, 68961, 217166, 384783
GO:0034637	cellular carbohydrate biosynthetic process	GOBP	57	0.0170406	1.11171	0.00135508	0.026613	enriched	14042, 14583, 14718, 14783, 14936, 15117, 16002, 16337, 16367, 18682, 19045, 19046, 20411, 23908, 53412, 53625, 68961, 71780, 217166, 384783
GO:0061458	reproductive system development	GOBP	383	0.0120229	1.07758	0.00136702	0.026632	enriched	11535, 11614, 11622, 11757, 11789, 12018, 12028, 12050, 12142, 12159, 12168, 12190, 12192, 12211, 12394, 12443, 12449, 12505, 12576, 12591, 12606, 12841, 13123, 13393, 13404, 13649, 13875, 14178, 14228, 14367, 14388, 14460, 14462, 14531, 15205, 15375, 15405, 16007, 16323, 16337, 16401, 16410, 16542, 16590, 16691, 17128, 17289, 17295, 17300, 17390, 17684, 17977, 18127, 18128, 18129, 18211, 18783, …
GO:1900077	negative regulation of cellular response to insulin stimulus	GOBP	38	0.0181313	1.11927	0.00137324	0.0266652	enriched	14783, 16367, 18751, 18753, 53322, 98496, 107351, 216233, 232339
GO:1904018	positive regulation of vasculature development	GOBP	134	0.014708	1.09571	0.00142455	0.0274808	enriched	11482, 11518, 11535, 11745, 12226, 12394, 12633, 12765, 13058, 13078, 13388, 13601, 13653, 13805, 13846, 14066, 14164, 14254, 15258, 15368, 16416, 16542, 16590, 16854, 17395, 18127, 18128, 18570, 18751, 18787, 19225, 19229, 21825, 22339, 22341, 23871, 23991, 56233, 70086, 70097, 93759, 107869, 223780, 230738
GO:0030855	epithelial cell differentiation	GOBP	489	0.0113623	1.07316	0.00147287	0.028137	enriched	11482, 11614, 11789, 12142, 12159, 12168, 12192, 12226, 12367, 12389, 12443, 12558, 12560, 12571, 12576, 12591, 13388, 13393, 13805, 13836, 13852, 13871, 14048, 14182, 14369, 14462, 14562, 14632, 14739, 14775, 15205, 15375, 15901, 15902, 16476, 16542, 16598, 16667, 16772, 16798, 16952, 17128, 17133, 17134, 17295, 17698, 17702, 17921, 18012, 18016, 18103, 18109, 18128, 18129, 18211, 18508, 18613, …
GO:0006479	protein methylation	GOBP	135	0.0146513	1.09533	0.00149094	0.0282083	enriched	12226, 12227, 14462, 14957, 15469, 16468, 17128, 17769, 20638, 22083, 26914, 27374, 52615, 57295, 59035, 66317, 66423, 66617, 67674, 68911, 70779, 71241, 71458, 73251, 73703, 74016, 74322, 76804, 77305, 77683, 93759, 94246, 99890, 99982, 103136, 110147, 140858, 192195, 193796, 208266, 214162, 214572, 225363, 231051, 234135, 238247, 244694, 329504, 381022, 664799
GO:0008213	protein alkylation	GOBP	135	0.0146513	1.09533	0.00149094	0.0282083	enriched	12226, 12227, 14462, 14957, 15469, 16468, 17128, 17769, 20638, 22083, 26914, 27374, 52615, 57295, 59035, 66317, 66423, 66617, 67674, 68911, 70779, 71241, 71458, 73251, 73703, 74016, 74322, 76804, 77305, 77683, 93759, 94246, 99890, 99982, 103136, 110147, 140858, 192195, 193796, 208266, 214162, 214572, 225363, 231051, 234135, 238247, 244694, 329504, 381022, 664799
GO:0043254	regulation of protein complex assembly	GOBP	311	0.0124699	1.08058	0.00150818	0.0282218	enriched	11518, 11622, 11789, 11845, 12028, 12122, 12389, 12576, 12721, 12759, 13196, 13860, 14086, 14228, 14260, 14489, 15162, 16210, 16475, 16476, 16765, 16798, 17698, 17762, 17967, 18481, 18613, 18643, 18753, 19106, 19184, 19229, 19305, 19720, 20393, 20563, 20660, 20739, 20742, 20779, 20910, 21916, 22323, 22339, 22351, 23897, 23996, 23999, 27050, 50918, 53624, 53626, 54343, 54631, 54673, 56424, 56699, …
GO:0014013	regulation of gliogenesis	GOBP	108	0.0152244	1.09923	0.00152866	0.0284659	enriched	12159, 12558, 12579, 12977, 13131, 13389, 13838, 14912, 15205, 15902, 16195, 17869, 18015, 18016, 18109, 18128, 18606, 18755, 19283, 19744, 20238, 20665, 20666, 20720, 21367, 22352, 23966, 27374, 28000, 30948, 50849, 50913, 56711, 63953, 67490, 71918, 83557, 192119, 433759
GO:0060259	regulation of feeding behavior	GOBP	29	0.0187782	1.12378	0.0015389	0.0285377	enriched	16847, 21338, 22044, 232339
GO:0071480	cellular response to gamma radiation	GOBP	19	0.0199418	1.13194	0.0015484	0.0285631	enriched	12575, 13653, 22596, 24086, 99982
GO:0009067	aspartate family amino acid biosynthetic process	GOBP	20	0.0197791	1.13079	0.00158676	0.0290889	enriched	12036, 14718, 14719, 17769, 27053, 67870, 67873, 76615, 104923, 107869, 108156
GO:0031175	neuron projection development	GOBP	834	0.0100188	1.06424	0.00166998	0.0304855	enriched	11535, 11538, 11787, 11789, 11820, 11845, 11881, 12159, 12168, 12227, 12505, 12558, 12631, 12633, 12759, 12808, 12877, 13131, 13138, 13176, 13196, 13631, 13637, 13638, 13640, 13643, 13649, 13838, 13839, 14042, 14182, 14260, 14270, 14365, 14432, 14462, 14472, 14567, 14634, 14745, 15114, 15205, 15394, 15469, 15529, 15901, 15982, 16210, 16412, 16452, 16467, 16476, 16542, 16554, 16573, 16728, 16765, …
GO:0016571	histone methylation	GOBP	109	0.0151256	1.09856	0.00167327	0.0304855	enriched	14462, 14957, 15469, 16468, 17128, 17769, 22083, 26914, 27374, 52615, 59035, 66317, 66423, 68911, 70779, 71241, 71458, 73251, 73703, 74016, 74322, 76804, 77305, 77683, 93759, 94246, 99890, 99982, 103136, 110147, 140858, 192195, 193796, 208266, 214162, 214572, 231051, 234135, 238247, 244694, 381022, 664799
911944	T-Lymphocyte Subsets	MeSH	34	0.0234727	1.15705	0.00026668	0.0310446	enriched	14783, 16728, 16763, 18293, 20957, 26385, 52530, 60611, 67009, 101358, 212712
GO:0008154	actin polymerization or depolymerization	GOBP	162	0.0140516	1.09125	0.00172299	0.0311987	enriched	11472, 11518, 11845, 12331, 12631, 12632, 12721, 12808, 13860, 14260, 14489, 16798, 18481, 18613, 18643, 18753, 19229, 19720, 20563, 20739, 20742, 21916, 22323, 22351, 23897, 23999, 27361, 50918, 54631, 56431, 56699, 65970, 66713, 66824, 66898, 68089, 68524, 73723, 73910, 74117, 76932, 101314, 102774, 104445, 105855, 107351, 110380, 170643, 211401, 213556, 215280, 225288, 227753, 231637, 231830, …
GO:0032352	positive regulation of hormone metabolic process	GOBP	16	0.0203258	1.13464	0.00173964	0.031404	enriched	14462, 16002, 99982
GO:0007127	meiosis I	GOBP	89	0.0156262	1.10198	0.00175939	0.0314718	enriched	12190, 12447, 12877, 13206, 13404, 17686, 17688, 19360, 20899, 20957, 20962, 21749, 21973, 21974, 23997, 30939, 50796, 57434, 67981, 71241, 74075, 83456, 83558, 98558, 104271, 110147, 193838, 211651, 230861, 235559, 239083
GO:0046886	positive regulation of hormone biosynthetic process	GOBP	13	0.0208922	1.13864	0.00177762	0.0317018	enriched	16002, 99982
GO:0080135	regulation of cellular response to stress	GOBP	474	0.0112818	1.07263	0.00179711	0.0319528	enriched	11692, 11792, 11911, 12006, 12018, 12028, 12122, 12421, 12505, 12571, 12611, 12759, 12952, 13197, 13649, 13838, 14004, 14048, 14219, 14257, 14367, 14388, 14528, 14775, 14897, 15258, 15259, 15277, 15469, 16149, 16210, 16475, 16906, 17246, 17295, 17318, 17846, 17869, 18294, 18387, 18477, 18479, 18626, 18708, 18752, 18753, 18779, 18950, 19106, 19156, 19211, 19229, 19362, 20185, 20482, 20583, 20656, …
GO:0001784	phosphotyrosine binding	GOMF	17	0.0207004	1.13729	0.000898193	0.0323131	enriched	14783, 20416
GO:0048598	embryonic morphogenesis	GOBP	573	0.0108104	1.06949	0.00183345	0.032501	enriched	11535, 12028, 12159, 12168, 12192, 12614, 12631, 12808, 12814, 12824, 12831, 12832, 13138, 13388, 13805, 13836, 13875, 14042, 14048, 14106, 14119, 14182, 14254, 14365, 14367, 14368, 14369, 14462, 14472, 14531, 14534, 14562, 14632, 14634, 14734, 15194, 15205, 15209, 15257, 15258, 15378, 15394, 15400, 15405, 15438, 15530, 15902, 16007, 16206, 16323, 16401, 16410, 16558, 16764, 16798, 16825, 17125, …
GO:0051962	positive regulation of nervous system development	GOBP	497	0.0111378	1.07167	0.0018644	0.0329508	enriched	11421, 11538, 11881, 12159, 12168, 12633, 12808, 12877, 12977, 13131, 13176, 13389, 13631, 13640, 13838, 14182, 14365, 14632, 14634, 14745, 14912, 15114, 15205, 15375, 15902, 16177, 16195, 16210, 16412, 16542, 16590, 16728, 16975, 17158, 17165, 17295, 17762, 17869, 17977, 18010, 18012, 18014, 18053, 18102, 18103, 18128, 18189, 18208, 18211, 18481, 18508, 18519, 18606, 18755, 19205, 19229, 19283, …
GO:0003779	actin binding	GOMF	345	0.0126439	1.08175	0.00094442	0.0331671	enriched	11472, 11518, 12331, 12631, 12632, 12721, 12808, 13138, 13649, 13726, 13860, 14086, 14201, 14260, 15444, 16210, 16351, 16412, 16475, 16796, 17357, 17698, 17754, 17883, 17886, 17888, 17896, 17921, 18016, 18127, 18643, 19201, 20739, 20742, 21894, 21916, 22068, 22138, 22157, 22323, 22330, 22351, 22379, 23999, 27360, 27361, 27428, 30948, 54366, 56376, 56431, 57342, 58234, 65970, 66713, 66822, 66898, …
GO:0032024	positive regulation of insulin secretion	GOBP	74	0.0160617	1.10497	0.00189144	0.0332298	enriched	14645, 14661, 16452, 16573, 16847, 19205, 22044, 28146, 53357, 64384, 67151, 67389, 74551, 93692, 93759, 216856, 268860, 384783
GO:0051495	positive regulation of cytoskeleton organization	GOBP	169	0.0138585	1.08994	0.0019036	0.0332991	enriched	11472, 11789, 11845, 12389, 12576, 12631, 12632, 12721, 14219, 14260, 14745, 15162, 15901, 17762, 18016, 18479, 18643, 19229, 19720, 19878, 20194, 20410, 22323, 23897, 27050, 50490, 54631, 56431, 56699, 56742, 66713, 66824, 66898, 68089, 68524, 74117, 75991, 76932, 101314, 104445, 105855, 109880, 170643, 211401, 215280, 227753, 234094, 320472, 328572, 330319, 442801, 544963
GO:1902230	negative regulation of intrinsic apoptotic signaling pathway in response to DNA damage	GOBP	21	0.019492	1.12878	0.00190668	0.0332991	enriched	12122, 12505, 12759, 16149, 20583, 69076, 74996, 75736, 93759, 99982, 234371
GO:0051493	regulation of cytoskeleton organization	GOBP	393	0.0116898	1.07535	0.001919	0.0334155	enriched	11472, 11518, 11789, 11845, 11856, 11857, 12334, 12338, 12389, 12449, 12488, 12576, 12614, 12631, 12632, 12721, 13609, 13640, 13839, 13860, 14086, 14219, 14228, 14260, 14489, 14745, 15162, 15901, 16416, 16765, 16798, 16971, 17245, 17318, 17754, 17762, 17996, 18016, 18479, 18481, 18571, 18613, 18643, 18708, 18753, 19229, 19720, 19877, 19878, 20194, 20349, 20393, 20410, 20563, 20620, 20739, 20742, …
GO:0035591	signaling adaptor activity	GOMF	44	0.0180225	1.11852	0.00098983	0.0339535	enriched	13449, 13860, 14389, 14783, 16367, 16923, 20218, 20399, 20411, 70834, 75547, 107746, 216233, 226250, 327826
GO:0042162	telomeric DNA binding	GOMF	27	0.019314	1.12753	0.00103419	0.0346687	enriched	11792, 11991, 19360, 19704, 21749, 22596, 28113, 53379, 57321, 99982, 229512, 233789, 326622
GO:0007417	central nervous system development	GOBP	712	0.0102121	1.06552	0.00206265	0.0356018	enriched	11671, 11803, 11820, 11881, 12028, 12159, 12190, 12227, 12394, 12558, 12570, 12614, 12751, 12759, 12824, 12825, 12950, 13003, 13004, 13131, 13167, 13176, 13388, 13389, 13609, 13640, 13649, 13799, 13805, 13838, 13839, 13871, 14042, 14182, 14270, 14365, 14368, 14397, 14472, 14531, 14534, 14632, 14634, 14712, 14725, 14912, 15114, 15194, 15205, 15209, 15394, 15530, 15902, 16195, 16323, 16409, 16412, …
GO:0071479	cellular response to ionizing radiation	GOBP	51	0.0169963	1.11141	0.00205878	0.0356018	enriched	12444, 12575, 13197, 13653, 14462, 15574, 19362, 20583, 22596, 24086, 56349, 68142, 71175, 72931, 77065, 93759, 99982, 244694
GO:0010977	negative regulation of neuron projection development	GOBP	136	0.0143398	1.09321	0.00212448	0.0364558	enriched	11845, 13131, 13196, 13838, 14567, 14745, 15205, 15901, 15982, 16852, 16971, 17246, 18053, 18208, 18858, 19158, 19211, 19270, 19283, 20349, 20354, 20563, 20620, 20745, 22068, 22352, 22415, 23991, 26921, 29869, 59035, 70369, 70433, 74117, 74498, 101490, 107351, 228357, 233781, 244058, 270120, 331401, 380711
GO:0006006	glucose metabolic process	GOBP	158	0.0139358	1.09047	0.00214624	0.0366494	enriched	11911, 12952, 14534, 14571, 14583, 14783, 15277, 15378, 16002, 16337, 16367, 16847, 17869, 17978, 18519, 18597, 18648, 18706, 18708, 18746, 19045, 19046, 20411, 20779, 21991, 22113, 27273, 28146, 67389, 68263, 70974, 72674, 74551, 75805, 93759, 140858, 217166, 228026, 230796, 235339, 320706, 384783
GO:1902254	negative regulation of intrinsic apoptotic signaling pathway by p53 class mediator	GOBP	14	0.0205252	1.13605	0.00214818	0.0366494	enriched	12505, 16149, 69076, 75736, 93759, 99982
903050	Antigen-Presenting Cells	MeSH	18	0.0256887	1.17309	0.000337462	0.0371021	enriched	13058, 14783, 57321, 60611
903385	B-Lymphocytes	MeSH	66	0.0208333	1.13823	0.000360094	0.0375066	enriched	14396, 14534, 14775, 14783, 15277, 16763, 23792, 27393, 52637, 66054, 66194, 66413, 68303, 74155, 74781, 104662
GO:0031334	positive regulation of protein complex assembly	GOBP	174	0.0136585	1.08859	0.00220899	0.0375782	enriched	11622, 11789, 11845, 12028, 12122, 12389, 12576, 12721, 13196, 14086, 14260, 16475, 16476, 17698, 17762, 18643, 19184, 19229, 19720, 20779, 22323, 22339, 23996, 27050, 54631, 54673, 56424, 56699, 56742, 66713, 66824, 66898, 68089, 68524, 71902, 72333, 74117, 75739, 75991, 76932, 101314, 104445, 105855, 116837, 170643, 171543, 215280, 227753, 269254, 330319, 544963
GO:0016570	histone modification	GOBP	346	0.0118755	1.07659	0.0022577	0.0382463	enriched	12190, 12914, 13619, 14048, 14245, 14462, 14534, 14897, 14957, 15469, 16452, 16468, 16825, 17128, 17769, 17847, 17977, 18125, 18140, 18519, 18600, 18602, 18626, 18673, 18751, 18753, 19060, 19712, 19821, 20174, 20185, 20583, 20592, 20877, 21423, 22083, 22194, 22339, 24075, 26404, 26914, 27374, 28019, 30841, 30941, 52615, 53890, 56397, 56505, 59026, 59035, 66317, 66423, 68729, 68911, 68943, 69612, …
GO:0043414	macromolecule methylation	GOBP	207	0.0131826	1.08537	0.00227082	0.038299	enriched	12226, 12227, 13206, 13435, 14462, 14791, 14911, 14957, 15201, 15469, 16468, 17128, 17193, 17769, 18706, 20638, 21849, 22083, 22715, 23942, 26914, 27374, 28114, 52615, 54343, 54427, 56095, 57295, 57773, 59035, 66317, 66423, 66617, 67493, 67674, 67897, 68911, 70779, 71241, 71458, 72634, 73251, 73703, 74016, 74322, 76804, 77305, 77683, 83456, 93759, 94244, 94246, 98558, 99890, 99982, 103136, 110109…
GO:0045597	positive regulation of cell differentiation	GOBP	865	0.00969805	1.06212	0.00227962	0.0383379	enriched	11421, 11482, 11535, 11538, 11789, 11881, 12006, 12142, 12159, 12168, 12192, 12226, 12261, 12394, 12447, 12591, 12606, 12633, 12759, 12808, 12842, 12877, 12977, 13131, 13176, 13389, 13631, 13640, 13805, 13838, 14119, 14172, 14182, 14219, 14254, 14365, 14460, 14462, 14538, 14634, 14733, 14739, 14745, 14747, 14912, 15114, 15117, 15205, 15375, 15469, 15902, 16007, 16149, 16177, 16195, 16210, 16323, …
GO:0051090	regulation of sequence-specific DNA binding transcription factor activity	GOBP	321	0.0120415	1.0777	0.00232019	0.0387072	enriched	11614, 11745, 11746, 11757, 11909, 12034, 12289, 12611, 12633, 12759, 12914, 13078, 13198, 13839, 14106, 14368, 14489, 14747, 15162, 15258, 15368, 15375, 15378, 15901, 15902, 15982, 16452, 16590, 16975, 16978, 17131, 17702, 17846, 18012, 18014, 18211, 18214, 18751, 18755, 19106, 19122, 19206, 19211, 19720, 19820, 19821, 20747, 20821, 21423, 21672, 21814, 22339, 22772, 23991, 24058, 24105, 26565, …
917774	Scavenger receptor cysteine-rich domain	PFAM	10	0.0221846	1.14782	0.000228655	0.0391001	enriched	14772, 17246, 18647, 19166, 27801, 228432
GO:0010035	response to inorganic substance	GOBP	324	0.012005	1.07746	0.00235718	0.0391956	enriched	11428, 11502, 11690, 11747, 11757, 11792, 11991, 12176, 12367, 12389, 12460, 12567, 12576, 12606, 12633, 12780, 13078, 13649, 14450, 14528, 14567, 14661, 14775, 14854, 15194, 15368, 15370, 15902, 16210, 16410, 16476, 16691, 16818, 16881, 16952, 17258, 17295, 17390, 17967, 18021, 18127, 18439, 18477, 18570, 18575, 18753, 18783, 19053, 19122, 19156, 19206, 19229, 19395, 20191, 20322, 20656, 20852, …
GO:0010634	positive regulation of epithelial cell migration	GOBP	98	0.0151011	1.09839	0.00241986	0.0398621	enriched	11502, 11745, 12159, 12168, 14164, 14172, 14178, 14182, 14257, 14389, 14462, 15117, 16416, 16476, 16542, 17295, 17395, 18570, 18606, 18643, 18787, 19225, 19229, 19878, 20583, 20692, 20779, 21667, 21808, 21825, 22339, 22341, 23871, 23991, 56233, 68750, 68813, 70097, 76707, 230738, 330662
GO:0060251	regulation of glial cell proliferation	GOBP	29	0.0183989	1.12114	0.00242433	0.0398621	enriched	12579, 15205, 17869, 18128, 18755, 20238, 20666, 22352, 50849, 56711, 67490, 192119
GO:0032373	positive regulation of sterol transport	GOBP	18	0.0197146	1.13034	0.00243645	0.0398621	enriched	11303, 11307, 16891, 16971, 18830, 19206, 20280, 93759, 110460
GO:0032376	positive regulation of cholesterol transport	GOBP	18	0.0197146	1.13034	0.00243645	0.0398621	enriched	11303, 11307, 16891, 16971, 18830, 19206, 20280, 93759, 110460
GO:0002043	blood vessel endothelial cell proliferation involved in sprouting angiogenesis	GOBP	10	0.0213738	1.14206	0.00243778	0.0398621	enriched	12159, 13836, 22339
GO:0060284	regulation of cell development	GOBP	836	0.00969534	1.0621	0.00251696	0.0409264	enriched	11421, 11538, 11820, 11845, 11881, 12006, 12159, 12168, 12261, 12389, 12394, 12558, 12579, 12631, 12633, 12808, 12818, 12825, 12877, 12977, 13131, 13176, 13196, 13388, 13389, 13631, 13638, 13640, 13838, 14048, 14114, 14182, 14270, 14357, 14365, 14462, 14567, 14634, 14739, 14745, 14912, 15114, 15117, 15205, 15375, 15529, 15901, 15902, 15982, 16177, 16195, 16210, 16412, 16416, 16542, 16554, 16590, …
GO:0010721	negative regulation of cell development	GOBP	291	0.0122165	1.07888	0.00253431	0.0409367	enriched	11820, 11845, 12159, 12389, 12579, 12825, 13131, 13196, 13388, 13389, 13640, 13838, 14114, 14270, 14357, 14567, 14634, 14745, 14912, 15205, 15901, 15902, 15982, 16412, 16852, 16971, 17246, 18015, 18053, 18109, 18128, 18208, 18508, 18536, 18858, 19158, 19211, 19270, 19283, 19712, 20349, 20354, 20563, 20620, 20660, 20666, 20674, 20745, 21367, 22068, 22352, 22415, 22422, 23991, 26921, 28000, 29869, …
GO:0045104	intermediate filament cytoskeleton organization	GOBP	35	0.0178373	1.11723	0.00255877	0.0411565	enriched	13346, 16667, 16668, 17772, 19132, 22352, 23950, 50769, 93687, 109620, 110157, 110616, 245944
GO:0051961	negative regulation of nervous system development	GOBP	284	0.0122571	1.07915	0.00259975	0.0416044	enriched	11820, 11845, 12159, 12389, 12579, 12825, 13131, 13196, 13388, 13389, 13838, 14270, 14357, 14567, 14634, 14745, 14912, 15205, 15901, 15902, 15982, 16412, 16852, 16971, 17246, 18015, 18053, 18109, 18128, 18208, 18508, 18536, 18858, 19158, 19211, 19270, 19283, 19712, 20349, 20354, 20563, 20620, 20660, 20666, 20674, 20745, 21367, 22068, 22158, 22352, 22415, 22422, 23991, 26921, 28000, 29869, 50849, …
GO:0014048	regulation of glutamate secretion	GOBP	22	0.0190974	1.12601	0.00261235	0.0416776	enriched	18439, 22044
GO:0010256	endomembrane system organization	GOBP	461	0.0110301	1.07095	0.00267149	0.0425061	enriched	11303, 11472, 11773, 11845, 11891, 11931, 12297, 12306, 12372, 12389, 12558, 12759, 12831, 13196, 13429, 13483, 13731, 13836, 13852, 15194, 16412, 16500, 16573, 16668, 17274, 17988, 18439, 18708, 18753, 19153, 19205, 19206, 19211, 19305, 19330, 19338, 19376, 19877, 19878, 20168, 20194, 20411, 20720, 20739, 20742, 20908, 20910, 20955, 21808, 22038, 23969, 23991, 26903, 26941, 27008, 27374, 50850, …
GO:1901607	alpha-amino acid biosynthetic process	GOBP	59	0.0163651	1.10705	0.00271941	0.0428881	enriched	12036, 14645, 14660, 14661, 14718, 14719, 17769, 18600, 18602, 20425, 27053, 56454, 66194, 67870, 67873, 69051, 76615, 100678, 104923, 107272, 107869, 108037, 108156, 216456, 227231, 381290
GO:0033628	regulation of cell adhesion mediated by integrin	GOBP	32	0.0180288	1.11856	0.00272455	0.0428881	enriched	11502, 13078, 13482, 13836, 16416, 18787, 18792, 21808, 23991, 105855, 108101, 170758
GO:0045103	intermediate filament-based process	GOBP	36	0.0176939	1.11623	0.00276385	0.0433909	enriched	13346, 16667, 16668, 17772, 19132, 22352, 23950, 50769, 93687, 109620, 110157, 110616, 245944
910837	Vitamin K	MeSH	10	0.027809	1.18865	0.000444391	0.0439725	enriched	20660, 20662, 23980, 170676, 319934, 545554
GO:0010595	positive regulation of endothelial cell migration	GOBP	59	0.0163307	1.10682	0.00282993	0.0441874	enriched	11745, 12159, 12168, 14164, 14172, 14182, 14257, 14462, 16416, 16542, 17295, 18570, 19225, 19229, 19878, 20583, 20692, 21667, 21825, 22339, 22341, 23871, 23991, 56233, 70097, 230738
GO:0005003	ephrin receptor activity	GOMF	16	0.0204524	1.13553	0.00150918	0.0445209	enriched	13836, 13838, 13839, 13846, 18211
GO:0048570	notochord morphogenesis	GOBP	11	0.0209569	1.1391	0.0028854	0.0448225	enriched	13836, 14632, 20997
GO:0031060	regulation of histone methylation	GOBP	55	0.0164934	1.10794	0.00292044	0.0451291	enriched	14462, 16468, 17128, 17769, 22083, 26914, 66317, 68911, 71241, 71458, 73251, 73703, 74016, 76804, 93759, 99982, 110147, 193796, 214162, 244694, 664799
GO:0014009	glial cell proliferation	GOBP	38	0.0174764	1.11473	0.00299599	0.0459359	enriched	12579, 12759, 13167, 15205, 17869, 18016, 18128, 18755, 20238, 20666, 22352, 50849, 56711, 67490, 77125, 192119
GO:0030199	collagen fibril organization	GOBP	36	0.0176176	1.11571	0.00301847	0.0461607	enriched	12306, 12814, 12818, 12824, 12825, 12831, 12832, 12842, 12843, 13078, 17300, 18015, 18214, 21808, 94352
GO:0051017	actin filament bundle assembly	GOBP	126	0.0142227	1.09241	0.0030914	0.0467911	enriched	11518, 11856, 13609, 13860, 14086, 14219, 14745, 15901, 16419, 18016, 18479, 18643, 18708, 19229, 19877, 20194, 20410, 20411, 20779, 26554, 50490, 58234, 65970, 66898, 76707, 80880, 102774, 102866, 109880, 114774, 208177, 211401, 218194, 234094, 235041, 242553, 268970, 320472, 442801
GO:0061572	actin filament bundle organization	GOBP	126	0.0142227	1.09241	0.0030914	0.0467911	enriched	11518, 11856, 13609, 13860, 14086, 14219, 14745, 15901, 16419, 18016, 18479, 18643, 18708, 19229, 19877, 20194, 20410, 20411, 20779, 26554, 50490, 58234, 65970, 66898, 76707, 80880, 102774, 102866, 109880, 114774, 208177, 211401, 218194, 234094, 235041, 242553, 268970, 320472, 442801
GO:0016051	carbohydrate biosynthetic process	GOBP	148	0.0137886	1.08947	0.00312518	0.0469412	enriched	11911, 12952, 14042, 14534, 14571, 14583, 14718, 14783, 14936, 15117, 15378, 16002, 16337, 16367, 16847, 18033, 18519, 18648, 18682, 19045, 19046, 19229, 20322, 20411, 21991, 23908, 24070, 26384, 26879, 53412, 53625, 58250, 67300, 67389, 68961, 71780, 74551, 75805, 93759, 110208, 140858, 217166, 320706, 384783
GO:0051570	regulation of histone H3-K9 methylation	GOBP	21	0.0190722	1.12584	0.00312295	0.0469412	enriched	16468, 71241, 73251, 76804, 93759, 99982, 110147, 193796, 244694
GO:0010594	regulation of endothelial cell migration	GOBP	101	0.0147937	1.0963	0.00315069	0.0472044	enriched	11482, 11745, 12159, 12168, 13731, 13836, 14164, 14172, 14182, 14257, 14462, 16416, 16542, 17295, 18015, 18128, 18570, 19225, 19229, 19274, 19878, 20563, 20583, 20692, 21667, 21825, 22339, 22341, 23871, 23991, 56233, 70097, 73723, 230738, 243362
GO:0001946	lymphangiogenesis	GOBP	18	0.0194875	1.12875	0.00317187	0.0472816	enriched	11482, 12168, 13836, 14257, 14726, 17300, 19250, 22339, 22341
GO:0036303	lymph vessel morphogenesis	GOBP	18	0.0194875	1.12875	0.00317187	0.0472816	enriched	11482, 12168, 13836, 14257, 14726, 17300, 19250, 22339, 22341
GO:0031345	negative regulation of cell projection organization	GOBP	157	0.0136171	1.08831	0.0031851	0.0473285	enriched	11845, 13131, 13196, 13838, 14567, 14745, 15205, 15901, 15982, 16412, 16852, 16971, 17246, 17758, 18053, 18208, 18753, 18858, 19158, 19211, 19270, 19283, 20349, 20354, 20563, 20620, 20745, 22068, 22352, 22415, 23991, 24064, 26921, 29869, 59035, 70369, 70433, 74117, 74498, 101490, 107351, 228357, 231532, 233781, 244058, 270120, 331401, 380711
GO:0040023	establishment of nucleus localization	GOBP	15	0.0199888	1.13227	0.00320438	0.0474072	enriched	18208, 18221, 26941, 77579, 226751, 319565
GO:0005975	carbohydrate metabolic process	GOBP	454	0.0109144	1.07018	0.00321379	0.0474276	enriched	11605, 11676, 11911, 12952, 13807, 14042, 14376, 14534, 14571, 14583, 14584, 14651, 14667, 14718, 14783, 14936, 15117, 15277, 15378, 16002, 16195, 16337, 16367, 16418, 16832, 16847, 17158, 17159, 17254, 17449, 17869, 17978, 18010, 18033, 18293, 18439, 18519, 18597, 18641, 18648, 18682, 18706, 18708, 18746, 19045, 19046, 19211, 19229, 20185, 20322, 20411, 20440, 20441, 20444, 20447, 20779, 20975, …
GO:0031061	negative regulation of histone methylation	GOBP	19	0.0193172	1.12755	0.00324419	0.0475197	enriched	16468, 26914, 71458, 76804, 99982, 193796, 244694
GO:0006144	purine nucleobase metabolic process	GOBP	15	0.0199796	1.1322	0.00323843	0.0475197	enriched	11821, 14450, 20425, 56318, 67054, 99982
GO:0006520	cellular amino acid metabolic process	GOBP	172	0.0133497	1.0865	0.00329158	0.0480946	enriched	11847, 12036, 12040, 12583, 14450, 14583, 14584, 14600, 14645, 14660, 14661, 14718, 14719, 15115, 15186, 15378, 17769, 18125, 18127, 18263, 19125, 20226, 20425, 20540, 22375, 23874, 27053, 27267, 27393, 52633, 56454, 58875, 66194, 67789, 67870, 67873, 69051, 70120, 70223, 70791, 71807, 71941, 76615, 100678, 104174, 104776, 104923, 107272, 107869, 108037, 108156, 108682, 109093, 109652, 216443, 21…
GO:0044802	single-organism membrane organization	GOBP	664	0.00997646	1.06396	0.00337831	0.0491246	enriched	11303, 11304, 11472, 11736, 11773, 11845, 11909, 11931, 11980, 12018, 12028, 12122, 12176, 12297, 12306, 12389, 12527, 12558, 12662, 12721, 12759, 12831, 13196, 13429, 13483, 13731, 13836, 13852, 14020, 14567, 15194, 15277, 15444, 16401, 16412, 16421, 16500, 16573, 16668, 16952, 17274, 17869, 17988, 18189, 18439, 18479, 18703, 18708, 18753, 18783, 19153, 19206, 19211, 19298, 19305, 19376, 19877, …
GO:0006898	receptor-mediated endocytosis	GOBP	168	0.0133885	1.08676	0.00337872	0.0491246	enriched	11535, 11813, 11947, 12306, 12331, 12389, 12488, 12527, 12765, 13388, 13429, 14725, 14772, 16401, 16412, 16971, 17533, 18779, 18787, 20239, 20404, 20979, 21367, 22042, 22339, 22359, 23969, 27008, 51789, 56089, 65969, 66141, 67300, 72685, 74325, 98366, 101490, 106572, 215114, 234779, 266781, 269774, 544817
GO:2000648	positive regulation of stem cell proliferation	GOBP	43	0.0170317	1.11165	0.00338886	0.049151	enriched	12159, 14365, 14634, 16998, 17075, 18128, 18508, 18567, 20665, 20666, 20674, 21386, 22339, 22341, 73703, 99982
GO:0019882	antigen processing and presentation	GOBP	59	0.0161644	1.10567	0.0034242	0.0495418	enriched	11891, 16149, 19376, 20592, 21825, 65972, 66824, 77706, 77777, 213233
mmu04080	Neuroactive ligand-receptor interaction	KEGG	255	-0.186142	0.314492	5.16361e-08	1.0637e-05	depleted	11556, 12426, 13609, 14062, 14396, 14397, 14408, 14600, 14739, 14745, 14807, 16847, 18387, 18439, 20609, 21338, 53623, 57260, 67168, 70086, 110637, 242443
GO:0005261	cation channel activity	GOMF	278	-0.157432	0.37592	8.58169e-07	0.00025316	depleted	12289, 12290, 12297, 15561, 16410, 16439, 16494, 16500, 16511, 16525, 18439, 19712, 20190, 20191, 20192, 20274, 22068, 72821, 84036, 225030, 225997, 242443, 269356, 269999, 317750, 320560, 338370
GO:0004930	G-protein coupled receptor activity	GOMF	337	-0.108156	0.51061	9.53742e-06	0.000937846	depleted	11556, 11610, 12426, 12614, 12765, 13609, 14062, 14365, 14367, 14368, 14369, 14739, 14745, 14747, 14760, 14807, 15446, 15561, 16004, 16847, 18387, 20609, 21338, 56632, 57260, 64297, 67168, 68465, 70086, 70355, 72674, 94043, 100129, 107934, 232431, 243978, 381810
GO:0005267	potassium channel activity	GOMF	113	-0.325134	0.132579	1.0801e-05	0.000995716	depleted	16494, 16500, 16511, 16525, 19712, 84036, 225030
GO:0034702	ion channel complex	GOCC	245	-0.119647	0.47542	6.62308e-05	0.00140838	depleted	12289, 12290, 12297, 12724, 13483, 13860, 14396, 14397, 14408, 15561, 16494, 16500, 16511, 16525, 19229, 20190, 20191, 20192, 20274, 21367, 53623, 56177, 64209, 66082, 66797, 72821, 76192, 78070, 78339, 78808, 108058, 110637, 216001, 224796, 225030, 228071, 232813, 238161, 242443, 244723, 320460, 382427
GO:0007218	neuropeptide signaling pathway	GOBP	72	-0.594385	0.0248755	1.22947e-05	0.00145151	depleted	18387, 30052, 57260, 70086
GO:0022838	substrate-specific channel activity	GOMF	382	-0.0890251	0.575074	2.43071e-05	0.00199183	depleted	11749, 12289, 12290, 12297, 12724, 12728, 13058, 13521, 14396, 14397, 14408, 14807, 15561, 16410, 16439, 16494, 16500, 16511, 16525, 17339, 18439, 19229, 19712, 20190, 20191, 20192, 20274, 22068, 22333, 22335, 23844, 26372, 53623, 55963, 59095, 64008, 72821, 78339, 84036, 99663, 100604, 110637, 224796, 225030, 225997, 229933, 231549, 242443, 269356, 269999, 317750, 320560, 338370, 382427
GO:0005216	ion channel activity	GOMF	371	-0.0907664	0.568885	2.5876e-05	0.00200879	depleted	11749, 12289, 12290, 12297, 12724, 12728, 13058, 13521, 14396, 14397, 14408, 14807, 15561, 16410, 16439, 16494, 16500, 16511, 16525, 18439, 19229, 19712, 20190, 20191, 20192, 20274, 22068, 22333, 22335, 23844, 26372, 53623, 55963, 59095, 72821, 78339, 84036, 99663, 100604, 110637, 224796, 225030, 225997, 229933, 231549, 242443, 269356, 269999, 317750, 320560, 338370, 382427
GO:1902495	transmembrane transporter complex	GOCC	264	-0.0998987	0.537497	0.000180253	0.00325808	depleted	11931, 11932, 12289, 12290, 12297, 12724, 13483, 13860, 14396, 14397, 14408, 15561, 16494, 16500, 16511, 16525, 19229, 20190, 20191, 20192, 20274, 21367, 22273, 53623, 56177, 64209, 66082, 66797, 67003, 67530, 72821, 76192, 78070, 78339, 78808, 98660, 108058, 110637, 216001, 224796, 225030, 228071, 232813, 238161, 242443, 244723, 320460, 382427
GO:1990351	transporter complex	GOCC	268	-0.098006	0.543857	0.000189408	0.00334005	depleted	11931, 11932, 12289, 12290, 12297, 12724, 13483, 13860, 14396, 14397, 14408, 15561, 16494, 16500, 16511, 16525, 19229, 20190, 20191, 20192, 20274, 21367, 22273, 30059, 53623, 56177, 64209, 66082, 66797, 67003, 67530, 72821, 76192, 78070, 78339, 78808, 98660, 108058, 110637, 216001, 224796, 225030, 228071, 232813, 238161, 242443, 244723, 320460, 382427
GO:0015267	channel activity	GOMF	407	-0.0759274	0.623841	7.21219e-05	0.00462521	depleted	11749, 12028, 12289, 12290, 12297, 12724, 12728, 13058, 13521, 14396, 14397, 14408, 14618, 14807, 15561, 16410, 16439, 16494, 16500, 16511, 16525, 17339, 18439, 19229, 19712, 20190, 20191, 20192, 20274, 22068, 22333, 22335, 23844, 26372, 53333, 53600, 53623, 55963, 59095, 64008, 66169, 72821, 78339, 84036, 99663, 100604, 110637, 223696, 224796, 225030, 225997, 229933, 231549, 242443, 269356, 2699…
GO:0022803	passive transmembrane transporter activity	GOMF	407	-0.0759274	0.623841	7.21219e-05	0.00462521	depleted	11749, 12028, 12289, 12290, 12297, 12724, 12728, 13058, 13521, 14396, 14397, 14408, 14618, 14807, 15561, 16410, 16439, 16494, 16500, 16511, 16525, 17339, 18439, 19229, 19712, 20190, 20191, 20192, 20274, 22068, 22333, 22335, 23844, 26372, 53333, 53600, 53623, 55963, 59095, 64008, 66169, 72821, 78339, 84036, 99663, 100604, 110637, 223696, 224796, 225030, 225997, 229933, 231549, 242443, 269356, 2699…
GO:0022843	voltage-gated cation channel activity	GOMF	132	-0.217507	0.258795	6.87339e-05	0.00462521	depleted	12289, 12290, 12297, 16410, 16494, 16500, 16511, 16525, 19712, 20190, 225030
GO:0007188	adenylate cyclase-modulating G-protein coupled receptor signaling pathway	GOBP	134	-0.191581	0.304039	0.00015816	0.00681473	depleted	11556, 12289, 13609, 14678, 14680, 14687, 14745, 16416, 18387, 19156, 20609, 26941, 27374, 104111, 210044, 223780
GO:0008324	cation transmembrane transporter activity	GOMF	525	-0.0569432	0.701959	0.000153528	0.00905818	depleted	11747, 11927, 11931, 11932, 11944, 11946, 11947, 11950, 11951, 11957, 11973, 12289, 12290, 12297, 12857, 12866, 12868, 12892, 14977, 15561, 16410, 16439, 16494, 16500, 16511, 16525, 17992, 18439, 19712, 19746, 20190, 20191, 20192, 20274, 20498, 20522, 20529, 22042, 22068, 22782, 27425, 53881, 54403, 54411, 66144, 66290, 67075, 67473, 67530, 67547, 67843, 67942, 72821, 75750, 84036, 98660, 103098,…
GO:0005244	voltage-gated ion channel activity	GOMF	178	-0.143989	0.408674	0.00016943	0.00925588	depleted	12289, 12290, 12297, 12724, 12728, 13058, 16410, 16494, 16500, 16511, 16525, 19712, 20190, 20274, 22333, 22335, 26372, 72821, 224796, 225030, 338370
GO:0022832	voltage-gated channel activity	GOMF	178	-0.143989	0.408674	0.00016943	0.00925588	depleted	12289, 12290, 12297, 12724, 12728, 13058, 16410, 16494, 16500, 16511, 16525, 19712, 20190, 20274, 22333, 22335, 26372, 72821, 224796, 225030, 338370
5605522	G alpha (i) signalling events	Reactome	178	-0.168376	0.351204	2.10381e-05	0.00929885	depleted	11820, 12765, 13609, 14678, 14687, 14693, 14696, 14700, 14701, 14704, 14708, 14739, 14745, 16952, 18387, 20609, 56470, 67865, 210044, 381810, 385643, 100043507
GO:0008188	neuropeptide receptor activity	GOMF	39	-1.06316	0.00135072	0.000177581	0.00935474	depleted	20609, 21338
GO:0007187	G-protein coupled receptor signaling pathway, coupled to cyclic nucleotide second messenger	GOBP	145	-0.167011	0.354195	0.000243678	0.00940152	depleted	11556, 12289, 13609, 14678, 14680, 14687, 14745, 16416, 16952, 18387, 19156, 20609, 26941, 27374, 104111, 210044, 223780
GO:0022836	gated channel activity	GOMF	286	-0.0911447	0.567549	0.000213257	0.00996879	depleted	11749, 12289, 12290, 12297, 12724, 12728, 13058, 14396, 14397, 14408, 14807, 15561, 16410, 16439, 16494, 16500, 16511, 16525, 18439, 19229, 19712, 20190, 20191, 20192, 20274, 22333, 22335, 23844, 26372, 53623, 72821, 78339, 84036, 99663, 110637, 224796, 225030, 229933, 242443, 338370
GO:0001653	peptide receptor activity	GOMF	116	-0.216378	0.260617	0.000197252	0.00996879	depleted	11610, 12426, 12765, 14062, 18387, 20609, 21338, 57260, 70086
GO:0015079	potassium ion transmembrane transporter activity	GOMF	144	-0.170101	0.347459	0.00022799	0.0101905	depleted	11931, 11932, 11944, 12892, 16494, 16500, 16511, 16525, 19712, 20498, 84036, 98660, 225030, 317750
GO:0007189	adenylate cyclase-activating G-protein coupled receptor signaling pathway	GOBP	67	-0.378266	0.095295	0.000313322	0.0109819	depleted	11556, 14680, 26941, 104111, 210044, 223780
GO:0005249	voltage-gated potassium channel activity	GOMF	83	-0.297205	0.157708	0.000282222	0.0122435	depleted	16494, 16500, 16511, 16525, 19712, 225030
GO:0008528	G-protein coupled peptide receptor activity	GOMF	112	-0.210055	0.271061	0.000310281	0.0130761	depleted	11610, 12426, 12765, 14062, 18387, 20609, 21338, 57260, 70086
GO:0007186	G-protein coupled receptor signaling pathway	GOBP	616	-0.0402877	0.778511	0.000940074	0.0212235	depleted	11303, 11472, 11556, 11610, 11911, 12289, 12389, 12426, 12614, 12765, 12952, 13609, 14062, 14365, 14367, 14368, 14369, 14396, 14397, 14675, 14678, 14680, 14687, 14693, 14696, 14700, 14701, 14704, 14708, 14739, 14745, 14747, 14760, 14772, 14807, 15194, 15561, 16004, 16337, 16412, 16416, 16452, 16952, 16971, 18125, 18387, 18673, 19156, 20609, 20779, 21338, 21367, 22158, 26385, 26941, 27374, 30052, …
GO:0042745	circadian sleep/wake cycle	GOBP	32	-0.904145	0.0036286	0.00105427	0.0224669	depleted	NA
GO:0022410	circadian sleep/wake cycle process	GOBP	30	-0.952718	0.00268313	0.00131755	0.0262405	depleted	NA
GO:0001664	G-protein coupled receptor binding	GOMF	222	-0.0955358	0.55227	0.000802017	0.0299997	depleted	11421, 11535, 11556, 11803, 12261, 12426, 13429, 13609, 14154, 14369, 14675, 14678, 14687, 14704, 14739, 16452, 18571, 18673, 19156, 19184, 22415, 22422, 26941, 56044, 56424, 68151, 69632, 98417, 99470, 105171, 213498, 216795, 217124, 225362
GO:0042749	regulation of circadian sleep/wake cycle	GOBP	29	-0.92942	0.00310116	0.00169319	0.0307535	depleted	NA
GO:0071804	cellular potassium ion transport	GOBP	147	-0.11653	0.484717	0.00226121	0.0382463	depleted	11472, 11931, 11932, 11944, 12289, 12373, 12389, 13483, 16494, 16500, 16511, 16525, 18387, 19122, 83814, 98660, 108737, 225030, 238161, 338370
GO:0015075	ion transmembrane transporter activity	GOMF	677	-0.0364942	0.797083	0.00120259	0.0385612	depleted	11303, 11747, 11749, 11927, 11931, 11932, 11944, 11946, 11947, 11950, 11951, 11957, 11973, 12289, 12290, 12297, 12724, 12728, 12857, 12866, 12868, 12892, 13058, 13521, 14057, 14396, 14397, 14408, 14807, 14977, 15561, 16410, 16439, 16494, 16500, 16511, 16525, 16796, 17992, 18439, 19229, 19712, 19746, 19775, 20190, 20191, 20192, 20274, 20498, 20501, 20522, 20529, 22042, 22068, 22333, 22335, 22782, …
GO:0050802	circadian sleep/wake cycle, sleep	GOBP	28	-0.875621	0.00433236	0.00236865	0.0392756	depleted	NA
GO:0071805	potassium ion transmembrane transport	GOBP	146	-0.114835	0.48985	0.00253817	0.0409367	depleted	11472, 11931, 11932, 11944, 12289, 12373, 12389, 13483, 16494, 16500, 16511, 16525, 18387, 19122, 83814, 98660, 108737, 225030, 238161, 338370
GO:0009190	cyclic nucleotide biosynthetic process	GOBP	130	-0.126216	0.4564	0.0027156	0.0428881	depleted	11303, 11535, 11538, 11556, 11803, 12331, 14680, 14708, 14745, 15444, 18015, 18103, 18125, 18127, 19229, 21858, 51799, 53322, 104111, 210044, 234889, 238161
GO:0008227	G-protein coupled amine receptor activity	GOMF	37	-0.624765	0.0205958	0.0014956	0.0445209	depleted	11556, 15561
GO:0071855	neuropeptide receptor binding	GOMF	28	-1.07823	0.00122998	0.00144081	0.0445209	depleted	12426
GO:0007271	synaptic transmission, cholinergic	GOBP	41	-0.437014	0.0661472	0.00293014	0.0451608	depleted	18053, 320360
GO:0019724	B cell mediated immunity	GOBP	87	-0.182697	0.321297	0.00294024	0.0451986	depleted	12261, 13137, 15510, 16149, 16331, 17688, 18753, 20852, 22042, 65113, 72544, 108138
GO:0045187	regulation of circadian sleep/wake cycle, sleep	GOBP	27	-0.851028	0.00504778	0.00304302	0.0463458	depleted	NA
GO:0052652	cyclic purine nucleotide metabolic process	GOBP	129	-0.123804	0.463293	0.00312073	0.0469412	depleted	11303, 11535, 11538, 11556, 11803, 12331, 14680, 14708, 14745, 15444, 18015, 18103, 18125, 18127, 19229, 21858, 51799, 53322, 104111, 210044, 234889, 238161
GO:0016064	immunoglobulin mediated immune response	GOBP	86	-0.181694	0.323305	0.00319105	0.0473285	depleted	12261, 13137, 15510, 16149, 16331, 17688, 18753, 20852, 22042, 65113, 72544, 108138
